# Supplementary material for: The frequent complete subgraphs in the human connectome
Source: PubMed Central journal article supplement (PMC7444532; doi:10.1371/journal.pone.0236883), 2020-08-20
Supplement: pone.0236883.s001.pdf [file pone.0236883.s001.pdf]

| 1 frequency | name                                                                |
|-------------|---------------------------------------------------------------------|
| 2           | 1 (Left-Caudate)(Left-Pallidum)(Left-Putamen)(Left-Thalamus-Proper) |
| 3           | 1 (Left-Caudate)(Left-Pallidum)(Left-Putamen)                       |
| 4           | 1 (Left-Caudate)(Left-Pallidum)(Left-Thalamus-Proper)               |
| 5           | 1 (Left-Caudate)(Left-Pallidum)                                     |
| 6           | 1 (Left-Caudate)(Left-Putamen)(Left-Thalamus-Proper)                |
| 7           | 1 (Left-Caudate)(Left-Putamen)                                      |
| 8           | 1 (Left-Caudate)(Left-Thalamus-Proper)                              |
| 9           | 1 (Left-Caudate)(lh.caudalanteriorcingulate_2)                      |
| 10          | 1 (Left-Caudate)(lh.caudalmiddlefrontal_6)                          |
| 11          | 1 (Left-Caudate)(lh.posteriorcingulate_1)                           |
| 12          | 1 (Left-Caudate)(lh.posteriorcingulate_3)                           |
| 13          | 1 (Left-Hippocampus)(Left-Putamen)(Left-Thalamus-Proper)            |
| 14          | 1 (Left-Hippocampus)(Left-Putamen)                                  |
| 15          | 1 (Left-Hippocampus)(Left-Thalamus-Proper)                          |
| 16          | 1 (Left-Hippocampus)(lh.isthmuscingulate_3)                         |
| 17          | 1 (Left-Pallidum)(Left-Putamen)(Left-Thalamus-Proper)               |
| 18          | 1 (Left-Pallidum)(Left-Putamen)                                     |
| 19          | 1 (Left-Pallidum)(Left-Thalamus-Proper)                             |
| 20          | 1 (Left-Putamen)(Left-Thalamus-Proper)(lh.insula_1)                 |
| 21          | 1 (Left-Putamen)(Left-Thalamus-Proper)                              |
| 22          | 1 (Left-Putamen)(lh.insula_1)                                       |
| 23          | 1 (Left-Putamen)(lh.insula_2)                                       |
| 24          | 1 (Left-Putamen)(lh.insula_3)                                       |
| 25          | 1 (Left-Putamen)(lh.insula_6)                                       |
| 26          | 1 (Left-Putamen)(lh.precentral_11)                                  |
| 27          | 1 (Left-Thalamus-Proper)(lh.insula_1)                               |
| 28          | 1 (Left-Thalamus-Proper)(Right-Thalamus-Proper)                     |
| 29          | 1 (lh.caudalmiddlefrontal_5)(lh.caudalmiddlefrontal_6)              |
| 30          | 1 (lh.fusiform_1)(lh.fusiform_5)                                    |
| 31          | 1 (lh.insula_1)(lh.supramarginal_1)                                 |
| 32          | 1 (lh.insula_6)(lh.parsopercularis_3)                               |
| 33          | 1 (lh.parsopercularis_1)(lh.parsopercularis_3)                      |
| 34          | 1 (lh.parsopercularis_1)(lh.parstriangularis_3)                     |
| 35          | 1 (lh.parstriangularis_3)(lh.rostralmiddlefrontal_1)                |
| 36          | 1 (lh.postcentral_14)(lh.precentral_16)                             |
| 37          | 1 (lh.precentral_11)(lh.precentral_9)                               |
| 38          | 1 (lh.superiorfrontal_10)(lh.superiorfrontal_8)                     |
| 39          | 1 (lh.superiorfrontal_11)(lh.superiorfrontal_8)                     |
| 40          | 1 (lh.superiorfrontal_14)(lh.superiorfrontal_15)                    |
| 41          | 1 (lh.superiorfrontal_14)(lh.superiorfrontal_8)                     |
| 42          | 1 (lh.superiorfrontal_15)(lh.superiorfrontal_18)                    |
| 43          | 1 (lh.superiorfrontal_4)(lh.superiorfrontal_7)                      |
| 44          | 1 (lh.superiorfrontal_4)(lh.superiorfrontal_8)                      |
| 45          | 1 (rh.caudalmiddlefrontal_4)(rh.caudalmiddlefrontal_5)              |
| 46          | 1 (rh.fusiform_1)(rh.lateraloccipital_10)                           |
| 47          | 1 (rh.fusiform_1)(rh.lateraloccipital_8)                            |
| 48          | 1 (rh.fusiform_3)(rh.lateraloccipital_10)                           |
| 49          | 1 (rh.insula_1)(rh.supramarginal_9)                                 |
| 50          | 1 (rh.paracentral_5)(rh.precentral_15)                              |

51 1 (rh.parsopercularis\_2)(rh.parsopercularis\_4)  
52 1 (rh.precentral\_10)(rh.precentral\_7)  
53 1 (rh.precentral\_13)(rh.precentral\_7)  
54 1 (rh.superiorfrontal\_11)(rh.superiorfrontal\_8)  
55 1 (rh.superiorfrontal\_16)(rh.superiorfrontal\_17)  
56 1 (rh.superiorfrontal\_5)(rh.superiorfrontal\_8)  
57 1 (rh.superiorfrontal\_7)(rh.superiorfrontal\_8)(rh.superiorfrontal\_9)  
58 1 (rh.superiorfrontal\_7)(rh.superiorfrontal\_8)  
59 1 (rh.superiorfrontal\_7)(rh.superiorfrontal\_9)  
60 1 (rh.superiorfrontal\_8)(rh.superiorfrontal\_9)  
61 1 (rh.superiorparietal\_1)(rh.superiorparietal\_7)  
62 1 (rh.supramarginal\_8)(rh.supramarginal\_9)  
63 1 (Right-Caudate)(rh.caudalanteriorcingulate\_2)  
64 1 (Right-Caudate)(rh.caudalanteriorcingulate\_3)  
65 1 (Right-Caudate)(rh.posteriorcingulate\_1)  
66 1 (Right-Caudate)(rh.posteriorcingulate\_2)  
67 1 (Right-Caudate)(rh.posteriorcingulate\_3)  
68 1 (Right-Caudate)(rh.precentral\_13)  
69 1 (Right-Caudate)(Right-Pallidum)(Right-Putamen)(Right-Thalamus-Proper)  
70 1 (Right-Caudate)(Right-Pallidum)(Right-Putamen)  
71 1 (Right-Caudate)(Right-Pallidum)(Right-Thalamus-Proper)  
72 1 (Right-Caudate)(Right-Pallidum)  
73 1 (Right-Caudate)(Right-Putamen)(Right-Thalamus-Proper)  
74 1 (Right-Caudate)(Right-Putamen)  
75 1 (Right-Caudate)(Right-Thalamus-Proper)  
76 1 (Right-Hippocampus)(rh.isthmuscingulate\_2)  
77 1 (Right-Hippocampus)(Right-Putamen)(Right-Thalamus-Proper)  
78 1 (Right-Hippocampus)(Right-Putamen)  
79 1 (Right-Hippocampus)(Right-Thalamus-Proper)  
80 1 (Right-Pallidum)(Right-Putamen)(Right-Thalamus-Proper)  
81 1 (Right-Pallidum)(Right-Putamen)  
82 1 (Right-Pallidum)(Right-Thalamus-Proper)  
83 1 (Right-Putamen)(rh.caudalmiddlefrontal\_4)  
84 1 (Right-Putamen)(rh.insula\_1)  
85 1 (Right-Putamen)(rh.insula\_2)  
86 1 (Right-Putamen)(rh.insula\_3)  
87 1 (Right-Putamen)(rh.insula\_4)  
88 1 (Right-Putamen)(rh.insula\_6)  
89 1 (Right-Putamen)(rh.insula\_7)  
90 1 (Right-Putamen)(rh.precentral\_7)  
91 1 (Right-Putamen)(Right-Thalamus-Proper)(rh.insula\_2)  
92 1 (Right-Putamen)(Right-Thalamus-Proper)  
93 1 (Right-Thalamus-Proper)(rh.insula\_2)  
94 0.99758 (Left-Caudate)(lh.caudalanteriorcingulate\_1)(lh.caudalanteriorcingulate\_2)  
95 0.99758 (Left-Caudate)(lh.caudalanteriorcingulate\_1)  
96 0.99758 (Left-Caudate)(Right-Caudate)  
97 0.99758 (Left-Hippocampus)(lh.superiortemporal\_2)  
98 0.99758 (Left-Putamen)(lh.caudalmiddlefrontal\_3)  
99 0.99758 (Left-Putamen)(lh.caudalmiddlefrontal\_4)  
100 0.99758 (lh.caudalanteriorcingulate\_1)(lh.caudalanteriorcingulate\_2)

101 0.99758 (lh.caudalmiddlefrontal\_4)(lh.caudalmiddlefrontal\_6)  
102 0.99758 (lh.inferiorparietal\_8)(lh.inferiorparietal\_9)  
103 0.99758 (lh.lingual\_6)(lh.lingual\_8)  
104 0.99758 (lh.paracentral\_4)(lh.paracentral\_5)  
105 0.99758 (lh.paracentral\_4)(lh.precentral\_2)  
106 0.99758 (lh.paracentral\_4)(lh.precentral\_3)  
107 0.99758 (lh.paracentral\_5)(lh.precentral\_2)  
108 0.99758 (lh.rostralmiddlefrontal\_1)(lh.rostralmiddlefrontal\_4)  
109 0.99758 (lh.superiorfrontal\_10)(lh.superiorfrontal\_4)(lh.superiorfrontal\_8)  
110 0.99758 (lh.superiorfrontal\_10)(lh.superiorfrontal\_4)  
111 0.99758 (lh.superiorfrontal\_10)(lh.superiorfrontal\_7)  
112 0.99758 (lh.superiorfrontal\_11)(lh.superiorfrontal\_4)(lh.superiorfrontal\_8)  
113 0.99758 (lh.superiorfrontal\_11)(lh.superiorfrontal\_4)  
114 0.99758 (lh.superiorfrontal\_12)(lh.superiorfrontal\_14)  
115 0.99758 (lh.superiorfrontal\_13)(lh.superiorfrontal\_14)  
116 0.99758 (lh.superiorfrontal\_14)(lh.superiorfrontal\_17)  
117 0.99758 (lh.superiorfrontal\_15)(lh.superiorfrontal\_16)  
118 0.99758 (lh.superiorfrontal\_4)(lh.superiorfrontal\_5)  
119 0.99758 (lh.superiorfrontal\_4)(lh.superiorfrontal\_7)(lh.superiorfrontal\_8)  
120 0.99758 (lh.superiorfrontal\_7)(lh.superiorfrontal\_8)  
121 0.99758 (lh.superiorfrontal\_7)(lh.superiorfrontal\_9)  
122 0.99758 (rh.caudalmiddlefrontal\_4)(rh.insula\_3)  
123 0.99758 (rh.inferiorparietal\_1)(rh.inferiorparietal\_4)  
124 0.99758 (rh.lateraloccipital\_7)(rh.lingual\_2)  
125 0.99758 (rh.lingual\_5)(rh.lingual\_7)  
126 0.99758 (rh.precentral\_11)(rh.precentral\_13)  
127 0.99758 (rh.precuneus\_1)(rh.superiorparietal\_11)  
128 0.99758 (rh.superiorfrontal\_11)(rh.superiorfrontal\_13)  
129 0.99758 (rh.superiorfrontal\_11)(rh.superiorfrontal\_8)(rh.superiorfrontal\_9)  
130 0.99758 (rh.superiorfrontal\_11)(rh.superiorfrontal\_9)  
131 0.99758 (rh.superiorfrontal\_5)(rh.superiorfrontal\_6)  
132 0.99758 (rh.superiorfrontal\_5)(rh.superiorfrontal\_7)(rh.superiorfrontal\_8)  
133 0.99758 (rh.superiorfrontal\_5)(rh.superiorfrontal\_7)  
134 0.99758 (Right-Caudate)(rh.caudalmiddlefrontal\_4)  
135 0.99758 (Right-Caudate)(Right-Putamen)(rh.caudalmiddlefrontal\_4)  
136 0.99758 (Right-Caudate)(Right-Putamen)(rh.precentral\_13)  
137 0.99758 (Right-Hippocampus)(rh.bankssts\_2)  
138 0.99758 (Right-Hippocampus)(rh.insula\_2)  
139 0.99758 (Right-Hippocampus)(rh.lingual\_7)  
140 0.99758 (Right-Hippocampus)(Right-Pallidum)(Right-Putamen)(Right-Thalamus-Proper)  
141 0.99758 (Right-Hippocampus)(Right-Pallidum)(Right-Putamen)  
142 0.99758 (Right-Hippocampus)(Right-Pallidum)(Right-Thalamus-Proper)  
143 0.99758 (Right-Hippocampus)(Right-Pallidum)  
144 0.99758 (Right-Hippocampus)(Right-Putamen)(rh.insula\_2)  
145 0.99758 (Right-Hippocampus)(Right-Putamen)(Right-Thalamus-Proper)(rh.insula\_2)  
146 0.99758 (Right-Hippocampus)(Right-Thalamus-Proper)(rh.insula\_2)  
147 0.99758 (Right-Putamen)(rh.caudalmiddlefrontal\_4)(rh.insula\_3)  
148 0.99758 (Right-Putamen)(rh.insula\_1)(rh.supramarginal\_9)  
149 0.99758 (Right-Putamen)(rh.parsopercularis\_4)  
150 0.99758 (Right-Putamen)(rh.precentral\_13)(rh.precentral\_7)

151 0.99758 (Right-Putamen)(rh.precentral\_13)  
152 0.99758 (Right-Putamen)(rh.precentral\_5)  
153 0.99758 (Right-Putamen)(rh.supramarginal\_9)  
154 0.99517 (Left-Caudate)(Left-Putamen)(lh.caudalmiddlefrontal\_3)  
155 0.99517 (Left-Caudate)(Left-Putamen)(lh.precentral\_11)  
156 0.99517 (Left-Caudate)(lh.caudalanteriorcingulate\_2)(lh.posteriorcingulate\_1)  
157 0.99517 (Left-Caudate)(lh.caudalmiddlefrontal\_3)  
158 0.99517 (Left-Caudate)(lh.posteriorcingulate\_2)  
159 0.99517 (Left-Caudate)(lh.precentral\_11)  
160 0.99517 (Left-Caudate)(lh.superiorfrontal\_12)  
161 0.99517 (Left-Hippocampus)(Left-Putamen)(lh.insula\_2)  
162 0.99517 (Left-Hippocampus)(lh.insula\_2)  
163 0.99517 (Left-Putamen)(lh.insula\_2)(lh.precentral\_11)  
164 0.99517 (Left-Putamen)(lh.precentral\_11)(lh.precentral\_9)  
165 0.99517 (Left-Putamen)(lh.precentral\_9)  
166 0.99517 (lh.caudalanteriorcingulate\_2)(lh.posteriorcingulate\_1)  
167 0.99517 (lh.caudalmiddlefrontal\_4)(lh.caudalmiddlefrontal\_5)  
168 0.99517 (lh.fusiform\_1)(lh.fusiform\_2)  
169 0.99517 (lh.fusiform\_2)(lh.lateraloccipital\_6)  
170 0.99517 (lh.insula\_2)(lh.precentral\_11)  
171 0.99517 (lh.isthmuscingulate\_3)(lh.precuneus\_11)  
172 0.99517 (lh.lateraloccipital\_6)(lh.pericalcarine\_3)  
173 0.99517 (lh.superiorfrontal\_10)(lh.superiorfrontal\_11)(lh.superiorfrontal\_8)  
174 0.99517 (lh.superiorfrontal\_10)(lh.superiorfrontal\_11)  
175 0.99517 (lh.superiorfrontal\_10)(lh.superiorfrontal\_4)(lh.superiorfrontal\_7)  
176 0.99517 (lh.superiorfrontal\_10)(lh.superiorfrontal\_7)(lh.superiorfrontal\_8)  
177 0.99517 (lh.superiorfrontal\_3)(lh.superiorfrontal\_4)  
178 0.99517 (lh.superiorfrontal\_4)(lh.superiorfrontal\_6)  
179 0.99517 (rh.fusiform\_1)(rh.lateraloccipital\_10)(rh.lateraloccipital\_8)  
180 0.99517 (rh.fusiform\_1)(rh.lingual\_2)  
181 0.99517 (rh.fusiform\_2)(rh.lateraloccipital\_10)  
182 0.99517 (rh.inferiorparietal\_11)(rh.inferiorparietal\_12)  
183 0.99517 (rh.inferiorparietal\_12)(rh.inferiorparietal\_8)  
184 0.99517 (rh.insula\_1)(rh.insula\_3)  
185 0.99517 (rh.insula\_2)(rh.insula\_4)  
186 0.99517 (rh.lateraloccipital\_10)(rh.lateraloccipital\_8)  
187 0.99517 (rh.lateraloccipital\_4)(rh.lateraloccipital\_8)  
188 0.99517 (rh.parsopercularis\_2)(rh.parsopercularis\_3)  
189 0.99517 (rh.precuneus\_4)(rh.precuneus\_7)  
190 0.99517 (rh.superiorfrontal\_10)(rh.superiorfrontal\_11)  
191 0.99517 (rh.superiorfrontal\_6)(rh.superiorfrontal\_8)  
192 0.99517 (Right-Caudate)(rh.caudalanteriorcingulate\_1)  
193 0.99517 (Right-Caudate)(rh.parsopercularis\_4)  
194 0.99517 (Right-Putamen)(rh.insula\_1)(rh.insula\_3)  
195 0.99517 (Right-Putamen)(rh.insula\_2)(rh.insula\_4)  
196 0.99517 (Right-Putamen)(rh.insula\_5)  
197 0.99275 (Left-Amygdala)(Left-Putamen)(Left-Thalamus-Proper)  
198 0.99275 (Left-Amygdala)(Left-Putamen)  
199 0.99275 (Left-Amygdala)(Left-Thalamus-Proper)  
200 0.99275 (Left-Caudate)(lh.precentral\_4)

201 0.99275 (Left-Putamen)(lh.insula\_1)(lh.precentral\_11)  
202 0.99275 (Left-Putamen)(lh.insula\_6)(lh.parsopercularis\_3)  
203 0.99275 (Left-Putamen)(lh.parsopercularis\_3)  
204 0.99275 (lh.caudalanteriorcingulate\_2)(lh.rostralanteriorcingulate\_2)  
205 0.99275 (lh.caudalmiddlefrontal\_4)(lh.caudalmiddlefrontal\_5)(lh.caudalmiddlefrontal\_6)  
206 0.99275 (lh.cuneus\_1)(lh.superiorparietal\_12)  
207 0.99275 (lh.fusiform\_2)(lh.lingual\_8)  
208 0.99275 (lh.insula\_1)(lh.precentral\_11)  
209 0.99275 (lh.isthmuscingulate\_2)(lh.isthmuscingulate\_3)  
210 0.99275 (lh.lateraloccipital\_2)(lh.pericalcarine\_2)  
211 0.99275 (lh.paracentral\_1)(lh.paracentral\_4)  
212 0.99275 (lh.paracentral\_4)(lh.paracentral\_5)(lh.precentral\_2)  
213 0.99275 (lh.posteriorcingulate\_1)(lh.posteriorcingulate\_2)  
214 0.99275 (lh.precentral\_6)(lh.precentral\_7)  
215 0.99275 (lh.precuneus\_9)(lh.superiorparietal\_11)  
216 0.99275 (lh.superiorfrontal\_10)(lh.superiorfrontal\_4)(lh.superiorfrontal\_7)(lh.superiorfrontal\_8)  
217 0.99275 (lh.superiorfrontal\_11)(lh.superiorfrontal\_12)  
218 0.99275 (lh.superiorfrontal\_14)(lh.superiorfrontal\_9)  
219 0.99275 (lh.superiorfrontal\_16)(lh.superiorfrontal\_18)  
220 0.99275 (lh.superiorfrontal\_3)(lh.superiorfrontal\_4)(lh.superiorfrontal\_5)  
221 0.99275 (lh.superiorfrontal\_3)(lh.superiorfrontal\_5)  
222 0.99275 (lh.superiorfrontal\_6)(lh.superiorfrontal\_7)  
223 0.99275 (lh.supramarginal\_6)(lh.supramarginal\_9)  
224 0.99275 (rh.fusiform\_1)(rh.fusiform\_3)(rh.lateraloccipital\_10)  
225 0.99275 (rh.fusiform\_1)(rh.fusiform\_3)  
226 0.99275 (rh.fusiform\_1)(rh.lateraloccipital\_7)  
227 0.99275 (rh.fusiform\_1)(rh.lingual\_5)  
228 0.99275 (rh.isthmuscingulate\_2)(rh.precuneus\_3)  
229 0.99275 (rh.lateraloccipital\_3)(rh.lateraloccipital\_4)  
230 0.99275 (rh.lateraloccipital\_7)(rh.lateraloccipital\_8)  
231 0.99275 (rh.lingual\_7)(rh.precuneus\_2)  
232 0.99275 (rh.rostralmiddlefrontal\_3)(rh.rostralmiddlefrontal\_5)  
233 0.99275 (rh.superiorfrontal\_5)(rh.superiorfrontal\_6)(rh.superiorfrontal\_8)  
234 0.99275 (rh.superiorfrontal\_6)(rh.superiorfrontal\_7)  
235 0.99275 (Right-Caudate)(rh.insula\_1)  
236 0.99275 (Right-Caudate)(rh.posteriorcingulate\_4)  
237 0.99275 (Right-Caudate)(Right-Putamen)(rh.insula\_1)  
238 0.99275 (Right-Caudate)(Right-Putamen)(rh.parsopercularis\_4)  
239 0.99034 (Left-Accumbens-area)(Left-Pallidum)(Left-Thalamus-Proper)  
240 0.99034 (Left-Accumbens-area)(Left-Pallidum)  
241 0.99034 (Left-Accumbens-area)(Left-Thalamus-Proper)  
242 0.99034 (Left-Amygdala)(Left-Hippocampus)(Left-Putamen)(Left-Thalamus-Proper)  
243 0.99034 (Left-Amygdala)(Left-Hippocampus)(Left-Putamen)  
244 0.99034 (Left-Amygdala)(Left-Hippocampus)(Left-Thalamus-Proper)  
245 0.99034 (Left-Amygdala)(Left-Hippocampus)  
246 0.99034 (Left-Amygdala)(Left-Pallidum)(Left-Putamen)(Left-Thalamus-Proper)  
247 0.99034 (Left-Amygdala)(Left-Pallidum)(Left-Putamen)  
248 0.99034 (Left-Amygdala)(Left-Pallidum)(Left-Thalamus-Proper)  
249 0.99034 (Left-Amygdala)(Left-Pallidum)  
250 0.99034 (Left-Caudate)(Left-Putamen)(lh.caudalanteriorcingulate\_2)

251 0.99034 (Left-Caudate)(lh.rostralanteriorcingulate\_1)  
252 0.99034 (Left-Caudate)(lh.rostralanteriorcingulate\_2)  
253 0.99034 (Left-Caudate)(lh.superiorfrontal\_11)  
254 0.99034 (Left-Hippocampus)(lh.fusiform\_5)  
255 0.99034 (Left-Putamen)(lh.caudalanteriorcingulate\_2)  
256 0.99034 (Left-Putamen)(lh.insula\_5)  
257 0.99034 (Left-Putamen)(lh.insula\_7)  
258 0.99034 (Left-Putamen)(lh.lateralorbitofrontal\_4)  
259 0.99034 (Left-Putamen)(lh.postcentral\_8)  
260 0.99034 (Left-Putamen)(lh.precentral\_14)  
261 0.99034 (Left-Putamen)(lh.precentral\_7)  
262 0.99034 (lh.caudalanteriorcingulate\_2)(lh.superiorfrontal\_11)  
263 0.99034 (lh.caudalanteriorcingulate\_2)(lh.superiorfrontal\_14)  
264 0.99034 (lh.caudalanteriorcingulate\_2)(lh.superiorfrontal\_8)  
265 0.99034 (lh.caudalmiddlefrontal\_3)(lh.caudalmiddlefrontal\_4)  
266 0.99034 (lh.caudalmiddlefrontal\_4)(lh.precentral\_11)  
267 0.99034 (lh.fusiform\_2)(lh.lateraloccipital\_10)  
268 0.99034 (lh.fusiform\_4)(lh.fusiform\_5)  
269 0.99034 (lh.lateraloccipital\_3)(lh.pericalcarine\_2)  
270 0.99034 (lh.lingual\_1)(lh.pericalcarine\_2)  
271 0.99034 (lh.parsopercularis\_3)(lh.parsopercularis\_4)  
272 0.99034 (lh.postcentral\_14)(lh.supramarginal\_2)  
273 0.99034 (lh.precentral\_11)(lh.precentral\_4)  
274 0.99034 (lh.precentral\_11)(lh.precentral\_7)  
275 0.99034 (lh.precuneus\_10)(lh.precuneus\_9)  
276 0.99034 (lh.precuneus\_6)(lh.superiorparietal\_6)  
277 0.99034 (lh.precuneus\_8)(lh.precuneus\_9)  
278 0.99034 (lh.rostralmiddlefrontal\_8)(lh.superiorfrontal\_4)  
279 0.99034 (lh.superiorfrontal\_10)(lh.superiorfrontal\_11)(lh.superiorfrontal\_4)(lh.superiorfrontal\_8)  
280 0.99034 (lh.superiorfrontal\_10)(lh.superiorfrontal\_11)(lh.superiorfrontal\_4)  
281 0.99034 (lh.superiorfrontal\_12)(lh.superiorfrontal\_8)  
282 0.99034 (lh.superiorfrontal\_13)(lh.superiorfrontal\_9)  
283 0.99034 (lh.superiorfrontal\_15)(lh.superiorfrontal\_16)(lh.superiorfrontal\_18)  
284 0.99034 (lh.superiorparietal\_5)(lh.superiorparietal\_6)  
285 0.99034 (rh.bankssts\_2)(rh.inferiorparietal\_4)  
286 0.99034 (rh.insula\_2)(rh.insula\_3)  
287 0.99034 (rh.insula\_3)(rh.parsopercularis\_4)  
288 0.99034 (rh.lateraloccipital\_3)(rh.superiorparietal\_11)  
289 0.99034 (rh.paracentral\_4)(rh.precentral\_14)  
290 0.99034 (rh.paracentral\_4)(rh.precentral\_15)  
291 0.99034 (rh.precentral\_5)(rh.precentral\_6)  
292 0.99034 (rh.precuneus\_10)(rh.superiorparietal\_7)  
293 0.99034 (rh.precuneus\_8)(rh.superiorparietal\_8)  
294 0.99034 (rh.superiorfrontal\_4)(rh.superiorfrontal\_5)  
295 0.99034 (rh.superiorparietal\_1)(rh.supramarginal\_9)  
296 0.99034 (rh.superiorparietal\_10)(rh.superiorparietal\_7)  
297 0.99034 (rh.superiorparietal\_7)(rh.superiorparietal\_8)  
298 0.99034 (rh.supramarginal\_6)(rh.supramarginal\_8)  
299 0.99034 (Right-Amygdala)(rh.insula\_5)  
300 0.99034 (Right-Amygdala)(Right-Thalamus-Proper)

301 0.99034 (Right-Putamen)(rh.insula\_2)(rh.insula\_3)  
302 0.98792 (Left-Caudate)(Left-Putamen)(Left-Thalamus-Proper)(lh.insula\_1)  
303 0.98792 (Left-Caudate)(Left-Putamen)(lh.insula\_1)  
304 0.98792 (Left-Caudate)(Left-Putamen)(lh.insula\_6)  
305 0.98792 (Left-Caudate)(Left-Thalamus-Proper)(lh.insula\_1)  
306 0.98792 (Left-Caudate)(lh.caudalanteriorcingulate\_2)(lh.caudalmiddlefrontal\_3)  
307 0.98792 (Left-Caudate)(lh.insula\_1)  
308 0.98792 (Left-Caudate)(lh.insula\_6)  
309 0.98792 (Left-Caudate)(lh.posteriorcingulate\_1)(lh.posteriorcingulate\_2)  
310 0.98792 (Left-Caudate)(lh.rostralmiddlefrontal\_4)  
311 0.98792 (Left-Hippocampus)(Left-Pallidum)(Left-Putamen)(Left-Thalamus-Proper)  
312 0.98792 (Left-Hippocampus)(Left-Pallidum)(Left-Putamen)  
313 0.98792 (Left-Hippocampus)(Left-Pallidum)(Left-Thalamus-Proper)  
314 0.98792 (Left-Hippocampus)(Left-Pallidum)  
315 0.98792 (Left-Putamen)(lh.caudalmiddlefrontal\_4)(lh.precentral\_11)  
316 0.98792 (Left-Putamen)(lh.precentral\_4)  
317 0.98792 (Left-Putamen)(lh.rostralmiddlefrontal\_4)  
318 0.98792 (lh.caudalanteriorcingulate\_2)(lh.caudalmiddlefrontal\_3)  
319 0.98792 (lh.caudalmiddlefrontal\_3)(lh.rostralmiddlefrontal\_1)  
320 0.98792 (lh.fusiform\_1)(lh.lingual\_8)  
321 0.98792 (lh.fusiform\_2)(lh.lingual\_1)  
322 0.98792 (lh.fusiform\_5)(lh.lingual\_8)  
323 0.98792 (lh.lingual\_6)(lh.precuneus\_11)  
324 0.98792 (lh.parstriangularis\_3)(lh.rostralmiddlefrontal\_1)(lh.rostralmiddlefrontal\_9)  
325 0.98792 (lh.parstriangularis\_3)(lh.rostralmiddlefrontal\_9)  
326 0.98792 (lh.postcentral\_12)(lh.precentral\_16)  
327 0.98792 (lh.postcentral\_13)(lh.postcentral\_14)  
328 0.98792 (lh.precentral\_11)(lh.precentral\_14)  
329 0.98792 (lh.rostralmiddlefrontal\_1)(lh.rostralmiddlefrontal\_9)  
330 0.98792 (lh.superiorfrontal\_12)(lh.superiorfrontal\_14)(lh.superiorfrontal\_8)  
331 0.98792 (lh.superiorfrontal\_4)(lh.superiorfrontal\_6)(lh.superiorfrontal\_7)  
332 0.98792 (rh.bankssts\_2)(rh.superiortemporal\_3)  
333 0.98792 (rh.fusiform\_2)(rh.fusiform\_3)  
334 0.98792 (rh.fusiform\_3)(rh.fusiform\_4)  
335 0.98792 (rh.inferiorparietal\_10)(rh.inferiorparietal\_8)  
336 0.98792 (rh.inferiortemporal\_7)(rh.middletemporal\_1)  
337 0.98792 (rh.lateraloccipital\_10)(rh.lateraloccipital\_9)  
338 0.98792 (rh.paracentral\_4)(rh.superiorfrontal\_16)  
339 0.98792 (rh.paracentral\_6)(rh.superiorparietal\_2)  
340 0.98792 (rh.rostralmiddlefrontal\_5)(rh.rostralmiddlefrontal\_8)  
341 0.98792 (rh.superiorfrontal\_2)(rh.superiorfrontal\_5)  
342 0.98792 (rh.superiorfrontal\_5)(rh.superiorfrontal\_6)(rh.superiorfrontal\_7)  
343 0.98792 (rh.superiorfrontal\_5)(rh.superiorfrontal\_8)(rh.superiorfrontal\_9)  
344 0.98792 (rh.superiorfrontal\_5)(rh.superiorfrontal\_9)  
345 0.98792 (rh.superiorfrontal\_6)(rh.superiorfrontal\_7)(rh.superiorfrontal\_8)  
346 0.98792 (rh.supramarginal\_1)(rh.supramarginal\_8)  
347 0.98792 (Right-Amygdala)(Right-Pallidum)(Right-Putamen)(Right-Thalamus-Proper)  
348 0.98792 (Right-Amygdala)(Right-Pallidum)(Right-Putamen)  
349 0.98792 (Right-Amygdala)(Right-Pallidum)(Right-Thalamus-Proper)  
350 0.98792 (Right-Amygdala)(Right-Pallidum)

351 0.98792 (Right-Amygdala)(Right-Putamen)(rh.insula\_5)  
352 0.98792 (Right-Amygdala)(Right-Putamen)(Right-Thalamus-Proper)  
353 0.98792 (Right-Amygdala)(Right-Putamen)  
354 0.98792 (Right-Caudate)(rh.rostralanteriorcingulate\_2)  
355 0.98792 (Right-Hippocampus)(rh.precuneus\_2)  
356 0.98792 (Right-Hippocampus)(rh.superiortemporal\_3)  
357 0.98792 (Right-Putamen)(rh.insula\_3)(rh.parsopercularis\_4)  
358 0.98792 (Right-Putamen)(rh.lateralorbitofrontal\_2)  
359 0.98792 (Right-Putamen)(rh.parstriangularis\_1)  
360 0.98792 (Right-Putamen)(rh.precentral\_10)(rh.precentral\_7)  
361 0.98792 (Right-Putamen)(rh.precentral\_10)  
362 0.98792 (Right-Putamen)(Right-Thalamus-Proper)(rh.insula\_1)  
363 0.98792 (Right-Thalamus-Proper)(rh.insula\_1)  
364 0.98551 (Left-Amygdala)(lh.insula\_4)  
365 0.98551 (Left-Caudate)(Left-Putamen)(lh.caudalmiddlefrontal\_6)  
366 0.98551 (Left-Caudate)(Left-Putamen)(lh.rostralanteriorcingulate\_1)  
367 0.98551 (Left-Caudate)(lh.caudalanteriorcingulate\_2)(lh.rostralanteriorcingulate\_2)  
368 0.98551 (Left-Caudate)(lh.caudalmiddlefrontal\_4)  
369 0.98551 (Left-Caudate)(lh.posteriorcingulate\_1)(lh.posteriorcingulate\_3)  
370 0.98551 (Left-Hippocampus)(lh.lingual\_8)  
371 0.98551 (Left-Putamen)(lh.caudalmiddlefrontal\_3)(lh.caudalmiddlefrontal\_4)  
372 0.98551 (Left-Putamen)(lh.caudalmiddlefrontal\_6)  
373 0.98551 (Left-Putamen)(lh.rostralanteriorcingulate\_1)  
374 0.98551 (lh.caudalanteriorcingulate\_1)(lh.caudalanteriorcingulate\_2)(lh.rostralanteriorcingulate\_2)  
375 0.98551 (lh.caudalanteriorcingulate\_1)(lh.rostralanteriorcingulate\_2)  
376 0.98551 (lh.fusiform\_1)(lh.lateraloccipital\_9)  
377 0.98551 (lh.fusiform\_2)(lh.lateraloccipital\_9)  
378 0.98551 (lh.lateraloccipital\_11)(lh.lateraloccipital\_6)  
379 0.98551 (lh.lateraloccipital\_6)(lh.lateraloccipital\_7)  
380 0.98551 (lh.lateraloccipital\_6)(lh.lingual\_1)  
381 0.98551 (lh.lingual\_1)(lh.lingual\_4)  
382 0.98551 (lh.parsopercularis\_1)(lh.parstriangularis\_3)(lh.rostralmiddlefrontal\_1)  
383 0.98551 (lh.parsopercularis\_1)(lh.rostralmiddlefrontal\_1)  
384 0.98551 (lh.parstriangularis\_2)(lh.parstriangularis\_3)  
385 0.98551 (lh.pericalcarine\_2)(lh.pericalcarine\_3)  
386 0.98551 (lh.posteriorcingulate\_1)(lh.posteriorcingulate\_3)  
387 0.98551 (lh.precuneus\_10)(lh.precuneus\_6)  
388 0.98551 (lh.precuneus\_6)(lh.precuneus\_9)  
389 0.98551 (lh.rostralmiddlefrontal\_4)(lh.rostralmiddlefrontal\_9)  
390 0.98551 (lh.superiorfrontal\_11)(lh.superiorfrontal\_9)  
391 0.98551 (lh.superiorfrontal\_14)(lh.superiorfrontal\_15)(lh.superiorfrontal\_18)  
392 0.98551 (lh.superiorfrontal\_14)(lh.superiorfrontal\_18)  
393 0.98551 (lh.supramarginal\_1)(lh.supramarginal\_2)  
394 0.98551 (rh.caudalmiddlefrontal\_4)(rh.superiorfrontal\_13)  
395 0.98551 (rh.fusiform\_1)(rh.lateraloccipital\_7)(rh.lateraloccipital\_8)  
396 0.98551 (rh.fusiform\_1)(rh.lateraloccipital\_7)(rh.lingual\_2)  
397 0.98551 (rh.inferiorparietal\_10)(rh.lateraloccipital\_10)  
398 0.98551 (rh.inferiortemporal\_6)(rh.inferiortemporal\_7)  
399 0.98551 (rh.isthmuscingulate\_2)(rh.precuneus\_2)  
400 0.98551 (rh.lateraloccipital\_1)(rh.lateraloccipital\_3)



401 0.98551 (rh.postcentral\_1)(rh.postcentral\_4)  
402 0.98551 (rh.precentral\_13)(rh.precentral\_15)  
403 0.98551 (rh.precentral\_4)(rh.precentral\_6)  
404 0.98551 (rh.precuneus\_10)(rh.superiorparietal\_1)  
405 0.98551 (rh.superiorfrontal\_5)(rh.superiorfrontal\_7)(rh.superiorfrontal\_8)(rh.superiorfrontal\_9)  
406 0.98551 (rh.superiorfrontal\_5)(rh.superiorfrontal\_7)(rh.superiorfrontal\_9)  
407 0.98551 (rh.superiorparietal\_1)(rh.supramarginal\_1)  
408 0.98551 (Right-Accumbens-area)(Right-Thalamus-Proper)  
409 0.98551 (Right-Amygdala)(Right-Hippocampus)(Right-Pallidum)(Right-Putamen)(Right-Thalamus-Proper)  
410 0.98551 (Right-Amygdala)(Right-Hippocampus)(Right-Pallidum)(Right-Putamen)  
411 0.98551 (Right-Amygdala)(Right-Hippocampus)(Right-Pallidum)(Right-Thalamus-Proper)  
412 0.98551 (Right-Amygdala)(Right-Hippocampus)(Right-Pallidum)  
413 0.98551 (Right-Amygdala)(Right-Hippocampus)(Right-Putamen)(Right-Thalamus-Proper)  
414 0.98551 (Right-Amygdala)(Right-Hippocampus)(Right-Putamen)  
415 0.98551 (Right-Amygdala)(Right-Hippocampus)(Right-Thalamus-Proper)  
416 0.98551 (Right-Amygdala)(Right-Hippocampus)  
417 0.98551 (Right-Caudate)(rh.superiorfrontal\_11)  
418 0.98551 (Right-Caudate)(Right-Hippocampus)(Right-Putamen)(Right-Thalamus-Proper)  
419 0.98551 (Right-Caudate)(Right-Hippocampus)(Right-Putamen)  
420 0.98551 (Right-Caudate)(Right-Hippocampus)(Right-Thalamus-Proper)  
421 0.98551 (Right-Caudate)(Right-Hippocampus)  
422 0.98551 (Right-Hippocampus)(rh.inferiorparietal\_10)  
423 0.98551 (Right-Putamen)(rh.precentral\_11)  
424 0.98551 (Right-Putamen)(rh.rostralmiddlefrontal\_8)  
425 0.98309 (Left-Amygdala)(Left-Hippocampus)(Left-Pallidum)(Left-Putamen)(Left-Thalamus-Proper)  
426 0.98309 (Left-Amygdala)(Left-Hippocampus)(Left-Pallidum)(Left-Putamen)  
427 0.98309 (Left-Amygdala)(Left-Hippocampus)(Left-Pallidum)(Left-Thalamus-Proper)  
428 0.98309 (Left-Amygdala)(Left-Hippocampus)(Left-Pallidum)  
429 0.98309 (Left-Caudate)(Left-Putamen)(lh.caudalmiddlefrontal\_4)  
430 0.98309 (Left-Caudate)(Left-Putamen)(lh.posteriorcingulate\_1)  
431 0.98309 (Left-Caudate)(Left-Putamen)(lh.precentral\_4)  
432 0.98309 (Left-Caudate)(Left-Thalamus-Proper)(lh.posteriorcingulate\_3)  
433 0.98309 (Left-Caudate)(lh.caudalanteriorcingulate\_2)(lh.superiorfrontal\_11)  
434 0.98309 (Left-Caudate)(lh.caudalmiddlefrontal\_4)(lh.caudalmiddlefrontal\_6)  
435 0.98309 (Left-Caudate)(lh.caudalmiddlefrontal\_5)(lh.caudalmiddlefrontal\_6)  
436 0.98309 (Left-Caudate)(lh.caudalmiddlefrontal\_5)  
437 0.98309 (Left-Caudate)(lh.paracentral\_5)  
438 0.98309 (Left-Caudate)(lh.rostralmiddlefrontal\_1)  
439 0.98309 (Left-Caudate)(lh.superiorfrontal\_14)  
440 0.98309 (Left-Hippocampus)(lh.lingual\_6)  
441 0.98309 (Left-Hippocampus)(lh.superiortemporal\_3)  
442 0.98309 (Left-Putamen)(lh.posteriorcingulate\_1)  
443 0.98309 (Left-Putamen)(lh.rostralanteriorcingulate\_2)  
444 0.98309 (Left-Thalamus-Proper)(lh.posteriorcingulate\_3)  
445 0.98309 (lh.fusiform\_2)(lh.lateraloccipital\_7)  
446 0.98309 (lh.inferiorparietal\_6)(lh.inferiorparietal\_8)  
447 0.98309 (lh.insula\_6)(lh.rostralmiddlefrontal\_1)  
448 0.98309 (lh.isthmuscingulate\_3)(lh.precuneus\_10)  
449 0.98309 (lh.lateraloccipital\_9)(lh.lingual\_8)  
450 0.98309 (lh.lingual\_1)(lh.pericalcarine\_3)

451 0.98309 (lh.lingual\_4)(lh.lingual\_8)  
452 0.98309 (lh.parsopercularis\_2)(lh.parstriangularis\_3)  
453 0.98309 (lh.precuneus\_6)(lh.precuneus\_8)  
454 0.98309 (lh.rostralmiddlefrontal\_1)(lh.rostralmiddlefrontal\_4)(lh.rostralmiddlefrontal\_9)  
455 0.98309 (lh.rostralmiddlefrontal\_3)(lh.rostralmiddlefrontal\_4)  
456 0.98309 (lh.rostralmiddlefrontal\_4)(lh.superiorfrontal\_4)  
457 0.98309 (lh.rostralmiddlefrontal\_6)(lh.rostralmiddlefrontal\_9)  
458 0.98309 (lh.superiorfrontal\_11)(lh.superiorfrontal\_12)(lh.superiorfrontal\_8)  
459 0.98309 (lh.superiorfrontal\_11)(lh.superiorfrontal\_4)(lh.superiorfrontal\_7)  
460 0.98309 (lh.superiorfrontal\_11)(lh.superiorfrontal\_7)  
461 0.98309 (lh.superiorfrontal\_14)(lh.superiorfrontal\_16)  
462 0.98309 (lh.superiorfrontal\_2)(lh.superiorfrontal\_3)  
463 0.98309 (lh.superiorfrontal\_2)(lh.superiorfrontal\_4)  
464 0.98309 (rh.fusiform\_1)(rh.fusiform\_2)  
465 0.98309 (rh.fusiform\_2)(rh.fusiform\_3)(rh.lateraloccipital\_10)  
466 0.98309 (rh.insula\_1)(rh.precentral\_7)  
467 0.98309 (rh.parsopercularis\_4)(rh.rostralmiddlefrontal\_3)  
468 0.98309 (rh.parstriangularis\_1)(rh.parstriangularis\_2)  
469 0.98309 (rh.parstriangularis\_1)(rh.rostralmiddlefrontal\_8)  
470 0.98309 (rh.postcentral\_1)(rh.precentral\_1)  
471 0.98309 (rh.precuneus\_2)(rh.superiorparietal\_11)  
472 0.98309 (rh.precuneus\_4)(rh.superiorparietal\_10)  
473 0.98309 (rh.rostralmiddlefrontal\_8)(rh.superiorfrontal\_2)  
474 0.98309 (rh.superiorfrontal\_10)(rh.superiorfrontal\_9)  
475 0.98309 (rh.superiorfrontal\_13)(rh.superiorfrontal\_9)  
476 0.98309 (rh.superiorfrontal\_2)(rh.superiorfrontal\_4)  
477 0.98309 (rh.superiorfrontal\_5)(rh.superiorfrontal\_6)(rh.superiorfrontal\_7)(rh.superiorfrontal\_8)  
478 0.98309 (Right-Caudate)(rh.rostralanteriorcingulate\_1)  
479 0.98309 (Right-Caudate)(Right-Hippocampus)(Right-Pallidum)(Right-Putamen)(Right-Thalamus-Proper)  
480 0.98309 (Right-Caudate)(Right-Hippocampus)(Right-Pallidum)(Right-Putamen)  
481 0.98309 (Right-Caudate)(Right-Hippocampus)(Right-Pallidum)(Right-Thalamus-Proper)  
482 0.98309 (Right-Caudate)(Right-Hippocampus)(Right-Pallidum)  
483 0.98309 (Right-Hippocampus)(rh.insula\_5)  
484 0.98309 (Right-Hippocampus)(rh.parahippocampal\_2)  
485 0.98309 (Right-Hippocampus)(rh.superiortemporal\_9)  
486 0.98309 (Right-Hippocampus)(rh.supramarginal\_9)  
487 0.98309 (Right-Hippocampus)(Right-Putamen)(rh.insula\_5)  
488 0.98309 (Right-Putamen)(rh.insula\_1)(rh.precentral\_7)  
489 0.98309 (Right-Putamen)(rh.precentral\_11)(rh.precentral\_13)  
490 0.98068 (Left-Accumbens-area)(Left-Caudate)  
491 0.98068 (Left-Amygdala)(lh.insula\_5)  
492 0.98068 (Left-Hippocampus)(lh.isthmuscingulate\_2)  
493 0.98068 (Left-Hippocampus)(lh.parahippocampal\_3)  
494 0.98068 (Left-Putamen)(lh.caudalmiddlefrontal\_4)(lh.caudalmiddlefrontal\_6)  
495 0.98068 (Left-Putamen)(lh.parstriangularis\_3)  
496 0.98068 (Left-Putamen)(lh.precentral\_11)(lh.precentral\_7)  
497 0.98068 (Left-Putamen)(lh.rostralmiddlefrontal\_1)  
498 0.98068 (Left-Putamen)(lh.rostralmiddlefrontal\_9)  
499 0.98068 (lh.caudalanteriorcingulate\_2)(lh.superiorfrontal\_11)(lh.superiorfrontal\_8)  
500 0.98068 (lh.caudalanteriorcingulate\_2)(lh.superiorfrontal\_12)

501 0.98068 (lh.caudalanteriorcingulate\_2)(lh.superiorfrontal\_14)(lh.superiorfrontal\_8)  
502 0.98068 (lh.caudalmiddlefrontal\_3)(lh.insula\_6)  
503 0.98068 (lh.inferiorparietal\_7)(lh.inferiorparietal\_8)  
504 0.98068 (lh.insula\_6)(lh.parsopercularis\_1)(lh.parsopercularis\_3)  
505 0.98068 (lh.insula\_6)(lh.parsopercularis\_1)  
506 0.98068 (lh.insula\_6)(lh.parstriangularis\_3)  
507 0.98068 (lh.lateraloccipital\_2)(lh.lateraloccipital\_3)  
508 0.98068 (lh.paracentral\_5)(lh.precentral\_4)  
509 0.98068 (lh.parsopercularis\_1)(lh.parsopercularis\_4)  
510 0.98068 (lh.precentral\_4)(lh.precentral\_7)  
511 0.98068 (lh.precuneus\_6)(lh.superiorparietal\_9)  
512 0.98068 (lh.rostralanteriorcingulate\_2)(lh.superiorfrontal\_4)  
513 0.98068 (lh.superiorfrontal\_1)(lh.superiorfrontal\_3)  
514 0.98068 (lh.superiorfrontal\_11)(lh.superiorfrontal\_4)(lh.superiorfrontal\_7)(lh.superiorfrontal\_8)  
515 0.98068 (lh.superiorfrontal\_11)(lh.superiorfrontal\_7)(lh.superiorfrontal\_8)  
516 0.98068 (lh.superiorfrontal\_13)(lh.superiorfrontal\_14)(lh.superiorfrontal\_9)  
517 0.98068 (lh.superiorfrontal\_14)(lh.superiorfrontal\_15)(lh.superiorfrontal\_16)  
518 0.98068 (rh.caudalmiddlefrontal\_3)(rh.caudalmiddlefrontal\_4)  
519 0.98068 (rh.insula\_1)(rh.supramarginal\_1)  
520 0.98068 (rh.isthmuscingulate\_2)(rh.precuneus\_7)  
521 0.98068 (rh.lateraloccipital\_4)(rh.lateraloccipital\_7)  
522 0.98068 (rh.lateraloccipital\_8)(rh.lateraloccipital\_9)  
523 0.98068 (rh.postcentral\_1)(rh.postcentral\_3)  
524 0.98068 (rh.precentral\_1)(rh.precentral\_6)  
525 0.98068 (rh.precuneus\_3)(rh.precuneus\_7)  
526 0.98068 (rh.precuneus\_4)(rh.precuneus\_5)  
527 0.98068 (rh.rostralmiddlefrontal\_10)(rh.superiorfrontal\_2)  
528 0.98068 (rh.rostralmiddlefrontal\_3)(rh.rostralmiddlefrontal\_8)  
529 0.98068 (rh.superiorfrontal\_1)(rh.superiorfrontal\_2)  
530 0.98068 (rh.superiorfrontal\_3)(rh.superiorfrontal\_4)  
531 0.98068 (rh.supramarginal\_1)(rh.supramarginal\_9)  
532 0.98068 (Right-Amygdala)(rh.insula\_6)  
533 0.98068 (Right-Amygdala)(Right-Putamen)(rh.insula\_6)  
534 0.98068 (Right-Caudate)(Right-Putamen)(rh.posteriorcingulate\_2)  
535 0.98068 (Right-Caudate)(Right-Putamen)(Right-Thalamus-Proper)(rh.insula\_1)  
536 0.98068 (Right-Caudate)(Right-Thalamus-Proper)(rh.insula\_1)  
537 0.98068 (Right-Hippocampus)(rh.inferiorparietal\_4)  
538 0.98068 (Right-Hippocampus)(Right-Putamen)(rh.supramarginal\_9)  
539 0.98068 (Right-Putamen)(rh.lateralorbitofrontal\_6)  
540 0.98068 (Right-Putamen)(rh.postcentral\_1)  
541 0.98068 (Right-Putamen)(rh.posteriorcingulate\_2)  
542 0.97826 (Left-Accumbens-area)(Left-Caudate)(Left-Pallidum)(Left-Thalamus-Proper)  
543 0.97826 (Left-Accumbens-area)(Left-Caudate)(Left-Pallidum)  
544 0.97826 (Left-Accumbens-area)(Left-Caudate)(Left-Thalamus-Proper)  
545 0.97826 (Left-Accumbens-area)(Left-Pallidum)(Left-Putamen)(Left-Thalamus-Proper)  
546 0.97826 (Left-Accumbens-area)(Left-Pallidum)(Left-Putamen)  
547 0.97826 (Left-Accumbens-area)(Left-Putamen)(Left-Thalamus-Proper)  
548 0.97826 (Left-Accumbens-area)(Left-Putamen)  
549 0.97826 (Left-Amygdala)(Left-Putamen)(lh.insula\_5)  
550 0.97826 (Left-Caudate)(Left-Putamen)(lh.caudalanteriorcingulate\_2)(lh.caudalmiddlefrontal\_3)

551 0.97826 (Left-Caudate)(Left-Putamen)(lh.rostralmiddlefrontal\_4)  
552 0.97826 (Left-Caudate)(lh.caudalanteriorcingulate\_1)(lh.caudalanteriorcingulate\_2)(lh.rostralanteriorcingulate\_2)  
553 0.97826 (Left-Caudate)(lh.caudalanteriorcingulate\_1)(lh.rostralanteriorcingulate\_2)  
554 0.97826 (Left-Caudate)(lh.caudalanteriorcingulate\_2)(lh.superiorfrontal\_12)  
555 0.97826 (Left-Caudate)(lh.posteriorcingulate\_4)  
556 0.97826 (Left-Caudate)(lh.precentral\_11)(lh.precentral\_4)  
557 0.97826 (Left-Caudate)(lh.rostralmiddlefrontal\_9)  
558 0.97826 (Left-Caudate)(lh.superiorfrontal\_11)(lh.superiorfrontal\_12)  
559 0.97826 (Left-Hippocampus)(lh.inferiorparietal\_5)  
560 0.97826 (Left-Putamen)(lh.caudalanteriorcingulate\_2)(lh.caudalmiddlefrontal\_3)  
561 0.97826 (Left-Putamen)(lh.caudalmiddlefrontal\_3)(lh.insula\_6)  
562 0.97826 (Left-Putamen)(lh.precentral\_11)(lh.precentral\_14)  
563 0.97826 (Left-Putamen)(lh.precentral\_11)(lh.precentral\_4)  
564 0.97826 (lh.caudalmiddlefrontal\_1)(lh.caudalmiddlefrontal\_3)  
565 0.97826 (lh.fusiform\_2)(lh.pericalcarine\_3)  
566 0.97826 (lh.fusiform\_5)(lh.fusiform\_6)  
567 0.97826 (lh.fusiform\_5)(lh.lateraloccipital\_9)  
568 0.97826 (lh.inferiorparietal\_6)(lh.inferiorparietal\_9)  
569 0.97826 (lh.medialorbitofrontal\_2)(lh.superiorfrontal\_3)  
570 0.97826 (lh.paracentral\_5)(lh.superiorfrontal\_14)  
571 0.97826 (lh.parsopercularis\_1)(lh.parsopercularis\_2)  
572 0.97826 (lh.postcentral\_8)(lh.supramarginal\_9)  
573 0.97826 (lh.precentral\_5)(lh.precentral\_7)  
574 0.97826 (lh.rostralanteriorcingulate\_1)(lh.rostralanteriorcingulate\_2)  
575 0.97826 (lh.rostralanteriorcingulate\_1)(lh.rostralmiddlefrontal\_9)  
576 0.97826 (lh.superiorfrontal\_10)(lh.superiorfrontal\_11)(lh.superiorfrontal\_7)  
577 0.97826 (lh.superiorfrontal\_11)(lh.superiorfrontal\_14)(lh.superiorfrontal\_8)  
578 0.97826 (lh.superiorfrontal\_11)(lh.superiorfrontal\_14)  
579 0.97826 (lh.superiorfrontal\_8)(lh.superiorfrontal\_9)  
580 0.97826 (rh.bankssts\_2)(rh.bankssts\_3)  
581 0.97826 (rh.cuneus\_3)(rh.pericalcarine\_2)  
582 0.97826 (rh.fusiform\_1)(rh.fusiform\_2)(rh.lateraloccipital\_10)  
583 0.97826 (rh.inferiorparietal\_10)(rh.inferiorparietal\_12)  
584 0.97826 (rh.inferiorparietal\_3)(rh.inferiorparietal\_4)  
585 0.97826 (rh.inferiorparietal\_4)(rh.inferiorparietal\_8)  
586 0.97826 (rh.insula\_1)(rh.insula\_2)  
587 0.97826 (rh.insula\_5)(rh.insula\_6)  
588 0.97826 (rh.parstriangularis\_1)(rh.parstriangularis\_4)  
589 0.97826 (rh.parstriangularis\_1)(rh.rostralmiddlefrontal\_3)  
590 0.97826 (rh.postcentral\_1)(rh.precentral\_6)  
591 0.97826 (rh.precentral\_14)(rh.precentral\_15)  
592 0.97826 (rh.precuneus\_10)(rh.superiorparietal\_1)(rh.superiorparietal\_7)  
593 0.97826 (rh.precuneus\_7)(rh.superiorparietal\_7)  
594 0.97826 (rh.superiorfrontal\_10)(rh.superiorfrontal\_11)(rh.superiorfrontal\_9)  
595 0.97826 (rh.superiorfrontal\_11)(rh.superiorfrontal\_12)  
596 0.97826 (rh.superiorfrontal\_11)(rh.superiorfrontal\_13)(rh.superiorfrontal\_9)  
597 0.97826 (rh.superiorfrontal\_2)(rh.superiorfrontal\_6)  
598 0.97826 (Right-Accumbens-area)(Right-Pallidum)  
599 0.97826 (Right-Amygdala)(Right-Hippocampus)(rh.insula\_5)  
600 0.97826 (Right-Amygdala)(Right-Hippocampus)(Right-Putamen)(rh.insula\_5)

601 0.97826 (Right-Hippocampus)(rh.lingual\_7)(rh.precuneus\_2)  
602 0.97826 (Right-Hippocampus)(rh.superiortemporal\_1)  
603 0.97826 (Right-Putamen)(rh.insula\_1)(rh.insula\_2)  
604 0.97826 (Right-Putamen)(rh.insula\_5)(rh.insula\_6)  
605 0.97826 (Right-Putamen)(rh.precentral\_6)  
606 0.97585 (Left-Caudate)(Left-Putamen)(Left-Thalamus-Proper)(lh.precentral\_11)  
607 0.97585 (Left-Caudate)(Left-Putamen)(lh.insula\_1)(lh.precentral\_11)  
608 0.97585 (Left-Caudate)(Left-Putamen)(lh.rostralanteriorcingulate\_2)  
609 0.97585 (Left-Caudate)(Left-Thalamus-Proper)(lh.precentral\_11)  
610 0.97585 (Left-Caudate)(lh.caudalmiddlefrontal\_1)  
611 0.97585 (Left-Caudate)(lh.insula\_1)(lh.precentral\_11)  
612 0.97585 (Left-Caudate)(lh.parsopercularis\_3)  
613 0.97585 (Left-Caudate)(lh.superiorfrontal\_12)(lh.superiorfrontal\_14)  
614 0.97585 (Left-Hippocampus)(lh.bankssts\_3)  
615 0.97585 (Left-Hippocampus)(lh.fusiform\_7)  
616 0.97585 (Left-Hippocampus)(lh.isthmuscingulate\_2)(lh.isthmuscingulate\_3)  
617 0.97585 (Left-Putamen)(Left-Thalamus-Proper)(lh.precentral\_11)  
618 0.97585 (Left-Putamen)(lh.insula\_1)(lh.supramarginal\_1)  
619 0.97585 (Left-Putamen)(lh.supramarginal\_1)  
620 0.97585 (Left-Thalamus-Proper)(lh.precentral\_11)  
621 0.97585 (lh.caudalmiddlefrontal\_3)(lh.rostralmiddlefrontal\_3)  
622 0.97585 (lh.fusiform\_1)(lh.fusiform\_2)(lh.lingual\_8)  
623 0.97585 (lh.fusiform\_1)(lh.fusiform\_5)(lh.lingual\_8)  
624 0.97585 (lh.inferiorparietal\_1)(lh.pericalcarine\_3)  
625 0.97585 (lh.lateraloccipital\_11)(lh.lingual\_1)  
626 0.97585 (lh.lateraloccipital\_2)(lh.lateraloccipital\_3)(lh.pericalcarine\_2)  
627 0.97585 (lh.paracentral\_3)(lh.paracentral\_5)  
628 0.97585 (lh.pericalcarine\_3)(lh.superiorparietal\_12)  
629 0.97585 (lh.postcentral\_12)(lh.postcentral\_14)  
630 0.97585 (lh.precuneus\_10)(lh.precuneus\_11)  
631 0.97585 (lh.precuneus\_11)(lh.precuneus\_9)  
632 0.97585 (lh.precuneus\_3)(lh.precuneus\_6)  
633 0.97585 (lh.superiorfrontal\_10)(lh.superiorfrontal\_11)(lh.superiorfrontal\_4)(lh.superiorfrontal\_7)  
634 0.97585 (lh.superiorfrontal\_10)(lh.superiorfrontal\_11)(lh.superiorfrontal\_7)(lh.superiorfrontal\_8)  
635 0.97585 (rh.caudalmiddlefrontal\_4)(rh.parsopercularis\_4)  
636 0.97585 (rh.caudalmiddlefrontal\_4)(rh.rostralmiddlefrontal\_1)  
637 0.97585 (rh.fusiform\_3)(rh.inferiortemporal\_7)  
638 0.97585 (rh.inferiorparietal\_10)(rh.lateraloccipital\_8)  
639 0.97585 (rh.insula\_7)(rh.parsopercularis\_4)  
640 0.97585 (rh.lateraloccipital\_1)(rh.pericalcarine\_2)  
641 0.97585 (rh.lateraloccipital\_3)(rh.pericalcarine\_2)  
642 0.97585 (rh.lateralorbitofrontal\_2)(rh.lateralorbitofrontal\_6)  
643 0.97585 (rh.lateralorbitofrontal\_6)(rh.parstriangularis\_1)  
644 0.97585 (rh.postcentral\_1)(rh.precentral\_7)  
645 0.97585 (rh.rostralmiddlefrontal\_12)(rh.rostralmiddlefrontal\_8)  
646 0.97585 (rh.superiorfrontal\_2)(rh.superiorfrontal\_4)(rh.superiorfrontal\_5)  
647 0.97585 (rh.superiorfrontal\_2)(rh.superiorfrontal\_7)  
648 0.97585 (rh.superiortemporal\_3)(rh.superiortemporal\_9)  
649 0.97585 (rh.supramarginal\_7)(rh.supramarginal\_8)  
650 0.97585 (Right-Accumbens-area)(Right-Pallidum)(Right-Thalamus-Proper)

651 0.97585 (Right-Hippocampus)(rh.bankssts\_2)(rh.superiortemporal\_3)  
652 0.97585 (Right-Hippocampus)(rh.insula\_4)  
653 0.97585 (Right-Hippocampus)(Right-Putamen)(rh.insula\_4)  
654 0.97585 (Right-Putamen)(rh.lateralorbitofrontal\_2)(rh.lateralorbitofrontal\_6)  
655 0.97343 (Left-Caudate)(Left-Putamen)(lh.caudalanteriorcingulate\_2)(lh.posteriorcingulate\_1)  
656 0.97343 (Left-Caudate)(lh.caudalanteriorcingulate\_2)(lh.posteriorcingulate\_3)  
657 0.97343 (Left-Caudate)(lh.caudalanteriorcingulate\_2)(lh.superiorfrontal\_14)  
658 0.97343 (Left-Caudate)(lh.caudalmiddlefrontal\_4)(lh.precentral\_11)  
659 0.97343 (Left-Caudate)(lh.medialorbitofrontal\_2)  
660 0.97343 (Left-Caudate)(lh.rostralanteriorcingulate\_1)(lh.rostralanteriorcingulate\_2)  
661 0.97343 (Left-Caudate)(lh.superiorfrontal\_4)  
662 0.97343 (Left-Hippocampus)(lh.precuneus\_11)  
663 0.97343 (Left-Putamen)(lh.caudalanteriorcingulate\_2)(lh.posteriorcingulate\_1)  
664 0.97343 (Left-Putamen)(lh.caudalmiddlefrontal\_5)  
665 0.97343 (Left-Putamen)(lh.insula\_1)(lh.insula\_6)  
666 0.97343 (Left-Putamen)(lh.rostralanteriorcingulate\_1)(lh.rostralmiddlefrontal\_9)  
667 0.97343 (Left-Thalamus-Proper)(lh.precentral\_4)  
668 0.97343 (lh.caudalanteriorcingulate\_2)(lh.posteriorcingulate\_3)  
669 0.97343 (lh.fusiform\_1)(lh.fusiform\_5)(lh.lateraloccipital\_9)  
670 0.97343 (lh.fusiform\_2)(lh.lateraloccipital\_11)  
671 0.97343 (lh.insula\_1)(lh.insula\_6)  
672 0.97343 (lh.lateraloccipital\_2)(lh.pericalcarine\_3)  
673 0.97343 (lh.lateralorbitofrontal\_4)(lh.lateralorbitofrontal\_6)  
674 0.97343 (lh.lateralorbitofrontal\_6)(lh.parstriangularis\_3)  
675 0.97343 (lh.lingual\_4)(lh.pericalcarine\_3)  
676 0.97343 (lh.precentral\_12)(lh.precentral\_14)  
677 0.97343 (lh.precentral\_14)(lh.precentral\_16)  
678 0.97343 (lh.precuneus\_3)(lh.superiorparietal\_6)  
679 0.97343 (lh.rostralanteriorcingulate\_1)(lh.superiorfrontal\_4)  
680 0.97343 (lh.rostralmiddlefrontal\_9)(lh.superiorfrontal\_3)  
681 0.97343 (lh.superiorfrontal\_10)(lh.superiorfrontal\_11)(lh.superiorfrontal\_4)(lh.superiorfrontal\_7)(lh.superiorfrontal\_8)  
682 0.97343 (lh.superiorfrontal\_10)(lh.superiorfrontal\_6)  
683 0.97343 (lh.superiorfrontal\_7)(lh.superiorfrontal\_8)(lh.superiorfrontal\_9)  
684 0.97343 (lh.superiorparietal\_11)(lh.superiorparietal\_6)  
685 0.97343 (lh.superiorparietal\_3)(lh.superiorparietal\_5)  
686 0.97343 (lh.superiortemporal\_6)(lh.superiortemporal\_8)  
687 0.97343 (rh.caudalmiddlefrontal\_2)(rh.caudalmiddlefrontal\_4)  
688 0.97343 (rh.caudalmiddlefrontal\_4)(rh.rostralmiddlefrontal\_2)  
689 0.97343 (rh.inferiorparietal\_10)(rh.inferiorparietal\_9)  
690 0.97343 (rh.insula\_2)(rh.superiortemporal\_1)  
691 0.97343 (rh.isthmuscingulate\_2)(rh.precuneus\_4)  
692 0.97343 (rh.lateraloccipital\_4)(rh.lateraloccipital\_7)(rh.lateraloccipital\_8)  
693 0.97343 (rh.lingual\_2)(rh.pericalcarine\_3)  
694 0.97343 (rh.parstriangularis\_1)(rh.rostralmiddlefrontal\_12)  
695 0.97343 (rh.posteriorcingulate\_2)(rh.precentral\_13)  
696 0.97343 (rh.precentral\_11)(rh.precentral\_12)  
697 0.97343 (rh.precuneus\_4)(rh.superiorparietal\_11)  
698 0.97343 (rh.rostralmiddlefrontal\_3)(rh.rostralmiddlefrontal\_5)(rh.rostralmiddlefrontal\_8)  
699 0.97343 (rh.superiorfrontal\_10)(rh.superiorfrontal\_8)  
700 0.97343 (rh.superiorfrontal\_2)(rh.superiorfrontal\_5)(rh.superiorfrontal\_6)

701 0.97343 (rh.superiorfrontal\_4)(rh.superiorfrontal\_6)  
702 0.97343 (rh.superiorparietal\_1)(rh.superiorparietal\_2)  
703 0.97343 (rh.supramarginal\_5)(rh.supramarginal\_8)  
704 0.97343 (Right-Accumbens-area)(Right-Caudate)  
705 0.97343 (Right-Caudate)(rh.posteriorcingulate\_2)(rh.precentral\_13)  
706 0.97343 (Right-Caudate)(Right-Putamen)(rh.rostralanteriorcingulate\_1)  
707 0.97343 (Right-Hippocampus)(rh.insula\_2)(rh.insula\_4)  
708 0.97343 (Right-Hippocampus)(rh.isthmuscingulate\_2)(rh.precuneus\_2)  
709 0.97343 (Right-Hippocampus)(rh.precuneus\_3)  
710 0.97343 (Right-Hippocampus)(Right-Putamen)(rh.insula\_2)(rh.insula\_4)  
711 0.97343 (Right-Putamen)(rh.caudalmiddlefrontal\_4)(rh.parsopercularis\_4)  
712 0.97343 (Right-Putamen)(rh.insula\_7)(rh.parsopercularis\_4)  
713 0.97343 (Right-Putamen)(rh.lateralorbitofrontal\_4)  
714 0.97343 (Right-Putamen)(rh.parstriangularis\_1)(rh.rostralmiddlefrontal\_8)  
715 0.97343 (Right-Putamen)(rh.rostralanteriorcingulate\_1)  
716 0.97343 (Right-Putamen)(rh.superiorparietal\_1)  
717 0.97101 (Left-Amygdala)(Left-Hippocampus)(lh.insula\_4)  
718 0.97101 (Left-Caudate)(Left-Putamen)(lh.caudalmiddlefrontal\_4)(lh.precentral\_11)  
719 0.97101 (Left-Caudate)(Left-Putamen)(lh.parsopercularis\_3)  
720 0.97101 (Left-Caudate)(Left-Putamen)(lh.rostralmiddlefrontal\_9)  
721 0.97101 (Left-Caudate)(Left-Thalamus-Proper)(lh.precentral\_4)  
722 0.97101 (Left-Caudate)(lh.caudalmiddlefrontal\_3)(lh.caudalmiddlefrontal\_4)  
723 0.97101 (Left-Caudate)(lh.caudalmiddlefrontal\_3)(lh.rostralmiddlefrontal\_1)  
724 0.97101 (Left-Caudate)(lh.parstriangularis\_3)  
725 0.97101 (Left-Caudate)(lh.rostralmiddlefrontal\_1)(lh.rostralmiddlefrontal\_4)  
726 0.97101 (Left-Caudate)(lh.superiorfrontal\_10)  
727 0.97101 (Left-Hippocampus)(lh.insula\_4)  
728 0.97101 (Left-Putamen)(lh.insula\_1)(lh.insula\_3)  
729 0.97101 (Left-Thalamus-Proper)(lh.precentral\_7)  
730 0.97101 (Left-Thalamus-Proper)(lh.transversetemporal\_2)  
731 0.97101 (lh.caudalmiddlefrontal\_6)(lh.precentral\_11)  
732 0.97101 (lh.caudalmiddlefrontal\_6)(lh.precentral\_9)  
733 0.97101 (lh.fusiform\_2)(lh.lateraloccipital\_6)(lh.lingual\_1)  
734 0.97101 (lh.insula\_1)(lh.insula\_3)  
735 0.97101 (lh.lateralorbitofrontal\_6)(lh.rostralmiddlefrontal\_9)  
736 0.97101 (lh.parsopercularis\_1)(lh.parsopercularis\_3)(lh.parsopercularis\_4)  
737 0.97101 (lh.precuneus\_8)(lh.superiorparietal\_11)  
738 0.97101 (lh.rostralmiddlefrontal\_1)(lh.rostralmiddlefrontal\_3)  
739 0.97101 (lh.rostralmiddlefrontal\_8)(lh.superiorfrontal\_3)  
740 0.97101 (lh.superiorfrontal\_10)(lh.superiorfrontal\_4)(lh.superiorfrontal\_6)  
741 0.97101 (lh.superiorfrontal\_11)(lh.superiorfrontal\_12)(lh.superiorfrontal\_14)  
742 0.97101 (lh.superiorfrontal\_14)(lh.superiorfrontal\_8)(lh.superiorfrontal\_9)  
743 0.97101 (lh.superiorfrontal\_2)(lh.superiorfrontal\_3)(lh.superiorfrontal\_4)  
744 0.97101 (rh.bankssts\_1)(rh.bankssts\_2)  
745 0.97101 (rh.insula\_1)(rh.superiorparietal\_1)  
746 0.97101 (rh.insula\_2)(rh.precentral\_7)  
747 0.97101 (rh.lateraloccipital\_10)(rh.lateraloccipital\_8)(rh.lateraloccipital\_9)  
748 0.97101 (rh.precentral\_10)(rh.precentral\_13)(rh.precentral\_7)  
749 0.97101 (rh.precentral\_10)(rh.precentral\_13)  
750 0.97101 (rh.rostralmiddlefrontal\_11)(rh.superiorfrontal\_2)

751 0.97101 (rh.rostralmiddlefrontal\_2)(rh.rostralmiddlefrontal\_3)  
752 0.97101 (rh.rostralmiddlefrontal\_3)(rh.rostralmiddlefrontal\_4)  
753 0.97101 (rh.superiorfrontal\_10)(rh.superiorfrontal\_11)(rh.superiorfrontal\_8)  
754 0.97101 (rh.superiorfrontal\_12)(rh.superiorfrontal\_15)  
755 0.97101 (rh.supramarginal\_1)(rh.supramarginal\_8)(rh.supramarginal\_9)  
756 0.97101 (Right-Accumbens-area)(Right-Caudate)(Right-Thalamus-Proper)  
757 0.97101 (Right-Amygdala)(rh.insula\_5)(rh.insula\_6)  
758 0.97101 (Right-Amygdala)(Right-Putamen)(rh.insula\_5)(rh.insula\_6)  
759 0.97101 (Right-Caudate)(Right-Putamen)(rh.rostralanteriorcingulate\_2)  
760 0.97101 (Right-Putamen)(rh.insula\_2)(rh.precentral\_7)  
761 0.97101 (Right-Putamen)(rh.rostralanteriorcingulate\_2)  
762 0.97101 (Right-Putamen)(rh.rostralmiddlefrontal\_12)  
763 0.9686 (Left-Caudate)(Left-Putamen)(lh.caudalanteriorcingulate\_1)  
764 0.9686 (Left-Caudate)(Left-Putamen)(lh.caudalmiddlefrontal\_3)(lh.caudalmiddlefrontal\_4)  
765 0.9686 (Left-Caudate)(Left-Putamen)(lh.precentral\_11)(lh.precentral\_4)  
766 0.9686 (Left-Caudate)(lh.medialorbitofrontal\_4)  
767 0.9686 (Left-Caudate)(lh.postcentral\_8)  
768 0.9686 (Left-Caudate)(lh.rostralanteriorcingulate\_1)(lh.rostralmiddlefrontal\_9)  
769 0.9686 (Left-Hippocampus)(Left-Putamen)(Left-Thalamus-Proper)(lh.insula\_1)  
770 0.9686 (Left-Hippocampus)(Left-Putamen)(lh.insula\_1)  
771 0.9686 (Left-Hippocampus)(Left-Thalamus-Proper)(lh.insula\_1)  
772 0.9686 (Left-Hippocampus)(Left-Thalamus-Proper)(lh.isthmuscingulate\_3)  
773 0.9686 (Left-Hippocampus)(lh.insula\_1)  
774 0.9686 (Left-Hippocampus)(lh.isthmuscingulate\_3)(lh.precuneus\_11)  
775 0.9686 (Left-Hippocampus)(lh.lingual\_6)(lh.lingual\_8)  
776 0.9686 (Left-Putamen)(Left-Thalamus-Proper)(lh.insula\_1)(lh.precentral\_11)  
777 0.9686 (Left-Putamen)(Left-Thalamus-Proper)(lh.precentral\_4)  
778 0.9686 (Left-Putamen)(Left-Thalamus-Proper)(lh.precentral\_7)  
779 0.9686 (Left-Putamen)(lh.caudalanteriorcingulate\_1)  
780 0.9686 (Left-Putamen)(lh.caudalanteriorcingulate\_2)(lh.rostralanteriorcingulate\_2)  
781 0.9686 (Left-Putamen)(lh.caudalmiddlefrontal\_3)(lh.rostralmiddlefrontal\_1)  
782 0.9686 (Left-Putamen)(lh.lateralorbitofrontal\_3)  
783 0.9686 (Left-Putamen)(lh.rostralmiddlefrontal\_1)(lh.rostralmiddlefrontal\_4)  
784 0.9686 (Left-Putamen)(lh.rostralmiddlefrontal\_4)(lh.rostralmiddlefrontal\_9)  
785 0.9686 (Left-Thalamus-Proper)(lh.insula\_1)(lh.precentral\_11)  
786 0.9686 (Left-Thalamus-Proper)(lh.isthmuscingulate\_3)  
787 0.9686 (lh.bankssts\_2)(lh.bankssts\_3)  
788 0.9686 (lh.caudalanteriorcingulate\_2)(lh.superiorfrontal\_12)(lh.superiorfrontal\_14)  
789 0.9686 (lh.cuneus\_1)(lh.pericalcarine\_3)  
790 0.9686 (lh.fusiform\_2)(lh.lateraloccipital\_6)(lh.pericalcarine\_3)  
791 0.9686 (lh.lateraloccipital\_11)(lh.pericalcarine\_2)  
792 0.9686 (lh.lateralorbitofrontal\_6)(lh.parstriangularis\_3)(lh.rostralmiddlefrontal\_9)  
793 0.9686 (lh.lateralorbitofrontal\_6)(lh.rostralmiddlefrontal\_6)  
794 0.9686 (lh.medialorbitofrontal\_2)(lh.rostralanteriorcingulate\_1)  
795 0.9686 (lh.medialorbitofrontal\_2)(lh.rostralmiddlefrontal\_12)  
796 0.9686 (lh.paracentral\_1)(lh.precentral\_3)  
797 0.9686 (lh.parsopercularis\_3)(lh.rostralmiddlefrontal\_1)  
798 0.9686 (lh.parstriangularis\_3)(lh.rostralmiddlefrontal\_6)  
799 0.9686 (lh.pericalcarine\_1)(lh.pericalcarine\_2)  
800 0.9686 (lh.precentral\_11)(lh.precentral\_4)(lh.precentral\_7)



801 0.9686 (lh.precuneus\_10)(lh.precuneus\_6)(lh.precuneus\_9)  
802 0.9686 (lh.rostralmiddlefrontal\_12)(lh.rostralmiddlefrontal\_9)  
803 0.9686 (lh.rostralmiddlefrontal\_8)(lh.superiorfrontal\_3)(lh.superiorfrontal\_4)  
804 0.9686 (lh.superiorfrontal\_10)(lh.superiorfrontal\_6)(lh.superiorfrontal\_7)  
805 0.9686 (lh.superiorfrontal\_11)(lh.superiorfrontal\_7)(lh.superiorfrontal\_9)  
806 0.9686 (rh.caudalmiddlefrontal\_4)(rh.superiorfrontal\_11)  
807 0.9686 (rh.fusiform\_1)(rh.lingual\_4)  
808 0.9686 (rh.fusiform\_1)(rh.lingual\_7)  
809 0.9686 (rh.inferiorparietal\_7)(rh.inferiorparietal\_8)  
810 0.9686 (rh.lateraloccipital\_4)(rh.pericalcarine\_1)  
811 0.9686 (rh.lateraloccipital\_4)(rh.pericalcarine\_3)  
812 0.9686 (rh.lateralorbitofrontal\_2)(rh.parstriangularis\_1)  
813 0.9686 (rh.lateralorbitofrontal\_6)(rh.rostralmiddlefrontal\_12)  
814 0.9686 (rh.paracentral\_4)(rh.precentral\_13)  
815 0.9686 (rh.postcentral\_1)(rh.supramarginal\_7)  
816 0.9686 (rh.precentral\_11)(rh.precentral\_13)(rh.precentral\_7)  
817 0.9686 (rh.precentral\_11)(rh.precentral\_7)  
818 0.9686 (rh.rostralmiddlefrontal\_1)(rh.rostralmiddlefrontal\_5)  
819 0.9686 (rh.rostralmiddlefrontal\_6)(rh.rostralmiddlefrontal\_8)  
820 0.9686 (rh.superiorfrontal\_11)(rh.superiorfrontal\_5)(rh.superiorfrontal\_8)  
821 0.9686 (rh.superiorfrontal\_11)(rh.superiorfrontal\_5)  
822 0.9686 (rh.superiorfrontal\_4)(rh.superiorfrontal\_5)(rh.superiorfrontal\_6)  
823 0.9686 (rh.superiortemporal\_3)(rh.superiortemporal\_6)  
824 0.9686 (rh.supramarginal\_2)(rh.supramarginal\_8)  
825 0.9686 (Right-Accumbens-area)(Right-Caudate)(Right-Pallidum)  
826 0.9686 (Right-Caudate)(rh.caudalmiddlefrontal\_4)(rh.parsopercularis\_4)  
827 0.9686 (Right-Caudate)(rh.medialorbitofrontal\_2)  
828 0.9686 (Right-Caudate)(Right-Putamen)(rh.caudalmiddlefrontal\_4)(rh.parsopercularis\_4)  
829 0.9686 (Right-Caudate)(Right-Putamen)(Right-Thalamus-Proper)(rh.precentral\_13)  
830 0.9686 (Right-Caudate)(Right-Thalamus-Proper)(rh.precentral\_13)  
831 0.9686 (Right-Hippocampus)(rh.bankssts\_2)(rh.inferiorparietal\_4)  
832 0.9686 (Right-Putamen)(rh.lateralorbitofrontal\_6)(rh.parstriangularis\_1)  
833 0.9686 (Right-Putamen)(Right-Thalamus-Proper)(rh.precentral\_13)  
834 0.9686 (Right-Thalamus-Proper)(rh.precentral\_13)  
835 0.96618 (Left-Accumbens-area)(Left-Caudate)(Left-Pallidum)(Left-Putamen)(Left-Thalamus-Proper)  
836 0.96618 (Left-Accumbens-area)(Left-Caudate)(Left-Pallidum)(Left-Putamen)  
837 0.96618 (Left-Accumbens-area)(Left-Caudate)(Left-Putamen)(Left-Thalamus-Proper)  
838 0.96618 (Left-Accumbens-area)(Left-Caudate)(Left-Putamen)  
839 0.96618 (Left-Caudate)(Left-Putamen)(Left-Thalamus-Proper)(lh.precentral\_4)  
840 0.96618 (Left-Caudate)(Left-Putamen)(lh.caudalmiddlefrontal\_3)(lh.insula\_6)  
841 0.96618 (Left-Caudate)(Left-Putamen)(lh.caudalmiddlefrontal\_4)(lh.caudalmiddlefrontal\_6)  
842 0.96618 (Left-Caudate)(Left-Putamen)(lh.rostralmiddlefrontal\_1)  
843 0.96618 (Left-Caudate)(lh.caudalmiddlefrontal\_3)(lh.insula\_6)  
844 0.96618 (Left-Caudate)(lh.caudalmiddlefrontal\_6)(lh.precentral\_11)  
845 0.96618 (Left-Caudate)(lh.precentral\_7)  
846 0.96618 (Left-Caudate)(lh.precentral\_9)  
847 0.96618 (Left-Hippocampus)(lh.fusiform\_5)(lh.lingual\_8)  
848 0.96618 (Left-Putamen)(Left-Thalamus-Proper)(lh.insula\_2)  
849 0.96618 (Left-Putamen)(lh.caudalmiddlefrontal\_4)(lh.caudalmiddlefrontal\_5)  
850 0.96618 (Left-Putamen)(lh.lateralorbitofrontal\_1)

851 0.96618 (Left-Putamen)(lh.lateralorbitofrontal\_2)  
852 0.96618 (Left-Putamen)(lh.lateralorbitofrontal\_6)  
853 0.96618 (Left-Putamen)(lh.parsopercularis\_1)  
854 0.96618 (Left-Putamen)(lh.precentral\_4)(lh.precentral\_7)  
855 0.96618 (Left-Thalamus-Proper)(lh.insula\_2)  
856 0.96618 (lh.cuneus\_2)(lh.pericalcarine\_1)  
857 0.96618 (lh.fusiform\_1)(lh.fusiform\_2)(lh.lateraloccipital\_9)  
858 0.96618 (lh.inferiorparietal\_5)(lh.inferiorparietal\_6)  
859 0.96618 (lh.inferiorparietal\_6)(lh.inferiorparietal\_7)  
860 0.96618 (lh.inferiortemporal\_6)(lh.inferiortemporal\_7)  
861 0.96618 (lh.inferiortemporal\_7)(lh.inferiortemporal\_8)  
862 0.96618 (lh.lateraloccipital\_1)(lh.lateraloccipital\_2)  
863 0.96618 (lh.lateraloccipital\_1)(lh.pericalcarine\_1)  
864 0.96618 (lh.lateralorbitofrontal\_4)(lh.parstriangularis\_3)  
865 0.96618 (lh.medialorbitofrontal\_2)(lh.rostralmiddlefrontal\_9)  
866 0.96618 (lh.postcentral\_12)(lh.postcentral\_14)(lh.precentral\_16)  
867 0.96618 (lh.posteriorcingulate\_3)(lh.precentral\_4)  
868 0.96618 (lh.precuneus\_6)(lh.precuneus\_8)(lh.precuneus\_9)  
869 0.96618 (lh.rostralmiddlefrontal\_12)(lh.superiorfrontal\_3)  
870 0.96618 (lh.superiorfrontal\_10)(lh.superiorfrontal\_4)(lh.superiorfrontal\_6)(lh.superiorfrontal\_7)  
871 0.96618 (lh.supramarginal\_1)(lh.supramarginal\_6)  
872 0.96618 (rh.caudalmiddlefrontal\_1)(rh.caudalmiddlefrontal\_3)  
873 0.96618 (rh.fusiform\_1)(rh.lateraloccipital\_9)  
874 0.96618 (rh.fusiform\_2)(rh.lingual\_7)  
875 0.96618 (rh.inferiorparietal\_1)(rh.superiorparietal\_1)  
876 0.96618 (rh.inferiortemporal\_4)(rh.middletemporal\_4)  
877 0.96618 (rh.insula\_2)(rh.supramarginal\_9)  
878 0.96618 (rh.insula\_3)(rh.insula\_7)  
879 0.96618 (rh.paracentral\_6)(rh.postcentral\_11)  
880 0.96618 (rh.paracentral\_6)(rh.precentral\_15)  
881 0.96618 (rh.parstriangularis\_2)(rh.parstriangularis\_4)  
882 0.96618 (rh.precentral\_10)(rh.precentral\_8)  
883 0.96618 (rh.precuneus\_10)(rh.superiorparietal\_8)  
884 0.96618 (rh.superiorfrontal\_2)(rh.superiorfrontal\_5)(rh.superiorfrontal\_7)  
885 0.96618 (rh.superiorparietal\_11)(rh.superiorparietal\_12)  
886 0.96618 (rh.supramarginal\_7)(rh.supramarginal\_9)  
887 0.96618 (Right-Accumbens-area)(Right-Caudate)(Right-Pallidum)(Right-Thalamus-Proper)  
888 0.96618 (Right-Accumbens-area)(Right-Pallidum)(Right-Putamen)  
889 0.96618 (Right-Accumbens-area)(Right-Putamen)  
890 0.96618 (Right-Hippocampus)(rh.isthmuscingulate\_2)(rh.precuneus\_3)  
891 0.96618 (Right-Putamen)(rh.insula\_2)(rh.supramarginal\_9)  
892 0.96618 (Right-Putamen)(rh.insula\_3)(rh.insula\_7)  
893 0.96618 (Right-Putamen)(rh.medialorbitofrontal\_2)  
894 0.96618 (Right-Putamen)(rh.precentral\_5)(rh.precentral\_6)  
895 0.96618 (Right-Putamen)(rh.superiorfrontal\_2)  
896 0.96618 (Right-Putamen)(Right-Thalamus-Proper)(rh.insula\_1)(rh.insula\_2)  
897 0.96618 (Right-Thalamus-Proper)(rh.insula\_1)(rh.insula\_2)  
898 0.96377 (Left-Caudate)(Left-Putamen)(lh.caudalanteriorcingulate\_2)(lh.rostralanteriorcingulate\_2)  
899 0.96377 (Left-Caudate)(Left-Putamen)(lh.postcentral\_8)  
900 0.96377 (Left-Caudate)(Left-Putamen)(lh.precentral\_9)

901 0.96377 (Left-Caudate)(Left-Putamen)(lh.rostralanteriorcingulate\_1)(lh.rostralmiddlefrontal\_9)  
902 0.96377 (Left-Caudate)(lh.caudalanteriorcingulate\_1)(lh.rostralanteriorcingulate\_1)  
903 0.96377 (Left-Caudate)(lh.caudalmiddlefrontal\_4)(lh.caudalmiddlefrontal\_5)  
904 0.96377 (Left-Caudate)(lh.insula\_6)(lh.parsopercularis\_3)  
905 0.96377 (Left-Caudate)(lh.rostralmiddlefrontal\_1)(lh.rostralmiddlefrontal\_9)  
906 0.96377 (Left-Caudate)(lh.rostralmiddlefrontal\_4)(lh.rostralmiddlefrontal\_9)  
907 0.96377 (Left-Caudate)(lh.superiorfrontal\_11)(lh.superiorfrontal\_4)  
908 0.96377 (Left-Putamen)(lh.insula\_6)(lh.rostralmiddlefrontal\_1)  
909 0.96377 (Left-Putamen)(lh.lateralorbitofrontal\_4)(lh.lateralorbitofrontal\_6)  
910 0.96377 (Left-Putamen)(lh.parstriangularis\_3)(lh.rostralmiddlefrontal\_1)  
911 0.96377 (Left-Putamen)(lh.parstriangularis\_3)(lh.rostralmiddlefrontal\_9)  
912 0.96377 (lh.caudalanteriorcingulate\_1)(lh.rostralanteriorcingulate\_1)  
913 0.96377 (lh.caudalanteriorcingulate\_2)(lh.superiorfrontal\_11)(lh.superiorfrontal\_12)  
914 0.96377 (lh.caudalanteriorcingulate\_2)(lh.superiorfrontal\_11)(lh.superiorfrontal\_14)  
915 0.96377 (lh.caudalanteriorcingulate\_2)(lh.superiorfrontal\_12)(lh.superiorfrontal\_8)  
916 0.96377 (lh.cuneus\_1)(lh.superiorparietal\_13)  
917 0.96377 (lh.cuneus\_2)(lh.superiorparietal\_14)  
918 0.96377 (lh.fusiform\_2)(lh.lateraloccipital\_6)(lh.lateraloccipital\_7)  
919 0.96377 (lh.fusiform\_6)(lh.fusiform\_7)  
920 0.96377 (lh.insula\_6)(lh.parstriangularis\_3)(lh.rostralmiddlefrontal\_1)  
921 0.96377 (lh.lateraloccipital\_3)(lh.pericalcarine\_3)  
922 0.96377 (lh.lateraloccipital\_6)(lh.lingual\_1)(lh.pericalcarine\_3)  
923 0.96377 (lh.lateralorbitofrontal\_6)(lh.rostralmiddlefrontal\_6)(lh.rostralmiddlefrontal\_9)  
924 0.96377 (lh.parstriangularis\_3)(lh.rostralmiddlefrontal\_1)(lh.rostralmiddlefrontal\_4)  
925 0.96377 (lh.parstriangularis\_3)(lh.rostralmiddlefrontal\_4)  
926 0.96377 (lh.parstriangularis\_3)(lh.rostralmiddlefrontal\_6)(lh.rostralmiddlefrontal\_9)  
927 0.96377 (lh.precentral\_2)(lh.precentral\_4)  
928 0.96377 (lh.precuneus\_2)(lh.superiorparietal\_2)  
929 0.96377 (lh.precuneus\_6)(lh.superiorparietal\_5)  
930 0.96377 (lh.superiorfrontal\_11)(lh.superiorfrontal\_8)(lh.superiorfrontal\_9)  
931 0.96377 (lh.superiorfrontal\_14)(lh.superiorfrontal\_15)(lh.superiorfrontal\_17)  
932 0.96377 (lh.superiorfrontal\_14)(lh.superiorfrontal\_16)(lh.superiorfrontal\_18)  
933 0.96377 (lh.superiorfrontal\_15)(lh.superiorfrontal\_17)  
934 0.96377 (rh.caudalmiddlefrontal\_4)(rh.insula\_3)(rh.parsopercularis\_4)  
935 0.96377 (rh.fusiform\_1)(rh.fusiform\_2)(rh.fusiform\_3)  
936 0.96377 (rh.inferiorparietal\_1)(rh.inferiorparietal\_6)  
937 0.96377 (rh.inferiorparietal\_12)(rh.lateraloccipital\_8)  
938 0.96377 (rh.inferiortemporal\_4)(rh.inferiortemporal\_5)  
939 0.96377 (rh.insula\_1)(rh.insula\_2)(rh.insula\_3)  
940 0.96377 (rh.insula\_1)(rh.superiorparietal\_1)(rh.supramarginal\_9)  
941 0.96377 (rh.insula\_1)(rh.supramarginal\_1)(rh.supramarginal\_9)  
942 0.96377 (rh.insula\_4)(rh.insula\_6)  
943 0.96377 (rh.lateraloccipital\_3)(rh.pericalcarine\_4)  
944 0.96377 (rh.lateraloccipital\_8)(rh.lingual\_7)  
945 0.96377 (rh.lateralorbitofrontal\_7)(rh.medialorbitofrontal\_2)  
946 0.96377 (rh.lingual\_2)(rh.lingual\_4)  
947 0.96377 (rh.medialorbitofrontal\_2)(rh.rostralmiddlefrontal\_11)  
948 0.96377 (rh.paracentral\_4)(rh.precentral\_14)(rh.precentral\_15)  
949 0.96377 (rh.paracentral\_4)(rh.superiorfrontal\_17)  
950 0.96377 (rh.parstriangularis\_1)(rh.rostralmiddlefrontal\_12)(rh.rostralmiddlefrontal\_8)

951 0.96377 (rh.parstriangularis\_2)(rh.rostralmiddlefrontal\_3)  
952 0.96377 (rh.rostralmiddlefrontal\_10)(rh.rostralmiddlefrontal\_8)  
953 0.96377 (rh.superiorfrontal\_10)(rh.superiorfrontal\_8)(rh.superiorfrontal\_9)  
954 0.96377 (rh.superiorfrontal\_11)(rh.superiorfrontal\_16)  
955 0.96377 (rh.superiorfrontal\_12)(rh.superiorfrontal\_13)  
956 0.96377 (Right-Accumbens-area)(Right-Pallidum)(Right-Putamen)(Right-Thalamus-Proper)  
957 0.96377 (Right-Accumbens-area)(Right-Putamen)(Right-Thalamus-Proper)  
958 0.96377 (Right-Caudate)(rh.caudalmiddlefrontal\_4)(rh.caudalmiddlefrontal\_5)  
959 0.96377 (Right-Caudate)(rh.caudalmiddlefrontal\_5)  
960 0.96377 (Right-Caudate)(rh.precentral\_11)(rh.precentral\_13)  
961 0.96377 (Right-Caudate)(rh.precentral\_11)  
962 0.96377 (Right-Caudate)(rh.precentral\_5)  
963 0.96377 (Right-Caudate)(rh.superiorfrontal\_7)  
964 0.96377 (Right-Hippocampus)(rh.superiortemporal\_3)(rh.superiortemporal\_9)  
965 0.96377 (Right-Putamen)(rh.insula\_1)(rh.insula\_2)(rh.insula\_3)  
966 0.96377 (Right-Putamen)(rh.insula\_4)(rh.insula\_6)  
967 0.96377 (Right-Putamen)(rh.lateralorbitofrontal\_2)(rh.parstriangularis\_1)  
968 0.96377 (Right-Putamen)(rh.rostralmiddlefrontal\_12)(rh.rostralmiddlefrontal\_8)  
969 0.96377 (Right-Putamen)(rh.superiorparietal\_1)(rh.supramarginal\_9)  
970 0.96377 (Right-Putamen)(rh.supramarginal\_1)  
971 0.96377 (Right-Thalamus-Proper)(rh.supramarginal\_9)  
972 0.96135 (Left-Caudate)(Left-Putamen)(lh.caudalanteriorcingulate\_1)(lh.caudalanteriorcingulate\_2)  
973 0.96135 (Left-Caudate)(lh.caudalanteriorcingulate\_2)(lh.posteriorcingulate\_1)(lh.posteriorcingulate\_3)  
974 0.96135 (Left-Caudate)(lh.caudalmiddlefrontal\_4)(lh.caudalmiddlefrontal\_5)(lh.caudalmiddlefrontal\_6)  
975 0.96135 (Left-Caudate)(lh.medialorbitofrontal\_2)(lh.rostralanteriorcingulate\_1)  
976 0.96135 (Left-Caudate)(lh.posteriorcingulate\_3)(lh.precentral\_4)  
977 0.96135 (Left-Caudate)(lh.precentral\_11)(lh.precentral\_9)  
978 0.96135 (Left-Caudate)(lh.superiorfrontal\_10)(lh.superiorfrontal\_11)  
979 0.96135 (Left-Hippocampus)(Left-Putamen)(Left-Thalamus-Proper)(lh.insula\_2)  
980 0.96135 (Left-Hippocampus)(Left-Thalamus-Proper)(lh.insula\_2)  
981 0.96135 (Left-Putamen)(lh.caudalanteriorcingulate\_1)(lh.caudalanteriorcingulate\_2)  
982 0.96135 (Left-Putamen)(lh.caudalmiddlefrontal\_1)  
983 0.96135 (Left-Putamen)(lh.caudalmiddlefrontal\_5)(lh.caudalmiddlefrontal\_6)  
984 0.96135 (Left-Putamen)(lh.insula\_6)(lh.parstriangularis\_3)  
985 0.96135 (Left-Putamen)(lh.rostralanteriorcingulate\_1)(lh.rostralanteriorcingulate\_2)  
986 0.96135 (Left-Putamen)(lh.rostralmiddlefrontal\_1)(lh.rostralmiddlefrontal\_9)  
987 0.96135 (Left-Putamen)(lh.rostralmiddlefrontal\_12)  
988 0.96135 (Left-Putamen)(lh.superiorfrontal\_12)  
989 0.96135 (lh.caudalanteriorcingulate\_2)(lh.posteriorcingulate\_1)(lh.posteriorcingulate\_3)  
990 0.96135 (lh.caudalmiddlefrontal\_1)(lh.caudalmiddlefrontal\_4)  
991 0.96135 (lh.caudalmiddlefrontal\_4)(lh.caudalmiddlefrontal\_6)(lh.precentral\_11)  
992 0.96135 (lh.cuneus\_1)(lh.cuneus\_2)  
993 0.96135 (lh.fusiform\_1)(lh.fusiform\_3)  
994 0.96135 (lh.fusiform\_2)(lh.lateraloccipital\_9)(lh.lingual\_8)  
995 0.96135 (lh.fusiform\_2)(lh.lingual\_1)(lh.pericalcarine\_3)  
996 0.96135 (lh.inferiortemporal\_6)(lh.middletemporal\_3)  
997 0.96135 (lh.insula\_1)(lh.postcentral\_8)  
998 0.96135 (lh.insula\_1)(lh.supramarginal\_2)  
999 0.96135 (lh.insula\_2)(lh.superiortemporal\_3)  
1000 0.96135 (lh.insula\_6)(lh.parsopercularis\_1)(lh.parstriangularis\_3)

1001 0.96135 (lh.lateralorbitofrontal\_7)(lh.medialorbitofrontal\_2)  
1002 0.96135 (lh.lingual\_3)(lh.pericalcarine\_3)  
1003 0.96135 (lh.lingual\_8)(lh.pericalcarine\_3)  
1004 0.96135 (lh.medialorbitofrontal\_2)(lh.rostralmiddlefrontal\_12)(lh.superiorfrontal\_3)  
1005 0.96135 (lh.paracentral\_4)(lh.superiorfrontal\_16)  
1006 0.96135 (lh.parsopercularis\_1)(lh.parsopercularis\_2)(lh.parstriangularis\_3)  
1007 0.96135 (lh.parstriangularis\_3)(lh.rostralmiddlefrontal\_12)  
1008 0.96135 (lh.pericalcarine\_1)(lh.superiorparietal\_12)  
1009 0.96135 (lh.precuneus\_3)(lh.superiorparietal\_5)  
1010 0.96135 (lh.rostralmiddlefrontal\_1)(lh.rostralmiddlefrontal\_5)  
1011 0.96135 (lh.superiorfrontal\_11)(lh.superiorfrontal\_12)(lh.superiorfrontal\_14)(lh.superiorfrontal\_8)  
1012 0.96135 (lh.superiorfrontal\_14)(lh.superiorfrontal\_15)(lh.superiorfrontal\_16)(lh.superiorfrontal\_18)  
1013 0.96135 (lh.superiorfrontal\_5)(lh.superiorfrontal\_6)  
1014 0.96135 (lh.superiortemporal\_3)(lh.superiortemporal\_8)  
1015 0.96135 (lh.supramarginal\_2)(lh.supramarginal\_4)  
1016 0.96135 (rh.caudalmiddlefrontal\_5)(rh.rostralmiddlefrontal\_1)  
1017 0.96135 (rh.cuneus\_3)(rh.superiorparietal\_13)  
1018 0.96135 (rh.inferiorparietal\_10)(rh.inferiorparietal\_12)(rh.inferiorparietal\_8)  
1019 0.96135 (rh.inferiortemporal\_4)(rh.middletemporal\_6)  
1020 0.96135 (rh.inferiortemporal\_5)(rh.inferiortemporal\_6)  
1021 0.96135 (rh.isthmuscingulate\_2)(rh.precuneus\_3)(rh.precuneus\_7)  
1022 0.96135 (rh.lateraloccipital\_3)(rh.pericalcarine\_3)  
1023 0.96135 (rh.lateraloccipital\_4)(rh.superiorparietal\_11)  
1024 0.96135 (rh.lateraloccipital\_5)(rh.lateraloccipital\_7)  
1025 0.96135 (rh.lateralorbitofrontal\_6)(rh.lateralorbitofrontal\_7)  
1026 0.96135 (rh.posteriorcingulate\_1)(rh.posteriorcingulate\_3)  
1027 0.96135 (Right-Caudate)(rh.medialorbitofrontal\_3)  
1028 0.96135 (Right-Caudate)(rh.posteriorcingulate\_1)(rh.posteriorcingulate\_3)  
1029 0.96135 (Right-Caudate)(Right-Putamen)(rh.precentral\_5)  
1030 0.96135 (Right-Hippocampus)(Right-Thalamus-Proper)(rh.isthmuscingulate\_2)  
1031 0.96135 (Right-Putamen)(rh.caudalmiddlefrontal\_4)(rh.insula\_3)(rh.parsopercularis\_4)  
1032 0.96135 (Right-Putamen)(rh.parstriangularis\_1)(rh.rostralmiddlefrontal\_12)  
1033 0.96135 (Right-Putamen)(rh.rostralmiddlefrontal\_5)  
1034 0.96135 (Right-Putamen)(Right-Thalamus-Proper)(rh.supramarginal\_9)  
1035 0.96135 (Right-Thalamus-Proper)(rh.isthmuscingulate\_2)  
1036 0.95894 (Left-Caudate)(Left-Putamen)(lh.caudalmiddlefrontal\_5)  
1037 0.95894 (Left-Caudate)(Left-Putamen)(lh.insula\_6)(lh.parsopercularis\_3)  
1038 0.95894 (Left-Caudate)(Left-Putamen)(lh.posteriorcingulate\_3)  
1039 0.95894 (Left-Caudate)(Left-Putamen)(lh.precentral\_11)(lh.precentral\_9)  
1040 0.95894 (Left-Caudate)(Left-Putamen)(lh.rostralanteriorcingulate\_1)(lh.rostralanteriorcingulate\_2)  
1041 0.95894 (Left-Caudate)(lh.medialorbitofrontal\_5)  
1042 0.95894 (Left-Hippocampus)(lh.entorhinal\_1)  
1043 0.95894 (Left-Hippocampus)(lh.superiortemporal\_6)  
1044 0.95894 (Left-Putamen)(lh.lateralorbitofrontal\_7)  
1045 0.95894 (Left-Putamen)(lh.medialorbitofrontal\_2)  
1046 0.95894 (Left-Putamen)(lh.parsopercularis\_1)(lh.parsopercularis\_3)  
1047 0.95894 (Left-Putamen)(lh.posteriorcingulate\_3)  
1048 0.95894 (Left-Putamen)(lh.rostralmiddlefrontal\_12)(lh.rostralmiddlefrontal\_9)  
1049 0.95894 (Left-Putamen)(lh.superiorfrontal\_11)  
1050 0.95894 (lh.caudalanteriorcingulate\_1)(lh.rostralanteriorcingulate\_1)(lh.rostralanteriorcingulate\_2)

1051 0.95894 (lh.caudalmiddlefrontal\_1)(lh.caudalmiddlefrontal\_5)  
1052 0.95894 (lh.caudalmiddlefrontal\_2)(lh.caudalmiddlefrontal\_3)  
1053 0.95894 (lh.fusiform\_1)(lh.lateraloccipital\_9)(lh.lingual\_8)  
1054 0.95894 (lh.fusiform\_2)(lh.fusiform\_3)  
1055 0.95894 (lh.fusiform\_2)(lh.lingual\_4)  
1056 0.95894 (lh.fusiform\_5)(lh.inferiortemporal\_8)  
1057 0.95894 (lh.fusiform\_7)(lh.inferiortemporal\_3)  
1058 0.95894 (lh.inferiorparietal\_1)(lh.lateraloccipital\_6)  
1059 0.95894 (lh.inferiorparietal\_10)(lh.inferiorparietal\_9)  
1060 0.95894 (lh.inferiorparietal\_4)(lh.lateraloccipital\_9)  
1061 0.95894 (lh.inferiorparietal\_6)(lh.inferiorparietal\_8)(lh.inferiorparietal\_9)  
1062 0.95894 (lh.inferiortemporal\_3)(lh.middletemporal\_4)  
1063 0.95894 (lh.insula\_1)(lh.supramarginal\_9)  
1064 0.95894 (lh.isthmuscingulate\_3)(lh.lingual\_6)  
1065 0.95894 (lh.isthmuscingulate\_3)(lh.precuneus\_10)(lh.precuneus\_11)  
1066 0.95894 (lh.lateraloccipital\_2)(lh.pericalcarine\_2)(lh.pericalcarine\_3)  
1067 0.95894 (lh.lateraloccipital\_7)(lh.pericalcarine\_3)  
1068 0.95894 (lh.lateralorbitofrontal\_4)(lh.lateralorbitofrontal\_6)(lh.parstriangularis\_3)  
1069 0.95894 (lh.lateralorbitofrontal\_4)(lh.rostralmiddlefrontal\_9)  
1070 0.95894 (lh.lateralorbitofrontal\_6)(lh.rostralmiddlefrontal\_12)  
1071 0.95894 (lh.lateralorbitofrontal\_7)(lh.rostralmiddlefrontal\_12)  
1072 0.95894 (lh.lingual\_1)(lh.lingual\_3)  
1073 0.95894 (lh.lingual\_1)(lh.pericalcarine\_2)(lh.pericalcarine\_3)  
1074 0.95894 (lh.medialorbitofrontal\_2)(lh.rostralmiddlefrontal\_9)(lh.superiorfrontal\_3)  
1075 0.95894 (lh.medialorbitofrontal\_2)(lh.superiorfrontal\_1)(lh.superiorfrontal\_3)  
1076 0.95894 (lh.medialorbitofrontal\_2)(lh.superiorfrontal\_1)  
1077 0.95894 (lh.middletemporal\_4)(lh.middletemporal\_5)  
1078 0.95894 (lh.paracentral\_1)(lh.paracentral\_4)(lh.precentral\_3)  
1079 0.95894 (lh.paracentral\_3)(lh.paracentral\_4)  
1080 0.95894 (lh.paracentral\_5)(lh.postcentral\_3)  
1081 0.95894 (lh.paracentral\_5)(lh.precentral\_3)  
1082 0.95894 (lh.paracentral\_5)(lh.superiorfrontal\_15)  
1083 0.95894 (lh.parsopercularis\_4)(lh.precentral\_16)  
1084 0.95894 (lh.postcentral\_8)(lh.precentral\_7)  
1085 0.95894 (lh.precuneus\_6)(lh.superiorparietal\_11)  
1086 0.95894 (lh.rostralanterocingulate\_1)(lh.superiorfrontal\_3)  
1087 0.95894 (lh.rostralmiddlefrontal\_1)(lh.rostralmiddlefrontal\_3)(lh.rostralmiddlefrontal\_4)  
1088 0.95894 (lh.rostralmiddlefrontal\_4)(lh.superiorfrontal\_10)  
1089 0.95894 (lh.superiorfrontal\_4)(lh.superiorfrontal\_5)(lh.superiorfrontal\_6)  
1090 0.95894 (rh.caudalmiddlefrontal\_4)(rh.rostralmiddlefrontal\_3)  
1091 0.95894 (rh.caudalmiddlefrontal\_4)(rh.superiorfrontal\_7)  
1092 0.95894 (rh.fusiform\_1)(rh.fusiform\_2)(rh.fusiform\_3)(rh.lateraloccipital\_10)  
1093 0.95894 (rh.fusiform\_1)(rh.lingual\_5)(rh.lingual\_7)  
1094 0.95894 (rh.inferiorparietal\_10)(rh.lateraloccipital\_10)(rh.lateraloccipital\_8)  
1095 0.95894 (rh.inferiorparietal\_11)(rh.lateraloccipital\_8)  
1096 0.95894 (rh.inferiorparietal\_12)(rh.lateraloccipital\_4)  
1097 0.95894 (rh.inferiorparietal\_12)(rh.superiorparietal\_11)  
1098 0.95894 (rh.lateraloccipital\_8)(rh.pericalcarine\_1)  
1099 0.95894 (rh.lateralorbitofrontal\_2)(rh.lateralorbitofrontal\_6)(rh.parstriangularis\_1)  
1100 0.95894 (rh.lateralorbitofrontal\_2)(rh.rostralmiddlefrontal\_12)

1101 0.95894 (rh.lateralorbitofrontal\_5)(rh.lateralorbitofrontal\_7)  
1102 0.95894 (rh.lateralorbitofrontal\_6)(rh.parstriangularis\_1)(rh.rostralmiddlefrontal\_12)  
1103 0.95894 (rh.paracentral\_4)(rh.paracentral\_5)  
1104 0.95894 (rh.parstriangularis\_4)(rh.rostralmiddlefrontal\_12)  
1105 0.95894 (rh.parstriangularis\_4)(rh.rostralmiddlefrontal\_3)  
1106 0.95894 (rh.precentral\_5)(rh.precentral\_7)  
1107 0.95894 (rh.precuneus\_4)(rh.superiorparietal\_7)  
1108 0.95894 (rh.precuneus\_7)(rh.superiorparietal\_8)  
1109 0.95894 (rh.rostralmiddlefrontal\_12)(rh.superiorfrontal\_2)  
1110 0.95894 (rh.rostralmiddlefrontal\_3)(rh.rostralmiddlefrontal\_6)  
1111 0.95894 (rh.superiorfrontal\_10)(rh.superiorfrontal\_11)(rh.superiorfrontal\_8)(rh.superiorfrontal\_9)  
1112 0.95894 (rh.superiorfrontal\_11)(rh.superiorfrontal\_5)(rh.superiorfrontal\_8)(rh.superiorfrontal\_9)  
1113 0.95894 (rh.superiorfrontal\_11)(rh.superiorfrontal\_5)(rh.superiorfrontal\_9)  
1114 0.95894 (rh.superiorfrontal\_2)(rh.superiorfrontal\_6)(rh.superiorfrontal\_7)  
1115 0.95894 (rh.superiortemporal\_1)(rh.superiortemporal\_3)  
1116 0.95894 (Right-Caudate)(Right-Putamen)(rh.medialorbitofrontal\_2)  
1117 0.95894 (Right-Hippocampus)(rh.fusiform\_8)  
1118 0.95894 (Right-Putamen)(rh.caudalmiddlefrontal\_4)(rh.caudalmiddlefrontal\_5)  
1119 0.95894 (Right-Putamen)(rh.caudalmiddlefrontal\_5)  
1120 0.95894 (Right-Putamen)(rh.lateralorbitofrontal\_6)(rh.rostralmiddlefrontal\_12)  
1121 0.95894 (Right-Putamen)(rh.lateralorbitofrontal\_7)  
1122 0.95652 (Left-Amygdala)(lh.temporalpole\_1)  
1123 0.95652 (Left-Caudate)(Left-Putamen)(Left-Thalamus-Proper)(lh.insula\_1)(lh.precentral\_11)  
1124 0.95652 (Left-Caudate)(Left-Putamen)(lh.medialorbitofrontal\_2)  
1125 0.95652 (Left-Caudate)(Left-Putamen)(lh.precentral\_7)  
1126 0.95652 (Left-Caudate)(Left-Putamen)(lh.superiorfrontal\_11)  
1127 0.95652 (Left-Caudate)(Left-Putamen)(lh.superiorfrontal\_12)  
1128 0.95652 (Left-Caudate)(Left-Thalamus-Proper)(lh.insula\_1)(lh.precentral\_11)  
1129 0.95652 (Left-Caudate)(lh.caudalmiddlefrontal\_1)(lh.caudalmiddlefrontal\_3)  
1130 0.95652 (Left-Caudate)(lh.paracentral\_5)(lh.precentral\_4)  
1131 0.95652 (Left-Caudate)(lh.parstriangularis\_3)(lh.rostralmiddlefrontal\_1)  
1132 0.95652 (Left-Hippocampus)(lh.parahippocampal\_1)  
1133 0.95652 (Left-Putamen)(lh.caudalmiddlefrontal\_6)(lh.precentral\_11)  
1134 0.95652 (Left-Putamen)(lh.caudalmiddlefrontal\_6)(lh.precentral\_9)  
1135 0.95652 (Left-Putamen)(lh.lateralorbitofrontal\_4)(lh.rostralmiddlefrontal\_9)  
1136 0.95652 (Left-Putamen)(lh.lateralorbitofrontal\_6)(lh.rostralmiddlefrontal\_9)  
1137 0.95652 (Left-Thalamus-Proper)(lh.isthmuscingulate\_2)  
1138 0.95652 (lh.caudalmiddlefrontal\_3)(lh.caudalmiddlefrontal\_5)  
1139 0.95652 (lh.fusiform\_5)(lh.lateraloccipital\_9)(lh.lingual\_8)  
1140 0.95652 (lh.inferiortemporal\_8)(lh.lateraloccipital\_9)  
1141 0.95652 (lh.isthmuscingulate\_2)(lh.precuneus\_10)  
1142 0.95652 (lh.lateraloccipital\_1)(lh.pericalcarine\_2)  
1143 0.95652 (lh.lateralorbitofrontal\_6)(lh.lateralorbitofrontal\_7)  
1144 0.95652 (lh.lateralorbitofrontal\_6)(lh.parsorbitalis\_1)  
1145 0.95652 (lh.lateralorbitofrontal\_7)(lh.parstriangularis\_3)  
1146 0.95652 (lh.lingual\_6)(lh.pericalcarine\_3)  
1147 0.95652 (lh.medialorbitofrontal\_2)(lh.rostralmiddlefrontal\_12)(lh.rostralmiddlefrontal\_9)  
1148 0.95652 (lh.parstriangularis\_3)(lh.rostralmiddlefrontal\_12)(lh.rostralmiddlefrontal\_9)  
1149 0.95652 (lh.precuneus\_8)(lh.precuneus\_9)(lh.superiorparietal\_11)  
1150 0.95652 (lh.rostralanteriorcingulate\_1)(lh.rostralanteriorcingulate\_2)(lh.superiorfrontal\_4)

1151 0.95652 (lh.rostralanteriorcingulate\_1)(lh.rostralmiddlefrontal\_12)  
1152 0.95652 (lh.rostralmiddlefrontal\_4)(lh.rostralmiddlefrontal\_5)  
1153 0.95652 (lh.superiorfrontal\_11)(lh.superiorfrontal\_14)(lh.superiorfrontal\_9)  
1154 0.95652 (rh.caudalanteriorcingulate\_3)(rh.posteriorcingulate\_1)  
1155 0.95652 (rh.fusiform\_1)(rh.lateraloccipital\_10)(rh.lateraloccipital\_9)  
1156 0.95652 (rh.fusiform\_2)(rh.lingual\_5)  
1157 0.95652 (rh.inferiorparietal\_10)(rh.inferiorparietal\_11)  
1158 0.95652 (rh.isthmuscingulate\_2)(rh.precuneus\_4)(rh.precuneus\_7)  
1159 0.95652 (rh.lateraloccipital\_4)(rh.lingual\_2)  
1160 0.95652 (rh.lateralorbitofrontal\_7)(rh.rostralmiddlefrontal\_12)  
1161 0.95652 (rh.paracentral\_3)(rh.precentral\_15)  
1162 0.95652 (rh.parsopercularis\_4)(rh.parstriangularis\_2)  
1163 0.95652 (rh.parstriangularis\_1)(rh.parstriangularis\_2)(rh.parstriangularis\_4)  
1164 0.95652 (rh.parstriangularis\_1)(rh.rostralmiddlefrontal\_3)(rh.rostralmiddlefrontal\_8)  
1165 0.95652 (rh.pericalcarine\_2)(rh.superiorparietal\_11)  
1166 0.95652 (rh.precentral\_5)(rh.precentral\_8)  
1167 0.95652 (rh.precuneus\_7)(rh.superiorparietal\_1)  
1168 0.95652 (rh.superiorparietal\_1)(rh.supramarginal\_1)(rh.supramarginal\_9)  
1169 0.95652 (rh.superiorparietal\_1)(rh.supramarginal\_8)  
1170 0.95652 (rh.superiorparietal\_10)(rh.superiorparietal\_8)  
1171 0.95652 (Right-Accumbens-area)(Right-Caudate)(Right-Pallidum)(Right-Putamen)  
1172 0.95652 (Right-Accumbens-area)(Right-Caudate)(Right-Putamen)  
1173 0.95652 (Right-Amygdala)(rh.inferiortemporal\_1)  
1174 0.95652 (Right-Caudate)(rh.caudalanteriorcingulate\_3)(rh.posteriorcingulate\_1)  
1175 0.95652 (Right-Caudate)(rh.precentral\_13)(rh.precentral\_7)  
1176 0.95652 (Right-Caudate)(rh.precentral\_7)  
1177 0.95652 (Right-Caudate)(Right-Putamen)(rh.precentral\_7)  
1178 0.95652 (Right-Hippocampus)(rh.middletemporal\_4)  
1179 0.95652 (Right-Putamen)(rh.insula\_1)(rh.supramarginal\_1)  
1180 0.95652 (Right-Putamen)(rh.lateralorbitofrontal\_6)(rh.lateralorbitofrontal\_7)  
1181 0.95652 (Right-Putamen)(rh.lateralorbitofrontal\_7)(rh.medialorbitofrontal\_2)  
1182 0.95652 (Right-Putamen)(rh.postcentral\_1)(rh.precentral\_7)  
1183 0.95652 (Right-Putamen)(rh.precentral\_10)(rh.precentral\_13)(rh.precentral\_7)  
1184 0.95652 (Right-Putamen)(rh.precentral\_10)(rh.precentral\_13)  
1185 0.95652 (Right-Putamen)(rh.precentral\_11)(rh.precentral\_7)  
1186 0.95652 (Right-Putamen)(rh.precentral\_5)(rh.precentral\_7)  
1187 0.95411 (Left-Caudate)(Left-Putamen)(lh.caudalmiddlefrontal\_3)(lh.rostralmiddlefrontal\_1)  
1188 0.95411 (Left-Caudate)(Left-Putamen)(lh.parstriangularis\_3)  
1189 0.95411 (Left-Caudate)(lh.caudalanteriorcingulate\_1)(lh.rostralanteriorcingulate\_1)(lh.rostralanteriorcingulate\_2)  
1190 0.95411 (Left-Caudate)(lh.caudalanteriorcingulate\_2)(lh.superiorfrontal\_11)(lh.superiorfrontal\_12)  
1191 0.95411 (Left-Caudate)(lh.insula\_6)(lh.rostralmiddlefrontal\_1)  
1192 0.95411 (Left-Caudate)(lh.lateralorbitofrontal\_7)  
1193 0.95411 (Left-Caudate)(lh.precentral\_11)(lh.precentral\_7)  
1194 0.95411 (Left-Caudate)(lh.superiorfrontal\_11)(lh.superiorfrontal\_14)  
1195 0.95411 (Left-Caudate)(Right-Caudate)(lh.caudalanteriorcingulate\_1)  
1196 0.95411 (Left-Hippocampus)(lh.superiortemporal\_8)  
1197 0.95411 (Left-Putamen)(lh.medialorbitofrontal\_5)  
1198 0.95411 (Left-Putamen)(lh.parsopercularis\_1)(lh.parstriangularis\_3)  
1199 0.95411 (Left-Putamen)(lh.precentral\_11)(lh.precentral\_4)(lh.precentral\_7)  
1200 0.95411 (Left-Putamen)(lh.superiorfrontal\_4)



1201 0.95411 (lh.bankssts\_2)(lh.inferiortemporal\_6)  
1202 0.95411 (lh.caudalanteriorcingulate\_2)(lh.superiorfrontal\_11)(lh.superiorfrontal\_14)(lh.superiorfrontal\_8)  
1203 0.95411 (lh.caudalanteriorcingulate\_2)(lh.superiorfrontal\_12)(lh.superiorfrontal\_14)(lh.superiorfrontal\_8)  
1204 0.95411 (lh.caudalmiddlefrontal\_3)(lh.insula\_6)(lh.rostralmiddlefrontal\_1)  
1205 0.95411 (lh.caudalmiddlefrontal\_3)(lh.superiorfrontal\_11)  
1206 0.95411 (lh.cuneus\_1)(lh.pericalcarine\_1)  
1207 0.95411 (lh.fusiform\_2)(lh.lateraloccipital\_11)(lh.lateraloccipital\_6)  
1208 0.95411 (lh.fusiform\_3)(lh.fusiform\_5)  
1209 0.95411 (lh.inferiorparietal\_1)(lh.inferiorparietal\_3)  
1210 0.95411 (lh.lateraloccipital\_11)(lh.lateraloccipital\_6)(lh.lingual\_1)  
1211 0.95411 (lh.lateralorbitofrontal\_6)(lh.parstriangularis\_3)(lh.rostralmiddlefrontal\_12)  
1212 0.95411 (lh.lateralorbitofrontal\_7)(lh.medialorbitofrontal\_2)(lh.rostralmiddlefrontal\_12)  
1213 0.95411 (lh.paracentral\_4)(lh.paracentral\_5)(lh.precentral\_3)  
1214 0.95411 (lh.parsopercularis\_1)(lh.parsopercularis\_3)(lh.rostralmiddlefrontal\_1)  
1215 0.95411 (lh.parstriangularis\_3)(lh.rostralmiddlefrontal\_1)(lh.rostralmiddlefrontal\_4)(lh.rostralmiddlefrontal\_9)  
1216 0.95411 (lh.parstriangularis\_3)(lh.rostralmiddlefrontal\_4)(lh.rostralmiddlefrontal\_9)  
1217 0.95411 (lh.precuneus\_9)(lh.superiorparietal\_12)  
1218 0.95411 (lh.rostralmiddlefrontal\_1)(lh.rostralmiddlefrontal\_6)  
1219 0.95411 (lh.rostralmiddlefrontal\_12)(lh.rostralmiddlefrontal\_9)(lh.superiorfrontal\_3)  
1220 0.95411 (lh.superiorparietal\_11)(lh.superiorparietal\_5)  
1221 0.95411 (rh.caudalmiddlefrontal\_4)(rh.superiorfrontal\_11)(rh.superiorfrontal\_13)  
1222 0.95411 (rh.inferiorparietal\_12)(rh.precuneus\_2)  
1223 0.95411 (rh.inferiortemporal\_2)(rh.middletemporal\_7)  
1224 0.95411 (rh.inferiortemporal\_7)(rh.middletemporal\_2)  
1225 0.95411 (rh.insula\_3)(rh.precentral\_6)  
1226 0.95411 (rh.insula\_3)(rh.precentral\_7)  
1227 0.95411 (rh.isthmuscingulate\_1)(rh.isthmuscingulate\_2)  
1228 0.95411 (rh.lateralorbitofrontal\_6)(rh.parstriangularis\_4)  
1229 0.95411 (rh.medialorbitofrontal\_2)(rh.rostralmiddlefrontal\_13)  
1230 0.95411 (rh.middletemporal\_4)(rh.middletemporal\_7)  
1231 0.95411 (rh.posteriorcingulate\_1)(rh.posteriorcingulate\_2)  
1232 0.95411 (rh.precuneus\_3)(rh.precuneus\_4)  
1233 0.95411 (rh.rostralmiddlefrontal\_12)(rh.rostralmiddlefrontal\_7)  
1234 0.95411 (rh.rostralmiddlefrontal\_9)(rh.superiorfrontal\_2)  
1235 0.95411 (rh.superiorfrontal\_13)(rh.superiorfrontal\_14)  
1236 0.95411 (rh.superiorfrontal\_14)(rh.superiorfrontal\_17)  
1237 0.95411 (rh.superiorparietal\_10)(rh.superiorparietal\_11)  
1238 0.95411 (rh.supramarginal\_6)(rh.supramarginal\_7)  
1239 0.95411 (Right-Accumbens-area)(Right-Caudate)(Right-Pallidum)(Right-Putamen)(Right-Thalamus-Proper)  
1240 0.95411 (Right-Accumbens-area)(Right-Caudate)(Right-Putamen)(Right-Thalamus-Proper)  
1241 0.95411 (Right-Caudate)(lh.caudalanteriorcingulate\_1)  
1242 0.95411 (Right-Caudate)(rh.caudalmiddlefrontal\_4)(rh.superiorfrontal\_11)  
1243 0.95411 (Right-Caudate)(rh.posteriorcingulate\_1)(rh.posteriorcingulate\_2)  
1244 0.95411 (Right-Caudate)(rh.supramarginal\_9)  
1245 0.95411 (Right-Caudate)(Right-Putamen)(rh.precentral\_13)(rh.precentral\_7)  
1246 0.95411 (Right-Hippocampus)(rh parahippocampal\_3)  
1247 0.95411 (Right-Hippocampus)(Right-Thalamus-Proper)(rh.supramarginal\_9)  
1248 0.95411 (Right-Putamen)(rh.insula\_3)(rh.precentral\_7)  
1249 0.95411 (Right-Putamen)(rh.lateralorbitofrontal\_2)(rh.lateralorbitofrontal\_6)(rh.parstriangularis\_1)  
1250 0.95411 (Right-Putamen)(rh.lateralorbitofrontal\_2)(rh.rostralmiddlefrontal\_12)

1251 0.95411 (Right-Putamen)(rh.precentral\_11)(rh.precentral\_13)(rh.precentral\_7)  
1252 0.95411 (Right-Putamen)(rh.rostralmiddlefrontal\_8)(rh.superiorfrontal\_2)  
1253 0.95411 (Right-Thalamus-Proper)(rh.insula\_1)(rh.supramarginal\_9)  
1254 0.95169 (Left-Caudate)(Left-Putamen)(lh.caudalmiddlefrontal\_1)  
1255 0.95169 (Left-Caudate)(Left-Putamen)(lh.caudalmiddlefrontal\_6)(lh.precentral\_11)  
1256 0.95169 (Left-Caudate)(lh.medialorbitofrontal\_2)(lh.rostralmiddlefrontal\_9)  
1257 0.95169 (Left-Hippocampus)(lh.transversetemporal\_2)  
1258 0.95169 (Left-Putamen)(lh.caudalmiddlefrontal\_4)(lh.caudalmiddlefrontal\_5)(lh.caudalmiddlefrontal\_6)  
1259 0.95169 (Left-Putamen)(lh.insula\_1)(lh.postcentral\_8)  
1260 0.95169 (lh.fusiform\_4)(lh.fusiform\_6)  
1261 0.95169 (lh.fusiform\_7)(lh.inferiortemporal\_6)  
1262 0.95169 (lh.inferiorparietal\_1)(lh.lateraloccipital\_7)  
1263 0.95169 (lh.insula\_6)(lh.parsopercularis\_1)(lh.rostralmiddlefrontal\_1)  
1264 0.95169 (lh.insula\_6)(lh.parsopercularis\_3)(lh.rostralmiddlefrontal\_1)  
1265 0.95169 (lh.insula\_6)(lh.precentral\_14)  
1266 0.95169 (lh.isthmuscingulate\_3)(lh.precuneus\_6)  
1267 0.95169 (lh.lateralorbitofrontal\_4)(lh.lateralorbitofrontal\_6)(lh.rostralmiddlefrontal\_9)  
1268 0.95169 (lh.lateralorbitofrontal\_6)(lh.parstriangularis\_1)  
1269 0.95169 (lh.lateralorbitofrontal\_6)(lh.parstriangularis\_3)(lh.rostralmiddlefrontal\_6)  
1270 0.95169 (lh.lingual\_3)(lh.lingual\_4)  
1271 0.95169 (lh.paracentral\_4)(lh.superiorfrontal\_15)  
1272 0.95169 (lh.parsopercularis\_1)(lh.parsopercularis\_3)(lh.parstriangularis\_3)  
1273 0.95169 (lh.parsopercularis\_3)(lh.parstriangularis\_3)  
1274 0.95169 (lh.parstriangularis\_1)(lh.parstriangularis\_3)  
1275 0.95169 (lh.posteriorcingulate\_3)(lh.superiorfrontal\_14)  
1276 0.95169 (lh.precentral\_12)(lh.precentral\_16)  
1277 0.95169 (lh.precuneus\_10)(lh.precuneus\_11)(lh.precuneus\_9)  
1278 0.95169 (lh.precuneus\_11)(lh.precuneus\_6)  
1279 0.95169 (lh.precuneus\_3)(lh.precuneus\_6)(lh.superiorparietal\_6)  
1280 0.95169 (lh.rostralanteriorcingulate\_2)(lh.rostralmiddlefrontal\_4)  
1281 0.95169 (lh.rostralmiddlefrontal\_8)(lh.rostralmiddlefrontal\_9)  
1282 0.95169 (lh.rostralmiddlefrontal\_9)(lh.superiorfrontal\_4)  
1283 0.95169 (lh.superiorparietal\_5)(lh.superiorparietal\_7)  
1284 0.95169 (rh.caudalanteriorcingulate\_1)(rh.caudalanteriorcingulate\_2)  
1285 0.95169 (rh.fusiform\_1)(rh.lateraloccipital\_8)(rh.lateraloccipital\_9)  
1286 0.95169 (rh.inferiorparietal\_1)(rh.superiorparietal\_7)  
1287 0.95169 (rh.inferiortemporal\_5)(rh.middletemporal\_2)  
1288 0.95169 (rh.insula\_1)(rh.precentral\_11)  
1289 0.95169 (rh.insula\_4)(rh.insula\_5)  
1290 0.95169 (rh.paracentral\_4)(rh.paracentral\_5)(rh.precentral\_15)  
1291 0.95169 (rh.paracentral\_4)(rh.superiorfrontal\_16)(rh.superiorfrontal\_17)  
1292 0.95169 (rh.parstriangularis\_1)(rh.parstriangularis\_3)  
1293 0.95169 (rh.precentral\_12)(rh.precentral\_13)  
1294 0.95169 (rh.precuneus\_1)(rh.superiorparietal\_10)  
1295 0.95169 (rh.rostralmiddlefrontal\_10)(rh.rostralmiddlefrontal\_8)(rh.superiorfrontal\_2)  
1296 0.95169 (rh.rostralmiddlefrontal\_5)(rh.rostralmiddlefrontal\_6)  
1297 0.95169 (rh.superiorfrontal\_12)(rh.superiorfrontal\_16)  
1298 0.95169 (rh.superiorfrontal\_2)(rh.superiorfrontal\_5)(rh.superiorfrontal\_6)(rh.superiorfrontal\_7)  
1299 0.95169 (rh.superiortemporal\_6)(rh.superiortemporal\_7)  
1300 0.95169 (Right-Caudate)(rh.caudalanteriorcingulate\_1)(rh.caudalanteriorcingulate\_2)

1301 0.95169 (Right-Caudate)(Right-Pallidum)(rh.precentral\_13)  
1302 0.95169 (Right-Caudate)(Right-Pallidum)(Right-Putamen)(rh.precentral\_13)  
1303 0.95169 (Right-Caudate)(Right-Putamen)(rh.posteriorcingulate\_2)(rh.precentral\_13)  
1304 0.95169 (Right-Caudate)(Right-Putamen)(rh.precentral\_11)  
1305 0.95169 (Right-Caudate)(Right-Putamen)(rh.supramarginal\_9)  
1306 0.95169 (Right-Hippocampus)(rh.insula\_2)(rh.superiortemporal\_1)  
1307 0.95169 (Right-Hippocampus)(Right-Putamen)(Right-Thalamus-Proprius)(rh.supramarginal\_9)  
1308 0.95169 (Right-Pallidum)(rh.precentral\_13)  
1309 0.95169 (Right-Pallidum)(Right-Putamen)(rh.precentral\_13)  
1310 0.95169 (Right-Putamen)(rh.posteriorcingulate\_2)(rh.precentral\_13)  
1311 0.95169 (Right-Putamen)(rh.rostralmiddlefrontal\_3)  
1312 0.95169 (Right-Putamen)(rh.rostralmiddlefrontal\_5)(rh.rostralmiddlefrontal\_8)  
1313 0.95169 (Right-Putamen)(Right-Thalamus-Proprius)(rh.insula\_1)(rh.supramarginal\_9)  
1314 0.94928 (Left-Caudate)(Left-Putamen)(Left-Thalamus-Proprius)(lh.posteriorcingulate\_3)  
1315 0.94928 (Left-Caudate)(Left-Putamen)(lh.insula\_1)(lh.insula\_6)  
1316 0.94928 (Left-Caudate)(Left-Putamen)(lh.rostralmiddlefrontal\_4)(lh.rostralmiddlefrontal\_9)  
1317 0.94928 (Left-Caudate)(Left-Thalamus-Proprius)(lh.precentral\_7)  
1318 0.94928 (Left-Caudate)(lh.caudalanteriorcingulate\_2)(lh.superiorfrontal\_12)(lh.superiorfrontal\_14)  
1319 0.94928 (Left-Caudate)(lh.insula\_1)(lh.insula\_6)  
1320 0.94928 (Left-Caudate)(lh.parstriangularis\_3)(lh.rostralmiddlefrontal\_9)  
1321 0.94928 (Left-Caudate)(lh.rostralanteriorcingulate\_1)(lh.superiorfrontal\_4)  
1322 0.94928 (Left-Caudate)(lh.rostralanteriorcingulate\_2)(lh.superiorfrontal\_4)  
1323 0.94928 (Left-Caudate)(lh.rostralmiddlefrontal\_1)(lh.rostralmiddlefrontal\_4)(lh.rostralmiddlefrontal\_9)  
1324 0.94928 (Left-Caudate)(lh.superiorfrontal\_8)  
1325 0.94928 (Left-Hippocampus)(lh.fusiform\_8)  
1326 0.94928 (Left-Hippocampus)(lh.lingual\_6)(lh.precuneus\_11)  
1327 0.94928 (Left-Putamen)(Left-Thalamus-Proprius)(lh.posteriorcingulate\_3)  
1328 0.94928 (Left-Putamen)(lh.lateralorbitofrontal\_4)(lh.parstriangularis\_3)  
1329 0.94928 (Left-Putamen)(lh.lateralorbitofrontal\_6)(lh.parstriangularis\_3)  
1330 0.94928 (Left-Putamen)(lh.lateralorbitofrontal\_7)(lh.rostralmiddlefrontal\_12)  
1331 0.94928 (Left-Putamen)(lh.parsopercularis\_3)(lh.rostralmiddlefrontal\_1)  
1332 0.94928 (Left-Putamen)(lh.rostralmiddlefrontal\_1)(lh.rostralmiddlefrontal\_4)(lh.rostralmiddlefrontal\_9)  
1333 0.94928 (Left-Putamen)(lh.superiorparietal\_3)  
1334 0.94928 (Left-Thalamus-Proprius)(lh.posteriorcingulate\_2)  
1335 0.94928 (lh.cuneus\_1)(lh.superiorparietal\_14)  
1336 0.94928 (lh.inferiorparietal\_1)(lh.inferiorparietal\_4)  
1337 0.94928 (lh.inferiorparietal\_1)(lh.precuneus\_11)  
1338 0.94928 (lh.inferiortemporal\_3)(lh.inferiortemporal\_6)  
1339 0.94928 (lh.insula\_1)(lh.supramarginal\_1)(lh.supramarginal\_2)  
1340 0.94928 (lh.lateralorbitofrontal\_3)(lh.lateralorbitofrontal\_4)  
1341 0.94928 (lh.lateralorbitofrontal\_6)(lh.rostralmiddlefrontal\_12)(lh.rostralmiddlefrontal\_9)  
1342 0.94928 (lh.medialorbitofrontal\_2)(lh.rostralanteriorcingulate\_1)(lh.rostralmiddlefrontal\_9)  
1343 0.94928 (lh.paracentral\_5)(lh.precentral\_2)(lh.precentral\_4)  
1344 0.94928 (lh.parstriangularis\_3)(lh.rostralanteriorcingulate\_1)  
1345 0.94928 (lh.precuneus\_2)(lh.precuneus\_3)  
1346 0.94928 (lh.precuneus\_6)(lh.superiorparietal\_5)(lh.superiorparietal\_6)  
1347 0.94928 (lh.rostralanteriorcingulate\_1)(lh.rostralmiddlefrontal\_12)(lh.rostralmiddlefrontal\_9)  
1348 0.94928 (lh.rostralmiddlefrontal\_1)(lh.rostralmiddlefrontal\_6)(lh.rostralmiddlefrontal\_9)  
1349 0.94928 (lh.rostralmiddlefrontal\_2)(lh.rostralmiddlefrontal\_3)  
1350 0.94928 (lh.superiorfrontal\_4)(lh.superiorfrontal\_5)(lh.superiorfrontal\_7)

1351 0.94928 (lh.superiorfrontal\_5)(lh.superiorfrontal\_7)  
1352 0.94928 (lh.superiortemporal\_3)(lh.superiortemporal\_6)  
1353 0.94928 (rh.bankssts\_1)(rh.middletemporal\_1)  
1354 0.94928 (rh.bankssts\_3)(rh.superiortemporal\_2)  
1355 0.94928 (rh.cuneus\_2)(rh.pericalcarine\_2)  
1356 0.94928 (rh.inferiortemporal\_5)(rh.middletemporal\_6)  
1357 0.94928 (rh.inferiortemporal\_7)(rh.lateraloccipital\_10)  
1358 0.94928 (rh.insula\_1)(rh.supramarginal\_8)(rh.supramarginal\_9)  
1359 0.94928 (rh.insula\_1)(rh.supramarginal\_8)  
1360 0.94928 (rh.insula\_5)(rh.superiortemporal\_10)  
1361 0.94928 (rh.lateraloccipital\_3)(rh.lateraloccipital\_4)(rh.superiorparietal\_11)  
1362 0.94928 (rh.lateraloccipital\_8)(rh.lingual\_2)  
1363 0.94928 (rh.lateralorbitofrontal\_2)(rh.lateralorbitofrontal\_7)  
1364 0.94928 (rh.lateralorbitofrontal\_4)(rh.lateralorbitofrontal\_5)  
1365 0.94928 (rh.lateralorbitofrontal\_6)(rh.lateralorbitofrontal\_7)(rh.rostralmiddlefrontal\_12)  
1366 0.94928 (rh.lateralorbitofrontal\_6)(rh.rostralmiddlefrontal\_13)  
1367 0.94928 (rh.middletemporal\_1)(rh.middletemporal\_2)  
1368 0.94928 (rh.paracentral\_6)(rh.postcentral\_10)  
1369 0.94928 (rh.parstriangularis\_1)(rh.parstriangularis\_4)(rh.rostralmiddlefrontal\_12)  
1370 0.94928 (rh.precuneus\_10)(rh.superiorparietal\_7)(rh.superiorparietal\_8)  
1371 0.94928 (rh.precuneus\_2)(rh.precuneus\_4)  
1372 0.94928 (rh.rostralmiddlefrontal\_12)(rh.rostralmiddlefrontal\_8)(rh.superiorfrontal\_2)  
1373 0.94928 (rh.superiorfrontal\_14)(rh.superiorfrontal\_16)  
1374 0.94928 (rh.superiortemporal\_3)(rh.transversetemporal\_1)  
1375 0.94928 (Right-Caudate)(rh.lateralorbitofrontal\_4)  
1376 0.94928 (Right-Caudate)(Right-Pallidum)(rh.caudalmiddlefrontal\_4)  
1377 0.94928 (Right-Caudate)(Right-Pallidum)(Right-Putamen)(rh.caudalmiddlefrontal\_4)  
1378 0.94928 (Right-Caudate)(Right-Putamen)(rh.lateralorbitofrontal\_4)  
1379 0.94928 (Right-Caudate)(Right-Putamen)(rh.precentral\_11)(rh.precentral\_13)  
1380 0.94928 (Right-Pallidum)(rh.caudalmiddlefrontal\_4)  
1381 0.94928 (Right-Pallidum)(Right-Putamen)(rh.caudalmiddlefrontal\_4)  
1382 0.94928 (Right-Putamen)(rh.caudalmiddlefrontal\_1)  
1383 0.94928 (Right-Putamen)(rh.insula\_1)(rh.superiorparietal\_1)  
1384 0.94928 (Right-Putamen)(rh.insula\_4)(rh.insula\_5)  
1385 0.94928 (Right-Putamen)(rh.lateralorbitofrontal\_5)  
1386 0.94928 (Right-Putamen)(rh.lateralorbitofrontal\_7)(rh.rostralmiddlefrontal\_12)  
1387 0.94928 (Right-Putamen)(rh.parsopercularis\_2)  
1388 0.94928 (Right-Putamen)(rh.parstriangularis\_1)(rh.rostralmiddlefrontal\_12)(rh.rostralmiddlefrontal\_8)  
1389 0.94928 (Right-Putamen)(rh.supramarginal\_1)(rh.supramarginal\_9)  
1390 0.94686 (Left-Caudate)(Left-Putamen)(Left-Thalamus-Proper)(lh.precentral\_7)  
1391 0.94686 (Left-Caudate)(Left-Putamen)(lh.caudalmiddlefrontal\_5)(lh.caudalmiddlefrontal\_6)  
1392 0.94686 (Left-Caudate)(Left-Putamen)(lh.medialorbitofrontal\_5)  
1393 0.94686 (Left-Caudate)(Left-Thalamus-Proper)(lh.posteriorcingulate\_2)  
1394 0.94686 (Left-Caudate)(lh.caudalmiddlefrontal\_3)(lh.superiorfrontal\_11)  
1395 0.94686 (Left-Caudate)(lh.precentral\_4)(lh.precentral\_7)  
1396 0.94686 (Left-Caudate)(lh.rostralmiddlefrontal\_4)(lh.superiorfrontal\_4)  
1397 0.94686 (Left-Caudate)(lh.superiorfrontal\_10)(lh.superiorfrontal\_4)  
1398 0.94686 (Left-Hippocampus)(lh.insula\_2)(lh.superiortemporal\_3)  
1399 0.94686 (Left-Hippocampus)(lh.parahippocampal\_2)  
1400 0.94686 (Left-Putamen)(lh.caudalanteriorcingulate\_1)(lh.rostralanteriorcingulate\_2)

1401 0.94686 (Left-Putamen)(lh.caudalanteriorcingulate\_2)(lh.superiorfrontal\_11)  
1402 0.94686 (Left-Putamen)(lh.insula\_6)(lh.parsopercularis\_1)  
1403 0.94686 (Left-Putamen)(lh.insula\_6)(lh.precentral\_14)  
1404 0.94686 (Left-Putamen)(lh.lateralorbitofrontal\_3)(lh.lateralorbitofrontal\_4)  
1405 0.94686 (Left-Putamen)(lh.medialorbitofrontal\_2)(lh.rostralanteriorcingulate\_1)  
1406 0.94686 (Left-Putamen)(lh.medialorbitofrontal\_2)(lh.rostralmiddlefrontal\_9)  
1407 0.94686 (Left-Putamen)(lh.parstriangularis\_3)(lh.rostralmiddlefrontal\_1)(lh.rostralmiddlefrontal\_9)  
1408 0.94686 (Left-Putamen)(lh.precentral\_12)  
1409 0.94686 (Left-Putamen)(lh.rostralanteriorcingulate\_1)(lh.rostralmiddlefrontal\_12)  
1410 0.94686 (lh.caudalanteriorcingulate\_2)(lh.caudalmiddlefrontal\_3)(lh.superiorfrontal\_11)  
1411 0.94686 (lh.caudalanteriorcingulate\_2)(lh.superiorfrontal\_11)(lh.superiorfrontal\_12)(lh.superiorfrontal\_8)  
1412 0.94686 (lh.caudalmiddlefrontal\_3)(lh.caudalmiddlefrontal\_4)(lh.caudalmiddlefrontal\_5)  
1413 0.94686 (lh.fusiform\_4)(lh.inferiortemporal\_8)  
1414 0.94686 (lh.insula\_1)(lh.superiorparietal\_3)  
1415 0.94686 (lh.isthmuscingulate\_2)(lh.isthmuscingulate\_3)(lh.precuneus\_10)  
1416 0.94686 (lh.lateraloccipital\_1)(lh.lateraloccipital\_3)  
1417 0.94686 (lh.lateraloccipital\_2)(lh.lateraloccipital\_6)  
1418 0.94686 (lh.lateraloccipital\_3)(lh.lingual\_1)  
1419 0.94686 (lh.lateraloccipital\_7)(lh.lateraloccipital\_9)  
1420 0.94686 (lh.lateralorbitofrontal\_4)(lh.parstriangularis\_3)(lh.rostralmiddlefrontal\_9)  
1421 0.94686 (lh.lateralorbitofrontal\_6)(lh.lateralorbitofrontal\_7)(lh.parstriangularis\_3)  
1422 0.94686 (lh.lateralorbitofrontal\_6)(lh.parstriangularis\_3)(lh.rostralmiddlefrontal\_6)(lh.rostralmiddlefrontal\_9)  
1423 0.94686 (lh.lingual\_1)(lh.lingual\_4)(lh.pericalcarine\_3)  
1424 0.94686 (lh.paracentral\_5)(lh.precuneus\_2)  
1425 0.94686 (lh.parsorbitalis\_1)(lh.parstriangularis\_3)  
1426 0.94686 (lh.parstriangularis\_3)(lh.rostralanteriorcingulate\_1)(lh.rostralmiddlefrontal\_9)  
1427 0.94686 (lh.postcentral\_14)(lh.supramarginal\_1)  
1428 0.94686 (lh.postcentral\_14)(lh.supramarginal\_4)  
1429 0.94686 (lh.posteriorcingulate\_4)(lh.superiorparietal\_2)  
1430 0.94686 (lh.precuneus\_5)(lh.precuneus\_8)  
1431 0.94686 (lh.precuneus\_8)(lh.superiorparietal\_10)  
1432 0.94686 (lh.rostralanteriorcingulate\_1)(lh.superiorfrontal\_3)(lh.superiorfrontal\_4)  
1433 0.94686 (lh.rostralmiddlefrontal\_7)(lh.rostralmiddlefrontal\_9)  
1434 0.94686 (rh.bankssts\_2)(rh.middletemporal\_4)  
1435 0.94686 (rh.caudalmiddlefrontal\_1)(rh.caudalmiddlefrontal\_4)  
1436 0.94686 (rh.caudalmiddlefrontal\_4)(rh.precentral\_7)  
1437 0.94686 (rh.fusiform\_1)(rh.lateraloccipital\_4)  
1438 0.94686 (rh.fusiform\_1)(rh.lateraloccipital\_8)(rh.lingual\_2)  
1439 0.94686 (rh.inferiorparietal\_4)(rh.supramarginal\_8)  
1440 0.94686 (rh.insula\_1)(rh.insula\_2)(rh.supramarginal\_9)  
1441 0.94686 (rh.lateraloccipital\_4)(rh.lateraloccipital\_5)  
1442 0.94686 (rh.lateraloccipital\_8)(rh.lingual\_5)  
1443 0.94686 (rh.lateralorbitofrontal\_2)(rh.lateralorbitofrontal\_6)(rh.lateralorbitofrontal\_7)  
1444 0.94686 (rh.lateralorbitofrontal\_2)(rh.lateralorbitofrontal\_6)(rh.rostralmiddlefrontal\_12)  
1445 0.94686 (rh.paracentral\_3)(rh.paracentral\_4)  
1446 0.94686 (rh.paracentral\_4)(rh.precentral\_13)(rh.precentral\_15)  
1447 0.94686 (rh.postcentral\_1)(rh.supramarginal\_9)  
1448 0.94686 (rh.postcentral\_5)(rh.precentral\_13)  
1449 0.94686 (rh.postcentral\_5)(rh.supramarginal\_1)  
1450 0.94686 (rh.superiorfrontal\_11)(rh.superiorfrontal\_12)(rh.superiorfrontal\_13)

1451 0.94686 (rh.superiorfrontal\_2)(rh.superiorfrontal\_4)(rh.superiorfrontal\_6)  
1452 0.94686 (rh.superiorparietal\_1)(rh.supramarginal\_8)(rh.supramarginal\_9)  
1453 0.94686 (rh.supramarginal\_7)(rh.supramarginal\_8)(rh.supramarginal\_9)  
1454 0.94686 (Right-Caudate)(rh.insula\_1)(rh.supramarginal\_9)  
1455 0.94686 (Right-Hippocampus)(rh.insula\_2)(rh.supramarginal\_9)  
1456 0.94686 (Right-Hippocampus)(Right-Putamen)(rh.insula\_2)(rh.supramarginal\_9)  
1457 0.94686 (Right-Putamen)(rh.caudalmiddlefrontal\_4)(rh.precentral\_7)  
1458 0.94686 (Right-Putamen)(rh.insula\_1)(rh.insula\_2)(rh.supramarginal\_9)  
1459 0.94686 (Right-Putamen)(rh.insula\_1)(rh.precentral\_11)  
1460 0.94686 (Right-Putamen)(rh.lateralorbitofrontal\_6)(rh.parstriangularis\_1)(rh.rostralmiddlefrontal\_12)  
1461 0.94686 (Right-Putamen)(rh.parsopercularis\_2)(rh.parsopercularis\_4)  
1462 0.94444 (Left-Caudate)(Left-Hippocampus)(Left-Putamen)(Left-Thalamus-Proper)  
1463 0.94444 (Left-Caudate)(Left-Hippocampus)(Left-Putamen)  
1464 0.94444 (Left-Caudate)(Left-Hippocampus)(Left-Thalamus-Proper)  
1465 0.94444 (Left-Caudate)(Left-Hippocampus)  
1466 0.94444 (Left-Caudate)(Left-Putamen)(lh.caudalanteriorcingulate\_2)(lh.superiorfrontal\_11)  
1467 0.94444 (Left-Caudate)(Left-Putamen)(lh.lateralorbitofrontal\_2)  
1468 0.94444 (Left-Caudate)(Left-Putamen)(lh.lateralorbitofrontal\_7)  
1469 0.94444 (Left-Caudate)(Left-Putamen)(lh.medialorbitofrontal\_2)(lh.rostralanteriorcingulate\_1)  
1470 0.94444 (Left-Caudate)(Left-Putamen)(lh.precentral\_11)(lh.precentral\_7)  
1471 0.94444 (Left-Caudate)(Left-Putamen)(lh.rostralmiddlefrontal\_1)(lh.rostralmiddlefrontal\_4)  
1472 0.94444 (Left-Caudate)(Left-Putamen)(lh.superiorfrontal\_4)  
1473 0.94444 (Left-Caudate)(lh.caudalmiddlefrontal\_4)(lh.caudalmiddlefrontal\_6)(lh.precentral\_11)  
1474 0.94444 (Left-Caudate)(lh.lateralorbitofrontal\_2)  
1475 0.94444 (Left-Caudate)(lh.paracentral\_5)(lh.superiorfrontal\_14)  
1476 0.94444 (Left-Hippocampus)(lh.isthmuscingulate\_3)(lh.lingual\_6)  
1477 0.94444 (Left-Hippocampus)(lh.lingual\_7)  
1478 0.94444 (Left-Pallidum)(Left-Putamen)(Left-Thalamus-Proper)(lh.insula\_1)  
1479 0.94444 (Left-Pallidum)(Left-Putamen)(lh.insula\_1)  
1480 0.94444 (Left-Pallidum)(Left-Thalamus-Proper)(lh.insula\_1)  
1481 0.94444 (Left-Pallidum)(lh.insula\_1)  
1482 0.94444 (Left-Putamen)(lh.caudalmiddlefrontal\_1)(lh.caudalmiddlefrontal\_3)  
1483 0.94444 (Left-Putamen)(lh.caudalmiddlefrontal\_4)(lh.caudalmiddlefrontal\_6)(lh.precentral\_11)  
1484 0.94444 (Left-Putamen)(lh.lateralorbitofrontal\_6)(lh.rostralmiddlefrontal\_12)  
1485 0.94444 (Left-Putamen)(lh.lateralorbitofrontal\_7)(lh.medialorbitofrontal\_2)  
1486 0.94444 (Left-Putamen)(lh.medialorbitofrontal\_2)(lh.rostralmiddlefrontal\_12)  
1487 0.94444 (Left-Putamen)(lh.rostralanteriorcingulate\_1)(lh.rostralmiddlefrontal\_12)(lh.rostralmiddlefrontal\_9)  
1488 0.94444 (lh.bankssts\_3)(lh.inferiorparietal\_5)  
1489 0.94444 (lh.caudalmiddlefrontal\_3)(lh.rostralmiddlefrontal\_4)  
1490 0.94444 (lh.caudalmiddlefrontal\_6)(lh.precentral\_11)(lh.precentral\_9)  
1491 0.94444 (lh.inferiorparietal\_5)(lh.inferiorparietal\_9)  
1492 0.94444 (lh.insula\_1)(lh.postcentral\_14)  
1493 0.94444 (lh.isthmuscingulate\_3)(lh.lingual\_6)(lh.precuneus\_11)  
1494 0.94444 (lh.lateraloccipital\_11)(lh.lingual\_1)(lh.pericalcarine\_2)  
1495 0.94444 (lh.lateraloccipital\_3)(lh.pericalcarine\_2)(lh.pericalcarine\_3)  
1496 0.94444 (lh.lateralorbitofrontal\_6)(lh.parstriangularis\_3)(lh.rostralmiddlefrontal\_12)(lh.rostralmiddlefrontal\_9)  
1497 0.94444 (lh.paracentral\_1)(lh.precentral\_2)  
1498 0.94444 (lh.paracentral\_5)(lh.superiorfrontal\_14)(lh.superiorfrontal\_15)  
1499 0.94444 (lh.pericalcarine\_3)(lh.precuneus\_11)  
1500 0.94444 (lh.postcentral\_6)(lh.postcentral\_8)

1501 0.94444 (lh.precentral\_11)(lh.precentral\_13)  
1502 0.94444 (lh.precuneus\_10)(lh.precuneus\_8)  
1503 0.94444 (lh.rostralmiddlefrontal\_4)(lh.rostralmiddlefrontal\_8)  
1504 0.94444 (lh.rostralmiddlefrontal\_4)(lh.superiorfrontal\_10)(lh.superiorfrontal\_4)  
1505 0.94444 (lh.superiorfrontal\_11)(lh.superiorfrontal\_7)(lh.superiorfrontal\_8)(lh.superiorfrontal\_9)  
1506 0.94444 (lh.superiorfrontal\_13)(lh.superiorfrontal\_14)(lh.superiorfrontal\_8)  
1507 0.94444 (lh.superiorfrontal\_13)(lh.superiorfrontal\_8)  
1508 0.94444 (lh.supramarginal\_1)(lh.supramarginal\_9)  
1509 0.94444 (rh.bankssts\_2)(rh.superiortemporal\_1)  
1510 0.94444 (rh.caudalmiddlefrontal\_4)(rh.insula\_7)  
1511 0.94444 (rh.fusiform\_1)(rh.lateraloccipital\_10)(rh.lateraloccipital\_8)(rh.lateraloccipital\_9)  
1512 0.94444 (rh.fusiform\_1)(rh.lateraloccipital\_4)(rh.lateraloccipital\_8)  
1513 0.94444 (rh.inferiorparietal\_10)(rh.inferiorparietal\_4)  
1514 0.94444 (rh.insula\_1)(rh.insula\_2)(rh.precentral\_7)  
1515 0.94444 (rh.insula\_1)(rh.insula\_3)(rh.precentral\_7)  
1516 0.94444 (rh.insula\_7)(rh.parstriangularis\_1)  
1517 0.94444 (rh.lateraloccipital\_1)(rh.lateraloccipital\_3)(rh.pericalcarine\_2)  
1518 0.94444 (rh.lateraloccipital\_7)(rh.pericalcarine\_3)  
1519 0.94444 (rh.lateralorbitofrontal\_6)(rh.parstriangularis\_1)(rh.parstriangularis\_4)  
1520 0.94444 (rh.lateralorbitofrontal\_6)(rh.parstriangularis\_3)  
1521 0.94444 (rh.lateralorbitofrontal\_7)(rh.rostralmiddlefrontal\_13)  
1522 0.94444 (rh.middletemporal\_4)(rh.middletemporal\_6)  
1523 0.94444 (rh.parsopercularis\_2)(rh.parstriangularis\_2)  
1524 0.94444 (rh.parstriangularis\_4)(rh.rostralmiddlefrontal\_8)  
1525 0.94444 (rh.postcentral\_1)(rh.precentral\_1)(rh.precentral\_6)  
1526 0.94444 (rh.precuneus\_1)(rh.precuneus\_4)  
1527 0.94444 (rh.precuneus\_1)(rh.superiorparietal\_12)  
1528 0.94444 (rh.precuneus\_4)(rh.superiorparietal\_1)  
1529 0.94444 (rh.precuneus\_4)(rh.superiorparietal\_10)(rh.superiorparietal\_7)  
1530 0.94444 (rh.precuneus\_7)(rh.superiorparietal\_1)(rh.superiorparietal\_7)  
1531 0.94444 (rh.superiorfrontal\_15)(rh.superiorfrontal\_16)  
1532 0.94444 (rh.superiorparietal\_10)(rh.superiorparietal\_7)(rh.superiorparietal\_8)  
1533 0.94444 (rh.superiortemporal\_3)(rh.superiortemporal\_4)  
1534 0.94444 (Right-Caudate)(rh.insula\_7)  
1535 0.94444 (Right-Caudate)(rh.superiorfrontal\_13)  
1536 0.94444 (Right-Caudate)(rh.superiorfrontal\_2)  
1537 0.94444 (Right-Caudate)(Right-Putamen)(rh.insula\_1)(rh.supramarginal\_9)  
1538 0.94444 (Right-Caudate)(Right-Putamen)(rh.insula\_7)  
1539 0.94444 (Right-Putamen)(rh.caudalmiddlefrontal\_4)(rh.insula\_7)  
1540 0.94444 (Right-Putamen)(rh.insula\_1)(rh.insula\_2)(rh.precentral\_7)  
1541 0.94444 (Right-Putamen)(rh.insula\_1)(rh.insula\_3)(rh.precentral\_7)  
1542 0.94444 (Right-Putamen)(rh.lateralorbitofrontal\_1)  
1543 0.94444 (Right-Putamen)(rh.lateralorbitofrontal\_2)(rh.lateralorbitofrontal\_7)  
1544 0.94444 (Right-Putamen)(rh.superiorfrontal\_7)  
1545 0.94203 (Left-Amygdala)(Left-Putamen)(lh.insula\_7)  
1546 0.94203 (Left-Amygdala)(lh.insula\_7)  
1547 0.94203 (Left-Caudate)(Left-Putamen)(lh.caudalanteriorcingulate\_1)(lh.rostralanteriorcingulate\_2)  
1548 0.94203 (Left-Caudate)(Left-Putamen)(lh.lateralorbitofrontal\_4)  
1549 0.94203 (Left-Caudate)(lh.caudalanteriorcingulate\_2)(lh.superiorfrontal\_11)(lh.superiorfrontal\_14)  
1550 0.94203 (Left-Caudate)(lh.caudalmiddlefrontal\_3)(lh.caudalmiddlefrontal\_5)

1551 0.94203 (Left-Caudate)(lh.insula\_6)(lh.parstriangularis\_3)  
1552 0.94203 (Left-Caudate)(lh.lateralorbitofrontal\_4)  
1553 0.94203 (Left-Caudate)(lh.lateralorbitofrontal\_7)(lh.medialorbitofrontal\_2)  
1554 0.94203 (Left-Caudate)(lh.superiorfrontal\_11)(lh.superiorfrontal\_12)(lh.superiorfrontal\_14)  
1555 0.94203 (Left-Pallidum)(Left-Putamen)(lh.precentral\_11)  
1556 0.94203 (Left-Pallidum)(lh.precentral\_11)  
1557 0.94203 (Left-Putamen)(lh.lateralorbitofrontal\_4)(lh.lateralorbitofrontal\_7)  
1558 0.94203 (Left-Putamen)(lh.lateralorbitofrontal\_6)(lh.lateralorbitofrontal\_7)  
1559 0.94203 (Left-Putamen)(lh.lateralorbitofrontal\_6)(lh.parstriangularis\_3)(lh.rostralmiddlefrontal\_9)  
1560 0.94203 (Left-Thalamus-Proper)(lh.precentral\_11)(lh.precentral\_4)  
1561 0.94203 (lh.caudalanteriorcingulate\_2)(lh.posteriorcingulate\_2)  
1562 0.94203 (lh.caudalmiddlefrontal\_1)(lh.caudalmiddlefrontal\_3)(lh.caudalmiddlefrontal\_4)  
1563 0.94203 (lh.inferiorparietal\_5)(lh.superiortemporal\_2)  
1564 0.94203 (lh.inferiorparietal\_6)(lh.inferiorparietal\_7)(lh.inferiorparietal\_8)  
1565 0.94203 (lh.inferiorparietal\_8)(lh.superiorparietal\_11)  
1566 0.94203 (lh.lateralorbitofrontal\_2)(lh.lateralorbitofrontal\_7)  
1567 0.94203 (lh.lateralorbitofrontal\_4)(lh.lateralorbitofrontal\_7)  
1568 0.94203 (lh.lateralorbitofrontal\_4)(lh.rostralmiddlefrontal\_12)  
1569 0.94203 (lh.lateralorbitofrontal\_6)(lh.lateralorbitofrontal\_7)(lh.rostralmiddlefrontal\_12)  
1570 0.94203 (lh.lateralorbitofrontal\_7)(lh.parstriangularis\_3)(lh.rostralmiddlefrontal\_12)  
1571 0.94203 (lh.lateralorbitofrontal\_7)(lh.rostralmiddlefrontal\_9)  
1572 0.94203 (lh.medialorbitofrontal\_2)(lh.rostralanteriorcingulate\_1)(lh.rostralmiddlefrontal\_12)  
1573 0.94203 (lh.medialorbitofrontal\_2)(lh.rostralanteriorcingulate\_1)(lh.superiorfrontal\_3)  
1574 0.94203 (lh.medialorbitofrontal\_2)(lh.rostralmiddlefrontal\_12)(lh.rostralmiddlefrontal\_9)(lh.superiorfrontal\_3)  
1575 0.94203 (lh.paracentral\_3)(lh.paracentral\_4)(lh.paracentral\_5)  
1576 0.94203 (lh.paracentral\_5)(lh.superiorfrontal\_12)  
1577 0.94203 (lh.postcentral\_8)(lh.precentral\_4)  
1578 0.94203 (lh.rostralanteriorcingulate\_1)(lh.rostralmiddlefrontal\_9)(lh.superiorfrontal\_3)  
1579 0.94203 (lh.superiorparietal\_5)(lh.supramarginal\_6)  
1580 0.94203 (rh.bankssts\_1)(rh.inferiortemporal\_6)  
1581 0.94203 (rh.bankssts\_1)(rh.middletemporal\_4)  
1582 0.94203 (rh.caudalmiddlefrontal\_4)(rh.caudalmiddlefrontal\_5)(rh.rostralmiddlefrontal\_1)  
1583 0.94203 (rh.fusiform\_1)(rh.lateraloccipital\_8)(rh.lingual\_5)  
1584 0.94203 (rh.lateraloccipital\_1)(rh.lateraloccipital\_4)  
1585 0.94203 (rh.lateraloccipital\_4)(rh.lateraloccipital\_7)(rh.lingual\_2)  
1586 0.94203 (rh.lateraloccipital\_7)(rh.lateraloccipital\_8)(rh.lingual\_2)  
1587 0.94203 (rh.lateralorbitofrontal\_7)(rh.medialorbitofrontal\_2)(rh.rostralmiddlefrontal\_11)  
1588 0.94203 (rh.lateralorbitofrontal\_7)(rh.rostralmiddlefrontal\_11)  
1589 0.94203 (rh.paracentral\_3)(rh.precentral\_16)  
1590 0.94203 (rh.parsopercularis\_3)(rh.parsopercularis\_4)  
1591 0.94203 (rh.postcentral\_4)(rh.supramarginal\_7)  
1592 0.94203 (rh.precentral\_1)(rh.precentral\_4)  
1593 0.94203 (rh.precentral\_11)(rh.supramarginal\_1)  
1594 0.94203 (rh.precentral\_13)(rh.superiorfrontal\_14)  
1595 0.94203 (rh.precuneus\_4)(rh.precuneus\_7)(rh.superiorparietal\_7)  
1596 0.94203 (rh.rostralmiddlefrontal\_11)(rh.superiorfrontal\_1)  
1597 0.94203 (rh.rostralmiddlefrontal\_4)(rh.rostralmiddlefrontal\_5)  
1598 0.94203 (rh.superiortemporal\_10)(rh.superiortemporal\_7)  
1599 0.94203 (Right-Caudate)(rh.parstriangularis\_1)  
1600 0.94203 (Right-Caudate)(Right-Putamen)(rh.posteriorcingulate\_1)



1601 0.94203 (Right-Putamen)(rh.insula\_1)(rh.superiorparietal\_1)(rh.supramarginal\_9)  
1602 0.94203 (Right-Putamen)(rh.insula\_1)(rh.supramarginal\_1)(rh.supramarginal\_9)  
1603 0.94203 (Right-Putamen)(rh.insula\_7)(rh.parstriangularis\_1)  
1604 0.94203 (Right-Putamen)(rh.lateralorbitofrontal\_2)(rh.lateralorbitofrontal\_6)(rh.lateralorbitofrontal\_7)  
1605 0.94203 (Right-Putamen)(rh.lateralorbitofrontal\_2)(rh.lateralorbitofrontal\_6)(rh.rostralmiddlefrontal\_12)  
1606 0.94203 (Right-Putamen)(rh.lateralorbitofrontal\_6)(rh.lateralorbitofrontal\_7)(rh.rostralmiddlefrontal\_12)  
1607 0.94203 (Right-Putamen)(rh.posteriorcingulate\_1)  
1608 0.93961 (Left-Caudate)(Left-Pallidum)(Left-Putamen)(lh.precentral\_11)  
1609 0.93961 (Left-Caudate)(Left-Pallidum)(lh.precentral\_11)  
1610 0.93961 (Left-Caudate)(Left-Putamen)(lh.rostralmiddlefrontal\_1)(lh.rostralmiddlefrontal\_9)  
1611 0.93961 (Left-Caudate)(Left-Thalamus-Proper)(lh.precentral\_11)(lh.precentral\_4)  
1612 0.93961 (Left-Caudate)(lh.caudalanteriorcingulate\_2)(lh.caudalmiddlefrontal\_3)(lh.superiorfrontal\_11)  
1613 0.93961 (Left-Caudate)(lh.caudalanteriorcingulate\_2)(lh.superiorfrontal\_8)  
1614 0.93961 (Left-Caudate)(lh.caudalmiddlefrontal\_6)(lh.precentral\_9)  
1615 0.93961 (Left-Caudate)(lh.superiorfrontal\_11)(lh.superiorfrontal\_8)  
1616 0.93961 (Left-Hippocampus)(Left-Thalamus-Proper)(lh.isthmuscingulate\_2)  
1617 0.93961 (Left-Hippocampus)(lh.bankssts\_2)  
1618 0.93961 (Left-Putamen)(Left-Thalamus-Proper)(lh.insula\_2)(lh.precentral\_11)  
1619 0.93961 (Left-Putamen)(lh.caudalanteriorcingulate\_1)(lh.caudalanteriorcingulate\_2)(lh.rostralanteriorcingulate\_2)  
1620 0.93961 (Left-Putamen)(lh.caudalanteriorcingulate\_2)(lh.superiorfrontal\_12)  
1621 0.93961 (Left-Putamen)(lh.caudalmiddlefrontal\_3)(lh.caudalmiddlefrontal\_5)  
1622 0.93961 (Left-Putamen)(lh.insula\_6)(lh.parsopercularis\_1)(lh.parsopercularis\_3)  
1623 0.93961 (Left-Putamen)(lh.lateralorbitofrontal\_4)(lh.lateralorbitofrontal\_6)(lh.rostralmiddlefrontal\_9)  
1624 0.93961 (Left-Putamen)(lh.lateralorbitofrontal\_6)(lh.rostralmiddlefrontal\_12)(lh.rostralmiddlefrontal\_9)  
1625 0.93961 (Left-Putamen)(lh.parstriangularis\_3)(lh.rostralmiddlefrontal\_4)  
1626 0.93961 (Left-Putamen)(lh.postcentral\_8)(lh.precentral\_7)  
1627 0.93961 (Left-Thalamus-Proper)(lh.insula\_2)(lh.precentral\_11)  
1628 0.93961 (Left-Thalamus-Proper)(lh.precentral\_11)(lh.precentral\_7)  
1629 0.93961 (lh.caudalanteriorcingulate\_2)(lh.superiorfrontal\_10)  
1630 0.93961 (lh.caudalmiddlefrontal\_1)(lh.rostralmiddlefrontal\_4)  
1631 0.93961 (lh.caudalmiddlefrontal\_3)(lh.rostralmiddlefrontal\_1)(lh.rostralmiddlefrontal\_3)  
1632 0.93961 (lh.cuneus\_1)(lh.pericalcarine\_3)(lh.superiorparietal\_12)  
1633 0.93961 (lh.fusiform\_1)(lh.fusiform\_5)(lh.lateraloccipital\_9)(lh.lingual\_8)  
1634 0.93961 (lh.fusiform\_2)(lh.lateraloccipital\_6)(lh.lingual\_1)(lh.pericalcarine\_3)  
1635 0.93961 (lh.fusiform\_2)(lh.lingual\_1)(lh.lingual\_4)  
1636 0.93961 (lh.fusiform\_2)(lh.lingual\_4)(lh.lingual\_8)  
1637 0.93961 (lh.fusiform\_2)(lh.lingual\_8)(lh.pericalcarine\_3)  
1638 0.93961 (lh.insula\_1)(lh.superiorparietal\_5)  
1639 0.93961 (lh.lateraloccipital\_6)(lh.lateraloccipital\_7)(lh.pericalcarine\_3)  
1640 0.93961 (lh.lateralorbitofrontal\_4)(lh.lateralorbitofrontal\_6)(lh.parstriangularis\_3)(lh.rostralmiddlefrontal\_9)  
1641 0.93961 (lh.lateralorbitofrontal\_6)(lh.parstriangularis\_3)(lh.rostralmiddlefrontal\_1)  
1642 0.93961 (lh.lateralorbitofrontal\_6)(lh.rostralmiddlefrontal\_1)  
1643 0.93961 (lh.lingual\_6)(lh.lingual\_7)  
1644 0.93961 (lh.paracentral\_5)(lh.superiorparietal\_2)  
1645 0.93961 (lh.precuneus\_6)(lh.precuneus\_9)(lh.superiorparietal\_11)  
1646 0.93961 (lh.rostralmiddlefrontal\_12)(lh.rostralmiddlefrontal\_6)  
1647 0.93961 (lh.superiorfrontal\_12)(lh.superiorfrontal\_14)(lh.superiorfrontal\_15)  
1648 0.93961 (lh.superiorfrontal\_12)(lh.superiorfrontal\_15)  
1649 0.93961 (rh.bankssts\_1)(rh.inferiortemporal\_5)  
1650 0.93961 (rh.caudalanteriorcingulate\_1)(rh.rostralanteriorcingulate\_2)

1651 0.93961 (rh.cuneus\_4)(rh.lateraloccipital\_1)  
1652 0.93961 (rh.fusiform\_2)(rh.lateraloccipital\_8)  
1653 0.93961 (rh.fusiform\_8)(rh.inferiortemporal\_1)  
1654 0.93961 (rh.inferiorparietal\_6)(rh.inferiorparietal\_8)  
1655 0.93961 (rh.inferiortemporal\_3)(rh.inferiortemporal\_4)  
1656 0.93961 (rh.insula\_1)(rh.superiorparietal\_1)(rh.supramarginal\_1)  
1657 0.93961 (rh.lateraloccipital\_10)(rh.lingual\_5)  
1658 0.93961 (rh.lateraloccipital\_4)(rh.pericalcarine\_4)  
1659 0.93961 (rh.lateralorbitofrontal\_2)(rh.parstriangularis\_1)(rh.rostralmiddlefrontal\_12)  
1660 0.93961 (rh.medialorbitofrontal\_2)(rh.superiorfrontal\_2)  
1661 0.93961 (rh.parsopercularis\_2)(rh.parsopercularis\_3)(rh.parsopercularis\_4)  
1662 0.93961 (rh.pericalcarine\_1)(rh.superiorparietal\_11)  
1663 0.93961 (rh.rostralmiddlefrontal\_1)(rh.rostralmiddlefrontal\_2)  
1664 0.93961 (rh.superiorfrontal\_2)(rh.superiorfrontal\_4)(rh.superiorfrontal\_5)(rh.superiorfrontal\_6)  
1665 0.93961 (rh.superiorfrontal\_3)(rh.superiorfrontal\_5)  
1666 0.93961 (Right-Hippocampus)(rh.entorhinal\_1)  
1667 0.93961 (Right-Putamen)(rh.lateralorbitofrontal\_5)(rh.lateralorbitofrontal\_7)  
1668 0.9372 (Left-Caudate)(Left-Putamen)(lh.caudalanteriorcingulate\_2)(lh.superiorfrontal\_12)  
1669 0.9372 (Left-Caudate)(Left-Putamen)(lh.caudalmiddlefrontal\_4)(lh.caudalmiddlefrontal\_5)  
1670 0.9372 (Left-Caudate)(Left-Putamen)(lh.insula\_6)(lh.rostralmiddlefrontal\_1)  
1671 0.9372 (Left-Caudate)(lh.caudalanteriorcingulate\_2)(lh.posteriorcingulate\_2)  
1672 0.9372 (Left-Caudate)(lh.caudalanteriorcingulate\_2)(lh.rostralanteriorcingulate\_1)  
1673 0.9372 (Left-Caudate)(lh.parstriangularis\_3)(lh.rostralmiddlefrontal\_1)(lh.rostralmiddlefrontal\_9)  
1674 0.9372 (Left-Caudate)(lh.posteriorcingulate\_3)(lh.superiorfrontal\_14)  
1675 0.9372 (Left-Caudate)(lh.rostralanteriorcingulate\_2)(lh.rostralmiddlefrontal\_4)  
1676 0.9372 (Left-Caudate)(lh.rostralmiddlefrontal\_12)  
1677 0.9372 (Left-Caudate)(lh.superiorfrontal\_12)(lh.superiorfrontal\_8)  
1678 0.9372 (Left-Caudate)(lh.superiorfrontal\_14)(lh.superiorfrontal\_8)  
1679 0.9372 (Left-Putamen)(Left-Thalamus-Proper)(lh.precentral\_11)(lh.precentral\_4)  
1680 0.9372 (Left-Putamen)(Left-Thalamus-Proper)(lh.precentral\_11)(lh.precentral\_7)  
1681 0.9372 (Left-Putamen)(lh.lateralorbitofrontal\_2)(lh.lateralorbitofrontal\_7)  
1682 0.9372 (Left-Putamen)(lh.lateralorbitofrontal\_4)(lh.rostralmiddlefrontal\_12)  
1683 0.9372 (Left-Putamen)(lh.parstriangularis\_3)(lh.rostralmiddlefrontal\_12)  
1684 0.9372 (Left-Thalamus-Proper)(lh.paracentral\_5)  
1685 0.9372 (Left-Thalamus-Proper)(lh.posteriorcingulate\_4)  
1686 0.9372 (Left-Thalamus-Proper)(lh.precentral\_4)(lh.precentral\_7)  
1687 0.9372 (lh.bankssts\_3)(lh.superiortemporal\_2)  
1688 0.9372 (lh.caudalanteriorcingulate\_2)(lh.rostralanteriorcingulate\_1)(lh.rostralanteriorcingulate\_2)  
1689 0.9372 (lh.caudalanteriorcingulate\_2)(lh.rostralanteriorcingulate\_1)  
1690 0.9372 (lh.caudalanteriorcingulate\_2)(lh.superiorfrontal\_11)(lh.superiorfrontal\_12)(lh.superiorfrontal\_14)  
1691 0.9372 (lh.fusiform\_2)(lh.lateraloccipital\_11)(lh.lingual\_1)  
1692 0.9372 (lh.fusiform\_7)(lh.middletemporal\_4)  
1693 0.9372 (lh.inferiorparietal\_1)(lh.inferiorparietal\_8)  
1694 0.9372 (lh.insula\_6)(lh.parsopercularis\_3)(lh.parstriangularis\_3)  
1695 0.9372 (lh.isthmuscingulate\_2)(lh.precuneus\_6)  
1696 0.9372 (lh.lateraloccipital\_3)(lh.lateraloccipital\_6)  
1697 0.9372 (lh.lateraloccipital\_7)(lh.lateraloccipital\_8)  
1698 0.9372 (lh.lateralorbitofrontal\_4)(lh.lateralorbitofrontal\_6)(lh.rostralmiddlefrontal\_12)  
1699 0.9372 (lh.lateralorbitofrontal\_6)(lh.parsorbitalis\_1)(lh.parstriangularis\_3)  
1700 0.9372 (lh.lateralorbitofrontal\_7)(lh.medialorbitofrontal\_4)

1701 0.9372 (lh.medialorbitofrontal\_1)(lh.medialorbitofrontal\_2)  
1702 0.9372 (lh.postcentral\_8)(lh.precentral\_14)  
1703 0.9372 (lh.postcentral\_8)(lh.supramarginal\_4)  
1704 0.9372 (lh.precentral\_2)(lh.precentral\_3)  
1705 0.9372 (lh.rostralmiddlefrontal\_1)(lh.rostralmiddlefrontal\_7)  
1706 0.9372 (lh.rostralmiddlefrontal\_4)(lh.superiorfrontal\_11)  
1707 0.9372 (lh.superiorfrontal\_11)(lh.superiorfrontal\_14)(lh.superiorfrontal\_8)(lh.superiorfrontal\_9)  
1708 0.9372 (lh.supramarginal\_4)(lh.supramarginal\_9)  
1709 0.9372 (rh.bankssts\_2)(rh.superiortemporal\_9)  
1710 0.9372 (rh.caudalmiddlefrontal\_1)(rh.caudalmiddlefrontal\_2)  
1711 0.9372 (rh.fusiform\_3)(rh.fusiform\_6)  
1712 0.9372 (rh.inferiorparietal\_4)(rh.supramarginal\_9)  
1713 0.9372 (rh.inferiortemporal\_2)(rh.middletemporal\_5)  
1714 0.9372 (rh.inferiortemporal\_6)(rh.middletemporal\_2)  
1715 0.9372 (rh.lateraloccipital\_1)(rh.superiorparietal\_13)  
1716 0.9372 (rh.lateraloccipital\_3)(rh.pericalcarine\_2)(rh.superiorparietal\_11)  
1717 0.9372 (rh.lateraloccipital\_7)(rh.lingual\_1)  
1718 0.9372 (rh.lateralorbitofrontal\_5)(rh.medialorbitofrontal\_2)  
1719 0.9372 (rh.medialorbitofrontal\_2)(rh.rostralmiddlefrontal\_12)  
1720 0.9372 (rh.parsorbitalis\_1)(rh.parstriangularis\_1)  
1721 0.9372 (rh.parstriangularis\_1)(rh.parstriangularis\_2)(rh.rostralmiddlefrontal\_3)  
1722 0.9372 (rh.postcentral\_10)(rh.superiorparietal\_1)  
1723 0.9372 (rh.precentral\_6)(rh.precentral\_8)  
1724 0.9372 (rh.precuneus\_3)(rh.precuneus\_4)(rh.precuneus\_7)  
1725 0.9372 (rh.precuneus\_7)(rh.superiorparietal\_10)  
1726 0.9372 (rh.precuneus\_7)(rh.superiorparietal\_7)(rh.superiorparietal\_8)  
1727 0.9372 (rh.rostralmiddlefrontal\_8)(rh.rostralmiddlefrontal\_9)  
1728 0.9372 (rh.rostralmiddlefrontal\_9)(rh.superiorfrontal\_7)  
1729 0.9372 (Right-Caudate)(rh.caudalanteriorcingulate\_1)(rh.rostralanteriorcingulate\_2)  
1730 0.9372 (Right-Caudate)(rh.caudalmiddlefrontal\_4)(rh.superiorfrontal\_13)  
1731 0.9372 (Right-Caudate)(Right-Pallidum)(Right-Putamen)(Right-Thalamus-Proper)(rh.precentral\_13)  
1732 0.9372 (Right-Caudate)(Right-Pallidum)(Right-Thalamus-Proper)(rh.precentral\_13)  
1733 0.9372 (Right-Pallidum)(Right-Putamen)(Right-Thalamus-Proper)(rh.precentral\_13)  
1734 0.9372 (Right-Pallidum)(Right-Thalamus-Proper)(rh.precentral\_13)  
1735 0.9372 (Right-Putamen)(rh.lateralorbitofrontal\_4)(rh.lateralorbitofrontal\_5)  
1736 0.9372 (Right-Putamen)(rh.parsopercularis\_4)(rh.rostralmiddlefrontal\_3)  
1737 0.9372 (Right-Putamen)(rh.postcentral\_1)(rh.precentral\_6)  
1738 0.93478 (Left-Caudate)(Left-Hippocampus)(Left-Pallidum)(Left-Putamen)(Left-Thalamus-Proper)  
1739 0.93478 (Left-Caudate)(Left-Hippocampus)(Left-Pallidum)(Left-Putamen)  
1740 0.93478 (Left-Caudate)(Left-Hippocampus)(Left-Pallidum)(Left-Thalamus-Proper)  
1741 0.93478 (Left-Caudate)(Left-Hippocampus)(Left-Pallidum)  
1742 0.93478 (Left-Caudate)(Left-Pallidum)(Left-Putamen)(Left-Thalamus-Proper)(lh.insula\_1)  
1743 0.93478 (Left-Caudate)(Left-Pallidum)(Left-Putamen)(lh.insula\_1)  
1744 0.93478 (Left-Caudate)(Left-Pallidum)(Left-Thalamus-Proper)(lh.insula\_1)  
1745 0.93478 (Left-Caudate)(Left-Pallidum)(lh.insula\_1)  
1746 0.93478 (Left-Caudate)(Left-Putamen)(Left-Thalamus-Proper)(lh.precentral\_11)(lh.precentral\_4)  
1747 0.93478 (Left-Caudate)(Left-Putamen)(lh.caudalanteriorcingulate\_1)(lh.caudalanteriorcingulate\_2)(lh.rostralanteriorcingulate\_2)  
1748 0.93478 (Left-Caudate)(Left-Putamen)(lh.medialorbitofrontal\_2)(lh.rostralmiddlefrontal\_9)  
1749 0.93478 (Left-Caudate)(Left-Putamen)(lh.medialorbitofrontal\_4)  
1750 0.93478 (Left-Caudate)(Left-Putamen)(lh.posteriorcingulate\_1)(lh.posteriorcingulate\_3)

1751 0.93478 (Left-Caudate)(Left-Putamen)(lh.precentral\_4)(lh.precentral\_7)  
1752 0.93478 (Left-Caudate)(Left-Thalamus-Proper)(Right-Caudate)  
1753 0.93478 (Left-Caudate)(lh.caudalanteriorcingulate\_2)(lh.rostralanteriorcingulate\_1)(lh.rostralanteriorcingulate\_2)  
1754 0.93478 (Left-Caudate)(lh.caudalmiddlefrontal\_1)(lh.caudalmiddlefrontal\_4)  
1755 0.93478 (Left-Caudate)(lh.medialorbitofrontal\_2)(lh.rostralanteriorcingulate\_1)(lh.rostralmiddlefrontal\_9)  
1756 0.93478 (Left-Caudate)(lh.superiorfrontal\_10)(lh.superiorfrontal\_11)(lh.superiorfrontal\_4)  
1757 0.93478 (Left-Putamen)(Left-Thalamus-Proper)(lh.precentral\_4)(lh.precentral\_7)  
1758 0.93478 (Left-Putamen)(lh.caudalmiddlefrontal\_3)(lh.insula\_6)(lh.rostralmiddlefrontal\_1)  
1759 0.93478 (Left-Putamen)(lh.insula\_1)(lh.insula\_2)  
1760 0.93478 (Left-Putamen)(lh.insula\_4)  
1761 0.93478 (Left-Putamen)(lh.lateralorbitofrontal\_4)(lh.lateralorbitofrontal\_6)(lh.parstriangularis\_3)  
1762 0.93478 (Left-Putamen)(lh.lateralorbitofrontal\_7)(lh.medialorbitofrontal\_2)(lh.rostralmiddlefrontal\_12)  
1763 0.93478 (Left-Putamen)(lh.medialorbitofrontal\_2)(lh.rostralmiddlefrontal\_12)(lh.rostralmiddlefrontal\_9)  
1764 0.93478 (Left-Putamen)(lh.medialorbitofrontal\_4)  
1765 0.93478 (Left-Putamen)(lh.parsopercularis\_1)(lh.rostralmiddlefrontal\_1)  
1766 0.93478 (Left-Putamen)(lh.parsstriangularis\_3)(lh.rostralanteriorcingulate\_1)  
1767 0.93478 (Left-Putamen)(lh.parsstriangularis\_3)(lh.rostralmiddlefrontal\_12)(lh.rostralmiddlefrontal\_9)  
1768 0.93478 (Left-Putamen)(lh.posteriorcingulate\_1)(lh.posteriorcingulate\_3)  
1769 0.93478 (Left-Thalamus-Proper)(lh.posteriorcingulate\_3)(lh.precentral\_4)  
1770 0.93478 (Left-Thalamus-Proper)(Right-Caudate)(Right-Thalamus-Proper)  
1771 0.93478 (Left-Thalamus-Proper)(Right-Caudate)  
1772 0.93478 (lh.insula\_1)(lh.insula\_2)  
1773 0.93478 (lh.lateraloccipital\_2)(lh.pericalcarine\_1)  
1774 0.93478 (lh.lateraloccipital\_3)(lh.lingual\_1)(lh.pericalcarine\_2)  
1775 0.93478 (lh.lateraloccipital\_6)(lh.pericalcarine\_2)  
1776 0.93478 (lh.lateralorbitofrontal\_4)(lh.lateralorbitofrontal\_6)(lh.lateralorbitofrontal\_7)  
1777 0.93478 (lh.lateralorbitofrontal\_6)(lh.parsstriangularis\_3)(lh.rostralmiddlefrontal\_1)(lh.rostralmiddlefrontal\_9)  
1778 0.93478 (lh.lateralorbitofrontal\_6)(lh.rostralmiddlefrontal\_1)(lh.rostralmiddlefrontal\_9)  
1779 0.93478 (lh.paracentral\_1)(lh.paracentral\_4)(lh.precentral\_2)  
1780 0.93478 (lh.paracentral\_4)(lh.precentral\_2)(lh.precentral\_3)  
1781 0.93478 (lh.parsstriangularis\_3)(lh.rostralmiddlefrontal\_1)(lh.rostralmiddlefrontal\_6)  
1782 0.93478 (lh.pericalcarine\_3)(lh.precuneus\_9)  
1783 0.93478 (lh.rostralanteriorcingulate\_2)(lh.rostralmiddlefrontal\_8)  
1784 0.93478 (lh.rostralmiddlefrontal\_10)(lh.rostralmiddlefrontal\_6)  
1785 0.93478 (lh.rostralmiddlefrontal\_12)(lh.rostralmiddlefrontal\_6)(lh.rostralmiddlefrontal\_9)  
1786 0.93478 (lh.rostralmiddlefrontal\_9)(lh.superiorfrontal\_3)(lh.superiorfrontal\_4)  
1787 0.93478 (lh.superiorfrontal\_14)(lh.superiorfrontal\_7)  
1788 0.93478 (lh.superiorparietal\_5)(lh.supramarginal\_9)  
1789 0.93478 (lh.supramarginal\_1)(lh.supramarginal\_4)  
1790 0.93478 (rh.bankssts\_1)(rh.middletemporal\_2)  
1791 0.93478 (rh.caudalanteriorcingulate\_2)(rh.caudalanteriorcingulate\_3)  
1792 0.93478 (rh.caudalmiddlefrontal\_2)(rh.caudalmiddlefrontal\_3)  
1793 0.93478 (rh.fusiform\_1)(rh.lateraloccipital\_10)(rh.lingual\_5)  
1794 0.93478 (rh.fusiform\_1)(rh.lateraloccipital\_8)(rh.lingual\_7)  
1795 0.93478 (rh.fusiform\_4)(rh.lateraloccipital\_10)  
1796 0.93478 (rh.fusiform\_5)(rh.lateraloccipital\_10)  
1797 0.93478 (rh.inferiorparietal\_1)(rh.supramarginal\_9)  
1798 0.93478 (rh.inferiorparietal\_2)(rh.inferiorparietal\_4)  
1799 0.93478 (rh.inferiortemporal\_2)(rh.middletemporal\_4)  
1800 0.93478 (rh.inferiortemporal\_6)(rh.middletemporal\_1)

1801 0.93478 (rh.lateraloccipital\_3)(rh.lateraloccipital\_4)(rh.pericalcarine\_3)  
1802 0.93478 (rh.lateraloccipital\_4)(rh.lateraloccipital\_8)(rh.pericalcarine\_1)  
1803 0.93478 (rh.lateralorbitofrontal\_4)(rh.lateralorbitofrontal\_6)  
1804 0.93478 (rh.lateralorbitofrontal\_6)(rh.parstriangularis\_4)(rh.rostralmiddlefrontal\_12)  
1805 0.93478 (rh.lateralorbitofrontal\_7)(rh.medialorbitofrontal\_2)(rh.rostralmiddlefrontal\_13)  
1806 0.93478 (rh.parstriangularis\_1)(rh.parstriangularis\_4)(rh.rostralmiddlefrontal\_3)  
1807 0.93478 (rh.precentral\_11)(rh.precentral\_12)(rh.precentral\_13)  
1808 0.93478 (rh.precuneus\_5)(rh.precuneus\_8)  
1809 0.93478 (rh.rostralmiddlefrontal\_11)(rh.superiorfrontal\_1)(rh.superiorfrontal\_2)  
1810 0.93478 (rh.superiorfrontal\_13)(rh.superiorfrontal\_8)  
1811 0.93478 (Right-Caudate)(rh.caudalanteriorcingulate\_2)(rh.caudalanteriorcingulate\_3)  
1812 0.93478 (Right-Caudate)(rh.rostralmiddlefrontal\_8)  
1813 0.93478 (Right-Caudate)(Right-Putamen)(rh.caudalmiddlefrontal\_4)(rh.caudalmiddlefrontal\_5)  
1814 0.93478 (Right-Caudate)(Right-Putamen)(rh.caudalmiddlefrontal\_5)  
1815 0.93478 (Right-Caudate)(Right-Putamen)(rh.parstriangularis\_1)  
1816 0.93478 (Right-Hippocampus)(rh.bankssts\_2)(rh.superiortemporal\_9)  
1817 0.93478 (Right-Hippocampus)(rh.insula\_4)(rh.insula\_5)  
1818 0.93478 (Right-Hippocampus)(rh.precuneus\_7)  
1819 0.93478 (Right-Hippocampus)(Right-Putamen)(rh.insula\_4)(rh.insula\_5)  
1820 0.93478 (Right-Putamen)(rh.insula\_3)(rh.precentral\_6)  
1821 0.93478 (Right-Putamen)(rh.lateralorbitofrontal\_4)(rh.lateralorbitofrontal\_6)  
1822 0.93237 (Left-Amygdala)(lh.entorhinal\_1)  
1823 0.93237 (Left-Caudate)(Left-Putamen)(lh.caudalanteriorcingulate\_1)(lh.rostralanteriorcingulate\_1)  
1824 0.93237 (Left-Caudate)(Left-Putamen)(lh.caudalmiddlefrontal\_1)(lh.caudalmiddlefrontal\_3)  
1825 0.93237 (Left-Caudate)(Left-Thalamus-Proper)(lh.posteriorcingulate\_3)(lh.precentral\_4)  
1826 0.93237 (Left-Caudate)(lh.parsopercularis\_3)(lh.rostralmiddlefrontal\_1)  
1827 0.93237 (Left-Hippocampus)(Left-Thalamus-Proper)(lh.transversetemporal\_2)  
1828 0.93237 (Left-Putamen)(lh.caudalanteriorcingulate\_1)(lh.rostralanteriorcingulate\_1)  
1829 0.93237 (Left-Putamen)(lh.caudalmiddlefrontal\_3)(lh.rostralmiddlefrontal\_4)  
1830 0.93237 (Left-Putamen)(lh.insula\_6)(lh.parsopercularis\_3)(lh.rostralmiddlefrontal\_1)  
1831 0.93237 (Left-Putamen)(lh.lateralorbitofrontal\_7)(lh.parstriangularis\_3)  
1832 0.93237 (Left-Putamen)(lh.lateralorbitofrontal\_7)(lh.rostralmiddlefrontal\_9)  
1833 0.93237 (Left-Putamen)(lh.rostralmiddlefrontal\_4)(lh.superiorfrontal\_4)  
1834 0.93237 (lh.caudalanteriorcingulate\_2)(lh.posteriorcingulate\_1)(lh.posteriorcingulate\_2)  
1835 0.93237 (lh.caudalanteriorcingulate\_2)(lh.superiorfrontal\_10)(lh.superiorfrontal\_8)  
1836 0.93237 (lh.caudalmiddlefrontal\_3)(lh.rostralmiddlefrontal\_1)(lh.rostralmiddlefrontal\_4)  
1837 0.93237 (lh.fusiform\_1)(lh.fusiform\_2)(lh.lateraloccipital\_9)(lh.lingual\_8)  
1838 0.93237 (lh.inferiorparietal\_1)(lh.lateraloccipital\_6)(lh.pericalcarine\_3)  
1839 0.93237 (lh.inferiorparietal\_9)(lh.supramarginal\_10)  
1840 0.93237 (lh.insula\_6)(lh.parsopercularis\_1)(lh.parstriangularis\_3)(lh.rostralmiddlefrontal\_1)  
1841 0.93237 (lh.insula\_6)(lh.rostralmiddlefrontal\_4)  
1842 0.93237 (lh.isthmuscingulate\_3)(lh.precuneus\_10)(lh.precuneus\_6)  
1843 0.93237 (lh.lateraloccipital\_1)(lh.lateraloccipital\_2)(lh.pericalcarine\_2)  
1844 0.93237 (lh.lateraloccipital\_2)(lh.lateraloccipital\_3)(lh.pericalcarine\_3)  
1845 0.93237 (lh.lateralorbitofrontal\_6)(lh.parstriangularis\_1)(lh.parstriangularis\_3)  
1846 0.93237 (lh.lateralorbitofrontal\_6)(lh.parstriangularis\_2)  
1847 0.93237 (lh.lateralorbitofrontal\_7)(lh.parstriangularis\_3)(lh.rostralmiddlefrontal\_9)  
1848 0.93237 (lh.medialorbitofrontal\_4)(lh.medialorbitofrontal\_5)  
1849 0.93237 (lh.parstriangularis\_3)(lh.rostralmiddlefrontal\_1)(lh.rostralmiddlefrontal\_6)(lh.rostralmiddlefrontal\_9)  
1850 0.93237 (lh.precentral\_13)(lh.precentral\_14)

1851 0.93237 (lh.precentral\_15)(lh.precentral\_16)  
1852 0.93237 (lh.precuneus\_10)(lh.precuneus\_8)(lh.precuneus\_9)  
1853 0.93237 (lh.precuneus\_3)(lh.superiorparietal\_5)(lh.superiorparietal\_6)  
1854 0.93237 (lh.precuneus\_6)(lh.superiorparietal\_11)(lh.superiorparietal\_6)  
1855 0.93237 (lh.rostralmiddlefrontal\_1)(lh.rostralmiddlefrontal\_4)(lh.rostralmiddlefrontal\_5)  
1856 0.93237 (lh.rostralmiddlefrontal\_4)(lh.rostralmiddlefrontal\_9)(lh.superiorfrontal\_4)  
1857 0.93237 (lh.rostralmiddlefrontal\_9)(lh.superiorfrontal\_1)  
1858 0.93237 (lh.superiorfrontal\_14)(lh.superiorfrontal\_7)(lh.superiorfrontal\_8)  
1859 0.93237 (lh.superiorparietal\_3)(lh.supramarginal\_9)  
1860 0.93237 (rh.caudalmiddlefrontal\_4)(rh.superiorfrontal\_9)  
1861 0.93237 (rh.fusiform\_1)(rh.fusiform\_2)(rh.lingual\_5)  
1862 0.93237 (rh.fusiform\_1)(rh.lateraloccipital\_7)(rh.lateraloccipital\_8)(rh.lingual\_2)  
1863 0.93237 (rh.fusiform\_2)(rh.lateraloccipital\_10)(rh.lateraloccipital\_8)  
1864 0.93237 (rh.inferiorparietal\_10)(rh.inferiorparietal\_11)(rh.inferiorparietal\_12)  
1865 0.93237 (rh.inferiorparietal\_11)(rh.inferiorparietal\_12)(rh.lateraloccipital\_8)  
1866 0.93237 (rh.inferiortemporal\_2)(rh.middletemporal\_8)  
1867 0.93237 (rh.insula\_2)(rh.insula\_3)(rh.precentral\_7)  
1868 0.93237 (rh.insula\_3)(rh.insula\_7)(rh.parsopercularis\_4)  
1869 0.93237 (rh.insula\_7)(rh.rostralmiddlefrontal\_3)  
1870 0.93237 (rh.lateralorbitofrontal\_7)(rh.superiorfrontal\_2)  
1871 0.93237 (rh.lingual\_5)(rh.lingual\_6)  
1872 0.93237 (rh.medialorbitofrontal\_2)(rh.rostralmiddlefrontal\_11)(rh.superiorfrontal\_2)  
1873 0.93237 (rh.parsopercularis\_2)(rh.precentral\_1)  
1874 0.93237 (rh.postcentral\_1)(rh.postcentral\_2)  
1875 0.93237 (rh.precentral\_13)(rh.precentral\_8)  
1876 0.93237 (rh.precuneus\_5)(rh.superiorparietal\_10)  
1877 0.93237 (rh.rostralmiddlefrontal\_1)(rh.superiorfrontal\_7)  
1878 0.93237 (rh.rostralmiddlefrontal\_3)(rh.rostralmiddlefrontal\_6)(rh.rostralmiddlefrontal\_8)  
1879 0.93237 (rh.superiorfrontal\_11)(rh.superiorfrontal\_13)(rh.superiorfrontal\_8)  
1880 0.93237 (rh.superiorparietal\_1)(rh.supramarginal\_1)(rh.supramarginal\_8)  
1881 0.93237 (rh.supramarginal\_6)(rh.supramarginal\_9)  
1882 0.93237 (Right-Caudate)(lh.rostralanteriorcingulate\_1)  
1883 0.93237 (Right-Caudate)(rh.insula\_1)(rh.precentral\_7)  
1884 0.93237 (Right-Caudate)(rh.superiorfrontal\_11)(rh.superiorfrontal\_13)  
1885 0.93237 (Right-Caudate)(Right-Putamen)(rh.insula\_1)(rh.precentral\_7)  
1886 0.93237 (Right-Caudate)(Right-Putamen)(rh.rostralmiddlefrontal\_8)  
1887 0.93237 (Right-Hippocampus)(rh.bankssts\_1)  
1888 0.93237 (Right-Hippocampus)(rh.lingual\_5)  
1889 0.93237 (Right-Putamen)(rh.insula\_2)(rh.insula\_3)(rh.precentral\_7)  
1890 0.93237 (Right-Putamen)(rh.medialorbitofrontal\_2)(rh.rostralmiddlefrontal\_12)  
1891 0.92995 (Left-Caudate)(Left-Putamen)(lh.lateralorbitofrontal\_7)(lh.medialorbitofrontal\_2)  
1892 0.92995 (Left-Caudate)(Left-Thalamus-Proper)(lh.posteriorcingulate\_4)  
1893 0.92995 (Left-Caudate)(lh.caudalmiddlefrontal\_3)(lh.rostralmiddlefrontal\_4)  
1894 0.92995 (Left-Caudate)(lh.parstriangularis\_3)(lh.rostralmiddlefrontal\_4)  
1895 0.92995 (Left-Caudate)(lh.precentral\_11)(lh.precentral\_4)(lh.precentral\_7)  
1896 0.92995 (Left-Caudate)(lh.precentral\_14)  
1897 0.92995 (Left-Caudate)(lh.rostralanteriorcingulate\_1)(lh.rostralanteriorcingulate\_2)(lh.superiorfrontal\_4)  
1898 0.92995 (Left-Caudate)(lh.superiorfrontal\_4)(lh.superiorfrontal\_8)  
1899 0.92995 (Left-Caudate)(Right-Caudate)(lh.rostralanteriorcingulate\_1)  
1900 0.92995 (Left-Putamen)(lh.caudalmiddlefrontal\_6)(lh.precentral\_11)(lh.precentral\_9)

1901 0.92995 (Left-Putamen)(lh.lateralorbitofrontal\_4)(lh.lateralorbitofrontal\_6)(lh.lateralorbitofrontal\_7)  
1902 0.92995 (Left-Putamen)(lh.medialorbitofrontal\_2)(lh.rostralanteriorcingulate\_1)(lh.rostralmiddlefrontal\_9)  
1903 0.92995 (Left-Putamen)(lh.parstriangularis\_3)(lh.rostralanteriorcingulate\_1)(lh.rostralmiddlefrontal\_9)  
1904 0.92995 (Left-Putamen)(lh.rostralanteriorcingulate\_2)(lh.superiorfrontal\_4)  
1905 0.92995 (lh.caudalmiddlefrontal\_6)(lh.superiorfrontal\_12)  
1906 0.92995 (lh.fusiform\_4)(lh.fusiform\_5)(lh.fusiform\_6)  
1907 0.92995 (lh.inferiortemporal\_3)(lh.middletemporal\_5)  
1908 0.92995 (lh.insula\_4)(lh.superiortemporal\_11)  
1909 0.92995 (lh.lateraloccipital\_3)(lh.pericalcarine\_1)  
1910 0.92995 (lh.lateralorbitofrontal\_6)(lh.lateralorbitofrontal\_7)(lh.parstriangularis\_3)(lh.rostralmiddlefrontal\_12)  
1911 0.92995 (lh.lateralorbitofrontal\_6)(lh.parstriangularis\_2)(lh.parstriangularis\_3)  
1912 0.92995 (lh.lateralorbitofrontal\_7)(lh.medialorbitofrontal\_2)(lh.rostralmiddlefrontal\_9)  
1913 0.92995 (lh.lateralorbitofrontal\_7)(lh.rostralanteriorcingulate\_1)  
1914 0.92995 (lh.lateralorbitofrontal\_7)(lh.rostralmiddlefrontal\_12)(lh.rostralmiddlefrontal\_9)  
1915 0.92995 (lh.middletemporal\_3)(lh.middletemporal\_4)  
1916 0.92995 (lh.precuneus\_10)(lh.superiorparietal\_11)  
1917 0.92995 (lh.rostralanteriorcingulate\_1)(lh.rostralmiddlefrontal\_9)(lh.superiorfrontal\_4)  
1918 0.92995 (lh.rostralmiddlefrontal\_12)(lh.superiorfrontal\_1)  
1919 0.92995 (lh.superiorfrontal\_14)(lh.superiorfrontal\_7)(lh.superiorfrontal\_9)  
1920 0.92995 (rh.fusiform\_1)(rh.lingual\_2)(rh.lingual\_4)  
1921 0.92995 (rh.fusiform\_1)(rh.pericalcarine\_1)  
1922 0.92995 (rh.fusiform\_3)(rh.inferiortemporal\_7)(rh.lateraloccipital\_10)  
1923 0.92995 (rh.fusiform\_8)(rh.inferiortemporal\_2)  
1924 0.92995 (rh.inferiortemporal\_1)(rh.insula\_5)  
1925 0.92995 (rh.inferiortemporal\_2)(rh.superiortemporal\_6)  
1926 0.92995 (rh.insula\_3)(rh.precentral\_10)  
1927 0.92995 (rh.lateralorbitofrontal\_1)(rh.lateralorbitofrontal\_4)  
1928 0.92995 (rh.lateralorbitofrontal\_2)(rh.lateralorbitofrontal\_7)(rh.rostralmiddlefrontal\_12)  
1929 0.92995 (rh.lateralorbitofrontal\_5)(rh.lateralorbitofrontal\_7)(rh.medialorbitofrontal\_2)  
1930 0.92995 (rh.lingual\_2)(rh.pericalcarine\_1)  
1931 0.92995 (rh.parsopercularis\_3)(rh.precentral\_1)  
1932 0.92995 (rh.parstriangularis\_1)(rh.parstriangularis\_4)(rh.rostralmiddlefrontal\_8)  
1933 0.92995 (rh.precuneus\_10)(rh.precuneus\_7)  
1934 0.92995 (rh.precuneus\_4)(rh.precuneus\_7)(rh.superiorparietal\_10)  
1935 0.92995 (rh.rostralmiddlefrontal\_1)(rh.rostralmiddlefrontal\_3)  
1936 0.92995 (rh.superiorfrontal\_3)(rh.superiorfrontal\_6)  
1937 0.92995 (rh.superiorparietal\_11)(rh.superiorparietal\_13)  
1938 0.92995 (rh.supramarginal\_6)(rh.supramarginal\_8)(rh.supramarginal\_9)  
1939 0.92995 (Right-Caudate)(rh.caudalmiddlefrontal\_1)  
1940 0.92995 (Right-Caudate)(rh.lateralorbitofrontal\_2)  
1941 0.92995 (Right-Caudate)(rh.lateralorbitofrontal\_7)  
1942 0.92995 (Right-Caudate)(rh.medialorbitofrontal\_5)  
1943 0.92995 (Right-Caudate)(Right-Hippocampus)(rh.supramarginal\_9)  
1944 0.92995 (Right-Caudate)(Right-Putamen)(rh.lateralorbitofrontal\_7)  
1945 0.92995 (Right-Hippocampus)(rh.superiortemporal\_1)(rh.superiortemporal\_3)  
1946 0.92995 (Right-Putamen)(rh.insula\_3)(rh.insula\_7)(rh.parsopercularis\_4)  
1947 0.92995 (Right-Putamen)(rh.lateralorbitofrontal\_2)(rh.parstriangularis\_1)(rh.rostralmiddlefrontal\_12)  
1948 0.92995 (Right-Putamen)(rh.postcentral\_1)(rh.supramarginal\_9)  
1949 0.92995 (Right-Putamen)(rh.posteriorcingulate\_4)  
1950 0.92995 (Right-Putamen)(rh.precentral\_1)

1951 0.92995 (Right-Putamen)(rh.rostralmiddlefrontal\_3)(rh.rostralmiddlefrontal\_8)  
1952 0.92995 (Right-Putamen)(Right-Thalamus-Proper)(rh.insula\_2)(rh.supramarginal\_9)  
1953 0.92995 (Right-Thalamus-Proper)(rh.insula\_2)(rh.supramarginal\_9)  
1954 0.92754 (Left-Caudate)(Left-Putamen)(lh.caudalanteriorcingulate\_2)(lh.rostralanteriorcingulate\_1)  
1955 0.92754 (Left-Caudate)(Left-Putamen)(lh.caudalmiddlefrontal\_3)(lh.caudalmiddlefrontal\_5)  
1956 0.92754 (Left-Caudate)(Left-Putamen)(lh.caudalmiddlefrontal\_4)(lh.caudalmiddlefrontal\_6)(lh.precentral\_11)  
1957 0.92754 (Left-Caudate)(Left-Putamen)(lh.caudalmiddlefrontal\_6)(lh.precentral\_9)  
1958 0.92754 (Left-Caudate)(Left-Putamen)(lh.parstriangularis\_3)(lh.rostralmiddlefrontal\_1)  
1959 0.92754 (Left-Caudate)(Left-Putamen)(lh.parstriangularis\_3)(lh.rostralmiddlefrontal\_9)  
1960 0.92754 (Left-Caudate)(Left-Putamen)(lh.rostralmiddlefrontal\_12)  
1961 0.92754 (Left-Caudate)(lh.caudalanteriorcingulate\_2)(lh.posteriorcingulate\_1)(lh.posteriorcingulate\_2)  
1962 0.92754 (Left-Caudate)(lh.caudalmiddlefrontal\_6)(lh.superiorfrontal\_12)  
1963 0.92754 (Left-Caudate)(lh.medialorbitofrontal\_4)(lh.medialorbitofrontal\_5)  
1964 0.92754 (Left-Caudate)(lh.parstriangularis\_3)(lh.rostralanteriorcingulate\_1)  
1965 0.92754 (Left-Putamen)(lh.caudalanteriorcingulate\_2)(lh.rostralanteriorcingulate\_1)  
1966 0.92754 (Left-Putamen)(lh.caudalmiddlefrontal\_3)(lh.caudalmiddlefrontal\_4)(lh.caudalmiddlefrontal\_5)  
1967 0.92754 (Left-Putamen)(lh.insula\_6)(lh.parstriangularis\_3)(lh.rostralmiddlefrontal\_1)  
1968 0.92754 (Left-Putamen)(lh.insula\_6)(lh.rostralmiddlefrontal\_4)  
1969 0.92754 (Left-Putamen)(lh.lateralorbitofrontal\_4)(lh.parstriangularis\_3)(lh.rostralmiddlefrontal\_9)  
1970 0.92754 (Left-Putamen)(lh.lateralorbitofrontal\_6)(lh.lateralorbitofrontal\_7)(lh.rostralmiddlefrontal\_12)  
1971 0.92754 (Left-Putamen)(lh.parsopercularis\_3)(lh.parstriangularis\_3)  
1972 0.92754 (Left-Putamen)(lh.postcentral\_3)  
1973 0.92754 (Left-Putamen)(lh.rostralanteriorcingulate\_1)(lh.superiorfrontal\_4)  
1974 0.92754 (Left-Putamen)(lh.rostralanteriorcingulate\_2)(lh.rostralmiddlefrontal\_4)  
1975 0.92754 (Left-Thalamus-Proper)(lh.isthmuscingulate\_2)(lh.isthmuscingulate\_3)  
1976 0.92754 (lh.bankssts\_3)(lh.fusiform\_5)  
1977 0.92754 (lh.caudalanteriorcingulate\_2)(lh.superiorfrontal\_10)(lh.superiorfrontal\_11)  
1978 0.92754 (lh.fusiform\_1)(lh.fusiform\_2)(lh.fusiform\_3)  
1979 0.92754 (lh.fusiform\_2)(lh.lateraloccipital\_7)(lh.pericalcarine\_3)  
1980 0.92754 (lh.fusiform\_5)(lh.fusiform\_7)  
1981 0.92754 (lh.inferiortemporal\_3)(lh.middletemporal\_3)  
1982 0.92754 (lh.insula\_1)(lh.supramarginal\_4)  
1983 0.92754 (lh.lateraloccipital\_1)(lh.lateraloccipital\_2)(lh.lateraloccipital\_3)  
1984 0.92754 (lh.lateralorbitofrontal\_4)(lh.parstriangularis\_3)(lh.rostralmiddlefrontal\_12)  
1985 0.92754 (lh.lateralorbitofrontal\_4)(lh.rostralmiddlefrontal\_12)(lh.rostralmiddlefrontal\_9)  
1986 0.92754 (lh.lateralorbitofrontal\_6)(lh.lateralorbitofrontal\_7)(lh.rostralmiddlefrontal\_9)  
1987 0.92754 (lh.lateralorbitofrontal\_6)(lh.rostralmiddlefrontal\_12)(lh.rostralmiddlefrontal\_6)  
1988 0.92754 (lh.medialorbitofrontal\_2)(lh.rostralanteriorcingulate\_1)(lh.rostralmiddlefrontal\_12)(lh.rostralmiddlefrontal\_9)  
1989 0.92754 (lh.parsopercularis\_3)(lh.parstriangularis\_3)(lh.rostralmiddlefrontal\_1)  
1990 0.92754 (lh.parsorbitalis\_1)(lh.parstriangularis\_1)  
1991 0.92754 (lh.pericalcarine\_1)(lh.pericalcarine\_3)  
1992 0.92754 (lh.postcentral\_14)(lh.supramarginal\_1)(lh.supramarginal\_2)  
1993 0.92754 (lh.rostralanteriorcingulate\_1)(lh.rostralmiddlefrontal\_12)(lh.superiorfrontal\_3)  
1994 0.92754 (lh.rostralanteriorcingulate\_2)(lh.rostralmiddlefrontal\_4)(lh.superiorfrontal\_4)  
1995 0.92754 (lh.rostralmiddlefrontal\_8)(lh.rostralmiddlefrontal\_9)(lh.superiorfrontal\_3)  
1996 0.92754 (lh.rostralmiddlefrontal\_9)(lh.superiorfrontal\_1)(lh.superiorfrontal\_3)  
1997 0.92754 (rh.bankssts\_2)(rh.superiortemporal\_3)(rh.superiortemporal\_9)  
1998 0.92754 (rh.fusiform\_1)(rh.fusiform\_2)(rh.lingual\_7)  
1999 0.92754 (rh.fusiform\_2)(rh.inferiorparietal\_10)  
2000 0.92754 (rh.fusiform\_2)(rh.lingual\_5)(rh.lingual\_7)



|      |         |                                                                                                                            |
|------|---------|----------------------------------------------------------------------------------------------------------------------------|
| 2001 | 0.92754 | (rh.fusiform_4)(rh.fusiform_6)                                                                                             |
| 2002 | 0.92754 | (rh.inferiortemporal_4)(rh.middletemporal_7)                                                                               |
| 2003 | 0.92754 | (rh.lateraloccipital_10)(rh.middletemporal_1)                                                                              |
| 2004 | 0.92754 | (rh.lateraloccipital_7)(rh.lingual_2)(rh.pericalcarine_3)                                                                  |
| 2005 | 0.92754 | (rh.lateralorbitofrontal_2)(rh.lateralorbitofrontal_4)                                                                     |
| 2006 | 0.92754 | (rh.lateralorbitofrontal_2)(rh.lateralorbitofrontal_6)(rh.parstriangularis_1)(rh.rostralmiddlefrontal_12)                  |
| 2007 | 0.92754 | (rh.lateralorbitofrontal_6)(rh.lateralorbitofrontal_7)(rh.rostralmiddlefrontal_13)                                         |
| 2008 | 0.92754 | (rh.lateralorbitofrontal_7)(rh.parstriangularis_1)                                                                         |
| 2009 | 0.92754 | (rh.middletemporal_5)(rh.middletemporal_7)                                                                                 |
| 2010 | 0.92754 | (rh.precentral_8)(rh.precentral_9)                                                                                         |
| 2011 | 0.92754 | (rh.superiorfrontal_10)(rh.superiorfrontal_13)                                                                             |
| 2012 | 0.92754 | (rh.superiorfrontal_3)(rh.superiorfrontal_4)(rh.superiorfrontal_5)                                                         |
| 2013 | 0.92754 | (rh.supramarginal_6)(rh.supramarginal_7)(rh.supramarginal_8)                                                               |
| 2014 | 0.92754 | (Right-Caudate)(rh.isthmuscingulate_1)                                                                                     |
| 2015 | 0.92754 | (Right-Caudate)(rh.superiorfrontal_5)                                                                                      |
| 2016 | 0.92754 | (Right-Caudate)(Right-Hippocampus)(Right-Putamen)(rh.supramarginal_9)                                                      |
| 2017 | 0.92754 | (Right-Caudate)(Right-Putamen)(rh.lateralorbitofrontal_2)                                                                  |
| 2018 | 0.92754 | (Right-Caudate)(Right-Putamen)(rh.posteriorcingulate_4)                                                                    |
| 2019 | 0.92754 | (Right-Hippocampus)(rh.inferiortemporal_2)                                                                                 |
| 2020 | 0.92754 | (Right-Hippocampus)(rh.isthmuscingulate_2)(rh.precuneus_7)                                                                 |
| 2021 | 0.92754 | (Right-Hippocampus)(rh.lingual_5)(rh.lingual_7)                                                                            |
| 2022 | 0.92512 | (Left-Accumbens-area)(lh.medialorbitofrontal_5)                                                                            |
| 2023 | 0.92512 | (Left-Accumbens-area)(lh.rostralanteriorcingulate_1)                                                                       |
| 2024 | 0.92512 | (Left-Caudate)(Left-Putamen)(lh.caudalanteriorcingulate_2)(lh.posteriorcingulate_3)                                        |
| 2025 | 0.92512 | (Left-Caudate)(Left-Putamen)(lh.insula_6)(lh.parstriangularis_3)                                                           |
| 2026 | 0.92512 | (Left-Caudate)(Left-Putamen)(lh.precentral_14)                                                                             |
| 2027 | 0.92512 | (Left-Caudate)(lh.caudalanteriorcingulate_1)(lh.caudalanteriorcingulate_2)(lh.rostralanteriorcingulate_1)                  |
| 2028 | 0.92512 | (Left-Caudate)(lh.caudalmiddlefrontal_3)(lh.insula_6)(lh.rostralmiddlefrontal_1)                                           |
| 2029 | 0.92512 | (Left-Caudate)(lh.medialorbitofrontal_2)(lh.rostralmiddlefrontal_12)                                                       |
| 2030 | 0.92512 | (Left-Caudate)(lh.rostralanteriorcingulate_1)(lh.rostralmiddlefrontal_12)                                                  |
| 2031 | 0.92512 | (Left-Caudate)(lh.rostralmiddlefrontal_12)(lh.rostralmiddlefrontal_9)                                                      |
| 2032 | 0.92512 | (Left-Caudate)(lh.rostralmiddlefrontal_4)(lh.superiorfrontal_10)                                                           |
| 2033 | 0.92512 | (Left-Hippocampus)(lh.inferiortemporal_1)                                                                                  |
| 2034 | 0.92512 | (Left-Putamen)(lh.caudalanteriorcingulate_2)(lh.posteriorcingulate_3)                                                      |
| 2035 | 0.92512 | (Left-Putamen)(lh.caudalmiddlefrontal_1)(lh.caudalmiddlefrontal_4)                                                         |
| 2036 | 0.92512 | (Left-Putamen)(lh.lateralorbitofrontal_4)(lh.lateralorbitofrontal_6)(lh.rostralmiddlefrontal_12)                           |
| 2037 | 0.92512 | (Left-Putamen)(lh.lateralorbitofrontal_4)(lh.rostralmiddlefrontal_12)(lh.rostralmiddlefrontal_9)                           |
| 2038 | 0.92512 | (Left-Putamen)(lh.lateralorbitofrontal_6)(lh.parstriangularis_3)(lh.rostralmiddlefrontal_12)                               |
| 2039 | 0.92512 | (Left-Putamen)(lh.parstriangularis_3)(lh.rostralmiddlefrontal_4)(lh.rostralmiddlefrontal_9)                                |
| 2040 | 0.92512 | (Left-Putamen)(lh.superiorfrontal_14)                                                                                      |
| 2041 | 0.92512 | (Left-Thalamus-Proper)(lh.postcentral_8)                                                                                   |
| 2042 | 0.92512 | (lh.bankssts_2)(lh.superiortemporal_6)                                                                                     |
| 2043 | 0.92512 | (lh.caudalanteriorcingulate_1)(lh.caudalanteriorcingulate_2)(lh.rostralanteriorcingulate_1)(lh.rostralanteriorcingulate_2) |
| 2044 | 0.92512 | (lh.caudalanteriorcingulate_1)(lh.caudalanteriorcingulate_2)(lh.rostralanteriorcingulate_1)                                |
| 2045 | 0.92512 | (lh.insula_1)(lh.precentral_7)                                                                                             |
| 2046 | 0.92512 | (lh.insula_4)(lh.temporalpole_1)                                                                                           |
| 2047 | 0.92512 | (lh.isthmuscingulate_2)(lh.precuneus_11)                                                                                   |
| 2048 | 0.92512 | (lh.lateralorbitofrontal_1)(lh.lateralorbitofrontal_3)                                                                     |
| 2049 | 0.92512 | (lh.lateralorbitofrontal_4)(lh.lateralorbitofrontal_7)(lh.parstriangularis_3)                                              |
| 2050 | 0.92512 | (lh.lingual_4)(lh.lingual_8)(lh.pericalcarine_3)                                                                           |

2051 0.92512 (lh.parstriangularis\_3)(lh.rostralanteriocingulate\_1)(lh.rostralmiddlefrontal\_12)  
2052 0.92512 (lh.pericalcarine\_1)(lh.superiorparietal\_14)  
2053 0.92512 (lh.precentral\_4)(lh.superiorfrontal\_14)  
2054 0.92512 (lh.precuneus\_11)(lh.superiorparietal\_11)  
2055 0.92512 (lh.rostralanteriocingulate\_2)(lh.rostralmiddlefrontal\_9)  
2056 0.92512 (lh.rostralmiddlefrontal\_1)(lh.rostralmiddlefrontal\_2)  
2057 0.92512 (lh.rostralmiddlefrontal\_12)(lh.superiorfrontal\_1)(lh.superiorfrontal\_3)  
2058 0.92512 (lh.rostralmiddlefrontal\_4)(lh.rostralmiddlefrontal\_8)(lh.superiorfrontal\_4)  
2059 0.92512 (lh.superiorfrontal\_13)(lh.superiorfrontal\_8)(lh.superiorfrontal\_9)  
2060 0.92512 (rh.bankssts\_2)(rh.inferiorparietal\_10)  
2061 0.92512 (rh.caudalmiddlefrontal\_3)(rh.caudalmiddlefrontal\_5)  
2062 0.92512 (rh.caudalmiddlefrontal\_4)(rh.parsopercularis\_4)(rh.rostralmiddlefrontal\_3)  
2063 0.92512 (rh.fusiform\_1)(rh.fusiform\_2)(rh.lateraloccipital\_8)  
2064 0.92512 (rh.fusiform\_1)(rh.lateraloccipital\_4)(rh.lateraloccipital\_7)  
2065 0.92512 (rh.fusiform\_3)(rh.fusiform\_4)(rh.lateraloccipital\_10)  
2066 0.92512 (rh.fusiform\_6)(rh.fusiform\_7)  
2067 0.92512 (rh.inferiorparietal\_1)(rh.superiorparietal\_1)(rh.superiorparietal\_7)  
2068 0.92512 (rh.insula\_1)(rh.postcentral\_1)  
2069 0.92512 (rh.isthmuscingulate\_2)(rh.precuneus\_3)(rh.precuneus\_4)  
2070 0.92512 (rh.lateraloccipital\_1)(rh.lateraloccipital\_3)(rh.lateraloccipital\_4)  
2071 0.92512 (rh.lateraloccipital\_1)(rh.pericalcarine\_4)  
2072 0.92512 (rh.lateralorbitofrontal\_4)(rh.lateralorbitofrontal\_7)  
2073 0.92512 (rh.lateralorbitofrontal\_6)(rh.lateralorbitofrontal\_7)(rh.parstriangularis\_1)  
2074 0.92512 (rh.lateralorbitofrontal\_6)(rh.parsorbitalis\_2)  
2075 0.92512 (rh.lateralorbitofrontal\_7)(rh.medialorbitofrontal\_2)(rh.rostralmiddlefrontal\_12)  
2076 0.92512 (rh.middletemporal\_6)(rh.middletemporal\_7)  
2077 0.92512 (rh.parsorbitalis\_2)(rh.rostralmiddlefrontal\_12)  
2078 0.92512 (rh.pericalcarine\_2)(rh.superiorparietal\_13)  
2079 0.92512 (rh.precuneus\_1)(rh.superiorparietal\_11)(rh.superiorparietal\_12)  
2080 0.92512 (rh.precuneus\_4)(rh.precuneus\_6)  
2081 0.92512 (rh.rostralmiddlefrontal\_11)(rh.rostralmiddlefrontal\_8)  
2082 0.92512 (rh.rostralmiddlefrontal\_3)(rh.rostralmiddlefrontal\_5)(rh.rostralmiddlefrontal\_6)  
2083 0.92512 (rh.rostralmiddlefrontal\_5)(rh.rostralmiddlefrontal\_6)(rh.rostralmiddlefrontal\_8)  
2084 0.92512 (rh.rostralmiddlefrontal\_9)(rh.superiorfrontal\_5)  
2085 0.92512 (rh.superiorfrontal\_6)(rh.superiorfrontal\_9)  
2086 0.92512 (Right-Caudate)(rh.lateralorbitofrontal\_5)  
2087 0.92512 (Right-Caudate)(rh.lateralorbitofrontal\_6)  
2088 0.92512 (Right-Caudate)(Right-Putamen)(rh.lateralorbitofrontal\_6)  
2089 0.92512 (Right-Caudate)(Right-Putamen)(rh.superiorfrontal\_2)  
2090 0.92512 (Right-Caudate)(Right-Thalamus-Proper)(rh.posteriorcingulate\_3)  
2091 0.92512 (Right-Hippocampus)(rh.fusiform\_7)  
2092 0.92512 (Right-Putamen)(rh.lateralorbitofrontal\_2)(rh.lateralorbitofrontal\_4)  
2093 0.92512 (Right-Putamen)(rh.parstriangularis\_1)(rh.rostralmiddlefrontal\_3)  
2094 0.92512 (Right-Putamen)(rh.rostralmiddlefrontal\_12)(rh.superiorfrontal\_2)  
2095 0.92512 (Right-Putamen)(rh.superiorparietal\_1)(rh.supramarginal\_1)  
2096 0.92512 (Right-Thalamus-Proper)(rh.posteriorcingulate\_3)  
2097 0.92271 (Left-Amygdala)(Left-Hippocampus)(lh.entorhinal\_1)  
2098 0.92271 (Left-Amygdala)(Left-Putamen)(lh.insula\_4)  
2099 0.92271 (Left-Caudate)(Left-Putamen)(lh.caudalmiddlefrontal\_3)(lh.rostralmiddlefrontal\_4)  
2100 0.92271 (Left-Caudate)(Left-Putamen)(lh.caudalmiddlefrontal\_4)(lh.caudalmiddlefrontal\_5)(lh.caudalmiddlefrontal\_6)

2101 0.92271 (Left-Caudate)(Left-Thalamus-Proper)(lh.paracentral\_5)  
2102 0.92271 (Left-Caudate)(Left-Thalamus-Proper)(lh.precentral\_11)(lh.precentral\_7)  
2103 0.92271 (Left-Caudate)(lh.caudalanteriorcingulate\_1)(lh.caudalanteriorcingulate\_2)(lh.rostralanteriorcingulate\_1)(lh.rostralanteriorcingulate\_2)  
2104 0.92271 (Left-Caudate)(lh.caudalanteriorcingulate\_2)(lh.superiorfrontal\_11)(lh.superiorfrontal\_8)  
2105 0.92271 (Left-Caudate)(lh.isthmuscingulate\_1)  
2106 0.92271 (Left-Caudate)(lh.lateralorbitofrontal\_6)  
2107 0.92271 (Left-Caudate)(lh.lateralorbitofrontal\_7)(lh.medialorbitofrontal\_4)  
2108 0.92271 (Left-Caudate)(lh.paracentral\_5)(lh.superiorfrontal\_12)  
2109 0.92271 (Left-Caudate)(lh.rostralmiddlefrontal\_4)(lh.superiorfrontal\_11)  
2110 0.92271 (Left-Caudate)(lh.superiorfrontal\_10)(lh.superiorfrontal\_8)  
2111 0.92271 (Left-Caudate)(lh.superiorfrontal\_11)(lh.superiorfrontal\_12)(lh.superiorfrontal\_8)  
2112 0.92271 (Left-Caudate)(lh.superiorfrontal\_12)(lh.superiorfrontal\_14)(lh.superiorfrontal\_8)  
2113 0.92271 (Left-Putamen)(Left-Thalamus-Proper)(lh.postcentral\_8)  
2114 0.92271 (Left-Putamen)(lh.insula\_1)(lh.insula\_2)(lh.precentral\_11)  
2115 0.92271 (Left-Putamen)(lh.insula\_1)(lh.precentral\_7)  
2116 0.92271 (Left-Putamen)(lh.lateralorbitofrontal\_7)(lh.rostralanteriorcingulate\_1)  
2117 0.92271 (Left-Putamen)(lh.lateralorbitofrontal\_7)(lh.rostralmiddlefrontal\_12)(lh.rostralmiddlefrontal\_9)  
2118 0.92271 (Left-Putamen)(lh.medialorbitofrontal\_2)(lh.rostralanteriorcingulate\_1)(lh.rostralmiddlefrontal\_12)  
2119 0.92271 (Left-Putamen)(lh.parsopercularis\_1)(lh.parstriangularis\_3)(lh.rostralmiddlefrontal\_1)  
2120 0.92271 (Left-Putamen)(lh.parstriangularis\_3)(lh.rostralmiddlefrontal\_1)(lh.rostralmiddlefrontal\_4)  
2121 0.92271 (Left-Putamen)(lh.posteriorcingulate\_3)(lh.precentral\_4)  
2122 0.92271 (lh.caudalanteriorcingulate\_2)(lh.posteriorcingulate\_3)(lh.superiorfrontal\_14)  
2123 0.92271 (lh.caudalanteriorcingulate\_2)(lh.superiorfrontal\_11)(lh.superiorfrontal\_12)(lh.superiorfrontal\_14)(lh.superiorfrontal\_8)  
2124 0.92271 (lh.caudalmiddlefrontal\_1)(lh.caudalmiddlefrontal\_2)  
2125 0.92271 (lh.caudalmiddlefrontal\_1)(lh.rostralmiddlefrontal\_3)  
2126 0.92271 (lh.caudalmiddlefrontal\_3)(lh.superiorfrontal\_12)  
2127 0.92271 (lh.fusiform\_1)(lh.fusiform\_3)(lh.fusiform\_5)  
2128 0.92271 (lh.fusiform\_2)(lh.lateraloccipital\_7)(lh.lateraloccipital\_9)  
2129 0.92271 (lh.inferiorparietal\_9)(lh.supramarginal\_9)  
2130 0.92271 (lh.inferiortemporal\_6)(lh.inferiortemporal\_8)  
2131 0.92271 (lh.insula\_1)(lh.insula\_2)(lh.precentral\_11)  
2132 0.92271 (lh.isthmuscingulate\_2)(lh.isthmuscingulate\_3)(lh.precuneus\_11)  
2133 0.92271 (lh.lateraloccipital\_1)(lh.lateraloccipital\_3)(lh.pericalcarine\_2)  
2134 0.92271 (lh.lateralorbitofrontal\_4)(lh.lateralorbitofrontal\_6)(lh.parstriangularis\_3)(lh.rostralmiddlefrontal\_12)  
2135 0.92271 (lh.lateralorbitofrontal\_6)(lh.rostralmiddlefrontal\_11)  
2136 0.92271 (lh.lateralorbitofrontal\_7)(lh.medialorbitofrontal\_1)  
2137 0.92271 (lh.medialorbitofrontal\_2)(lh.superiorfrontal\_3)(lh.superiorfrontal\_4)  
2138 0.92271 (lh.medialorbitofrontal\_2)(lh.superiorfrontal\_4)  
2139 0.92271 (lh.paracentral\_5)(lh.superiorfrontal\_12)(lh.superiorfrontal\_14)  
2140 0.92271 (lh.precuneus\_10)(lh.precuneus\_11)(lh.precuneus\_6)  
2141 0.92271 (lh.precuneus\_11)(lh.precuneus\_6)(lh.precuneus\_9)  
2142 0.92271 (lh.rostralanteriorcingulate\_2)(lh.superiorfrontal\_8)  
2143 0.92271 (lh.superiorfrontal\_10)(lh.superiorfrontal\_3)(lh.superiorfrontal\_4)  
2144 0.92271 (lh.superiorfrontal\_10)(lh.superiorfrontal\_3)  
2145 0.92271 (lh.superiorfrontal\_10)(lh.superiorfrontal\_7)(lh.superiorfrontal\_9)  
2146 0.92271 (lh.superiorfrontal\_10)(lh.superiorfrontal\_9)  
2147 0.92271 (lh.superiorfrontal\_11)(lh.superiorfrontal\_13)  
2148 0.92271 (lh.superiorfrontal\_14)(lh.superiorfrontal\_4)(lh.superiorfrontal\_8)  
2149 0.92271 (lh.superiorfrontal\_14)(lh.superiorfrontal\_4)  
2150 0.92271 (lh.superiorparietal\_11)(lh.superiorparietal\_5)(lh.superiorparietal\_6)

2151 0.92271 (rh.bankssts\_3)(rh.superiortemporal\_3)  
2152 0.92271 (rh.fusiform\_1)(rh.inferiorparietal\_10)  
2153 0.92271 (rh.inferiorparietal\_12)(rh.lateraloccipital\_4)(rh.lateraloccipital\_8)  
2154 0.92271 (rh.inferiortemporal\_2)(rh.middletemporal\_9)  
2155 0.92271 (rh.inferiortemporal\_4)(rh.inferiortemporal\_5)(rh.middletemporal\_6)  
2156 0.92271 (rh.insula\_3)(rh.precentral\_5)  
2157 0.92271 (rh.insula\_7)(rh.lateralorbitofrontal\_2)  
2158 0.92271 (rh.lateralorbitofrontal\_2)(rh.lateralorbitofrontal\_6)(rh.lateralorbitofrontal\_7)(rh.rostralmiddlefrontal\_12)  
2159 0.92271 (rh.lateralorbitofrontal\_6)(rh.parstriangularis\_1)(rh.parstriangularis\_4)(rh.rostralmiddlefrontal\_12)  
2160 0.92271 (rh.lingual\_4)(rh.lingual\_5)  
2161 0.92271 (rh.lingual\_4)(rh.pericalcarine\_1)  
2162 0.92271 (rh.paracentral\_6)(rh.precentral\_13)  
2163 0.92271 (rh.parsopercularis\_4)(rh.parstriangularis\_1)  
2164 0.92271 (rh.parstriangularis\_4)(rh.rostralmiddlefrontal\_12)(rh.rostralmiddlefrontal\_8)  
2165 0.92271 (rh.posteriorcingulate\_2)(rh.superiorfrontal\_11)  
2166 0.92271 (rh.precuneus\_10)(rh.precuneus\_8)  
2167 0.92271 (rh.precuneus\_4)(rh.superiorparietal\_10)(rh.superiorparietal\_11)  
2168 0.92271 (rh.rostralmiddlefrontal\_12)(rh.rostralmiddlefrontal\_3)  
2169 0.92271 (rh.rostralmiddlefrontal\_7)(rh.rostralmiddlefrontal\_8)  
2170 0.92271 (rh.superiorfrontal\_11)(rh.superiorfrontal\_7)(rh.superiorfrontal\_8)(rh.superiorfrontal\_9)  
2171 0.92271 (rh.superiorfrontal\_11)(rh.superiorfrontal\_7)(rh.superiorfrontal\_8)  
2172 0.92271 (rh.superiorfrontal\_11)(rh.superiorfrontal\_7)(rh.superiorfrontal\_9)  
2173 0.92271 (rh.superiorfrontal\_11)(rh.superiorfrontal\_7)  
2174 0.92271 (rh.superiorfrontal\_13)(rh.superiorfrontal\_7)  
2175 0.92271 (rh.superiorfrontal\_13)(rh.superiorfrontal\_8)(rh.superiorfrontal\_9)  
2176 0.92271 (rh.superiorparietal\_1)(rh.superiorparietal\_10)  
2177 0.92271 (Right-Amygdala)(rh.inferiortemporal\_1)(rh.insula\_5)  
2178 0.92271 (Right-Caudate)(rh.caudalmiddlefrontal\_4)(rh.superiorfrontal\_7)  
2179 0.92271 (Right-Caudate)(rh.lateralorbitofrontal\_7)(rh.medialorbitofrontal\_2)  
2180 0.92271 (Right-Caudate)(rh.rostralmiddlefrontal\_5)  
2181 0.92271 (Right-Hippocampus)(rh.bankssts\_2)(rh.superiortemporal\_1)  
2182 0.92271 (Right-Putamen)(rh.insula\_3)(rh.precentral\_10)  
2183 0.92271 (Right-Putamen)(rh.insula\_3)(rh.precentral\_5)  
2184 0.92271 (Right-Putamen)(rh.insula\_7)(rh.lateralorbitofrontal\_2)  
2185 0.92271 (Right-Putamen)(rh.lateralorbitofrontal\_2)(rh.lateralorbitofrontal\_7)(rh.rostralmiddlefrontal\_12)  
2186 0.92271 (Right-Putamen)(rh.supramarginal\_8)(rh.supramarginal\_9)  
2187 0.92271 (Right-Putamen)(rh.supramarginal\_8)  
2188 0.92271 (Right-Thalamus-Proper)(rh.precentral\_11)  
2189 0.92029 (Left-Caudate)(Left-Pallidum)(Left-Putamen)(Left-Thalamus-Proper)(lh.precentral\_11)  
2190 0.92029 (Left-Caudate)(Left-Pallidum)(Left-Thalamus-Proper)(lh.precentral\_11)  
2191 0.92029 (Left-Caudate)(Left-Putamen)(Left-Thalamus-Proper)(lh.precentral\_11)(lh.precentral\_7)  
2192 0.92029 (Left-Caudate)(Left-Putamen)(lh.rostralanteriorcingulate\_1)(lh.superiorfrontal\_4)  
2193 0.92029 (Left-Caudate)(Left-Putamen)(lh.rostralmiddlefrontal\_12)(lh.rostralmiddlefrontal\_9)  
2194 0.92029 (Left-Caudate)(lh.caudalmiddlefrontal\_1)(lh.rostralmiddlefrontal\_4)  
2195 0.92029 (Left-Caudate)(lh.lateralorbitofrontal\_7)(lh.parstriangularis\_3)  
2196 0.92029 (Left-Caudate)(lh.lateralorbitofrontal\_7)(lh.rostralmiddlefrontal\_9)  
2197 0.92029 (Left-Caudate)(lh.superiorfrontal\_11)(lh.superiorfrontal\_4)(lh.superiorfrontal\_8)  
2198 0.92029 (Left-Caudate)(lh.supramarginal\_1)  
2199 0.92029 (Left-Caudate)(rh.caudalanteriorcingulate\_1)  
2200 0.92029 (Left-Hippocampus)(lh.inferiorparietal\_5)(lh.superiortemporal\_2)

2201 0.92029 (Left-Pallidum)(Left-Putamen)(Left-Thalamus-Proprius)(lh.precentral\_11)  
2202 0.92029 (Left-Pallidum)(Left-Thalamus-Proprius)(lh.precentral\_11)  
2203 0.92029 (Left-Pallidum)(lh.precentral\_4)  
2204 0.92029 (Left-Putamen)(lh.caudalanteriorcingulate\_1)(lh.rostralanteriorcingulate\_1)(lh.rostralanteriorcingulate\_2)  
2205 0.92029 (Left-Putamen)(lh.lateralorbitofrontal\_1)(lh.lateralorbitofrontal\_3)  
2206 0.92029 (Left-Putamen)(lh.lateralorbitofrontal\_6)(lh.parstriangularis\_3)(lh.rostralmiddlefrontal\_12)(lh.rostralmiddlefrontal\_9)  
2207 0.92029 (Left-Putamen)(lh.postcentral\_8)(lh.precentral\_4)  
2208 0.92029 (Left-Putamen)(lh.superiorfrontal\_11)(lh.superiorfrontal\_4)  
2209 0.92029 (lh.caudalanteriorcingulate\_2)(lh.superiorfrontal\_10)(lh.superiorfrontal\_11)(lh.superiorfrontal\_8)  
2210 0.92029 (lh.caudalanteriorcingulate\_2)(lh.superiorfrontal\_4)  
2211 0.92029 (lh.caudalmiddlefrontal\_1)(lh.caudalmiddlefrontal\_4)(lh.caudalmiddlefrontal\_5)  
2212 0.92029 (lh.caudalmiddlefrontal\_3)(lh.rostralmiddlefrontal\_3)(lh.rostralmiddlefrontal\_4)  
2213 0.92029 (lh.cuneus\_1)(lh.pericalcarine\_1)(lh.superiorparietal\_12)  
2214 0.92029 (lh.insula\_6)(lh.parsopercularis\_1)(lh.parsopercularis\_3)(lh.rostralmiddlefrontal\_1)  
2215 0.92029 (lh.isthmuscingulate\_2)(lh.superiorparietal\_5)  
2216 0.92029 (lh.lateraloccipital\_2)(lh.lateraloccipital\_3)(lh.pericalcarine\_2)(lh.pericalcarine\_3)  
2217 0.92029 (lh.lateraloccipital\_2)(lh.lateraloccipital\_6)(lh.pericalcarine\_3)  
2218 0.92029 (lh.lateraloccipital\_6)(lh.lingual\_1)(lh.pericalcarine\_2)  
2219 0.92029 (lh.lateraloccipital\_7)(lh.lingual\_8)  
2220 0.92029 (lh.lateralorbitofrontal\_2)(lh.medialorbitofrontal\_2)  
2221 0.92029 (lh.lateralorbitofrontal\_6)(lh.lateralorbitofrontal\_7)(lh.parstriangularis\_3)(lh.rostralmiddlefrontal\_9)  
2222 0.92029 (lh.lateralorbitofrontal\_7)(lh.medialorbitofrontal\_2)(lh.rostralanteriorcingulate\_1)  
2223 0.92029 (lh.lateralorbitofrontal\_7)(lh.medialorbitofrontal\_2)(lh.rostralmiddlefrontal\_12)(lh.rostralmiddlefrontal\_9)  
2224 0.92029 (lh.lingual\_1)(lh.lingual\_3)(lh.pericalcarine\_3)  
2225 0.92029 (lh.lingual\_6)(lh.lingual\_8)(lh.pericalcarine\_3)  
2226 0.92029 (lh.parsopercularis\_2)(lh.rostralmiddlefrontal\_1)  
2227 0.92029 (lh.parstriangularis\_3)(lh.rostralanteriorcingulate\_1)(lh.rostralmiddlefrontal\_12)(lh.rostralmiddlefrontal\_9)  
2228 0.92029 (lh.parstriangularis\_3)(lh.rostralmiddlefrontal\_12)(lh.rostralmiddlefrontal\_6)  
2229 0.92029 (lh.postcentral\_8)(lh.precentral\_11)  
2230 0.92029 (lh.precuneus\_10)(lh.precuneus\_6)(lh.precuneus\_8)  
2231 0.92029 (lh.precuneus\_10)(lh.precuneus\_9)(lh.superiorparietal\_11)  
2232 0.92029 (lh.precuneus\_6)(lh.precuneus\_8)(lh.superiorparietal\_11)  
2233 0.92029 (lh.precuneus\_7)(lh.precuneus\_8)  
2234 0.92029 (lh.rostralmiddlefrontal\_4)(lh.superiorfrontal\_11)(lh.superiorfrontal\_4)  
2235 0.92029 (lh.superiorfrontal\_1)(lh.superiorfrontal\_2)(lh.superiorfrontal\_3)  
2236 0.92029 (lh.superiorfrontal\_1)(lh.superiorfrontal\_2)  
2237 0.92029 (lh.superiorfrontal\_6)(lh.superiorfrontal\_8)  
2238 0.92029 (rh.caudalmiddlefrontal\_5)(rh.superiorfrontal\_7)  
2239 0.92029 (rh.fusiform\_3)(rh.fusiform\_5)  
2240 0.92029 (rh.inferiorparietal\_10)(rh.inferiorparietal\_12)(rh.lateraloccipital\_8)  
2241 0.92029 (rh.inferiorparietal\_10)(rh.insula\_2)  
2242 0.92029 (rh.insula\_1)(rh.supramarginal\_1)(rh.supramarginal\_8)  
2243 0.92029 (rh.lateraloccipital\_8)(rh.lingual\_5)(rh.lingual\_7)  
2244 0.92029 (rh.lateralorbitofrontal\_2)(rh.rostralmiddlefrontal\_8)  
2245 0.92029 (rh.middletemporal\_9)(rh.superiortemporal\_10)  
2246 0.92029 (rh.pericalcarine\_2)(rh.precuneus\_1)  
2247 0.92029 (rh.precentral\_13)(rh.superiorfrontal\_17)  
2248 0.92029 (rh.superiorfrontal\_10)(rh.superiorfrontal\_11)(rh.superiorfrontal\_13)  
2249 0.92029 (rh.superiorfrontal\_5)(rh.superiorfrontal\_6)(rh.superiorfrontal\_9)  
2250 0.92029 (rh.superiorfrontal\_6)(rh.superiorfrontal\_7)(rh.superiorfrontal\_9)

2251 0.92029 (rh.superiorfrontal\_6)(rh.superiorfrontal\_8)(rh.superiorfrontal\_9)  
2252 0.92029 (rh.superiorparietal\_1)(rh.superiorparietal\_6)  
2253 0.92029 (Right-Caudate)(Right-Putamen)(rh.lateralorbitofrontal\_7)(rh.medialorbitofrontal\_2)  
2254 0.92029 (Right-Hippocampus)(rh.parahippocampal\_1)  
2255 0.92029 (Right-Hippocampus)(rh.superiortemporal\_10)  
2256 0.92029 (Right-Hippocampus)(rh.superiortemporal\_6)  
2257 0.92029 (Right-Putamen)(rh.lateralorbitofrontal\_2)(rh.rostralmiddlefrontal\_8)  
2258 0.92029 (Right-Putamen)(rh.lateralorbitofrontal\_4)(rh.lateralorbitofrontal\_7)  
2259 0.92029 (Right-Putamen)(rh.lateralorbitofrontal\_5)(rh.medialorbitofrontal\_2)  
2260 0.92029 (Right-Putamen)(rh.lateralorbitofrontal\_7)(rh.medialorbitofrontal\_2)(rh.rostralmiddlefrontal\_12)  
2261 0.92029 (Right-Putamen)(rh.rostralmiddlefrontal\_13)  
2262 0.91787 (Left-Accumbens-area)(Left-Caudate)(lh.rostralanteriocingulate\_1)  
2263 0.91787 (Left-Amygdala)(lh.insula\_4)(lh.temporalpole\_1)  
2264 0.91787 (Left-Caudate)(Left-Putamen)(lh.caudalanteriocingulate\_1)(lh.rostralanteriocingulate\_1)(lh.rostralanteriocingulate\_2)  
2265 0.91787 (Left-Caudate)(Left-Putamen)(lh.medialorbitofrontal\_2)(lh.rostralanteriocingulate\_1)(lh.rostralmiddlefrontal\_9)  
2266 0.91787 (Left-Caudate)(Left-Putamen)(lh.posteriorcingulate\_3)(lh.precentral\_4)  
2267 0.91787 (Left-Caudate)(Left-Putamen)(lh.precentral\_11)(lh.precentral\_4)(lh.precentral\_7)  
2268 0.91787 (Left-Caudate)(Left-Putamen)(lh.rostralmiddlefrontal\_1)(lh.rostralmiddlefrontal\_4)(lh.rostralmiddlefrontal\_9)  
2269 0.91787 (Left-Caudate)(Left-Putamen)(lh.superiorfrontal\_14)  
2270 0.91787 (Left-Caudate)(Left-Thalamus-Proper)(lh.precentral\_4)(lh.precentral\_7)  
2271 0.91787 (Left-Caudate)(lh.caudalanteriocingulate\_2)(lh.superiorfrontal\_14)(lh.superiorfrontal\_8)  
2272 0.91787 (Left-Caudate)(lh.caudalmiddlefrontal\_1)(lh.caudalmiddlefrontal\_5)  
2273 0.91787 (Left-Caudate)(lh.caudalmiddlefrontal\_3)(lh.caudalmiddlefrontal\_4)(lh.caudalmiddlefrontal\_5)  
2274 0.91787 (Left-Caudate)(lh.caudalmiddlefrontal\_3)(lh.superiorfrontal\_12)  
2275 0.91787 (Left-Caudate)(lh.insula\_1)(lh.postcentral\_8)  
2276 0.91787 (Left-Caudate)(Right-Caudate)(rh.caudalanteriocingulate\_1)  
2277 0.91787 (Left-Hippocampus)(lh.bankssts\_3)(lh.superiortemporal\_2)  
2278 0.91787 (Left-Hippocampus)(lh.superiortemporal\_3)(lh.superiortemporal\_8)  
2279 0.91787 (Left-Pallidum)(Left-Putamen)(lh.precentral\_4)  
2280 0.91787 (Left-Putamen)(lh.caudalmiddlefrontal\_3)(lh.superiorfrontal\_11)  
2281 0.91787 (Left-Putamen)(lh.lateralorbitofrontal\_6)(lh.lateralorbitofrontal\_7)(lh.parstriangularis\_3)  
2282 0.91787 (Left-Putamen)(lh.lateralorbitofrontal\_7)(lh.parstriangularis\_3)(lh.rostralmiddlefrontal\_12)  
2283 0.91787 (Left-Putamen)(lh.postcentral\_8)(lh.precentral\_14)  
2284 0.91787 (Left-Putamen)(lh.precentral\_12)(lh.precentral\_14)  
2285 0.91787 (Left-Putamen)(lh.rostralmiddlefrontal\_8)  
2286 0.91787 (Left-Putamen)(lh.superiorfrontal\_11)(lh.superiorfrontal\_12)  
2287 0.91787 (Left-Thalamus-Proper)(lh.precentral\_9)  
2288 0.91787 (lh.bankssts\_2)(lh.middletemporal\_3)  
2289 0.91787 (lh.fusiform\_2)(lh.lingual\_4)(lh.pericalcarine\_3)  
2290 0.91787 (lh.inferiorparietal\_9)(lh.superiorparietal\_11)  
2291 0.91787 (lh.insula\_6)(lh.parsopercularis\_1)(lh.parsopercularis\_3)(lh.parstriangularis\_3)  
2292 0.91787 (lh.lateraloccipital\_2)(lh.superiorparietal\_12)  
2293 0.91787 (lh.lateraloccipital\_6)(lh.pericalcarine\_2)(lh.pericalcarine\_3)  
2294 0.91787 (lh.lateralorbitofrontal\_4)(lh.lateralorbitofrontal\_6)(lh.lateralorbitofrontal\_7)(lh.parstriangularis\_3)  
2295 0.91787 (lh.lateralorbitofrontal\_4)(lh.lateralorbitofrontal\_6)(lh.rostralmiddlefrontal\_12)(lh.rostralmiddlefrontal\_9)  
2296 0.91787 (lh.lateralorbitofrontal\_6)(lh.rostralmiddlefrontal\_12)(lh.rostralmiddlefrontal\_6)(lh.rostralmiddlefrontal\_9)  
2297 0.91787 (lh.lingual\_7)(lh.lingual\_8)  
2298 0.91787 (lh.medialorbitofrontal\_2)(lh.rostralanteriocingulate\_1)(lh.rostralmiddlefrontal\_9)(lh.superiorfrontal\_3)  
2299 0.91787 (lh.paracentral\_4)(lh.superiorfrontal\_15)(lh.superiorfrontal\_16)  
2300 0.91787 (lh.precuneus\_3)(lh.precuneus\_6)(lh.superiorparietal\_5)

2301 0.91787 (lh.rostralmiddlefrontal\_2)(lh.rostralmiddlefrontal\_4)  
2302 0.91787 (lh.superiorfrontal\_13)(lh.superiorfrontal\_14)(lh.superiorfrontal\_8)(lh.superiorfrontal\_9)  
2303 0.91787 (lh.superiorfrontal\_2)(lh.superiorfrontal\_5)  
2304 0.91787 (lh.superiorfrontal\_4)(lh.superiorfrontal\_6)(lh.superiorfrontal\_8)  
2305 0.91787 (rh.bankssts\_2)(rh.insula\_2)  
2306 0.91787 (rh.caudalmiddlefrontal\_4)(rh.insula\_3)(rh.insula\_7)  
2307 0.91787 (rh.cuneus\_4)(rh.pericalcarine\_2)  
2308 0.91787 (rh.fusiform\_1)(rh.fusiform\_2)(rh.lateraloccipital\_10)(rh.lateraloccipital\_8)  
2309 0.91787 (rh.fusiform\_1)(rh.lateraloccipital\_4)(rh.lateraloccipital\_7)(rh.lateraloccipital\_8)  
2310 0.91787 (rh.fusiform\_8)(rh.insula\_5)  
2311 0.91787 (rh.inferiorparietal\_10)(rh.inferiorparietal\_4)(rh.inferiorparietal\_8)  
2312 0.91787 (rh.inferiorparietal\_10)(rh.lingual\_7)  
2313 0.91787 (rh.inferiortemporal\_2)(rh.inferiortemporal\_4)  
2314 0.91787 (rh.inferiortemporal\_4)(rh.middletemporal\_4)(rh.middletemporal\_6)  
2315 0.91787 (rh.insula\_1)(rh.insula\_3)(rh.supramarginal\_9)  
2316 0.91787 (rh.insula\_3)(rh.supramarginal\_9)  
2317 0.91787 (rh.lateraloccipital\_10)(rh.lateraloccipital\_7)  
2318 0.91787 (rh.lateralorbitofrontal\_6)(rh.parstriangularis\_1)(rh.parstriangularis\_3)  
2319 0.91787 (rh.lateralorbitofrontal\_7)(rh.parstriangularis\_1)(rh.rostralmiddlefrontal\_12)  
2320 0.91787 (rh.parsopercularis\_1)(rh.parstriangularis\_2)  
2321 0.91787 (rh.parstriangularis\_2)(rh.parstriangularis\_3)  
2322 0.91787 (rh.parstriangularis\_2)(rh.parstriangularis\_4)(rh.rostralmiddlefrontal\_3)  
2323 0.91787 (rh.parstriangularis\_3)(rh.parstriangularis\_4)  
2324 0.91787 (rh.postcentral\_10)(rh.postcentral\_8)  
2325 0.91787 (rh.precentral\_13)(rh.precentral\_14)  
2326 0.91787 (rh.precuneus\_1)(rh.precuneus\_4)(rh.superiorparietal\_11)  
2327 0.91787 (rh.precuneus\_7)(rh.superiorparietal\_10)(rh.superiorparietal\_7)  
2328 0.91787 (rh.superiorfrontal\_11)(rh.superiorfrontal\_13)(rh.superiorfrontal\_8)(rh.superiorfrontal\_9)  
2329 0.91787 (rh.superiorparietal\_1)(rh.superiorparietal\_10)(rh.superiorparietal\_7)  
2330 0.91787 (Right-Caudate)(Right-Thalamus-Proper)(rh.supramarginal\_9)  
2331 0.91787 (Right-Hippocampus)(rh.bankssts\_2)(rh.superiortemporal\_3)(rh.superiortemporal\_9)  
2332 0.91787 (Right-Hippocampus)(rh.isthmuscingulate\_1)  
2333 0.91787 (Right-Hippocampus)(Right-Putamen)(Right-Thalamus-Proper)(rh.insula\_2)(rh.supramarginal\_9)  
2334 0.91787 (Right-Hippocampus)(Right-Thalamus-Proper)(rh.insula\_2)(rh.supramarginal\_9)  
2335 0.91787 (Right-Putamen)(rh.caudalmiddlefrontal\_4)(rh.insula\_3)(rh.insula\_7)  
2336 0.91787 (Right-Putamen)(rh.insula\_1)(rh.insula\_3)(rh.supramarginal\_9)  
2337 0.91787 (Right-Putamen)(rh.insula\_3)(rh.supramarginal\_9)  
2338 0.91787 (Right-Putamen)(rh.lateralorbitofrontal\_2)(rh.lateralorbitofrontal\_6)(rh.parstriangularis\_1)(rh.rostralmiddlefrontal\_12)  
2339 0.91787 (Right-Putamen)(rh.lateralorbitofrontal\_7)(rh.parstriangularis\_1)  
2340 0.91787 (Right-Putamen)(rh.rostralmiddlefrontal\_1)  
2341 0.91787 (Right-Putamen)(rh.superiorfrontal\_13)  
2342 0.91546 (Left-Accumbens-area)(Left-Putamen)(lh.rostralanteriorcingulate\_1)  
2343 0.91546 (Left-Caudate)(Left-Pallidum)(lh.precentral\_4)  
2344 0.91546 (Left-Caudate)(Left-Putamen)(Left-Thalamus-Proper)(lh.precentral\_4)(lh.precentral\_7)  
2345 0.91546 (Left-Caudate)(Left-Putamen)(lh.caudalmiddlefrontal\_3)(lh.superiorfrontal\_11)  
2346 0.91546 (Left-Caudate)(Left-Putamen)(lh.parsopercularis\_3)(lh.rostralmiddlefrontal\_1)  
2347 0.91546 (Left-Caudate)(Left-Putamen)(lh.parstriangularis\_3)(lh.rostralanteriorcingulate\_1)  
2348 0.91546 (Left-Caudate)(Left-Putamen)(lh.rostralanteriorcingulate\_1)(lh.rostralmiddlefrontal\_12)  
2349 0.91546 (Left-Caudate)(Left-Putamen)(lh.rostralanteriorcingulate\_2)(lh.rostralmiddlefrontal\_4)  
2350 0.91546 (Left-Caudate)(Left-Putamen)(lh.rostralanteriorcingulate\_2)(lh.superiorfrontal\_4)

2351 0.91546 (Left-Caudate)(Left-Putamen)(lh.rostralmiddlefrontal\_4)(lh.superiorfrontal\_4)  
2352 0.91546 (Left-Caudate)(lh.caudalmiddlefrontal\_1)(lh.caudalmiddlefrontal\_3)(lh.caudalmiddlefrontal\_4)  
2353 0.91546 (Left-Caudate)(lh.lateralorbitofrontal\_7)(lh.rostralanteriocingulate\_1)  
2354 0.91546 (Left-Caudate)(lh.lateralorbitofrontal\_7)(lh.rostralmiddlefrontal\_12)  
2355 0.91546 (Left-Caudate)(lh.parstriangularis\_3)(lh.rostralanteriocingulate\_1)(lh.rostralmiddlefrontal\_9)  
2356 0.91546 (Left-Caudate)(lh.parstriangularis\_3)(lh.rostralmiddlefrontal\_1)(lh.rostralmiddlefrontal\_4)  
2357 0.91546 (Left-Caudate)(lh.postcentral\_3)  
2358 0.91546 (Left-Caudate)(lh.precentral\_11)(lh.precentral\_14)  
2359 0.91546 (Left-Caudate)(lh.rostralmiddlefrontal\_8)  
2360 0.91546 (Left-Caudate)(lh.rostralmiddlefrontal\_9)(lh.superiorfrontal\_4)  
2361 0.91546 (Left-Caudate)(Right-Caudate)(lh.caudalanteriocingulate\_2)  
2362 0.91546 (Left-Putamen)(Left-Thalamus-Proper)(lh.precentral\_9)  
2363 0.91546 (Left-Putamen)(lh.caudalanteriocingulate\_2)(lh.rostralanteriocingulate\_1)(lh.rostralanteriocingulate\_2)  
2364 0.91546 (Left-Putamen)(lh.insula\_1)(lh.superiorparietal\_3)  
2365 0.91546 (Left-Putamen)(lh.insula\_6)(lh.parsopercularis\_1)(lh.parstriangularis\_3)  
2366 0.91546 (Left-Putamen)(lh.lateralorbitofrontal\_7)(lh.medialorbitofrontal\_2)(lh.rostralmiddlefrontal\_9)  
2367 0.91546 (lh.caudalanteriocingulate\_2)(lh.superiorfrontal\_4)(lh.superiorfrontal\_8)  
2368 0.91546 (lh.lateraloccipital\_1)(lh.pericalcarine\_1)(lh.pericalcarine\_2)  
2369 0.91546 (lh.lateraloccipital\_11)(lh.lateraloccipital\_3)  
2370 0.91546 (lh.lateraloccipital\_6)(lh.lingual\_4)  
2371 0.91546 (lh.lateralorbitofrontal\_4)(lh.lateralorbitofrontal\_7)(lh.rostralmiddlefrontal\_12)  
2372 0.91546 (lh.lateralorbitofrontal\_7)(lh.parstriangularis\_3)(lh.rostralmiddlefrontal\_12)(lh.rostralmiddlefrontal\_9)  
2373 0.91546 (lh.medialorbitofrontal\_1)(lh.medialorbitofrontal\_3)  
2374 0.91546 (lh.parstriangularis\_3)(lh.rostralmiddlefrontal\_12)(lh.rostralmiddlefrontal\_6)(lh.rostralmiddlefrontal\_9)  
2375 0.91546 (lh.precuneus\_6)(lh.superiorparietal\_7)  
2376 0.91546 (lh.rostralanteriocingulate\_1)(lh.rostralmiddlefrontal\_4)  
2377 0.91546 (lh.rostralanteriocingulate\_2)(lh.rostralmiddlefrontal\_8)(lh.superiorfrontal\_4)  
2378 0.91546 (lh.rostralanteriocingulate\_2)(lh.superiorfrontal\_10)  
2379 0.91546 (lh.superiorfrontal\_2)(lh.superiorfrontal\_3)(lh.superiorfrontal\_5)  
2380 0.91546 (lh.superiorfrontal\_3)(lh.superiorfrontal\_6)  
2381 0.91546 (lh.superiorfrontal\_5)(lh.superiorfrontal\_6)(lh.superiorfrontal\_7)  
2382 0.91546 (lh.superiorfrontal\_6)(lh.superiorfrontal\_7)(lh.superiorfrontal\_8)  
2383 0.91546 (rh.caudalmiddlefrontal\_1)(rh.precentral\_10)  
2384 0.91546 (rh.fusiform\_7)(rh.middletemporal\_4)  
2385 0.91546 (rh.inferiorparietal\_4)(rh.supramarginal\_4)  
2386 0.91546 (rh.inferiortemporal\_6)(rh.inferiortemporal\_7)(rh.middletemporal\_1)  
2387 0.91546 (rh.insula\_1)(rh.superiorparietal\_1)(rh.supramarginal\_1)(rh.supramarginal\_9)  
2388 0.91546 (rh.insula\_5)(rh.middletemporal\_9)  
2389 0.91546 (rh.isthmuscingulate\_2)(rh.lingual\_7)  
2390 0.91546 (rh.isthmuscingulate\_2)(rh.precuneus\_2)(rh.precuneus\_4)  
2391 0.91546 (rh.lateraloccipital\_10)(rh.lingual\_7)  
2392 0.91546 (rh.lateraloccipital\_3)(rh.lateraloccipital\_4)(rh.pericalcarine\_4)  
2393 0.91546 (rh.lateraloccipital\_3)(rh.pericalcarine\_1)  
2394 0.91546 (rh.lateraloccipital\_4)(rh.lateraloccipital\_8)(rh.lingual\_2)  
2395 0.91546 (rh.lateralorbitofrontal\_6)(rh.medialorbitofrontal\_2)  
2396 0.91546 (rh.lingual\_4)(rh.pericalcarine\_3)  
2397 0.91546 (rh.parsopercularis\_1)(rh.parsopercularis\_2)  
2398 0.91546 (rh.postcentral\_2)(rh.postcentral\_3)  
2399 0.91546 (rh.precuneus\_4)(rh.superiorparietal\_1)(rh.superiorparietal\_7)  
2400 0.91546 (rh.rostralmiddlefrontal\_5)(rh.superiorfrontal\_2)



2401 0.91546 (rh.superiorfrontal\_1)(rh.superiorfrontal\_4)  
2402 0.91546 (rh.superiorfrontal\_5)(rh.superiorfrontal\_6)(rh.superiorfrontal\_8)(rh.superiorfrontal\_9)  
2403 0.91546 (rh.superiorfrontal\_6)(rh.superiorfrontal\_7)(rh.superiorfrontal\_8)(rh.superiorfrontal\_9)  
2404 0.91546 (rh.supramarginal\_3)(rh.supramarginal\_8)  
2405 0.91546 (Right-Accumbens-area)(Right-Amygdala)(Right-Thalamus-Proper)  
2406 0.91546 (Right-Accumbens-area)(Right-Amygdala)  
2407 0.91546 (Right-Accumbens-area)(Right-Hippocampus)(Right-Pallidum)(Right-Thalamus-Proper)  
2408 0.91546 (Right-Accumbens-area)(Right-Hippocampus)(Right-Pallidum)  
2409 0.91546 (Right-Accumbens-area)(Right-Hippocampus)(Right-Thalamus-Proper)  
2410 0.91546 (Right-Accumbens-area)(Right-Hippocampus)  
2411 0.91546 (Right-Caudate)(lh.caudalanteriorcingulate\_2)  
2412 0.91546 (Right-Caudate)(rh.insula\_1)(rh.precentral\_11)  
2413 0.91546 (Right-Caudate)(rh.insula\_7)(rh.parsopercularis\_4)  
2414 0.91546 (Right-Caudate)(rh.rostralmiddlefrontal\_3)  
2415 0.91546 (Right-Caudate)(Right-Putamen)(Right-Thalamus-Proper)(rh.supramarginal\_9)  
2416 0.91546 (Right-Hippocampus)(rh.bankssts\_2)(rh.insula\_2)  
2417 0.91546 (Right-Hippocampus)(rh.inferiorparietal\_10)(rh.inferiorparietal\_4)  
2418 0.91546 (Right-Putamen)(rh.caudalmiddlefrontal\_4)(rh.rostralmiddlefrontal\_3)  
2419 0.91546 (Right-Putamen)(rh.lateralorbitofrontal\_1)(rh.lateralorbitofrontal\_4)  
2420 0.91546 (Right-Putamen)(rh.lateralorbitofrontal\_2)(rh.lateralorbitofrontal\_6)(rh.lateralorbitofrontal\_7)(rh.rostralmiddlefrontal\_12)  
2421 0.91546 (Right-Putamen)(rh.lateralorbitofrontal\_6)(rh.lateralorbitofrontal\_7)(rh.parstriangularis\_1)  
2422 0.91546 (Right-Putamen)(rh.precentral\_8)  
2423 0.91304 (Left-Amygdala)(lh.fusiform\_8)  
2424 0.91304 (Left-Caudate)(Left-Pallidum)(Left-Putamen)(lh.precentral\_4)  
2425 0.91304 (Left-Caudate)(Left-Putamen)(lh.caudalanteriorcingulate\_2)(lh.rostralanteriorcingulate\_1)(lh.rostralanteriorcingulate\_2)  
2426 0.91304 (Left-Caudate)(Left-Putamen)(lh.insula\_1)(lh.postcentral\_8)  
2427 0.91304 (Left-Caudate)(lh.caudalanteriorcingulate\_2)(lh.superiorfrontal\_10)  
2428 0.91304 (Left-Caudate)(lh.caudalanteriorcingulate\_2)(lh.superiorfrontal\_11)(lh.superiorfrontal\_12)(lh.superiorfrontal\_14)  
2429 0.91304 (Left-Caudate)(lh.caudalanteriorcingulate\_2)(lh.superiorfrontal\_12)(lh.superiorfrontal\_8)  
2430 0.91304 (Left-Caudate)(lh.insula\_6)(lh.parstriangularis\_3)(lh.rostralmiddlefrontal\_1)  
2431 0.91304 (Left-Caudate)(lh.lateralorbitofrontal\_2)(lh.lateralorbitofrontal\_7)  
2432 0.91304 (Left-Caudate)(lh.rostralanteriorcingulate\_1)(lh.rostralmiddlefrontal\_12)(lh.rostralmiddlefrontal\_9)  
2433 0.91304 (Left-Caudate)(lh.rostralanteriorcingulate\_2)(lh.rostralmiddlefrontal\_9)  
2434 0.91304 (Left-Caudate)(lh.superiorfrontal\_10)(lh.superiorfrontal\_11)(lh.superiorfrontal\_8)  
2435 0.91304 (Left-Hippocampus)(Left-Thalamus-Proper)(lh.isthmuscingulate\_2)(lh.isthmuscingulate\_3)  
2436 0.91304 (Left-Hippocampus)(lh.fusiform\_6)  
2437 0.91304 (Left-Hippocampus)(lh.superiortemporal\_6)(lh.superiortemporal\_8)  
2438 0.91304 (Left-Putamen)(lh.insula\_3)(lh.precentral\_11)  
2439 0.91304 (Left-Putamen)(lh.insula\_6)(lh.parsopercularis\_3)(lh.parstriangularis\_3)  
2440 0.91304 (Left-Putamen)(lh.lateralorbitofrontal\_4)(lh.lateralorbitofrontal\_6)(lh.parstriangularis\_3)(lh.rostralmiddlefrontal\_9)  
2441 0.91304 (Left-Putamen)(lh.lateralorbitofrontal\_4)(lh.lateralorbitofrontal\_7)(lh.rostralmiddlefrontal\_12)  
2442 0.91304 (Left-Putamen)(lh.lateralorbitofrontal\_6)(lh.lateralorbitofrontal\_7)(lh.rostralmiddlefrontal\_9)  
2443 0.91304 (Left-Putamen)(lh.postcentral\_8)(lh.precentral\_11)  
2444 0.91304 (Left-Putamen)(lh.superiorfrontal\_3)  
2445 0.91304 (Left-Thalamus-Proper)(lh.insula\_1)(lh.supramarginal\_1)  
2446 0.91304 (Left-Thalamus-Proper)(lh.isthmuscingulate\_1)  
2447 0.91304 (Left-Thalamus-Proper)(lh.supramarginal\_1)  
2448 0.91304 (lh.caudalanteriorcingulate\_2)(lh.caudalmiddlefrontal\_1)  
2449 0.91304 (lh.fusiform\_2)(lh.lateraloccipital\_11)(lh.lateraloccipital\_6)(lh.lingual\_1)  
2450 0.91304 (lh.fusiform\_5)(lh.inferiortemporal\_8)(lh.lateraloccipital\_9)

2451 0.91304 (lh.fusiform\_7)(lh.inferiortemporal\_1)  
2452 0.91304 (lh.inferiortemporal\_3)(lh.inferiortemporal\_4)  
2453 0.91304 (lh.insula\_1)(lh.supramarginal\_1)(lh.supramarginal\_9)  
2454 0.91304 (lh.insula\_3)(lh.precentral\_11)  
2455 0.91304 (lh.insula\_6)(lh.rostralmiddlefrontal\_1)(lh.rostralmiddlefrontal\_4)  
2456 0.91304 (lh.lateralorbitofrontal\_4)(lh.parstriangularis\_3)(lh.rostralmiddlefrontal\_12)(lh.rostralmiddlefrontal\_9)  
2457 0.91304 (lh.lateralorbitofrontal\_6)(lh.parsorbitalis\_1)(lh.parstriangularis\_1)  
2458 0.91304 (lh.lateralorbitofrontal\_7)(lh.rostralanteriorcingulate\_1)(lh.rostralmiddlefrontal\_12)  
2459 0.91304 (lh.lingual\_3)(lh.lingual\_4)(lh.pericalcarine\_3)  
2460 0.91304 (lh.medialorbitofrontal\_2)(lh.rostralanteriorcingulate\_1)(lh.rostralmiddlefrontal\_12)(lh.superiorfrontal\_3)  
2461 0.91304 (lh.medialorbitofrontal\_2)(lh.rostralmiddlefrontal\_12)(lh.superiorfrontal\_1)  
2462 0.91304 (lh.paracentral\_4)(lh.paracentral\_5)(lh.superiorfrontal\_15)  
2463 0.91304 (lh.parsopercularis\_1)(lh.parsopercularis\_3)(lh.parstriangularis\_3)(lh.rostralmiddlefrontal\_1)  
2464 0.91304 (lh.parsopercularis\_2)(lh.parstriangularis\_3)(lh.rostralmiddlefrontal\_1)  
2465 0.91304 (lh.postcentral\_14)(lh.supramarginal\_2)(lh.supramarginal\_4)  
2466 0.91304 (lh.precuneus\_3)(lh.superiorparietal\_7)  
2467 0.91304 (lh.precuneus\_9)(lh.superiorparietal\_6)  
2468 0.91304 (lh.rostralanteriorcingulate\_1)(lh.rostralanteriorcingulate\_2)(lh.rostralmiddlefrontal\_9)  
2469 0.91304 (lh.rostralanteriorcingulate\_1)(lh.rostralmiddlefrontal\_12)(lh.rostralmiddlefrontal\_9)(lh.superiorfrontal\_3)  
2470 0.91304 (lh.rostralanteriorcingulate\_2)(lh.superiorfrontal\_4)(lh.superiorfrontal\_8)  
2471 0.91304 (lh.rostralmiddlefrontal\_5)(lh.rostralmiddlefrontal\_7)  
2472 0.91304 (lh.superiorfrontal\_10)(lh.superiorfrontal\_4)(lh.superiorfrontal\_5)  
2473 0.91304 (lh.superiorfrontal\_10)(lh.superiorfrontal\_5)  
2474 0.91304 (lh.superiorfrontal\_3)(lh.superiorfrontal\_4)(lh.superiorfrontal\_6)  
2475 0.91304 (lh.superiorfrontal\_4)(lh.superiorfrontal\_5)(lh.superiorfrontal\_6)(lh.superiorfrontal\_7)  
2476 0.91304 (lh.superiorfrontal\_4)(lh.superiorfrontal\_6)(lh.superiorfrontal\_7)(lh.superiorfrontal\_8)  
2477 0.91304 (lh.supramarginal\_1)(lh.supramarginal\_6)(lh.supramarginal\_9)  
2478 0.91304 (rh.bankssts\_3)(rh.inferiorparietal\_4)  
2479 0.91304 (rh.caudalmiddlefrontal\_4)(rh.rostralmiddlefrontal\_2)(rh.rostralmiddlefrontal\_3)  
2480 0.91304 (rh.fusiform\_1)(rh.inferiorparietal\_10)(rh.lateraloccipital\_8)  
2481 0.91304 (rh.fusiform\_1)(rh.lateraloccipital\_10)(rh.lateraloccipital\_7)  
2482 0.91304 (rh.inferiorparietal\_12)(rh.pericalcarine\_1)  
2483 0.91304 (rh.inferiorparietal\_5)(rh.inferiorparietal\_8)  
2484 0.91304 (rh.insula\_4)(rh.insula\_5)(rh.insula\_6)  
2485 0.91304 (rh.lateralorbitofrontal\_7)(rh.rostralmiddlefrontal\_11)(rh.superiorfrontal\_2)  
2486 0.91304 (rh.precuneus\_5)(rh.precuneus\_7)  
2487 0.91304 (rh.rostralmiddlefrontal\_12)(rh.rostralmiddlefrontal\_3)(rh.rostralmiddlefrontal\_8)  
2488 0.91304 (rh.rostralmiddlefrontal\_5)(rh.rostralmiddlefrontal\_9)  
2489 0.91304 (rh.superiorfrontal\_5)(rh.superiorfrontal\_6)(rh.superiorfrontal\_7)(rh.superiorfrontal\_9)  
2490 0.91304 (Right-Accumbens-area)(Right-Amygdala)(Right-Pallidum)(Right-Thalamus-Proper)  
2491 0.91304 (Right-Accumbens-area)(Right-Amygdala)(Right-Pallidum)  
2492 0.91304 (Right-Caudate)(rh.posteriorcingulate\_2)(rh.superiorfrontal\_11)  
2493 0.91304 (Right-Caudate)(Right-Putamen)(rh.caudalanteriorcingulate\_1)  
2494 0.91304 (Right-Caudate)(Right-Putamen)(rh.insula\_7)(rh.parsopercularis\_4)  
2495 0.91304 (Right-Caudate)(Right-Putamen)(rh.lateralorbitofrontal\_5)  
2496 0.91304 (Right-Hippocampus)(rh.bankssts\_2)(rh.inferiorparietal\_10)  
2497 0.91304 (Right-Hippocampus)(rh.isthmuscingulate\_2)(rh.lingual\_7)  
2498 0.91304 (Right-Hippocampus)(rh.precuneus\_4)  
2499 0.91304 (Right-Putamen)(rh.caudalanteriorcingulate\_1)  
2500 0.91304 (Right-Putamen)(rh.insula\_4)(rh.insula\_5)(rh.insula\_6)

2501 0.91304 (Right-Putamen)(rh.lateralorbitofrontal\_6)(rh.medialorbitofrontal\_2)  
2502 0.91304 (Right-Putamen)(rh.lateralorbitofrontal\_6)(rh.rostralmiddlefrontal\_13)  
2503 0.91304 (Right-Putamen)(rh.medialorbitofrontal\_2)(rh.superiorfrontal\_2)  
2504 0.91304 (Right-Putamen)(rh.rostralmiddlefrontal\_12)(rh.rostralmiddlefrontal\_8)(rh.superiorfrontal\_2)  
2505 0.91304 (Right-Putamen)(Right-Thalamus-Proper)(rh.precentral\_11)  
2506 0.91063 (Left-Accumbens-area)(Right-Caudate)  
2507 0.91063 (Left-Amygdala)(Left-Hippocampus)(Left-Putamen)(lh.insula\_4)  
2508 0.91063 (Left-Caudate)(Left-Putamen)(lh.lateralorbitofrontal\_7)(lh.rostralmiddlefrontal\_9)  
2509 0.91063 (Left-Caudate)(Left-Putamen)(lh.medialorbitofrontal\_2)(lh.rostralmiddlefrontal\_12)  
2510 0.91063 (Left-Caudate)(Left-Putamen)(lh.precentral\_11)(lh.precentral\_14)  
2511 0.91063 (Left-Caudate)(Left-Putamen)(lh.superiorfrontal\_11)(lh.superiorfrontal\_12)  
2512 0.91063 (Left-Caudate)(Left-Putamen)(lh.superiorfrontal\_11)(lh.superiorfrontal\_4)  
2513 0.91063 (Left-Caudate)(Left-Thalamus-Proper)(lh.precentral\_9)  
2514 0.91063 (Left-Caudate)(lh.insula\_6)(lh.rostralmiddlefrontal\_4)  
2515 0.91063 (Left-Caudate)(lh.medialorbitofrontal\_2)(lh.rostralmiddlefrontal\_12)(lh.rostralmiddlefrontal\_9)  
2516 0.91063 (Left-Caudate)(lh.parstriangularis\_3)(lh.rostralmiddlefrontal\_4)(lh.rostralmiddlefrontal\_9)  
2517 0.91063 (Left-Caudate)(lh.rostralanterioringulate\_1)(lh.rostralmiddlefrontal\_4)  
2518 0.91063 (Left-Hippocampus)(Left-Putamen)(lh.insula\_4)  
2519 0.91063 (Left-Hippocampus)(lh.isthmuscingulate\_3)(lh.lingual\_6)(lh.precuneus\_11)  
2520 0.91063 (Left-Putamen)(lh.lateralorbitofrontal\_4)(lh.lateralorbitofrontal\_6)(lh.rostralmiddlefrontal\_12)(lh.rostralmiddlefrontal\_9)  
2521 0.91063 (Left-Putamen)(lh.lateralorbitofrontal\_4)(lh.lateralorbitofrontal\_7)(lh.parstriangularis\_3)  
2522 0.91063 (Left-Putamen)(lh.lateralorbitofrontal\_6)(lh.rostralmiddlefrontal\_1)  
2523 0.91063 (Left-Putamen)(lh.medialorbitofrontal\_2)(lh.rostralanterioringulate\_1)(lh.rostralmiddlefrontal\_12)(lh.rostralmiddlefrontal\_9)  
2524 0.91063 (Left-Thalamus-Proper)(lh.postcentral\_3)  
2525 0.91063 (lh.bankssts\_2)(lh.fusiform\_7)  
2526 0.91063 (lh.caudalanterioringulate\_2)(lh.rostralanterioringulate\_2)(lh.superiorfrontal\_8)  
2527 0.91063 (lh.caudalanterioringulate\_2)(lh.superiorfrontal\_11)(lh.superiorfrontal\_4)  
2528 0.91063 (lh.cuneus\_1)(lh.precuneus\_9)  
2529 0.91063 (lh.fusiform\_2)(lh.lingual\_6)  
2530 0.91063 (lh.fusiform\_4)(lh.fusiform\_7)  
2531 0.91063 (lh.inferiorparietal\_7)(lh.inferiorparietal\_9)  
2532 0.91063 (lh.inferiortemporal\_5)(lh.inferiortemporal\_6)  
2533 0.91063 (lh.inferiortemporal\_8)(lh.middletemporal\_1)  
2534 0.91063 (lh.insula\_1)(lh.precentral\_11)(lh.precentral\_7)  
2535 0.91063 (lh.insula\_6)(lh.rostralmiddlefrontal\_9)  
2536 0.91063 (lh.isthmuscingulate\_3)(lh.precuneus\_11)(lh.precuneus\_6)  
2537 0.91063 (lh.lateraloccipital\_10)(lh.lateraloccipital\_11)  
2538 0.91063 (lh.lateraloccipital\_2)(lh.pericalcarine\_1)(lh.pericalcarine\_2)  
2539 0.91063 (lh.lateralorbitofrontal\_6)(lh.lateralorbitofrontal\_7)(lh.rostralmiddlefrontal\_12)(lh.rostralmiddlefrontal\_9)  
2540 0.91063 (lh.lateralorbitofrontal\_6)(lh.parstriangularis\_3)(lh.rostralmiddlefrontal\_12)(lh.rostralmiddlefrontal\_6)  
2541 0.91063 (lh.lingual\_1)(lh.lingual\_3)(lh.lingual\_4)  
2542 0.91063 (lh.medialorbitofrontal\_1)(lh.rostralmiddlefrontal\_12)  
2543 0.91063 (lh.medialorbitofrontal\_2)(lh.medialorbitofrontal\_4)  
2544 0.91063 (lh.medialorbitofrontal\_2)(lh.rostralmiddlefrontal\_9)(lh.superiorfrontal\_1)  
2545 0.91063 (lh.precuneus\_11)(lh.precuneus\_9)(lh.superiorparietal\_11)  
2546 0.91063 (lh.rostralanterioringulate\_2)(lh.superiorfrontal\_11)  
2547 0.91063 (lh.rostralmiddlefrontal\_4)(lh.superiorfrontal\_3)  
2548 0.91063 (lh.rostralmiddlefrontal\_8)(lh.superiorfrontal\_2)  
2549 0.91063 (lh.superiorfrontal\_1)(lh.superiorfrontal\_4)  
2550 0.91063 (lh.superiorfrontal\_11)(lh.superiorfrontal\_13)(lh.superiorfrontal\_14)

2551 0.91063 (rh.caudalmiddlefrontal\_4)(rh.insula\_3)(rh.precentral\_7)  
2552 0.91063 (rh.caudalmiddlefrontal\_4)(rh.rostralmiddlefrontal\_5)  
2553 0.91063 (rh.caudalmiddlefrontal\_4)(rh.superiorfrontal\_13)(rh.superiorfrontal\_9)  
2554 0.91063 (rh.caudalmiddlefrontal\_4)(rh.superiorfrontal\_7)(rh.superiorfrontal\_9)  
2555 0.91063 (rh.fusiform\_1)(rh.lateraloccipital\_4)(rh.lingual\_2)  
2556 0.91063 (rh.fusiform\_2)(rh.inferiorparietal\_10)(rh.lateraloccipital\_10)  
2557 0.91063 (rh.fusiform\_5)(rh.inferiorparietal\_10)  
2558 0.91063 (rh.inferiorparietal\_10)(rh.middletemporal\_1)  
2559 0.91063 (rh.inferiorparietal\_11)(rh.lateraloccipital\_10)  
2560 0.91063 (rh.inferiorparietal\_12)(rh.inferiorparietal\_7)  
2561 0.91063 (rh.lateraloccipital\_4)(rh.lateraloccipital\_7)(rh.pericalcarine\_3)  
2562 0.91063 (rh.lateraloccipital\_4)(rh.lingual\_2)(rh.pericalcarine\_3)  
2563 0.91063 (rh.lateraloccipital\_5)(rh.lateraloccipital\_8)  
2564 0.91063 (rh.lateralorbitofrontal\_4)(rh.lateralorbitofrontal\_5)(rh.lateralorbitofrontal\_7)  
2565 0.91063 (rh.lateralorbitofrontal\_6)(rh.lateralorbitofrontal\_7)(rh.medialorbitofrontal\_2)  
2566 0.91063 (rh.lateralorbitofrontal\_6)(rh.lateralorbitofrontal\_7)(rh.parstriangularis\_1)(rh.rostralmiddlefrontal\_12)  
2567 0.91063 (rh.precuneus\_10)(rh.superiorparietal\_2)  
2568 0.91063 (rh.precuneus\_10)(rh.superiorparietal\_4)  
2569 0.91063 (rh.precuneus\_5)(rh.superiorparietal\_9)  
2570 0.91063 (rh.rostralmiddlefrontal\_11)(rh.rostralmiddlefrontal\_8)(rh.superiorfrontal\_2)  
2571 0.91063 (rh.rostralmiddlefrontal\_2)(rh.rostralmiddlefrontal\_4)  
2572 0.91063 (rh.rostralmiddlefrontal\_3)(rh.rostralmiddlefrontal\_4)(rh.rostralmiddlefrontal\_5)  
2573 0.91063 (rh.superiorfrontal\_2)(rh.superiorfrontal\_8)  
2574 0.91063 (Right-Caudate)(Right-Putamen)(rh.insula\_1)(rh.precentral\_11)  
2575 0.91063 (Right-Caudate)(Right-Putamen)(rh.superiorfrontal\_7)  
2576 0.91063 (Right-Caudate)(Right-Thalamus-Proper)(rh.posteriorcingulate\_2)  
2577 0.91063 (Right-Hippocampus)(rh.inferiortemporal\_1)  
2578 0.91063 (Right-Putamen)(rh.caudalmiddlefrontal\_4)(rh.insula\_3)(rh.precentral\_7)  
2579 0.91063 (Right-Putamen)(rh.caudalmiddlefrontal\_4)(rh.superiorfrontal\_13)  
2580 0.91063 (Right-Putamen)(rh.caudalmiddlefrontal\_4)(rh.superiorfrontal\_7)  
2581 0.91063 (Right-Putamen)(rh.lateralorbitofrontal\_5)(rh.lateralorbitofrontal\_7)(rh.medialorbitofrontal\_2)  
2582 0.91063 (Right-Putamen)(rh.lateralorbitofrontal\_7)(rh.rostralmiddlefrontal\_13)  
2583 0.91063 (Right-Putamen)(rh.parsopercularis\_4)(rh.parstriangularis\_1)  
2584 0.91063 (Right-Putamen)(rh.postcentral\_4)  
2585 0.91063 (Right-Putamen)(rh.postcentral\_5)  
2586 0.91063 (Right-Putamen)(rh.rostralmiddlefrontal\_3)(rh.rostralmiddlefrontal\_5)  
2587 0.91063 (Right-Thalamus-Proper)(rh.posteriorcingulate\_2)  
2588 0.90821 (Left-Accumbens-area)(Left-Caudate)(Left-Putamen)(lh.rostralanteriorcingulate\_1)  
2589 0.90821 (Left-Accumbens-area)(Left-Putamen)(lh.medialorbitofrontal\_5)  
2590 0.90821 (Left-Caudate)(Left-Hippocampus)(Left-Putamen)(Left-Thalamus-Proper)(lh.insula\_1)  
2591 0.90821 (Left-Caudate)(Left-Hippocampus)(Left-Putamen)(lh.insula\_1)  
2592 0.90821 (Left-Caudate)(Left-Hippocampus)(Left-Thalamus-Proper)(lh.insula\_1)  
2593 0.90821 (Left-Caudate)(Left-Hippocampus)(lh.insula\_1)  
2594 0.90821 (Left-Caudate)(Left-Putamen)(Left-Thalamus-Proper)(lh.precentral\_9)  
2595 0.90821 (Left-Caudate)(Left-Putamen)(lh.caudalmiddlefrontal\_1)(lh.caudalmiddlefrontal\_4)  
2596 0.90821 (Left-Caudate)(Left-Putamen)(lh.caudalmiddlefrontal\_3)(lh.insula\_6)(lh.rostralmiddlefrontal\_1)  
2597 0.90821 (Left-Caudate)(Left-Putamen)(lh.insula\_6)(lh.rostralmiddlefrontal\_4)  
2598 0.90821 (Left-Caudate)(Left-Putamen)(lh.lateralorbitofrontal\_2)(lh.lateralorbitofrontal\_7)  
2599 0.90821 (Left-Caudate)(Left-Putamen)(lh.lateralorbitofrontal\_6)  
2600 0.90821 (Left-Caudate)(Left-Putamen)(lh.lateralorbitofrontal\_7)(lh.rostralanteriorcingulate\_1)

2601 0.90821 (Left-Caudate)(Left-Putamen)(lh.lateralorbitofrontal\_7)(lh.rostralmiddlefrontal\_12)  
2602 0.90821 (Left-Caudate)(Left-Putamen)(lh.parstriangularis\_3)(lh.rostralmiddlefrontal\_4)  
2603 0.90821 (Left-Caudate)(Left-Putamen)(lh.rostralanteriorcingulate\_1)(lh.rostralmiddlefrontal\_12)(lh.rostralmiddlefrontal\_9)  
2604 0.90821 (Left-Caudate)(lh.caudalanteriorcingulate\_2)(lh.caudalmiddlefrontal\_1)  
2605 0.90821 (Left-Caudate)(lh.caudalanteriorcingulate\_2)(lh.posteriorcingulate\_3)(lh.superiorfrontal\_14)  
2606 0.90821 (Left-Caudate)(lh.caudalmiddlefrontal\_6)(lh.precentral\_11)(lh.precentral\_9)  
2607 0.90821 (Left-Caudate)(lh.insula\_1)(lh.supramarginal\_1)  
2608 0.90821 (Left-Caudate)(lh.medialorbitofrontal\_2)(lh.medialorbitofrontal\_4)  
2609 0.90821 (Left-Caudate)(lh.medialorbitofrontal\_2)(lh.rostralanteriorcingulate\_1)(lh.rostralmiddlefrontal\_12)  
2610 0.90821 (Left-Caudate)(lh.postcentral\_8)(lh.precentral\_4)  
2611 0.90821 (Left-Caudate)(lh.superiorfrontal\_11)(lh.superiorfrontal\_14)(lh.superiorfrontal\_8)  
2612 0.90821 (Left-Hippocampus)(lh.superiortemporal\_11)  
2613 0.90821 (Left-Hippocampus)(lh.superiortemporal\_3)(lh.superiortemporal\_6)  
2614 0.90821 (Left-Pallidum)(Left-Thalamus-Proper)(lh.precentral\_4)  
2615 0.90821 (Left-Putamen)(lh.caudalanteriorcingulate\_2)(lh.superiorfrontal\_14)  
2616 0.90821 (Left-Putamen)(lh.caudalmiddlefrontal\_1)(lh.caudalmiddlefrontal\_3)(lh.caudalmiddlefrontal\_4)  
2617 0.90821 (Left-Putamen)(lh.caudalmiddlefrontal\_1)(lh.rostralmiddlefrontal\_4)  
2618 0.90821 (Left-Putamen)(lh.caudalmiddlefrontal\_3)(lh.rostralmiddlefrontal\_1)(lh.rostralmiddlefrontal\_4)  
2619 0.90821 (Left-Putamen)(lh.insula\_1)(lh.precentral\_11)(lh.precentral\_7)  
2620 0.90821 (Left-Putamen)(lh.lateralorbitofrontal\_7)(lh.parstriangularis\_3)(lh.rostralmiddlefrontal\_9)  
2621 0.90821 (Left-Putamen)(lh.parstriangularis\_3)(lh.rostralmiddlefrontal\_1)(lh.rostralmiddlefrontal\_4)(lh.rostralmiddlefrontal\_9)  
2622 0.90821 (Left-Putamen)(lh.precentral\_16)  
2623 0.90821 (lh.caudalmiddlefrontal\_4)(lh.precentral\_9)  
2624 0.90821 (lh.cuneus\_3)(lh.lateraloccipital\_1)  
2625 0.90821 (lh.fusiform\_1)(lh.fusiform\_4)  
2626 0.90821 (lh.fusiform\_3)(lh.lateraloccipital\_9)  
2627 0.90821 (lh.fusiform\_5)(lh.inferiorparietal\_4)  
2628 0.90821 (lh.inferiorparietal\_2)(lh.inferiorparietal\_3)  
2629 0.90821 (lh.insula\_2)(lh.postcentral\_14)  
2630 0.90821 (lh.lateraloccipital\_3)(lh.pericalcarine\_1)(lh.pericalcarine\_2)  
2631 0.90821 (lh.lateralorbitofrontal\_6)(lh.rostralmiddlefrontal\_1)(lh.rostralmiddlefrontal\_6)  
2632 0.90821 (lh.lingual\_1)(lh.lingual\_2)  
2633 0.90821 (lh.medialorbitofrontal\_2)(lh.rostralanteriorcingulate\_1)(lh.superiorfrontal\_4)  
2634 0.90821 (lh.medialorbitofrontal\_2)(lh.rostralmiddlefrontal\_12)(lh.superiorfrontal\_1)(lh.superiorfrontal\_3)  
2635 0.90821 (lh.parahippocampal\_1)(lh.parahippocampal\_2)  
2636 0.90821 (lh.parsorbitalis\_1)(lh.rostralmiddlefrontal\_6)  
2637 0.90821 (lh.parstriangularis\_2)(lh.rostralmiddlefrontal\_1)  
2638 0.90821 (lh.precentral\_7)(lh.precentral\_9)  
2639 0.90821 (lh.rostralmiddlefrontal\_8)(lh.rostralmiddlefrontal\_9)(lh.superiorfrontal\_4)  
2640 0.90821 (lh.superiorfrontal\_1)(lh.superiorfrontal\_3)(lh.superiorfrontal\_4)  
2641 0.90821 (lh.superiorfrontal\_10)(lh.superiorfrontal\_11)(lh.superiorfrontal\_9)  
2642 0.90821 (lh.superiorfrontal\_11)(lh.superiorfrontal\_13)(lh.superiorfrontal\_9)  
2643 0.90821 (lh.superiorfrontal\_4)(lh.superiorfrontal\_7)(lh.superiorfrontal\_9)  
2644 0.90821 (lh.superiorfrontal\_4)(lh.superiorfrontal\_9)  
2645 0.90821 (lh.superiorparietal\_2)(lh.superiorparietal\_3)  
2646 0.90821 (lh.superiorparietal\_5)(lh.supramarginal\_1)  
2647 0.90821 (lh.superiortemporal\_3)(lh.superiortemporal\_6)(lh.superiortemporal\_8)  
2648 0.90821 (rh.bankssts\_1)(rh.inferiortemporal\_4)  
2649 0.90821 (rh.bankssts\_1)(rh.inferiortemporal\_7)  
2650 0.90821 (rh.caudalmiddlefrontal\_3)(rh.caudalmiddlefrontal\_4)(rh.caudalmiddlefrontal\_5)

2651 0.90821 (rh.fusiform\_1)(rh.inferiorparietal\_10)(rh.lateraloccipital\_10)  
2652 0.90821 (rh.fusiform\_8)(rh.superiortemporal\_10)  
2653 0.90821 (rh.inferiorparietal\_12)(rh.lingual\_7)  
2654 0.90821 (rh.inferiorparietal\_12)(rh.precuneus\_2)(rh.superiorparietal\_11)  
2655 0.90821 (rh.insula\_1)(rh.precentral\_11)(rh.precentral\_7)  
2656 0.90821 (rh.insula\_1)(rh.supramarginal\_1)(rh.supramarginal\_8)(rh.supramarginal\_9)  
2657 0.90821 (rh.lateraloccipital\_10)(rh.lateraloccipital\_7)(rh.lateraloccipital\_8)  
2658 0.90821 (rh.lateralorbitofrontal\_6)(rh.parsorbitalis\_1)  
2659 0.90821 (rh.lateralorbitofrontal\_7)(rh.rostralmiddlefrontal\_12)(rh.superiorfrontal\_2)  
2660 0.90821 (rh.parsopercularis\_2)(rh.parsopercularis\_4)(rh.parstriangularis\_2)  
2661 0.90821 (rh.parstriangularis\_1)(rh.parstriangularis\_4)(rh.rostralmiddlefrontal\_12)(rh.rostralmiddlefrontal\_8)  
2662 0.90821 (rh.parstriangularis\_1)(rh.rostralmiddlefrontal\_12)(rh.rostralmiddlefrontal\_3)  
2663 0.90821 (rh.parstriangularis\_4)(rh.rostralmiddlefrontal\_3)(rh.rostralmiddlefrontal\_8)  
2664 0.90821 (rh.postcentral\_1)(rh.postcentral\_4)(rh.supramarginal\_7)  
2665 0.90821 (rh.precentral\_1)(rh.precentral\_4)(rh.precentral\_6)  
2666 0.90821 (rh.precentral\_15)(rh.precentral\_16)  
2667 0.90821 (rh.precuneus\_1)(rh.superiorparietal\_10)(rh.superiorparietal\_11)  
2668 0.90821 (rh.precuneus\_2)(rh.precuneus\_4)(rh.superiorparietal\_11)  
2669 0.90821 (rh.precuneus\_4)(rh.precuneus\_5)(rh.superiorparietal\_10)  
2670 0.90821 (rh.rostralmiddlefrontal\_1)(rh.rostralmiddlefrontal\_3)(rh.rostralmiddlefrontal\_5)  
2671 0.90821 (rh.rostralmiddlefrontal\_12)(rh.rostralmiddlefrontal\_7)(rh.rostralmiddlefrontal\_8)  
2672 0.90821 (rh.rostralmiddlefrontal\_5)(rh.rostralmiddlefrontal\_8)(rh.superiorfrontal\_2)  
2673 0.90821 (rh.superiorfrontal\_13)(rh.superiorfrontal\_16)  
2674 0.90821 (rh.superiorfrontal\_13)(rh.superiorfrontal\_7)(rh.superiorfrontal\_9)  
2675 0.90821 (rh.superiorfrontal\_2)(rh.superiorfrontal\_3)  
2676 0.90821 (rh.superiorfrontal\_3)(rh.superiorfrontal\_4)(rh.superiorfrontal\_6)  
2677 0.90821 (rh.superiorfrontal\_5)(rh.superiorfrontal\_6)(rh.superiorfrontal\_7)(rh.superiorfrontal\_8)(rh.superiorfrontal\_9)  
2678 0.90821 (Right-Caudate)(Right-Putamen)(rh.rostralmiddlefrontal\_5)  
2679 0.90821 (Right-Hippocampus)(rh.bankssts\_2)(rh.middletemporal\_4)  
2680 0.90821 (Right-Hippocampus)(rh.inferiorparietal\_10)(rh.lingual\_7)  
2681 0.90821 (Right-Hippocampus)(rh.precuneus\_3)(rh.precuneus\_7)  
2682 0.90821 (Right-Putamen)(rh.caudalmiddlefrontal\_1)(rh.caudalmiddlefrontal\_4)  
2683 0.90821 (Right-Putamen)(rh.insula\_1)(rh.postcentral\_1)  
2684 0.90821 (Right-Putamen)(rh.medialorbitofrontal\_2)(rh.rostralmiddlefrontal\_13)  
2685 0.90821 (Right-Putamen)(rh.parstriangularis\_1)(rh.rostralmiddlefrontal\_3)(rh.rostralmiddlefrontal\_8)  
2686 0.90821 (Right-Putamen)(rh.superiorfrontal\_11)  
2687 0.9058 (Left-Accumbens-area)(Left-Caudate)(lh.medialorbitofrontal\_5)  
2688 0.9058 (Left-Caudate)(Left-Pallidum)(Left-Thalamus-Proper)(lh.precentral\_4)  
2689 0.9058 (Left-Caudate)(Left-Putamen)(lh.caudalanteriorcingulate\_2)(lh.posteriorcingulate\_1)(lh.posteriorcingulate\_3)  
2690 0.9058 (Left-Caudate)(Left-Thalamus-Proper)(lh.postcentral\_8)  
2691 0.9058 (Left-Caudate)(lh.caudalmiddlefrontal\_3)(lh.rostralmiddlefrontal\_1)(lh.rostralmiddlefrontal\_4)  
2692 0.9058 (Left-Caudate)(lh.lateralorbitofrontal\_7)(lh.medialorbitofrontal\_2)(lh.rostralmiddlefrontal\_12)  
2693 0.9058 (Left-Hippocampus)(Left-Pallidum)(Left-Putamen)(Left-Thalamus-Proper)(lh.insula\_1)  
2694 0.9058 (Left-Hippocampus)(Left-Pallidum)(Left-Putamen)(lh.insula\_1)  
2695 0.9058 (Left-Hippocampus)(Left-Pallidum)(Left-Thalamus-Proper)(lh.insula\_1)  
2696 0.9058 (Left-Hippocampus)(Left-Pallidum)(lh.insula\_1)  
2697 0.9058 (Left-Pallidum)(Left-Putamen)(Left-Thalamus-Proper)(lh.precentral\_4)  
2698 0.9058 (Left-Putamen)(lh.caudalanteriorcingulate\_2)(lh.caudalmiddlefrontal\_3)(lh.superiorfrontal\_11)  
2699 0.9058 (Left-Putamen)(lh.caudalanteriorcingulate\_2)(lh.posteriorcingulate\_1)(lh.posteriorcingulate\_3)  
2700 0.9058 (Left-Putamen)(lh.caudalmiddlefrontal\_4)(lh.precentral\_9)

2701 0.9058 (Left-Putamen)(lh.lateralorbitofrontal\_4)(lh.parstriangularis\_3)(lh.rostralmiddlefrontal\_12)  
2702 0.9058 (Left-Putamen)(lh.lateralorbitofrontal\_7)(lh.medialorbitofrontal\_2)(lh.rostralmiddlefrontal\_12)(lh.rostralmiddlefrontal\_9)  
2703 0.9058 (Left-Putamen)(lh.lateralorbitofrontal\_7)(lh.medialorbitofrontal\_4)  
2704 0.9058 (Left-Putamen)(lh.lateralorbitofrontal\_7)(lh.rostralanteriorcingulate\_1)(lh.rostralmiddlefrontal\_12)  
2705 0.9058 (Left-Putamen)(lh.rostralanteriorcingulate\_1)(lh.rostralanteriorcingulate\_2)(lh.superiorfrontal\_4)  
2706 0.9058 (Left-Putamen)(lh.rostralanteriorcingulate\_1)(lh.rostralmiddlefrontal\_4)  
2707 0.9058 (Left-Putamen)(lh.rostralanteriorcingulate\_2)(lh.rostralmiddlefrontal\_9)  
2708 0.9058 (Left-Putamen)(lh.rostralmiddlefrontal\_9)(lh.superiorfrontal\_3)  
2709 0.9058 (lh.caudalanteriorcingulate\_2)(lh.caudalmiddlefrontal\_3)(lh.superiorfrontal\_12)  
2710 0.9058 (lh.caudalanteriorcingulate\_2)(lh.superiorfrontal\_11)(lh.superiorfrontal\_4)(lh.superiorfrontal\_8)  
2711 0.9058 (lh.caudalmiddlefrontal\_1)(lh.caudalmiddlefrontal\_3)(lh.caudalmiddlefrontal\_5)  
2712 0.9058 (lh.fusiform\_4)(lh.fusiform\_5)(lh.inferiortemporal\_8)  
2713 0.9058 (lh.fusiform\_7)(lh.inferiortemporal\_3)(lh.inferiortemporal\_6)  
2714 0.9058 (lh.inferiorparietal\_1)(lh.lateraloccipital\_6)(lh.lateraloccipital\_7)  
2715 0.9058 (lh.inferiortemporal\_2)(lh.inferiortemporal\_3)  
2716 0.9058 (lh.insula\_3)(lh.postcentral\_12)  
2717 0.9058 (lh.lateralorbitofrontal\_4)(lh.lateralorbitofrontal\_5)  
2718 0.9058 (lh.lateralorbitofrontal\_4)(lh.lateralorbitofrontal\_6)(lh.lateralorbitofrontal\_7)(lh.rostralmiddlefrontal\_12)  
2719 0.9058 (lh.medialorbitofrontal\_2)(lh.rostralmiddlefrontal\_9)(lh.superiorfrontal\_1)(lh.superiorfrontal\_3)  
2720 0.9058 (lh.paracentral\_5)(lh.postcentral\_4)  
2721 0.9058 (lh.parstriangularis\_2)(lh.parstriangularis\_3)(lh.rostralmiddlefrontal\_1)  
2722 0.9058 (lh.postcentral\_3)(lh.posteriorcingulate\_4)  
2723 0.9058 (lh.precentral\_12)(lh.precentral\_14)(lh.precentral\_16)  
2724 0.9058 (lh.rostralanteriorcingulate\_1)(lh.rostralmiddlefrontal\_4)(lh.rostralmiddlefrontal\_9)  
2725 0.9058 (lh.superiorfrontal\_11)(lh.superiorfrontal\_6)  
2726 0.9058 (lh.superiorfrontal\_14)(lh.superiorfrontal\_7)(lh.superiorfrontal\_8)(lh.superiorfrontal\_9)  
2727 0.9058 (lh.superiorfrontal\_2)(lh.superiorfrontal\_4)(lh.superiorfrontal\_5)  
2728 0.9058 (lh.supramarginal\_10)(lh.supramarginal\_9)  
2729 0.9058 (rh.caudalanteriorcingulate\_3)(rh.caudalmiddlefrontal\_4)  
2730 0.9058 (rh.caudalmiddlefrontal\_2)(rh.caudalmiddlefrontal\_3)(rh.caudalmiddlefrontal\_4)  
2731 0.9058 (rh.caudalmiddlefrontal\_4)(rh.rostralmiddlefrontal\_1)(rh.rostralmiddlefrontal\_2)  
2732 0.9058 (rh.cuneus\_2)(rh.superiorparietal\_11)  
2733 0.9058 (rh.inferiorparietal\_1)(rh.superiorparietal\_11)  
2734 0.9058 (rh.inferiorparietal\_4)(rh.insula\_2)  
2735 0.9058 (rh.inferiortemporal\_3)(rh.middletemporal\_4)  
2736 0.9058 (rh.insula\_2)(rh.insula\_5)  
2737 0.9058 (rh.insula\_6)(rh.insula\_7)  
2738 0.9058 (rh.lateraloccipital\_4)(rh.lateraloccipital\_5)(rh.lateraloccipital\_7)  
2739 0.9058 (rh.lateralorbitofrontal\_7)(rh.medialorbitofrontal\_3)  
2740 0.9058 (rh.lateralorbitofrontal\_7)(rh.rostralmiddlefrontal\_8)  
2741 0.9058 (rh.middletemporal\_9)(rh.superiortemporal\_7)  
2742 0.9058 (rh.paracentral\_3)(rh.precentral\_14)  
2743 0.9058 (rh.parsorbitalis\_2)(rh.rostralmiddlefrontal\_13)  
2744 0.9058 (rh.precentral\_7)(rh.precentral\_8)  
2745 0.9058 (rh.precuneus\_1)(rh.precuneus\_4)(rh.superiorparietal\_10)  
2746 0.9058 (rh.precuneus\_10)(rh.precuneus\_7)(rh.superiorparietal\_7)  
2747 0.9058 (rh.superiorfrontal\_14)(rh.superiorfrontal\_16)(rh.superiorfrontal\_17)  
2748 0.9058 (rh.superiorfrontal\_2)(rh.superiorfrontal\_5)(rh.superiorfrontal\_8)  
2749 0.9058 (rh.superiorfrontal\_4)(rh.superiorfrontal\_7)  
2750 0.9058 (rh.superiorparietal\_1)(rh.supramarginal\_1)(rh.supramarginal\_8)(rh.supramarginal\_9)

2751 0.9058 (Right-Accumbens-area)(Right-Hippocampus)(Right-Pallidum)(Right-Putamen)(Right-Thalamus-Prop  
2752 0.9058 (Right-Accumbens-area)(Right-Hippocampus)(Right-Pallidum)(Right-Putamen)  
2753 0.9058 (Right-Accumbens-area)(Right-Hippocampus)(Right-Putamen)(Right-Thalamus-Prop  
2754 0.9058 (Right-Accumbens-area)(Right-Hippocampus)(Right-Putamen)  
2755 0.9058 (Right-Amygdala)(Right-Hippocampus)(rh.inferiortemporal\_1)  
2756 0.9058 (Right-Caudate)(rh.caudalanteriorcingulate\_3)(rh.caudalmiddlefrontal\_4)  
2757 0.9058 (Right-Caudate)(rh.caudalmiddlefrontal\_4)(rh.precentral\_7)  
2758 0.9058 (Right-Caudate)(rh.medialorbitofrontal\_4)  
2759 0.9058 (Right-Caudate)(rh.superiorfrontal\_9)  
2760 0.9058 (Right-Caudate)(Right-Putamen)(rh.caudalmiddlefrontal\_4)(rh.precentral\_7)  
2761 0.9058 (Right-Caudate)(Right-Thalamus-Prop  
2762 0.9058 (Right-Hippocampus)(rh.fusiform\_5)  
2763 0.9058 (Right-Hippocampus)(rh.inferiorparietal\_4)(rh.supramarginal\_9)  
2764 0.9058 (Right-Putamen)(rh.insula\_2)(rh.insula\_5)  
2765 0.9058 (Right-Putamen)(rh.insula\_6)(rh.insula\_7)  
2766 0.9058 (Right-Putamen)(rh.lateralorbitofrontal\_7)(rh.parstriangularis\_1)(rh.rostralmiddlefrontal\_12)  
2767 0.9058 (Right-Putamen)(rh.precentral\_15)  
2768 0.90338 (Left-Accumbens-area)(Left-Caudate)(Right-Caudate)  
2769 0.90338 (Left-Amygdala)(lh.inferiortemporal\_1)  
2770 0.90338 (Left-Caudate)(Left-Pallidum)(Left-Putamen)(Left-Thalamus-Prop  
2771 0.90338 (Left-Caudate)(Left-Pallidum)(Left-Putamen)(lh.caudalmiddlefrontal\_3)  
2772 0.90338 (Left-Caudate)(Left-Pallidum)(lh.caudalmiddlefrontal\_3)  
2773 0.90338 (Left-Caudate)(Left-Putamen)(Left-Thalamus-Prop  
2774 0.90338 (Left-Caudate)(Left-Putamen)(lh.caudalanteriorcingulate\_2)(lh.caudalmiddlefrontal\_3)(lh.superiorfrontal\_11)  
2775 0.90338 (Left-Caudate)(Left-Putamen)(lh.parstriangularis\_3)(lh.rostralmiddlefrontal\_1)(lh.rostralmiddlefrontal\_9)  
2776 0.90338 (Left-Caudate)(lh.caudalanteriorcingulate\_2)(lh.caudalmiddlefrontal\_3)(lh.superiorfrontal\_12)  
2777 0.90338 (Left-Caudate)(lh.insula\_6)(lh.parsopercularis\_3)(lh.rostralmiddlefrontal\_1)  
2778 0.90338 (Left-Caudate)(lh.lateralorbitofrontal\_6)(lh.rostralmiddlefrontal\_9)  
2779 0.90338 (Left-Caudate)(lh.lateralorbitofrontal\_7)(lh.medialorbitofrontal\_2)(lh.rostralmiddlefrontal\_9)  
2780 0.90338 (Left-Caudate)(lh.parsopercularis\_3)(lh.parstriangularis\_3)  
2781 0.90338 (Left-Caudate)(lh.postcentral\_8)(lh.precentral\_7)  
2782 0.90338 (Left-Caudate)(lh.precentral\_4)(lh.superiorfrontal\_14)  
2783 0.90338 (Left-Caudate)(lh.superiorfrontal\_10)(lh.superiorfrontal\_4)(lh.superiorfrontal\_8)  
2784 0.90338 (Left-Caudate)(Right-Accumbens-area)  
2785 0.90338 (Left-Hippocampus)(lh.bankssts\_3)(lh.inferiorparietal\_5)  
2786 0.90338 (Left-Hippocampus)(lh.fusiform\_5)(lh.fusiform\_7)  
2787 0.90338 (Left-Hippocampus)(lh.lateraloccipital\_9)  
2788 0.90338 (Left-Pallidum)(Left-Putamen)(lh.caudalmiddlefrontal\_3)  
2789 0.90338 (Left-Pallidum)(lh.caudalmiddlefrontal\_3)  
2790 0.90338 (Left-Putamen)(Left-Thalamus-Prop  
2791 0.90338 (Left-Putamen)(lh.insula\_6)(lh.rostralmiddlefrontal\_9)  
2792 0.90338 (Left-Putamen)(lh.lateralorbitofrontal\_2)(lh.medialorbitofrontal\_2)  
2793 0.90338 (Left-Putamen)(lh.lateralorbitofrontal\_6)(lh.rostralmiddlefrontal\_1)(lh.rostralmiddlefrontal\_9)  
2794 0.90338 (Left-Putamen)(lh.lateralorbitofrontal\_7)(lh.medialorbitofrontal\_2)(lh.rostralanteriorcingulate\_1)  
2795 0.90338 (Left-Putamen)(lh.parsopercularis\_1)(lh.parsopercularis\_3)(lh.rostralmiddlefrontal\_1)  
2796 0.90338 (Left-Putamen)(lh.parstriangularis\_3)(lh.rostralanteriorcingulate\_1)(lh.rostralmiddlefrontal\_12)  
2797 0.90338 (Left-Thalamus-Prop  
2798 0.90338 (Left-Thalamus-Prop  
2799 0.90338 (lh.bankssts\_2)(lh.inferiortemporal\_7)  
2800 0.90338 (lh.fusiform\_2)(lh.lateraloccipital\_6)(lh.lateraloccipital\_7)(lh.pericalcarine\_3)



2801 0.90338 (lh.fusiform\_2)(lh.lateraloccipital\_7)(lh.lingual\_8)  
2802 0.90338 (lh.fusiform\_2)(lh.lingual\_6)(lh.lingual\_8)  
2803 0.90338 (lh.inferiortemporal\_3)(lh.middletemporal\_4)(lh.middletemporal\_5)  
2804 0.90338 (lh.lateraloccipital\_11)(lh.lateraloccipital\_6)(lh.pericalcarine\_2)  
2805 0.90338 (lh.lateraloccipital\_11)(lh.pericalcarine\_3)  
2806 0.90338 (lh.lateraloccipital\_6)(lh.lingual\_1)(lh.lingual\_4)  
2807 0.90338 (lh.lateralorbitofrontal\_2)(lh.lateralorbitofrontal\_7)(lh.medialorbitofrontal\_2)  
2808 0.90338 (lh.lateralorbitofrontal\_3)(lh.lateralorbitofrontal\_6)  
2809 0.90338 (lh.lateralorbitofrontal\_4)(lh.lateralorbitofrontal\_6)(lh.parstriangularis\_3)(lh.rostralmiddlefrontal\_12)(lh.rostralmiddlefrontal\_9)  
2810 0.90338 (lh.lateralorbitofrontal\_4)(lh.lateralorbitofrontal\_7)(lh.rostralmiddlefrontal\_9)  
2811 0.90338 (lh.lateralorbitofrontal\_6)(lh.rostralmiddlefrontal\_1)(lh.rostralmiddlefrontal\_6)(lh.rostralmiddlefrontal\_9)  
2812 0.90338 (lh.lateralorbitofrontal\_7)(lh.medialorbitofrontal\_2)(lh.rostralanteriorcingulate\_1)(lh.rostralmiddlefrontal\_12)  
2813 0.90338 (lh.lateralorbitofrontal\_7)(lh.rostralanteriorcingulate\_1)(lh.rostralmiddlefrontal\_9)  
2814 0.90338 (lh.medialorbitofrontal\_4)(lh.rostralanteriorcingulate\_1)  
2815 0.90338 (lh.parstriangularis\_3)(lh.rostralanteriorcingulate\_2)  
2816 0.90338 (lh.precuneus\_10)(lh.precuneus\_6)(lh.precuneus\_8)(lh.precuneus\_9)  
2817 0.90338 (lh.rostralanteriorcingulate\_2)(lh.superiorfrontal\_10)(lh.superiorfrontal\_4)  
2818 0.90338 (lh.rostralmiddlefrontal\_1)(lh.rostralmiddlefrontal\_7)(lh.rostralmiddlefrontal\_9)  
2819 0.90338 (lh.rostralmiddlefrontal\_4)(lh.superiorfrontal\_10)(lh.superiorfrontal\_11)  
2820 0.90338 (lh.superiorfrontal\_11)(lh.superiorfrontal\_14)(lh.superiorfrontal\_7)  
2821 0.90338 (lh.superiorfrontal\_11)(lh.superiorfrontal\_4)(lh.superiorfrontal\_6)  
2822 0.90338 (lh.superiorfrontal\_2)(lh.superiorfrontal\_3)(lh.superiorfrontal\_4)(lh.superiorfrontal\_5)  
2823 0.90338 (rh.bankssts\_2)(rh.bankssts\_3)(rh.superiortemporal\_3)  
2824 0.90338 (rh.fusiform\_1)(rh.lateraloccipital\_10)(rh.lateraloccipital\_7)(rh.lateraloccipital\_8)  
2825 0.90338 (rh.fusiform\_1)(rh.lateraloccipital\_8)(rh.pericalcarine\_1)  
2826 0.90338 (rh.inferiortemporal\_4)(rh.middletemporal\_4)(rh.middletemporal\_7)  
2827 0.90338 (rh.inferiortemporal\_7)(rh.middletemporal\_1)(rh.middletemporal\_2)  
2828 0.90338 (rh.isthmuscingulate\_2)(rh.precuneus\_3)(rh.precuneus\_4)(rh.precuneus\_7)  
2829 0.90338 (rh.lateraloccipital\_6)(rh.lateraloccipital\_7)  
2830 0.90338 (rh.lateralorbitofrontal\_2)(rh.lateralorbitofrontal\_7)(rh.parstriangularis\_1)  
2831 0.90338 (rh.middletemporal\_7)(rh.middletemporal\_8)  
2832 0.90338 (rh.paracentral\_3)(rh.paracentral\_4)(rh.precentral\_15)  
2833 0.90338 (rh.parsopercularis\_4)(rh.parstriangularis\_2)(rh.rostralmiddlefrontal\_3)  
2834 0.90338 (rh.parsorbitalis\_2)(rh.parstriangularis\_1)  
2835 0.90338 (rh.precentral\_7)(rh.supramarginal\_1)  
2836 0.90338 (rh.precuneus\_2)(rh.precuneus\_7)  
2837 0.90338 (rh.precuneus\_4)(rh.precuneus\_7)(rh.superiorparietal\_1)  
2838 0.90338 (rh.rostralanteriorcingulate\_1)(rh.rostralanteriorcingulate\_2)  
2839 0.90338 (rh.rostralmiddlefrontal\_11)(rh.rostralmiddlefrontal\_12)  
2840 0.90338 (rh.rostralmiddlefrontal\_8)(rh.rostralmiddlefrontal\_9)(rh.superiorfrontal\_2)  
2841 0.90338 (rh.superiorfrontal\_1)(rh.superiorfrontal\_2)(rh.superiorfrontal\_4)  
2842 0.90338 (rh.supramarginal\_1)(rh.supramarginal\_6)  
2843 0.90338 (Right-Accumbens-area)(Right-Amygdala)(Right-Pallidum)(Right-Putamen)(Right-Thalamus-Proper)  
2844 0.90338 (Right-Accumbens-area)(Right-Amygdala)(Right-Pallidum)(Right-Putamen)  
2845 0.90338 (Right-Accumbens-area)(Right-Amygdala)(Right-Putamen)(Right-Thalamus-Proper)  
2846 0.90338 (Right-Accumbens-area)(Right-Amygdala)(Right-Putamen)  
2847 0.90338 (Right-Caudate)(rh.parsopercularis\_4)(rh.rostralmiddlefrontal\_3)  
2848 0.90338 (Right-Caudate)(rh.rostralanteriorcingulate\_1)(rh.rostralanteriorcingulate\_2)  
2849 0.90338 (Right-Hippocampus)(rh.bankssts\_1)(rh.bankssts\_2)  
2850 0.90338 (Right-Hippocampus)(rh.inferiorparietal\_10)(rh.insula\_2)

2851 0.90338 (Right-Hippocampus)(rh.isthmuscingulate\_2)(rh.precuneus\_4)  
2852 0.90338 (Right-Putamen)(rh.insula\_1)(rh.precentral\_11)(rh.precentral\_7)  
2853 0.90338 (Right-Putamen)(rh.insula\_7)(rh.rostralmiddlefrontal\_3)  
2854 0.90338 (Right-Putamen)(rh.lateralorbitofrontal\_6)(rh.lateralorbitofrontal\_7)(rh.medialorbitofrontal\_2)  
2855 0.90338 (Right-Putamen)(rh.rostralmiddlefrontal\_9)  
2856 0.90338 (Right-Putamen)(rh.superiorfrontal\_2)(rh.superiorfrontal\_7)  
2857 0.90338 (Right-Putamen)(Right-Thalamus-Proprius)(rh.insula\_1)(rh.insula\_2)(rh.supramarginal\_9)  
2858 0.90338 (Right-Thalamus-Proprius)(rh.insula\_1)(rh.insula\_2)(rh.supramarginal\_9)  
2859 0.90338 (Right-Thalamus-Proprius)(rh.isthmuscingulate\_1)  
2860 0.90097 (Left-Caudate)(Left-Putamen)(lh.caudalanteriorcingulate\_2)(lh.superiorfrontal\_14)  
2861 0.90097 (Left-Caudate)(Left-Putamen)(lh.caudalmiddlefrontal\_3)(lh.caudalmiddlefrontal\_4)(lh.caudalmiddlefrontal\_5)  
2862 0.90097 (Left-Caudate)(Left-Putamen)(lh.parstriangularis\_3)(lh.rostralanteriorcingulate\_1)(lh.rostralmiddlefrontal\_9)  
2863 0.90097 (Left-Caudate)(Left-Putamen)(lh.rostralanteriorcingulate\_1)(lh.rostralmiddlefrontal\_4)  
2864 0.90097 (Left-Caudate)(Left-Putamen)(lh.supramarginal\_1)  
2865 0.90097 (Left-Caudate)(lh.lateralorbitofrontal\_2)(lh.medialorbitofrontal\_2)  
2866 0.90097 (Left-Caudate)(lh.lateralorbitofrontal\_4)(lh.rostralmiddlefrontal\_9)  
2867 0.90097 (Left-Caudate)(lh.lateralorbitofrontal\_7)(lh.medialorbitofrontal\_2)(lh.rostralanteriorcingulate\_1)  
2868 0.90097 (Left-Caudate)(lh.medialorbitofrontal\_4)(lh.rostralanteriorcingulate\_1)  
2869 0.90097 (Left-Caudate)(lh.parstriangularis\_3)(lh.rostralmiddlefrontal\_12)  
2870 0.90097 (Left-Caudate)(lh.rostralanteriorcingulate\_1)(lh.rostralanteriorcingulate\_2)(lh.rostralmiddlefrontal\_9)  
2871 0.90097 (Left-Hippocampus)(Left-Putamen)(lh.insula\_1)(lh.insula\_2)  
2872 0.90097 (Left-Hippocampus)(lh.bankssts\_3)(lh.fusiform\_5)  
2873 0.90097 (Left-Hippocampus)(lh.insula\_1)(lh.insula\_2)  
2874 0.90097 (Left-Putamen)(Left-Thalamus-Proprius)(lh.insula\_1)(lh.insula\_2)  
2875 0.90097 (Left-Putamen)(Left-Thalamus-Proprius)(lh.posteriorcingulate\_3)(lh.precentral\_4)  
2876 0.90097 (Left-Putamen)(Left-Thalamus-Proprius)(lh.precentral\_11)(lh.precentral\_4)(lh.precentral\_7)  
2877 0.90097 (Left-Putamen)(lh.insula\_6)(lh.parsopercularis\_1)(lh.rostralmiddlefrontal\_1)  
2878 0.90097 (Left-Putamen)(lh.lateralorbitofrontal\_4)(lh.lateralorbitofrontal\_6)(lh.lateralorbitofrontal\_7)(lh.parstriangularis\_3)  
2879 0.90097 (Left-Putamen)(lh.lateralorbitofrontal\_4)(lh.lateralorbitofrontal\_7)(lh.rostralmiddlefrontal\_9)  
2880 0.90097 (Left-Putamen)(lh.lateralorbitofrontal\_6)(lh.lateralorbitofrontal\_7)(lh.parstriangularis\_3)(lh.rostralmiddlefrontal\_12)  
2881 0.90097 (Left-Putamen)(lh.lateralorbitofrontal\_6)(lh.lateralorbitofrontal\_7)(lh.rostralmiddlefrontal\_12)(lh.rostralmiddlefrontal\_9)  
2882 0.90097 (Left-Putamen)(lh.parsopercularis\_1)(lh.parsopercularis\_3)(lh.parstriangularis\_3)  
2883 0.90097 (Left-Putamen)(lh.parstriangularis\_3)(lh.rostralanteriorcingulate\_1)(lh.rostralmiddlefrontal\_12)(lh.rostralmiddlefrontal\_9)  
2884 0.90097 (Left-Thalamus-Proprius)(lh.insula\_1)(lh.insula\_2)  
2885 0.90097 (Left-Thalamus-Proprius)(lh.paracentral\_5)(lh.precentral\_4)  
2886 0.90097 (Left-Thalamus-Proprius)(lh.precentral\_11)(lh.precentral\_9)  
2887 0.90097 (lh.bankssts\_2)(lh.inferiortemporal\_8)  
2888 0.90097 (lh.caudalanteriorcingulate\_2)(lh.rostralanteriorcingulate\_2)(lh.superiorfrontal\_11)  
2889 0.90097 (lh.caudalanteriorcingulate\_2)(lh.rostralanteriorcingulate\_2)(lh.superiorfrontal\_4)  
2890 0.90097 (lh.caudalmiddlefrontal\_4)(lh.precentral\_11)(lh.precentral\_9)  
2891 0.90097 (lh.cuneus\_1)(lh.lateraloccipital\_2)  
2892 0.90097 (lh.inferiorparietal\_4)(lh.lingual\_8)  
2893 0.90097 (lh.inferiorparietal\_5)(lh.inferiorparietal\_6)(lh.inferiorparietal\_9)  
2894 0.90097 (lh.inferiorparietal\_5)(lh.supramarginal\_7)  
2895 0.90097 (lh.insula\_1)(lh.postcentral\_14)(lh.supramarginal\_2)  
2896 0.90097 (lh.insula\_1)(lh.postcentral\_8)(lh.supramarginal\_9)  
2897 0.90097 (lh.insula\_3)(lh.precentral\_16)  
2898 0.90097 (lh.insula\_6)(lh.rostralmiddlefrontal\_1)(lh.rostralmiddlefrontal\_9)  
2899 0.90097 (lh.lateraloccipital\_1)(lh.lateraloccipital\_2)(lh.lateraloccipital\_3)(lh.pericalcarine\_2)  
2900 0.90097 (lh.lateraloccipital\_11)(lh.lateraloccipital\_3)(lh.pericalcarine\_2)

2901 0.90097 (lh.lateraloccipital\_6)(lh.lingual\_8)  
2902 0.90097 (lh.lateralorbitofrontal\_6)(lh.lateralorbitofrontal\_7)(lh.parstriangularis\_3)(lh.rostralmiddlefrontal\_12)(lh.rostralmiddlefrontal\_9)  
2903 0.90097 (lh.lateralorbitofrontal\_6)(lh.parstriangularis\_3)(lh.rostralmiddlefrontal\_12)(lh.rostralmiddlefrontal\_6)(lh.rostralmiddlefrontal\_9)  
2904 0.90097 (lh.lateralorbitofrontal\_7)(lh.medialorbitofrontal\_1)(lh.medialorbitofrontal\_2)  
2905 0.90097 (lh.lateralorbitofrontal\_7)(lh.parstriangularis\_3)(lh.rostralanteriorcingulate\_1)  
2906 0.90097 (lh.lingual\_1)(lh.lingual\_8)  
2907 0.90097 (lh.lingual\_3)(lh.pericalcarine\_2)  
2908 0.90097 (lh.lingual\_4)(lh.lingual\_5)  
2909 0.90097 (lh.middletemporal\_7)(lh.superiortemporal\_11)  
2910 0.90097 (lh.parstriangularis\_2)(lh.rostralmiddlefrontal\_9)  
2911 0.90097 (lh.precentral\_11)(lh.precentral\_8)  
2912 0.90097 (lh.precuneus\_5)(lh.precuneus\_6)  
2913 0.90097 (lh.precuneus\_6)(lh.precuneus\_9)(lh.superiorparietal\_6)  
2914 0.90097 (lh.rostralmiddlefrontal\_4)(lh.rostralmiddlefrontal\_8)(lh.rostralmiddlefrontal\_9)  
2915 0.90097 (lh.rostralmiddlefrontal\_8)(lh.superiorfrontal\_2)(lh.superiorfrontal\_4)  
2916 0.90097 (lh.superiorfrontal\_10)(lh.superiorfrontal\_4)(lh.superiorfrontal\_6)(lh.superiorfrontal\_8)  
2917 0.90097 (lh.superiorfrontal\_10)(lh.superiorfrontal\_6)(lh.superiorfrontal\_8)  
2918 0.90097 (lh.superiorfrontal\_10)(lh.superiorfrontal\_8)(lh.superiorfrontal\_9)  
2919 0.90097 (lh.superiorfrontal\_11)(lh.superiorfrontal\_14)(lh.superiorfrontal\_4)(lh.superiorfrontal\_8)  
2920 0.90097 (lh.superiorfrontal\_11)(lh.superiorfrontal\_14)(lh.superiorfrontal\_4)  
2921 0.90097 (lh.superiorfrontal\_11)(lh.superiorfrontal\_14)(lh.superiorfrontal\_7)(lh.superiorfrontal\_8)  
2922 0.90097 (lh.supramarginal\_1)(lh.supramarginal\_2)(lh.supramarginal\_4)  
2923 0.90097 (lh.supramarginal\_5)(lh.supramarginal\_9)  
2924 0.90097 (rh.bankssts\_2)(rh.middletemporal\_1)  
2925 0.90097 (rh.caudalanteriorcingulate\_3)(rh.posteriorcingulate\_2)  
2926 0.90097 (rh.caudalmiddlefrontal\_1)(rh.caudalmiddlefrontal\_3)(rh.caudalmiddlefrontal\_4)  
2927 0.90097 (rh.caudalmiddlefrontal\_4)(rh.superiorfrontal\_11)(rh.superiorfrontal\_9)  
2928 0.90097 (rh.cuneus\_3)(rh.lateraloccipital\_1)  
2929 0.90097 (rh.insula\_1)(rh.insula\_2)(rh.insula\_3)(rh.precentral\_7)  
2930 0.90097 (rh.lateraloccipital\_1)(rh.lateraloccipital\_3)(rh.pericalcarine\_4)  
2931 0.90097 (rh.lateraloccipital\_7)(rh.pericalcarine\_4)  
2932 0.90097 (rh.lateralorbitofrontal\_2)(rh.lateralorbitofrontal\_6)(rh.lateralorbitofrontal\_7)(rh.parstriangularis\_1)  
2933 0.90097 (rh.lateralorbitofrontal\_7)(rh.medialorbitofrontal\_2)(rh.superiorfrontal\_2)  
2934 0.90097 (rh.lateralorbitofrontal\_7)(rh.rostralmiddlefrontal\_12)(rh.rostralmiddlefrontal\_8)  
2935 0.90097 (rh.postcentral\_1)(rh.supramarginal\_7)(rh.supramarginal\_9)  
2936 0.90097 (rh.postcentral\_2)(rh.postcentral\_4)  
2937 0.90097 (rh.precentral\_13)(rh.superiorparietal\_1)  
2938 0.90097 (rh.rostralmiddlefrontal\_9)(rh.superiorfrontal\_2)(rh.superiorfrontal\_5)  
2939 0.90097 (rh.superiorfrontal\_11)(rh.superiorfrontal\_5)(rh.superiorfrontal\_7)(rh.superiorfrontal\_8)  
2940 0.90097 (rh.superiorfrontal\_11)(rh.superiorfrontal\_5)(rh.superiorfrontal\_7)  
2941 0.90097 (Right-Accumbens-area)(Right-Caudate)(Right-Hippocampus)(Right-Pallidum)(Right-Thalamus-Proper)  
2942 0.90097 (Right-Accumbens-area)(Right-Caudate)(Right-Hippocampus)(Right-Pallidum)  
2943 0.90097 (Right-Accumbens-area)(Right-Caudate)(Right-Hippocampus)(Right-Thalamus-Proper)  
2944 0.90097 (Right-Accumbens-area)(Right-Caudate)(Right-Hippocampus)  
2945 0.90097 (Right-Caudate)(rh.caudalanteriorcingulate\_3)(rh.posteriorcingulate\_2)  
2946 0.90097 (Right-Caudate)(rh.precentral\_11)(rh.precentral\_13)(rh.precentral\_7)  
2947 0.90097 (Right-Caudate)(rh.precentral\_11)(rh.precentral\_7)  
2948 0.90097 (Right-Caudate)(rh.rostralmiddlefrontal\_1)  
2949 0.90097 (Right-Caudate)(Right-Hippocampus)(Right-Thalamus-Proper)(rh.supramarginal\_9)  
2950 0.90097 (Right-Caudate)(Right-Putamen)(rh.caudalmiddlefrontal\_1)

2951 0.90097 (Right-Caudate)(Right-Putamen)(Right-Thalamus-Propert)(rh.posteriorcingulate\_2)  
2952 0.90097 (Right-Caudate)(Right-Thalamus-Propert)(rh.insula\_1)(rh.supramarginal\_9)  
2953 0.90097 (Right-Hippocampus)(rh.fusiform\_8)(rh.insula\_5)  
2954 0.90097 (Right-Hippocampus)(rh.insula\_2)(rh.insula\_5)  
2955 0.90097 (Right-Hippocampus)(rh.supramarginal\_8)  
2956 0.90097 (Right-Hippocampus)(Right-Putamen)(rh.insula\_2)(rh.insula\_5)  
2957 0.90097 (Right-Putamen)(rh.insula\_1)(rh.insula\_2)(rh.insula\_3)(rh.precentral\_7)  
2958 0.90097 (Right-Putamen)(rh.lateralorbitofrontal\_6)(rh.lateralorbitofrontal\_7)(rh.rostralmiddlefrontal\_13)  
2959 0.90097 (Right-Putamen)(rh.lateralorbitofrontal\_7)(rh.medialorbitofrontal\_2)(rh.rostralmiddlefrontal\_13)  
2960 0.90097 (Right-Putamen)(rh.lateralorbitofrontal\_7)(rh.superiorfrontal\_2)  
2961 0.90097 (Right-Putamen)(rh.postcentral\_1)(rh.precentral\_1)  
2962 0.90097 (Right-Putamen)(rh.precentral\_1)(rh.precentral\_6)  
2963 0.90097 (Right-Putamen)(rh.rostralmiddlefrontal\_11)  
2964 0.90097 (Right-Putamen)(rh.superiorparietal\_1)(rh.supramarginal\_1)(rh.supramarginal\_9)  
2965 0.90097 (Right-Putamen)(Right-Thalamus-Propert)(rh.posteriorcingulate\_2)  
2966 0.89855 (Left-Amygdala)(Left-Hippocampus)(Left-Putamen)(lh.insula\_2)  
2967 0.89855 (Left-Amygdala)(Left-Hippocampus)(lh.insula\_2)  
2968 0.89855 (Left-Amygdala)(Left-Putamen)(lh.insula\_2)  
2969 0.89855 (Left-Amygdala)(lh.insula\_2)  
2970 0.89855 (Left-Caudate)(Left-Putamen)(Left-Thalamus-Propert)(lh.posteriorcingulate\_3)(lh.precentral\_4)  
2971 0.89855 (Left-Caudate)(Left-Putamen)(lh.lateralorbitofrontal\_4)(lh.rostralmiddlefrontal\_9)  
2972 0.89855 (Left-Caudate)(Left-Putamen)(lh.lateralorbitofrontal\_7)(lh.parstriangularis\_3)  
2973 0.89855 (Left-Caudate)(lh.caudalanteriorcingulate\_2)(lh.superiorfrontal\_10)(lh.superiorfrontal\_11)  
2974 0.89855 (Left-Caudate)(lh.medialorbitofrontal\_2)(lh.superiorfrontal\_4)  
2975 0.89855 (Left-Caudate)(lh.parstriangularis\_3)(lh.rostralmiddlefrontal\_1)(lh.rostralmiddlefrontal\_4)(lh.rostralmiddlefrontal\_9)  
2976 0.89855 (Left-Caudate)(lh.rostralanteriorcingulate\_1)(lh.rostralmiddlefrontal\_9)(lh.superiorfrontal\_4)  
2977 0.89855 (Left-Caudate)(lh.rostralanteriorcingulate\_2)(lh.superiorfrontal\_11)  
2978 0.89855 (Left-Putamen)(Left-Thalamus-Propert)(lh.precentral\_11)(lh.precentral\_9)  
2979 0.89855 (Left-Putamen)(lh.caudalmiddlefrontal\_1)(lh.caudalmiddlefrontal\_5)  
2980 0.89855 (Left-Putamen)(lh.caudalmiddlefrontal\_4)(lh.precentral\_11)(lh.precentral\_9)  
2981 0.89855 (Left-Putamen)(lh.lateralorbitofrontal\_3)(lh.lateralorbitofrontal\_6)  
2982 0.89855 (Left-Putamen)(lh.lateralorbitofrontal\_4)(lh.lateralorbitofrontal\_6)(lh.lateralorbitofrontal\_7)(lh.rostralmiddlefrontal\_12)  
2983 0.89855 (Left-Putamen)(lh.lateralorbitofrontal\_6)(lh.parstriangularis\_3)(lh.rostralmiddlefrontal\_1)  
2984 0.89855 (Left-Putamen)(lh.medialorbitofrontal\_2)(lh.superiorfrontal\_3)  
2985 0.89855 (Left-Putamen)(lh.rostralanteriorcingulate\_1)(lh.rostralmiddlefrontal\_4)(lh.rostralmiddlefrontal\_9)  
2986 0.89855 (Left-Putamen)(lh.rostralmiddlefrontal\_4)(lh.superiorfrontal\_11)  
2987 0.89855 (Left-Putamen)(lh.superiorfrontal\_10)  
2988 0.89855 (lh.caudalmiddlefrontal\_1)(lh.superiorfrontal\_11)  
2989 0.89855 (lh.cuneus\_1)(lh.cuneus\_2)(lh.pericalcarine\_1)  
2990 0.89855 (lh.fusiform\_1)(lh.fusiform\_4)(lh.fusiform\_5)  
2991 0.89855 (lh.fusiform\_2)(lh.lateraloccipital\_6)(lh.lingual\_8)  
2992 0.89855 (lh.fusiform\_5)(lh.fusiform\_6)(lh.fusiform\_7)  
2993 0.89855 (lh.insula\_2)(lh.precentral\_9)  
2994 0.89855 (lh.insula\_6)(lh.parsopercularis\_3)(lh.parstriangularis\_3)(lh.rostralmiddlefrontal\_1)  
2995 0.89855 (lh.lateraloccipital\_3)(lh.lateraloccipital\_6)(lh.pericalcarine\_3)  
2996 0.89855 (lh.lateraloccipital\_3)(lh.lingual\_1)(lh.pericalcarine\_3)  
2997 0.89855 (lh.lateralorbitofrontal\_2)(lh.medialorbitofrontal\_5)  
2998 0.89855 (lh.lateralorbitofrontal\_4)(lh.lateralorbitofrontal\_7)(lh.parstriangularis\_3)(lh.rostralmiddlefrontal\_12)  
2999 0.89855 (lh.lingual\_6)(lh.pericalcarine\_3)(lh.precuneus\_11)  
3000 0.89855 (lh.paracentral\_4)(lh.superiorfrontal\_18)

3001 0.89855 (lh.paracentral\_5)(lh.precentral\_2)(lh.precentral\_3)  
3002 0.89855 (lh.parsopercularis\_1)(lh.precentral\_14)  
3003 0.89855 (lh.parsopercularis\_1)(lh.precentral\_16)  
3004 0.89855 (lh.parstriangularis\_2)(lh.parstriangularis\_3)(lh.rostralmiddlefrontal\_9)  
3005 0.89855 (lh.postcentral\_11)(lh.postcentral\_14)  
3006 0.89855 (lh.postcentral\_12)(lh.precentral\_14)  
3007 0.89855 (lh.postcentral\_3)(lh.supramarginal\_9)  
3008 0.89855 (lh.posteriorcingulate\_4)(lh.precuneus\_3)  
3009 0.89855 (lh.precentral\_11)(lh.precentral\_7)(lh.precentral\_9)  
3010 0.89855 (lh.precuneus\_6)(lh.precuneus\_8)(lh.precuneus\_9)(lh.superiorparietal\_11)  
3011 0.89855 (lh.rostralanteriorcingulate\_1)(lh.rostralmiddlefrontal\_4)(lh.superiorfrontal\_4)  
3012 0.89855 (lh.rostralanteriorcingulate\_1)(lh.rostralmiddlefrontal\_9)(lh.superiorfrontal\_3)(lh.superiorfrontal\_4)  
3013 0.89855 (lh.rostralanteriorcingulate\_2)(lh.superiorfrontal\_11)(lh.superiorfrontal\_4)  
3014 0.89855 (lh.rostralmiddlefrontal\_4)(lh.superiorfrontal\_3)(lh.superiorfrontal\_4)  
3015 0.89855 (lh.superiorfrontal\_10)(lh.superiorfrontal\_7)(lh.superiorfrontal\_8)(lh.superiorfrontal\_9)  
3016 0.89855 (lh.supramarginal\_2)(lh.supramarginal\_3)  
3017 0.89855 (rh.bankssts\_2)(rh.inferiorparietal\_9)  
3018 0.89855 (rh.fusiform\_2)(rh.lateraloccipital\_10)(rh.lingual\_5)  
3019 0.89855 (rh.inferiorparietal\_10)(rh.inferiorparietal\_11)(rh.lateraloccipital\_8)  
3020 0.89855 (rh.inferiorparietal\_4)(rh.inferiorparietal\_6)  
3021 0.89855 (rh.inferiorparietal\_4)(rh.supramarginal\_8)(rh.supramarginal\_9)  
3022 0.89855 (rh.inferiortemporal\_2)(rh.middletemporal\_4)(rh.middletemporal\_7)  
3023 0.89855 (rh.inferiortemporal\_6)(rh.inferiortemporal\_7)(rh.middletemporal\_2)  
3024 0.89855 (rh.isthmuscingulate\_2)(rh.lingual\_7)(rh.precuneus\_2)  
3025 0.89855 (rh.lateraloccipital\_3)(rh.lateraloccipital\_8)  
3026 0.89855 (rh.lateralorbitofrontal\_2)(rh.lateralorbitofrontal\_4)(rh.lateralorbitofrontal\_6)  
3027 0.89855 (rh.paracentral\_6)(rh.precuneus\_10)  
3028 0.89855 (rh.parahippocampal\_2)(rh.parahippocampal\_3)  
3029 0.89855 (rh.parstriangularis\_1)(rh.parstriangularis\_2)(rh.parstriangularis\_3)  
3030 0.89855 (rh.parstriangularis\_1)(rh.parstriangularis\_2)(rh.parstriangularis\_4)(rh.rostralmiddlefrontal\_3)  
3031 0.89855 (rh.pericalcarine\_1)(rh.pericalcarine\_3)  
3032 0.89855 (rh.precentral\_10)(rh.precentral\_6)  
3033 0.89855 (rh.precuneus\_4)(rh.precuneus\_5)(rh.precuneus\_7)  
3034 0.89855 (rh.rostralmiddlefrontal\_3)(rh.rostralmiddlefrontal\_5)(rh.rostralmiddlefrontal\_6)(rh.rostralmiddlefrontal\_8)  
3035 0.89855 (rh.superiorfrontal\_10)(rh.superiorfrontal\_13)(rh.superiorfrontal\_9)  
3036 0.89855 (rh.superiorfrontal\_4)(rh.superiorfrontal\_5)(rh.superiorfrontal\_7)  
3037 0.89855 (Right-Amygdala)(rh.insula\_4)  
3038 0.89855 (Right-Amygdala)(Right-Caudate)(Right-Pallidum)(Right-Putamen)(Right-Thalamus-Proper)  
3039 0.89855 (Right-Amygdala)(Right-Caudate)(Right-Pallidum)(Right-Putamen)  
3040 0.89855 (Right-Amygdala)(Right-Caudate)(Right-Pallidum)(Right-Thalamus-Proper)  
3041 0.89855 (Right-Amygdala)(Right-Caudate)(Right-Pallidum)  
3042 0.89855 (Right-Amygdala)(Right-Caudate)(Right-Putamen)(Right-Thalamus-Proper)  
3043 0.89855 (Right-Amygdala)(Right-Caudate)(Right-Putamen)  
3044 0.89855 (Right-Amygdala)(Right-Caudate)(Right-Thalamus-Proper)  
3045 0.89855 (Right-Amygdala)(Right-Caudate)  
3046 0.89855 (Right-Amygdala)(Right-Putamen)(rh.insula\_4)  
3047 0.89855 (Right-Caudate)(rh.caudalmiddlefrontal\_4)(rh.insula\_7)  
3048 0.89855 (Right-Caudate)(rh.caudalmiddlefrontal\_4)(rh.superiorfrontal\_11)(rh.superiorfrontal\_13)  
3049 0.89855 (Right-Caudate)(rh.lateralorbitofrontal\_4)(rh.lateralorbitofrontal\_5)  
3050 0.89855 (Right-Caudate)(rh.superiorfrontal\_2)(rh.superiorfrontal\_7)

3051 0.89855 (Right-Caudate)(Right-Hippocampus)(Right-Putamen)(Right-Thalamus-Proper)(rh.supramarginal\_9)  
3052 0.89855 (Right-Caudate)(Right-Putamen)(rh.caudalmiddlefrontal\_4)(rh.insula\_7)  
3053 0.89855 (Right-Caudate)(Right-Putamen)(Right-Thalamus-Proper)(rh.insula\_1)(rh.supramarginal\_9)  
3054 0.89855 (Right-Hippocampus)(rh.middletemporal\_1)  
3055 0.89855 (Right-Hippocampus)(rh.superiortemporal\_3)(rh.superiortemporal\_6)  
3056 0.89855 (Right-Putamen)(rh.caudalmiddlefrontal\_4)(rh.rostralmiddlefrontal\_1)  
3057 0.89855 (Right-Putamen)(rh.insula\_1)(rh.superiorparietal\_1)(rh.supramarginal\_1)  
3058 0.89855 (Right-Putamen)(rh.lateralorbitofrontal\_2)(rh.lateralorbitofrontal\_4)(rh.lateralorbitofrontal\_6)  
3059 0.89855 (Right-Putamen)(rh.lateralorbitofrontal\_6)(rh.lateralorbitofrontal\_7)(rh.parstriangularis\_1)(rh.rostralmiddlefrontal\_12)  
3060 0.89855 (Right-Putamen)(rh.lateralorbitofrontal\_7)(rh.rostralmiddlefrontal\_8)  
3061 0.89855 (Right-Putamen)(rh.postcentral\_8)  
3062 0.89855 (Right-Putamen)(rh.rostralmiddlefrontal\_3)(rh.rostralmiddlefrontal\_5)(rh.rostralmiddlefrontal\_8)  
3063 0.89855 (Right-Putamen)(rh.superiorfrontal\_14)  
3064 0.89855 (Right-Thalamus-Proper)(rh.precentral\_11)(rh.precentral\_13)  
3065 0.89614 (Left-Caudate)(Left-Putamen)(lh.caudalmiddlefrontal\_1)(lh.rostralmiddlefrontal\_4)  
3066 0.89614 (Left-Caudate)(Left-Putamen)(lh.caudalmiddlefrontal\_6)(lh.precentral\_11)(lh.precentral\_9)  
3067 0.89614 (Left-Caudate)(Left-Putamen)(lh.medialorbitofrontal\_2)(lh.rostralmiddlefrontal\_12)(lh.rostralmiddlefrontal\_9)  
3068 0.89614 (Left-Caudate)(Left-Putamen)(lh.rostralanteriorcingulate\_1)(lh.rostralanteriorcingulate\_2)(lh.superiorfrontal\_4)  
3069 0.89614 (Left-Caudate)(Left-Putamen)(lh.rostralanteriorcingulate\_2)(lh.rostralmiddlefrontal\_9)  
3070 0.89614 (Left-Caudate)(Left-Thalamus-Proper)(lh.precentral\_11)(lh.precentral\_9)  
3071 0.89614 (Left-Caudate)(lh.caudalanteriorcingulate\_2)(lh.superiorfrontal\_4)  
3072 0.89614 (Left-Hippocampus)(lh.fusiform\_5)(lh.fusiform\_6)  
3073 0.89614 (Left-Putamen)(Left-Thalamus-Proper)(lh.insula\_1)(lh.supramarginal\_1)  
3074 0.89614 (Left-Putamen)(Left-Thalamus-Proper)(lh.supramarginal\_1)  
3075 0.89614 (Left-Putamen)(lh.insula\_2)(lh.precentral\_9)  
3076 0.89614 (Left-Putamen)(lh.lateralorbitofrontal\_4)(lh.lateralorbitofrontal\_6)(lh.parstriangularis\_3)(lh.rostralmiddlefrontal\_12)  
3077 0.89614 (Left-Putamen)(lh.lateralorbitofrontal\_4)(lh.rostralanteriorcingulate\_1)  
3078 0.89614 (Left-Putamen)(lh.medialorbitofrontal\_4)(lh.medialorbitofrontal\_5)  
3079 0.89614 (Left-Putamen)(lh.precentral\_7)(lh.precentral\_9)  
3080 0.89614 (Left-Putamen)(lh.rostralanteriorcingulate\_1)(lh.rostralanteriorcingulate\_2)(lh.rostralmiddlefrontal\_9)  
3081 0.89614 (Left-Putamen)(lh.rostralmiddlefrontal\_12)(lh.superiorfrontal\_3)  
3082 0.89614 (Left-Putamen)(lh.rostralmiddlefrontal\_9)(lh.superiorfrontal\_4)  
3083 0.89614 (Left-Putamen)(lh.superiorfrontal\_12)(lh.superiorfrontal\_14)  
3084 0.89614 (lh.caudalmiddlefrontal\_3)(lh.parstriangularis\_3)  
3085 0.89614 (lh.cuneus\_3)(lh.pericalcarine\_1)  
3086 0.89614 (lh.fusiform\_2)(lh.lingual\_1)(lh.lingual\_4)(lh.pericalcarine\_3)  
3087 0.89614 (lh.fusiform\_7)(lh.inferiortemporal\_3)(lh.middletemporal\_4)  
3088 0.89614 (lh.inferiorparietal\_8)(lh.superiorparietal\_6)  
3089 0.89614 (lh.insula\_6)(lh.parstriangularis\_3)(lh.rostralmiddlefrontal\_9)  
3090 0.89614 (lh.isthmuscingulate\_1)(lh.posteriorcingulate\_2)  
3091 0.89614 (lh.lateralorbitofrontal\_4)(lh.rostralanteriorcingulate\_1)  
3092 0.89614 (lh.lateralorbitofrontal\_6)(lh.parsorbitalis\_1)(lh.rostralmiddlefrontal\_6)  
3093 0.89614 (lh.medialorbitofrontal\_2)(lh.parstriangularis\_3)  
3094 0.89614 (lh.parsopercularis\_2)(lh.parsopercularis\_3)  
3095 0.89614 (lh.parsorbitalis\_1)(lh.parstriangularis\_1)(lh.parstriangularis\_3)  
3096 0.89614 (lh.postcentral\_8)(lh.precentral\_4)(lh.precentral\_7)  
3097 0.89614 (lh.precentral\_4)(lh.precentral\_6)  
3098 0.89614 (lh.precuneus\_10)(lh.precuneus\_11)(lh.precuneus\_6)(lh.precuneus\_9)  
3099 0.89614 (lh.precuneus\_10)(lh.precuneus\_6)(lh.superiorparietal\_11)  
3100 0.89614 (lh.precuneus\_9)(lh.superiorparietal\_5)

3101 0.89614 (lh.superiorfrontal\_10)(lh.superiorfrontal\_14)(lh.superiorfrontal\_8)  
3102 0.89614 (lh.superiorfrontal\_10)(lh.superiorfrontal\_14)  
3103 0.89614 (lh.superiorfrontal\_10)(lh.superiorfrontal\_4)(lh.superiorfrontal\_6)(lh.superiorfrontal\_7)(lh.superiorfrontal\_8)  
3104 0.89614 (lh.superiorfrontal\_10)(lh.superiorfrontal\_6)(lh.superiorfrontal\_7)(lh.superiorfrontal\_8)  
3105 0.89614 (lh.superiorfrontal\_11)(lh.superiorfrontal\_6)(lh.superiorfrontal\_7)  
3106 0.89614 (lh.superiorfrontal\_17)(lh.superiorfrontal\_18)  
3107 0.89614 (rh.bankssts\_2)(rh.superiortemporal\_1)(rh.superiortemporal\_3)  
3108 0.89614 (rh.caudalmiddlefrontal\_4)(rh.insula\_7)(rh.parsopercularis\_4)  
3109 0.89614 (rh.caudalmiddlefrontal\_4)(rh.rostralmiddlefrontal\_1)(rh.rostralmiddlefrontal\_3)  
3110 0.89614 (rh.fusiform\_1)(rh.inferiorparietal\_10)(rh.lateraloccipital\_10)(rh.lateraloccipital\_8)  
3111 0.89614 (rh.fusiform\_1)(rh.lateraloccipital\_10)(rh.lingual\_7)  
3112 0.89614 (rh.fusiform\_6)(rh.inferiortemporal\_6)  
3113 0.89614 (rh.insula\_7)(rh.parsopercularis\_4)(rh.rostralmiddlefrontal\_3)  
3114 0.89614 (rh.lateraloccipital\_3)(rh.lateraloccipital\_4)(rh.pericalcarine\_1)  
3115 0.89614 (rh.lateraloccipital\_4)(rh.lateraloccipital\_7)(rh.lateraloccipital\_8)(rh.lingual\_2)  
3116 0.89614 (rh.lateraloccipital\_5)(rh.lateraloccipital\_6)  
3117 0.89614 (rh.lateralorbitofrontal\_4)(rh.lateralorbitofrontal\_6)(rh.lateralorbitofrontal\_7)  
3118 0.89614 (rh.lateralorbitofrontal\_7)(rh.medialorbitofrontal\_4)  
3119 0.89614 (rh.lingual\_1)(rh.lingual\_2)  
3120 0.89614 (rh.medialorbitofrontal\_1)(rh.rostralmiddlefrontal\_11)  
3121 0.89614 (rh.middletemporal\_4)(rh.middletemporal\_5)  
3122 0.89614 (rh.parsopercularis\_2)(rh.parstriangularis\_1)  
3123 0.89614 (rh.parstriangularis\_1)(rh.rostralmiddlefrontal\_5)  
3124 0.89614 (rh.precentral\_5)(rh.precentral\_6)(rh.precentral\_8)  
3125 0.89614 (rh.superiorfrontal\_1)(rh.superiorfrontal\_3)  
3126 0.89614 (rh.superiorfrontal\_11)(rh.superiorfrontal\_12)(rh.superiorfrontal\_16)  
3127 0.89614 (rh.superiorfrontal\_11)(rh.superiorfrontal\_14)  
3128 0.89614 (rh.superiorfrontal\_2)(rh.superiorfrontal\_7)(rh.superiorfrontal\_8)  
3129 0.89614 (rh.superiorfrontal\_2)(rh.superiorfrontal\_9)  
3130 0.89614 (Right-Caudate)(Right-Pallidum)(rh.posteriorcingulate\_2)  
3131 0.89614 (Right-Caudate)(Right-Putamen)(rh.superiorfrontal\_11)  
3132 0.89614 (Right-Caudate)(Right-Putamen)(Right-Thalamus-Proper)(rh.precentral\_11)  
3133 0.89614 (Right-Pallidum)(rh.posteriorcingulate\_2)  
3134 0.89614 (Right-Putamen)(rh.caudalmiddlefrontal\_4)(rh.insula\_7)(rh.parsopercularis\_4)  
3135 0.89614 (Right-Putamen)(rh.lateralorbitofrontal\_4)(rh.lateralorbitofrontal\_5)(rh.lateralorbitofrontal\_7)  
3136 0.89614 (Right-Putamen)(rh.precentral\_11)(rh.supramarginal\_1)  
3137 0.89372 (Left-Accumbens-area)(lh.medialorbitofrontal\_4)  
3138 0.89372 (Left-Caudate)(Left-Putamen)(Left-Thalamus-Proper)(lh.precentral\_11)(lh.precentral\_9)  
3139 0.89372 (Left-Caudate)(Left-Putamen)(lh.lateralorbitofrontal\_7)(lh.medialorbitofrontal\_2)(lh.rostralmiddlefrontal\_12)  
3140 0.89372 (Left-Caudate)(Left-Putamen)(lh.lateralorbitofrontal\_7)(lh.medialorbitofrontal\_2)(lh.rostralmiddlefrontal\_9)  
3141 0.89372 (Left-Caudate)(Left-Putamen)(lh.medialorbitofrontal\_2)(lh.rostralanteriorcingulate\_1)(lh.rostralmiddlefrontal\_12)  
3142 0.89372 (Left-Caudate)(Left-Putamen)(lh.postcentral\_8)(lh.precentral\_4)  
3143 0.89372 (Left-Caudate)(lh.insula\_6)(lh.rostralmiddlefrontal\_9)  
3144 0.89372 (Left-Caudate)(lh.lateralorbitofrontal\_4)(lh.parstriangularis\_3)  
3145 0.89372 (Left-Caudate)(lh.lateralorbitofrontal\_6)(lh.parstriangularis\_3)  
3146 0.89372 (Left-Caudate)(lh.rostralmiddlefrontal\_8)(lh.superiorfrontal\_4)  
3147 0.89372 (Left-Caudate)(lh.superiorfrontal\_14)(lh.superiorfrontal\_4)  
3148 0.89372 (Left-Hippocampus)(lh.bankssts\_2)(lh.bankssts\_3)  
3149 0.89372 (Left-Putamen)(lh.insula\_6)(lh.rostralmiddlefrontal\_1)(lh.rostralmiddlefrontal\_4)  
3150 0.89372 (Left-Putamen)(lh.lateralorbitofrontal\_4)(lh.parstriangularis\_3)(lh.rostralmiddlefrontal\_12)(lh.rostralmiddlefrontal\_9)

3151 0.89372 (Left-Putamen)(lh.lateralorbitofrontal\_7)(lh.parstriangularis\_3)(lh.rostralmiddlefrontal\_12)(lh.rostralmiddlefrontal\_9)  
3152 0.89372 (Left-Putamen)(lh.lateralorbitofrontal\_7)(lh.rostralanteriorcingulate\_1)(lh.rostralmiddlefrontal\_9)  
3153 0.89372 (Left-Putamen)(lh.rostralanteriorcingulate\_1)(lh.superiorfrontal\_3)  
3154 0.89372 (lh.caudalanteriorcingulate\_1)(lh.superiorfrontal\_10)  
3155 0.89372 (lh.caudalanteriorcingulate\_2)(lh.caudalmiddlefrontal\_5)  
3156 0.89372 (lh.caudalmiddlefrontal\_2)(lh.caudalmiddlefrontal\_4)  
3157 0.89372 (lh.cuneus\_1)(lh.cuneus\_2)(lh.superiorparietal\_14)  
3158 0.89372 (lh.cuneus\_2)(lh.pericalcarine\_1)(lh.superiorparietal\_14)  
3159 0.89372 (lh.fusiform\_2)(lh.lateraloccipital\_8)  
3160 0.89372 (lh.inferiorparietal\_1)(lh.lateraloccipital\_2)  
3161 0.89372 (lh.inferiorparietal\_1)(lh.lateraloccipital\_7)(lh.pericalcarine\_3)  
3162 0.89372 (lh.inferiorparietal\_7)(lh.inferiorparietal\_8)(lh.inferiorparietal\_9)  
3163 0.89372 (lh.inferiortemporal\_5)(lh.middletemporal\_3)  
3164 0.89372 (lh.inferiortemporal\_8)(lh.middletemporal\_2)  
3165 0.89372 (lh.insula\_1)(lh.postcentral\_14)(lh.supramarginal\_1)  
3166 0.89372 (lh.insula\_1)(lh.supramarginal\_1)(lh.supramarginal\_4)  
3167 0.89372 (lh.insula\_2)(lh.precentral\_11)(lh.precentral\_9)  
3168 0.89372 (lh.lateraloccipital\_2)(lh.lateraloccipital\_3)(lh.lateraloccipital\_6)  
3169 0.89372 (lh.lateraloccipital\_6)(lh.lateraloccipital\_9)  
3170 0.89372 (lh.lateraloccipital\_6)(lh.lingual\_4)(lh.pericalcarine\_3)  
3171 0.89372 (lh.lateralorbitofrontal\_4)(lh.lateralorbitofrontal\_6)(lh.lateralorbitofrontal\_7)(lh.rostralmiddlefrontal\_9)  
3172 0.89372 (lh.lateralorbitofrontal\_7)(lh.medialorbitofrontal\_2)(lh.medialorbitofrontal\_4)  
3173 0.89372 (lh.lingual\_5)(lh.lingual\_8)  
3174 0.89372 (lh.medialorbitofrontal\_1)(lh.superiorfrontal\_1)  
3175 0.89372 (lh.paracentral\_4)(lh.paracentral\_5)(lh.precentral\_2)(lh.precentral\_3)  
3176 0.89372 (lh.pericalcarine\_2)(lh.superiorparietal\_12)  
3177 0.89372 (lh.rostralmiddlefrontal\_4)(lh.rostralmiddlefrontal\_9)(lh.superiorfrontal\_3)  
3178 0.89372 (lh.rostralmiddlefrontal\_9)(lh.superiorfrontal\_2)  
3179 0.89372 (lh.superiorfrontal\_10)(lh.superiorfrontal\_11)(lh.superiorfrontal\_7)(lh.superiorfrontal\_9)  
3180 0.89372 (lh.superiorfrontal\_11)(lh.superiorfrontal\_4)(lh.superiorfrontal\_6)(lh.superiorfrontal\_7)  
3181 0.89372 (lh.superiorfrontal\_11)(lh.superiorfrontal\_4)(lh.superiorfrontal\_9)  
3182 0.89372 (rh.bankssts\_2)(rh.bankssts\_3)(rh.inferiorparietal\_4)  
3183 0.89372 (rh.fusiform\_3)(rh.lateraloccipital\_10)(rh.lateraloccipital\_8)  
3184 0.89372 (rh.fusiform\_3)(rh.lateraloccipital\_8)  
3185 0.89372 (rh.inferiorparietal\_10)(rh.lingual\_5)  
3186 0.89372 (rh.inferiorparietal\_10)(rh.superiorparietal\_11)  
3187 0.89372 (rh.inferiorparietal\_12)(rh.lateraloccipital\_4)(rh.superiorparietal\_11)  
3188 0.89372 (rh.inferiortemporal\_3)(rh.middletemporal\_6)  
3189 0.89372 (rh.inferiortemporal\_3)(rh.middletemporal\_7)  
3190 0.89372 (rh.lateraloccipital\_1)(rh.superiorparietal\_11)  
3191 0.89372 (rh.lateraloccipital\_4)(rh.pericalcarine\_1)(rh.superiorparietal\_11)  
3192 0.89372 (rh.lateraloccipital\_5)(rh.lateraloccipital\_7)(rh.lateraloccipital\_8)  
3193 0.89372 (rh.lateralorbitofrontal\_2)(rh.parstriangularis\_1)(rh.rostralmiddlefrontal\_8)  
3194 0.89372 (rh.lingual\_7)(rh.pericalcarine\_1)  
3195 0.89372 (rh.medialorbitofrontal\_2)(rh.rostralmiddlefrontal\_12)(rh.superiorfrontal\_2)  
3196 0.89372 (rh.paracentral\_4)(rh.superiorfrontal\_14)  
3197 0.89372 (rh.parstriangularis\_1)(rh.parstriangularis\_3)(rh.parstriangularis\_4)  
3198 0.89372 (rh.parstriangularis\_1)(rh.rostralmiddlefrontal\_12)(rh.rostralmiddlefrontal\_3)(rh.rostralmiddlefrontal\_8)  
3199 0.89372 (rh.parstriangularis\_1)(rh.rostralmiddlefrontal\_5)(rh.rostralmiddlefrontal\_8)  
3200 0.89372 (rh.rostralmiddlefrontal\_12)(rh.rostralmiddlefrontal\_5)



3201 0.89372 (rh.rostralmiddlefrontal\_9)(rh.superiorfrontal\_2)(rh.superiorfrontal\_7)  
3202 0.89372 (rh.superiorfrontal\_2)(rh.superiorfrontal\_3)(rh.superiorfrontal\_4)  
3203 0.89372 (rh.superiorfrontal\_2)(rh.superiorfrontal\_6)(rh.superiorfrontal\_8)  
3204 0.89372 (Right-Caudate)(rh.insula\_2)  
3205 0.89372 (Right-Caudate)(rh.lateralorbitofrontal\_5)(rh.lateralorbitofrontal\_7)  
3206 0.89372 (Right-Caudate)(rh.superiorfrontal\_11)(rh.superiorfrontal\_9)  
3207 0.89372 (Right-Caudate)(rh.superiorfrontal\_7)(rh.superiorfrontal\_9)  
3208 0.89372 (Right-Caudate)(Right-Pallidum)(Right-Putamen)(rh.posteriorcingulate\_2)  
3209 0.89372 (Right-Caudate)(Right-Putamen)(rh.insula\_2)  
3210 0.89372 (Right-Caudate)(Right-Putamen)(Right-Thalamus-Proper)(rh.insula\_2)  
3211 0.89372 (Right-Caudate)(Right-Thalamus-Proper)(rh.insula\_2)  
3212 0.89372 (Right-Hippocampus)(rh.inferiorparietal\_4)(rh.insula\_2)  
3213 0.89372 (Right-Hippocampus)(rh.insula\_5)(rh.superiortemporal\_10)  
3214 0.89372 (Right-Hippocampus)(rh.isthmuscingulate\_2)(rh.precuneus\_3)(rh.precuneus\_7)  
3215 0.89372 (Right-Pallidum)(Right-Putamen)(rh.posteriorcingulate\_2)  
3216 0.89372 (Right-Putamen)(rh.caudalmiddlefrontal\_4)(rh.rostralmiddlefrontal\_5)  
3217 0.89372 (Right-Putamen)(rh.caudalmiddlefrontal\_4)(rh.superiorfrontal\_11)  
3218 0.89372 (Right-Putamen)(rh.lateralorbitofrontal\_2)(rh.lateralorbitofrontal\_7)(rh.parstriangularis\_1)  
3219 0.89372 (Right-Putamen)(rh.lateralorbitofrontal\_4)(rh.lateralorbitofrontal\_6)(rh.lateralorbitofrontal\_7)  
3220 0.89372 (Right-Putamen)(rh.postcentral\_9)  
3221 0.8913 (Left-Accumbens-area)(Left-Amygdala)(Left-Pallidum)(Left-Thalamus-Proper)  
3222 0.8913 (Left-Accumbens-area)(Left-Amygdala)(Left-Pallidum)  
3223 0.8913 (Left-Accumbens-area)(Left-Amygdala)(Left-Thalamus-Proper)  
3224 0.8913 (Left-Accumbens-area)(Left-Amygdala)  
3225 0.8913 (Left-Amygdala)(Left-Hippocampus)(lh.fusiform\_8)  
3226 0.8913 (Left-Caudate)(Left-Putamen)(lh.lateralorbitofrontal\_6)(lh.rostralmiddlefrontal\_9)  
3227 0.8913 (Left-Caudate)(Left-Putamen)(lh.lateralorbitofrontal\_7)(lh.medialorbitofrontal\_4)  
3228 0.8913 (Left-Caudate)(Left-Putamen)(lh.medialorbitofrontal\_4)(lh.medialorbitofrontal\_5)  
3229 0.8913 (Left-Caudate)(lh.caudalanteriorcingulate\_2)(lh.rostralanteriorcingulate\_2)(lh.superiorfrontal\_11)  
3230 0.8913 (Left-Caudate)(lh.caudalanteriorcingulate\_2)(lh.superiorfrontal\_11)(lh.superiorfrontal\_12)(lh.superiorfrontal\_8)  
3231 0.8913 (Left-Caudate)(lh.caudalanteriorcingulate\_2)(lh.superiorfrontal\_12)(lh.superiorfrontal\_14)(lh.superiorfrontal\_8)  
3232 0.8913 (Left-Caudate)(lh.lateralorbitofrontal\_7)(lh.parstriangularis\_3)(lh.rostralmiddlefrontal\_9)  
3233 0.8913 (Left-Caudate)(lh.medialorbitofrontal\_2)(lh.rostralanteriorcingulate\_1)(lh.rostralmiddlefrontal\_12)(lh.rostralmiddlefrontal\_9)  
3234 0.8913 (Left-Caudate)(lh.parstriangularis\_3)(lh.rostralmiddlefrontal\_12)(lh.rostralmiddlefrontal\_9)  
3235 0.8913 (Left-Caudate)(lh.rostralanteriorcingulate\_1)(lh.rostralmiddlefrontal\_4)(lh.rostralmiddlefrontal\_9)  
3236 0.8913 (Left-Caudate)(lh.rostralanteriorcingulate\_2)(lh.superiorfrontal\_10)  
3237 0.8913 (Left-Caudate)(lh.rostralmiddlefrontal\_4)(lh.rostralmiddlefrontal\_9)(lh.superiorfrontal\_4)  
3238 0.8913 (Left-Caudate)(lh.rostralmiddlefrontal\_4)(lh.superiorfrontal\_10)(lh.superiorfrontal\_4)  
3239 0.8913 (Left-Caudate)(lh.superiorfrontal\_10)(lh.superiorfrontal\_11)(lh.superiorfrontal\_4)(lh.superiorfrontal\_8)  
3240 0.8913 (Left-Caudate)(lh.superiorfrontal\_11)(lh.superiorfrontal\_12)(lh.superiorfrontal\_14)(lh.superiorfrontal\_8)  
3241 0.8913 (Left-Caudate)(Right-Accumbens-area)(Right-Caudate)  
3242 0.8913 (Left-Putamen)(lh.caudalanteriorcingulate\_2)(lh.superiorfrontal\_11)(lh.superiorfrontal\_12)  
3243 0.8913 (Left-Putamen)(lh.caudalmiddlefrontal\_3)(lh.superiorfrontal\_12)  
3244 0.8913 (Left-Putamen)(lh.insula\_2)(lh.precentral\_11)(lh.precentral\_9)  
3245 0.8913 (Left-Putamen)(lh.lateralorbitofrontal\_2)(lh.medialorbitofrontal\_5)  
3246 0.8913 (Left-Putamen)(lh.lateralorbitofrontal\_6)(lh.lateralorbitofrontal\_7)(lh.parstriangularis\_3)(lh.rostralmiddlefrontal\_9)  
3247 0.8913 (Left-Putamen)(lh.lateralorbitofrontal\_6)(lh.parstriangularis\_3)(lh.rostralmiddlefrontal\_1)(lh.rostralmiddlefrontal\_9)  
3248 0.8913 (Left-Putamen)(lh.parsopercularis\_3)(lh.parstriangularis\_3)(lh.rostralmiddlefrontal\_1)  
3249 0.8913 (Left-Putamen)(lh.rostralmiddlefrontal\_12)(lh.rostralmiddlefrontal\_9)(lh.superiorfrontal\_3)  
3250 0.8913 (Left-Putamen)(lh.supramarginal\_9)

3251 0.8913 (lh.caudalanteriorcingulate\_2)(lh.caudalmiddlefrontal\_1)(lh.caudalmiddlefrontal\_3)  
3252 0.8913 (lh.caudalmiddlefrontal\_3)(lh.rostralmiddlefrontal\_1)(lh.rostralmiddlefrontal\_3)(lh.rostralmiddlefrontal\_4)  
3253 0.8913 (lh.caudalmiddlefrontal\_4)(lh.superiorfrontal\_12)  
3254 0.8913 (lh.caudalmiddlefrontal\_5)(lh.precentral\_9)  
3255 0.8913 (lh.fusiform\_2)(lh.lateraloccipital\_10)(lh.lateraloccipital\_11)  
3256 0.8913 (lh.inferiorparietal\_9)(lh.superiortemporal\_2)  
3257 0.8913 (lh.inferiortemporal\_3)(lh.inferiortemporal\_6)(lh.middletemporal\_3)  
3258 0.8913 (lh.insula\_3)(lh.precentral\_12)  
3259 0.8913 (lh.isthmuscingulate\_2)(lh.isthmuscingulate\_3)(lh.precuneus\_6)  
3260 0.8913 (lh.isthmuscingulate\_2)(lh.precuneus\_10)(lh.precuneus\_11)  
3261 0.8913 (lh.isthmuscingulate\_2)(lh.precuneus\_10)(lh.precuneus\_6)  
3262 0.8913 (lh.lateraloccipital\_1)(lh.superiorparietal\_14)  
3263 0.8913 (lh.lateraloccipital\_11)(lh.lateraloccipital\_6)(lh.pericalcarine\_3)  
3264 0.8913 (lh.lateraloccipital\_2)(lh.lateraloccipital\_6)(lh.pericalcarine\_2)  
3265 0.8913 (lh.lateraloccipital\_8)(lh.lateraloccipital\_9)  
3266 0.8913 (lh.lateralorbitofrontal\_1)(lh.lateralorbitofrontal\_2)  
3267 0.8913 (lh.lateralorbitofrontal\_6)(lh.parstriangularis\_3)(lh.rostralmiddlefrontal\_1)(lh.rostralmiddlefrontal\_6)  
3268 0.8913 (lh.lateralorbitofrontal\_7)(lh.medialorbitofrontal\_3)  
3269 0.8913 (lh.medialorbitofrontal\_2)(lh.rostralanteriorcingulate\_1)(lh.rostralmiddlefrontal\_12)(lh.rostralmiddlefrontal\_9)(lh.superiorfrontal\_3)  
3270 0.8913 (lh.parsopercularis\_1)(lh.parsopercularis\_2)(lh.rostralmiddlefrontal\_1)  
3271 0.8913 (lh.pericalcarine\_1)(lh.pericalcarine\_2)(lh.pericalcarine\_3)  
3272 0.8913 (lh.precuneus\_3)(lh.precuneus\_6)(lh.superiorparietal\_5)(lh.superiorparietal\_6)  
3273 0.8913 (lh.precuneus\_4)(lh.precuneus\_6)  
3274 0.8913 (lh.rostralmiddlefrontal\_8)(lh.superiorfrontal\_2)(lh.superiorfrontal\_3)  
3275 0.8913 (lh.superiorfrontal\_4)(lh.superiorfrontal\_8)(lh.superiorfrontal\_9)  
3276 0.8913 (rh.caudalanteriorcingulate\_2)(rh.caudalmiddlefrontal\_4)  
3277 0.8913 (rh.caudalmiddlefrontal\_5)(rh.rostralmiddlefrontal\_2)  
3278 0.8913 (rh.fusiform\_4)(rh.inferiortemporal\_7)  
3279 0.8913 (rh.inferiorparietal\_1)(rh.inferiorparietal\_3)  
3280 0.8913 (rh.inferiorparietal\_1)(rh.superiorparietal\_1)(rh.supramarginal\_9)  
3281 0.8913 (rh.inferiortemporal\_5)(rh.inferiortemporal\_6)(rh.middletemporal\_2)  
3282 0.8913 (rh.inferiortemporal\_5)(rh.middletemporal\_4)  
3283 0.8913 (rh.insula\_3)(rh.precentral\_10)(rh.precentral\_7)  
3284 0.8913 (rh.lateraloccipital\_3)(rh.lateraloccipital\_4)(rh.lateraloccipital\_8)  
3285 0.8913 (rh.lingual\_4)(rh.lingual\_6)  
3286 0.8913 (rh.postcentral\_1)(rh.precentral\_4)  
3287 0.8913 (rh.precentral\_6)(rh.precentral\_7)  
3288 0.8913 (rh.rostralmiddlefrontal\_6)(rh.rostralmiddlefrontal\_7)  
3289 0.8913 (rh.superiorfrontal\_10)(rh.superiorfrontal\_11)(rh.superiorfrontal\_13)(rh.superiorfrontal\_9)  
3290 0.8913 (rh.superiorfrontal\_11)(rh.superiorfrontal\_15)  
3291 0.8913 (rh.superiorfrontal\_11)(rh.superiorfrontal\_5)(rh.superiorfrontal\_7)(rh.superiorfrontal\_8)(rh.superiorfrontal\_9)  
3292 0.8913 (rh.superiorfrontal\_11)(rh.superiorfrontal\_5)(rh.superiorfrontal\_7)(rh.superiorfrontal\_9)  
3293 0.8913 (rh.superiorfrontal\_13)(rh.superiorfrontal\_5)  
3294 0.8913 (rh.superiorfrontal\_2)(rh.superiorfrontal\_5)(rh.superiorfrontal\_6)(rh.superiorfrontal\_8)  
3295 0.8913 (rh.superiorfrontal\_3)(rh.superiorfrontal\_5)(rh.superiorfrontal\_6)  
3296 0.8913 (Right-Accumbens-area)(Right-Caudate)(Right-Hippocampus)(Right-Pallidum)(Right-Putamen)(Right-Thalamus-Proper)  
3297 0.8913 (Right-Accumbens-area)(Right-Caudate)(Right-Hippocampus)(Right-Pallidum)(Right-Putamen)  
3298 0.8913 (Right-Accumbens-area)(Right-Caudate)(Right-Hippocampus)(Right-Putamen)(Right-Thalamus-Proper)  
3299 0.8913 (Right-Accumbens-area)(Right-Caudate)(Right-Hippocampus)(Right-Putamen)  
3300 0.8913 (Right-Amygdala)(Right-Caudate)(Right-Hippocampus)(Right-Pallidum)(Right-Putamen)(Right-Thalamus-Proper)

3301 0.8913 (Right-Amygdala)(Right-Caudate)(Right-Hippocampus)(Right-Pallidum)(Right-Putamen)  
3302 0.8913 (Right-Amygdala)(Right-Caudate)(Right-Hippocampus)(Right-Pallidum)(Right-Thalamus-Proper)  
3303 0.8913 (Right-Amygdala)(Right-Caudate)(Right-Hippocampus)(Right-Pallidum)  
3304 0.8913 (Right-Amygdala)(Right-Caudate)(Right-Hippocampus)(Right-Putamen)(Right-Thalamus-Proper)  
3305 0.8913 (Right-Amygdala)(Right-Caudate)(Right-Hippocampus)(Right-Putamen)  
3306 0.8913 (Right-Amygdala)(Right-Caudate)(Right-Hippocampus)(Right-Thalamus-Proper)  
3307 0.8913 (Right-Amygdala)(Right-Caudate)(Right-Hippocampus)  
3308 0.8913 (Right-Caudate)(rh.caudalanteriorcingulate\_2)(rh.caudalmiddlefrontal\_4)  
3309 0.8913 (Right-Caudate)(rh.rostralmiddlefrontal\_12)  
3310 0.8913 (Right-Caudate)(rh.rostralmiddlefrontal\_8)(rh.superiorfrontal\_2)  
3311 0.8913 (Right-Caudate)(rh.superiorfrontal\_11)(rh.superiorfrontal\_5)  
3312 0.8913 (Right-Caudate)(rh.superiorfrontal\_5)(rh.superiorfrontal\_7)  
3313 0.8913 (Right-Caudate)(Right-Putamen)(rh.lateralorbitofrontal\_4)(rh.lateralorbitofrontal\_5)  
3314 0.8913 (Right-Caudate)(Right-Putamen)(rh.rostralmiddlefrontal\_12)  
3315 0.8913 (Right-Caudate)(Right-Thalamus-Proper)(rh.posteriorcingulate\_4)  
3316 0.8913 (Right-Putamen)(rh.lateralorbitofrontal\_2)(rh.lateralorbitofrontal\_6)(rh.lateralorbitofrontal\_7)(rh.parstriangularis\_1)  
3317 0.8913 (Right-Putamen)(rh.lateralorbitofrontal\_7)(rh.rostralmiddlefrontal\_12)(rh.rostralmiddlefrontal\_8)  
3318 0.8913 (Right-Putamen)(rh.medialorbitofrontal\_2)(rh.rostralmiddlefrontal\_11)  
3319 0.8913 (Right-Putamen)(rh.postcentral\_1)(rh.postcentral\_4)  
3320 0.8913 (Right-Putamen)(rh.precentral\_13)(rh.precentral\_15)  
3321 0.8913 (Right-Thalamus-Proper)(rh.posteriorcingulate\_4)  
3322 0.88889 (Left-Accumbens-area)(Left-Caudate)(Left-Putamen)(lh.medialorbitofrontal\_5)  
3323 0.88889 (Left-Caudate)(Left-Putamen)(lh.caudalanteriorcingulate\_1)(lh.caudalanteriorcingulate\_2)(lh.rostralanteriorcingulate\_1)  
3324 0.88889 (Left-Caudate)(Left-Putamen)(lh.caudalmiddlefrontal\_1)(lh.caudalmiddlefrontal\_3)(lh.caudalmiddlefrontal\_4)  
3325 0.88889 (Left-Caudate)(Left-Putamen)(lh.insula\_1)(lh.supramarginal\_1)  
3326 0.88889 (Left-Caudate)(Left-Putamen)(lh.lateralorbitofrontal\_7)(lh.medialorbitofrontal\_2)(lh.rostralanteriorcingulate\_1)  
3327 0.88889 (Left-Caudate)(Left-Putamen)(lh.postcentral\_8)(lh.precentral\_7)  
3328 0.88889 (Left-Caudate)(Left-Putamen)(lh.superiorfrontal\_10)  
3329 0.88889 (Left-Caudate)(lh.paracentral\_5)(lh.superiorfrontal\_12)(lh.superiorfrontal\_14)  
3330 0.88889 (Left-Caudate)(lh.rostralanteriorcingulate\_2)(lh.rostralmiddlefrontal\_4)(lh.superiorfrontal\_4)  
3331 0.88889 (Left-Hippocampus)(lh.fusiform\_5)(lh.lateraloccipital\_9)  
3332 0.88889 (Left-Hippocampus)(lh.isthmuscingulate\_2)(lh.isthmuscingulate\_3)(lh.precuneus\_11)  
3333 0.88889 (Left-Hippocampus)(lh.isthmuscingulate\_2)(lh.precuneus\_11)  
3334 0.88889 (Left-Pallidum)(Left-Putamen)(lh.insula\_1)(lh.precentral\_11)  
3335 0.88889 (Left-Pallidum)(lh.insula\_1)(lh.precentral\_11)  
3336 0.88889 (Left-Putamen)(lh.caudalanteriorcingulate\_1)(lh.caudalanteriorcingulate\_2)(lh.rostralanteriorcingulate\_1)  
3337 0.88889 (Left-Putamen)(lh.lateralorbitofrontal\_1)(lh.lateralorbitofrontal\_2)  
3338 0.88889 (Left-Putamen)(lh.rostralmiddlefrontal\_8)(lh.superiorfrontal\_4)  
3339 0.88889 (lh.caudalmiddlefrontal\_1)(lh.caudalmiddlefrontal\_3)(lh.rostralmiddlefrontal\_3)  
3340 0.88889 (lh.caudalmiddlefrontal\_3)(lh.parstriangularis\_3)(lh.rostralmiddlefrontal\_1)  
3341 0.88889 (lh.caudalmiddlefrontal\_3)(lh.superiorfrontal\_11)(lh.superiorfrontal\_12)  
3342 0.88889 (lh.fusiform\_3)(lh.fusiform\_4)  
3343 0.88889 (lh.inferiorparietal\_2)(lh.inferiorparietal\_8)  
3344 0.88889 (lh.inferiorparietal\_4)(lh.lateraloccipital\_7)  
3345 0.88889 (lh.insula\_6)(lh.parstriangularis\_3)(lh.rostralmiddlefrontal\_4)  
3346 0.88889 (lh.lateraloccipital\_10)(lh.lateraloccipital\_6)  
3347 0.88889 (lh.lateraloccipital\_6)(lh.lingual\_1)(lh.pericalcarine\_2)(lh.pericalcarine\_3)  
3348 0.88889 (lh.lateralorbitofrontal\_3)(lh.lateralorbitofrontal\_4)(lh.lateralorbitofrontal\_6)  
3349 0.88889 (lh.lateralorbitofrontal\_4)(lh.lateralorbitofrontal\_6)(lh.lateralorbitofrontal\_7)(lh.parstriangularis\_3)(lh.rostralmiddlefrontal\_12)  
3350 0.88889 (lh.lateralorbitofrontal\_4)(lh.lateralorbitofrontal\_7)(lh.parstriangularis\_3)(lh.rostralmiddlefrontal\_9)

3351 0.88889 (lh.lateralorbitofrontal\_7)(lh.rostralmiddlefrontal\_6)  
3352 0.88889 (lh.medialorbitofrontal\_1)(lh.medialorbitofrontal\_2)(lh.rostralmiddlefrontal\_12)  
3353 0.88889 (lh.medialorbitofrontal\_2)(lh.rostralmiddlefrontal\_11)  
3354 0.88889 (lh.precuneus\_3)(lh.superiorparietal\_8)  
3355 0.88889 (lh.precuneus\_6)(lh.superiorparietal\_11)(lh.superiorparietal\_5)  
3356 0.88889 (lh.rostralmiddlefrontal\_1)(lh.rostralmiddlefrontal\_12)  
3357 0.88889 (lh.rostralmiddlefrontal\_12)(lh.rostralmiddlefrontal\_9)(lh.superiorfrontal\_1)  
3358 0.88889 (lh.rostralmiddlefrontal\_12)(lh.superiorfrontal\_4)  
3359 0.88889 (lh.rostralmiddlefrontal\_4)(lh.superiorfrontal\_10)(lh.superiorfrontal\_11)(lh.superiorfrontal\_4)  
3360 0.88889 (lh.superiorfrontal\_11)(lh.superiorfrontal\_13)(lh.superiorfrontal\_14)(lh.superiorfrontal\_9)  
3361 0.88889 (lh.superiorfrontal\_4)(lh.superiorfrontal\_7)(lh.superiorfrontal\_8)(lh.superiorfrontal\_9)  
3362 0.88889 (rh.bankssts\_3)(rh.superiortemporal\_1)  
3363 0.88889 (rh.caudalmiddlefrontal\_2)(rh.caudalmiddlefrontal\_5)  
3364 0.88889 (rh.entorhinal\_1)(rh.parahippocampal\_3)  
3365 0.88889 (rh.fusiform\_1)(rh.fusiform\_3)(rh.lateraloccipital\_10)(rh.lateraloccipital\_8)  
3366 0.88889 (rh.fusiform\_1)(rh.fusiform\_3)(rh.lateraloccipital\_8)  
3367 0.88889 (rh.fusiform\_1)(rh.lateraloccipital\_4)(rh.lateraloccipital\_7)(rh.lingual\_2)  
3368 0.88889 (rh.fusiform\_1)(rh.lateraloccipital\_8)(rh.lingual\_5)(rh.lingual\_7)  
3369 0.88889 (rh.fusiform\_1)(rh.lingual\_4)(rh.lingual\_5)  
3370 0.88889 (rh.inferiortemporal\_2)(rh.inferiortemporal\_3)  
3371 0.88889 (rh.inferiortemporal\_5)(rh.inferiortemporal\_7)  
3372 0.88889 (rh.insula\_1)(rh.postcentral\_1)(rh.precentral\_7)  
3373 0.88889 (rh.lateraloccipital\_5)(rh.pericalcarine\_4)  
3374 0.88889 (rh.lateralorbitofrontal\_6)(rh.parsorbitalis\_2)(rh.rostralmiddlefrontal\_12)  
3375 0.88889 (rh.medialorbitofrontal\_2)(rh.superiorfrontal\_1)  
3376 0.88889 (rh.pericalcarine\_1)(rh.pericalcarine\_2)  
3377 0.88889 (rh.pericalcarine\_2)(rh.precuneus\_1)(rh.superiorparietal\_11)  
3378 0.88889 (rh.postcentral\_10)(rh.supramarginal\_1)  
3379 0.88889 (rh.rostralmiddlefrontal\_10)(rh.superiorfrontal\_1)  
3380 0.88889 (rh.rostralmiddlefrontal\_12)(rh.rostralmiddlefrontal\_5)(rh.rostralmiddlefrontal\_8)  
3381 0.88889 (rh.superiorfrontal\_2)(rh.superiorfrontal\_5)(rh.superiorfrontal\_7)(rh.superiorfrontal\_8)  
3382 0.88889 (rh.superiorfrontal\_2)(rh.superiorfrontal\_5)(rh.superiorfrontal\_9)  
3383 0.88889 (rh.superiorfrontal\_4)(rh.superiorfrontal\_6)(rh.superiorfrontal\_7)  
3384 0.88889 (rh.supramarginal\_1)(rh.supramarginal\_6)(rh.supramarginal\_8)  
3385 0.88889 (Right-Caudate)(rh.caudalmiddlefrontal\_1)(rh.caudalmiddlefrontal\_4)  
3386 0.88889 (Right-Caudate)(rh.lateralorbitofrontal\_5)(rh.medialorbitofrontal\_2)  
3387 0.88889 (Right-Caudate)(rh.medialorbitofrontal\_2)(rh.superiorfrontal\_2)  
3388 0.88889 (Right-Caudate)(rh.supramarginal\_8)  
3389 0.88889 (Right-Caudate)(Right-Putamen)(rh.caudalanteriorcingulate\_2)  
3390 0.88889 (Right-Caudate)(Right-Putamen)(rh.posteriorcingulate\_1)(rh.posteriorcingulate\_2)  
3391 0.88889 (Right-Caudate)(Right-Putamen)(rh.precentral\_11)(rh.precentral\_7)  
3392 0.88889 (Right-Caudate)(Right-Putamen)(rh.rostralmiddlefrontal\_3)  
3393 0.88889 (Right-Hippocampus)(rh.supramarginal\_8)(rh.supramarginal\_9)  
3394 0.88889 (Right-Putamen)(rh.caudalanteriorcingulate\_2)  
3395 0.88889 (Right-Putamen)(rh.lateralorbitofrontal\_2)(rh.parstriangularis\_1)(rh.rostralmiddlefrontal\_8)  
3396 0.88889 (Right-Putamen)(rh.posteriorcingulate\_1)(rh.posteriorcingulate\_2)  
3397 0.88889 (Right-Putamen)(Right-Thalamus-Proper)(rh.precentral\_11)(rh.precentral\_13)  
3398 0.88647 (Left-Accumbens-area)(Left-Hippocampus)(Left-Thalamus-Proper)  
3399 0.88647 (Left-Accumbens-area)(Left-Hippocampus)  
3400 0.88647 (Left-Caudate)(Left-Putamen)(lh.caudalanteriorcingulate\_2)(lh.superiorfrontal\_11)(lh.superiorfrontal\_12)

3401 0.88647 (Left-Caudate)(Left-Putamen)(lh.caudalmiddlefrontal\_3)(lh.superiorfrontal\_12)  
3402 0.88647 (Left-Caudate)(Left-Putamen)(lh.insula\_6)(lh.parsopercularis\_3)(lh.rostralmiddlefrontal\_1)  
3403 0.88647 (Left-Caudate)(Left-Putamen)(lh.insula\_6)(lh.rostralmiddlefrontal\_9)  
3404 0.88647 (Left-Caudate)(Left-Putamen)(lh.lateralorbitofrontal\_2)(lh.medialorbitofrontal\_2)  
3405 0.88647 (Left-Caudate)(Left-Putamen)(lh.rostralanteriorcingulate\_1)(lh.rostralanteriorcingulate\_2)(lh.rostralmiddlefrontal\_9)  
3406 0.88647 (Left-Caudate)(Left-Putamen)(lh.rostralmiddlefrontal\_4)(lh.superiorfrontal\_11)  
3407 0.88647 (Left-Caudate)(Left-Thalamus-Proper)(lh.precentral\_11)(lh.precentral\_4)(lh.precentral\_7)  
3408 0.88647 (Left-Caudate)(lh.caudalanteriorcingulate\_2)(lh.caudalmiddlefrontal\_1)(lh.caudalmiddlefrontal\_3)  
3409 0.88647 (Left-Caudate)(lh.caudalanteriorcingulate\_2)(lh.superiorfrontal\_11)(lh.superiorfrontal\_14)(lh.superiorfrontal\_8)  
3410 0.88647 (Left-Caudate)(lh.insula\_1)(lh.precentral\_7)  
3411 0.88647 (Left-Caudate)(lh.lateralorbitofrontal\_3)  
3412 0.88647 (Left-Caudate)(lh.lateralorbitofrontal\_6)(lh.lateralorbitofrontal\_7)  
3413 0.88647 (Left-Caudate)(lh.postcentral\_8)(lh.precentral\_11)  
3414 0.88647 (Left-Caudate)(lh.precentral\_6)  
3415 0.88647 (Left-Hippocampus)(Left-Thalamus-Proper)(lh.superiortemporal\_2)  
3416 0.88647 (Left-Hippocampus)(lh.lateraloccipital\_9)(lh.lingual\_8)  
3417 0.88647 (Left-Putamen)(lh.lateralorbitofrontal\_2)(lh.lateralorbitofrontal\_7)(lh.medialorbitofrontal\_2)  
3418 0.88647 (Left-Putamen)(lh.lateralorbitofrontal\_4)(lh.lateralorbitofrontal\_6)(lh.lateralorbitofrontal\_7)(lh.rostralmiddlefrontal\_9)  
3419 0.88647 (Left-Putamen)(lh.lateralorbitofrontal\_7)(lh.medialorbitofrontal\_2)(lh.rostralanteriorcingulate\_1)(lh.rostralmiddlefrontal\_12)  
3420 0.88647 (Left-Putamen)(lh.precentral\_11)(lh.precentral\_7)(lh.precentral\_9)  
3421 0.88647 (Left-Thalamus-Proper)(lh.insula\_1)(lh.postcentral\_8)  
3422 0.88647 (Left-Thalamus-Proper)(lh.superiortemporal\_2)  
3423 0.88647 (lh.bankssts\_2)(lh.fusiform\_4)  
3424 0.88647 (lh.bankssts\_2)(lh.inferiortemporal\_3)  
3425 0.88647 (lh.bankssts\_3)(lh.fusiform\_7)  
3426 0.88647 (lh.fusiform\_1)(lh.pericalcarine\_3)  
3427 0.88647 (lh.fusiform\_2)(lh.lingual\_1)(lh.lingual\_8)  
3428 0.88647 (lh.fusiform\_4)(lh.inferiortemporal\_7)  
3429 0.88647 (lh.fusiform\_4)(lh.lateraloccipital\_9)  
3430 0.88647 (lh.fusiform\_7)(lh.fusiform\_8)  
3431 0.88647 (lh.inferiorparietal\_9)(lh.superiorparietal\_5)  
3432 0.88647 (lh.inferiortemporal\_7)(lh.middletemporal\_3)  
3433 0.88647 (lh.insula\_1)(lh.supramarginal\_2)(lh.supramarginal\_4)  
3434 0.88647 (lh.insula\_6)(lh.parstriangularis\_3)(lh.rostralmiddlefrontal\_1)(lh.rostralmiddlefrontal\_9)  
3435 0.88647 (lh.isthmuscingulate\_2)(lh.posteriorcingulate\_4)  
3436 0.88647 (lh.lateraloccipital\_5)(lh.pericalcarine\_2)  
3437 0.88647 (lh.lateralorbitofrontal\_6)(lh.parstriangularis\_3)(lh.rostralmiddlefrontal\_1)(lh.rostralmiddlefrontal\_6)(lh.rostralmiddlefrontal\_9)  
3438 0.88647 (lh.lateralorbitofrontal\_7)(lh.medialorbitofrontal\_2)(lh.rostralanteriorcingulate\_1)(lh.rostralmiddlefrontal\_9)  
3439 0.88647 (lh.paracentral\_5)(lh.precentral\_4)(lh.superiorfrontal\_14)  
3440 0.88647 (lh.pericalcarine\_1)(lh.pericalcarine\_3)(lh.superiorparietal\_12)  
3441 0.88647 (lh.postcentral\_8)(lh.precentral\_9)  
3442 0.88647 (lh.rostralanteriorcingulate\_1)(lh.rostralanteriorcingulate\_2)(lh.rostralmiddlefrontal\_4)  
3443 0.88647 (lh.rostralmiddlefrontal\_1)(lh.rostralmiddlefrontal\_12)(lh.rostralmiddlefrontal\_9)  
3444 0.88647 (lh.rostralmiddlefrontal\_8)(lh.rostralmiddlefrontal\_9)(lh.superiorfrontal\_3)(lh.superiorfrontal\_4)  
3445 0.88647 (lh.superiorfrontal\_10)(lh.superiorfrontal\_11)(lh.superiorfrontal\_8)(lh.superiorfrontal\_9)  
3446 0.88647 (lh.superiorfrontal\_11)(lh.superiorfrontal\_14)(lh.superiorfrontal\_7)(lh.superiorfrontal\_9)  
3447 0.88647 (rh.caudalmiddlefrontal\_4)(rh.caudalmiddlefrontal\_5)(rh.superiorfrontal\_7)  
3448 0.88647 (rh.caudalmiddlefrontal\_4)(rh.superiorfrontal\_13)(rh.superiorfrontal\_7)  
3449 0.88647 (rh.fusiform\_2)(rh.lateraloccipital\_10)(rh.lingual\_7)  
3450 0.88647 (rh.fusiform\_7)(rh.parahippocampal\_2)

3451 0.88647 (rh.inferiorparietal\_11)(rh.lateraloccipital\_4)  
3452 0.88647 (rh.inferiorparietal\_4)(rh.supramarginal\_3)  
3453 0.88647 (rh.insula\_1)(rh.precentral\_11)(rh.supramarginal\_1)  
3454 0.88647 (rh.insula\_2)(rh.insula\_3)(rh.supramarginal\_9)  
3455 0.88647 (rh.isthmuscingulate\_2)(rh.precuneus\_2)(rh.precuneus\_7)  
3456 0.88647 (rh.lateraloccipital\_10)(rh.lateraloccipital\_8)(rh.lingual\_5)  
3457 0.88647 (rh.lateralorbitofrontal\_2)(rh.rostralmiddlefrontal\_12)(rh.rostralmiddlefrontal\_8)  
3458 0.88647 (rh.lateralorbitofrontal\_6)(rh.medialorbitofrontal\_2)(rh.rostralmiddlefrontal\_13)  
3459 0.88647 (rh.lateralorbitofrontal\_6)(rh.parsorbitalis\_1)(rh.parstriangularis\_1)  
3460 0.88647 (rh.paracentral\_6)(rh.superiorparietal\_1)  
3461 0.88647 (rh.precentral\_13)(rh.precentral\_14)(rh.precentral\_15)  
3462 0.88647 (rh.precuneus\_10)(rh.superiorparietal\_1)(rh.superiorparietal\_2)  
3463 0.88647 (rh.rostralmiddlefrontal\_10)(rh.rostralmiddlefrontal\_11)  
3464 0.88647 (rh.superiorfrontal\_11)(rh.superiorfrontal\_13)(rh.superiorfrontal\_16)  
3465 0.88647 (rh.superiorfrontal\_13)(rh.superiorfrontal\_15)  
3466 0.88647 (Right-Amygdala)(Right-Hippocampus)(rh.insula\_4)  
3467 0.88647 (Right-Amygdala)(Right-Hippocampus)(Right-Putamen)(rh.insula\_4)  
3468 0.88647 (Right-Caudate)(rh.caudalmiddlefrontal\_4)(rh.rostralmiddlefrontal\_1)  
3469 0.88647 (Right-Caudate)(rh.caudalmiddlefrontal\_4)(rh.rostralmiddlefrontal\_3)  
3470 0.88647 (Right-Caudate)(Right-Putamen)(rh.lateralorbitofrontal\_5)(rh.lateralorbitofrontal\_7)  
3471 0.88647 (Right-Caudate)(Right-Putamen)(rh.precentral\_11)(rh.precentral\_13)(rh.precentral\_7)  
3472 0.88647 (Right-Hippocampus)(rh.insula\_1)  
3473 0.88647 (Right-Hippocampus)(rh.lateraloccipital\_10)  
3474 0.88647 (Right-Hippocampus)(Right-Putamen)(rh.insula\_1)  
3475 0.88647 (Right-Putamen)(rh.insula\_1)(rh.supramarginal\_8)(rh.supramarginal\_9)  
3476 0.88647 (Right-Putamen)(rh.insula\_1)(rh.supramarginal\_8)  
3477 0.88647 (Right-Putamen)(rh.insula\_2)(rh.insula\_3)(rh.supramarginal\_9)  
3478 0.88406 (Left-Accumbens-area)(Left-Amygdala)(Left-Pallidum)(Left-Putamen)(Left-Thalamus-Proper)  
3479 0.88406 (Left-Accumbens-area)(Left-Amygdala)(Left-Pallidum)(Left-Putamen)  
3480 0.88406 (Left-Accumbens-area)(Left-Amygdala)(Left-Putamen)(Left-Thalamus-Proper)  
3481 0.88406 (Left-Accumbens-area)(Left-Amygdala)(Left-Putamen)  
3482 0.88406 (Left-Accumbens-area)(Left-Caudate)(lh.medialorbitofrontal\_4)  
3483 0.88406 (Left-Caudate)(Left-Putamen)(Left-Thalamus-Proper)(lh.precentral\_11)(lh.precentral\_4)(lh.precentral\_7)  
3484 0.88406 (Left-Caudate)(Left-Putamen)(lh.caudalmiddlefrontal\_3)(lh.rostralmiddlefrontal\_1)(lh.rostralmiddlefrontal\_4)  
3485 0.88406 (Left-Caudate)(Left-Putamen)(lh.insula\_1)(lh.precentral\_7)  
3486 0.88406 (Left-Caudate)(Left-Putamen)(lh.insula\_6)(lh.parstriangularis\_3)(lh.rostralmiddlefrontal\_1)  
3487 0.88406 (Left-Caudate)(Left-Putamen)(lh.parstriangularis\_3)(lh.rostralmiddlefrontal\_4)(lh.rostralmiddlefrontal\_9)  
3488 0.88406 (Left-Caudate)(Left-Putamen)(lh.postcentral\_8)(lh.precentral\_11)  
3489 0.88406 (Left-Caudate)(Left-Putamen)(lh.rostralanteriorcingulate\_1)(lh.rostralmiddlefrontal\_4)(lh.rostralmiddlefrontal\_9)  
3490 0.88406 (Left-Caudate)(Left-Putamen)(lh.superiorfrontal\_12)(lh.superiorfrontal\_14)  
3491 0.88406 (Left-Caudate)(Left-Thalamus-Proper)(lh.paracentral\_5)(lh.precentral\_4)  
3492 0.88406 (Left-Caudate)(lh.caudalanteriorcingulate\_2)(lh.caudalmiddlefrontal\_5)  
3493 0.88406 (Left-Caudate)(lh.medialorbitofrontal\_2)(lh.rostralanteriorcingulate\_1)(lh.superiorfrontal\_4)  
3494 0.88406 (Left-Caudate)(lh.rostralmiddlefrontal\_4)(lh.superiorfrontal\_11)(lh.superiorfrontal\_4)  
3495 0.88406 (Left-Hippocampus)(lh.inferiorparietal\_4)  
3496 0.88406 (Left-Putamen)(Left-Thalamus-Proper)(lh.insula\_1)(lh.postcentral\_8)  
3497 0.88406 (Left-Putamen)(lh.caudalmiddlefrontal\_3)(lh.parstriangularis\_3)  
3498 0.88406 (Left-Putamen)(lh.lateralorbitofrontal\_3)(lh.lateralorbitofrontal\_4)(lh.lateralorbitofrontal\_6)  
3499 0.88406 (Left-Putamen)(lh.medialorbitofrontal\_2)(lh.rostralmiddlefrontal\_12)(lh.superiorfrontal\_3)  
3500 0.88406 (Left-Putamen)(lh.medialorbitofrontal\_2)(lh.rostralmiddlefrontal\_9)(lh.superiorfrontal\_3)

3501 0.88406 (Left-Putamen)(lh.superiorfrontal\_3)(lh.superiorfrontal\_4)  
3502 0.88406 (lh.caudalanteriorcingulate\_1)(lh.rostralmiddlefrontal\_4)  
3503 0.88406 (lh.entorhinal\_1)(lh.parahippocampal\_1)  
3504 0.88406 (lh.fusiform\_2)(lh.lateraloccipital\_10)(lh.lateraloccipital\_6)  
3505 0.88406 (lh.fusiform\_2)(lh.lateraloccipital\_6)(lh.lateraloccipital\_9)  
3506 0.88406 (lh.fusiform\_7)(lh.middletemporal\_3)  
3507 0.88406 (lh.inferiorparietal\_1)(lh.pericalcarine\_3)(lh.precuneus\_11)  
3508 0.88406 (lh.inferiorparietal\_8)(lh.superiorparietal\_5)  
3509 0.88406 (lh.insula\_1)(lh.supramarginal\_6)  
3510 0.88406 (lh.insula\_2)(lh.superiortemporal\_2)  
3511 0.88406 (lh.insula\_6)(lh.lateralorbitofrontal\_6)  
3512 0.88406 (lh.isthmuscingulate\_2)(lh.isthmuscingulate\_3)(lh.precuneus\_10)(lh.precuneus\_11)  
3513 0.88406 (lh.lateraloccipital\_1)(lh.lateraloccipital\_2)(lh.pericalcarine\_1)  
3514 0.88406 (lh.lateraloccipital\_3)(lh.lateraloccipital\_5)  
3515 0.88406 (lh.lateraloccipital\_3)(lh.lateraloccipital\_6)(lh.lingual\_1)  
3516 0.88406 (lh.lateraloccipital\_3)(lh.lateraloccipital\_6)(lh.pericalcarine\_2)  
3517 0.88406 (lh.lateralorbitofrontal\_6)(lh.lateralorbitofrontal\_7)(lh.rostralmiddlefrontal\_6)  
3518 0.88406 (lh.lateralorbitofrontal\_6)(lh.parsorbitalis\_1)(lh.parstriangularis\_1)(lh.parstriangularis\_3)  
3519 0.88406 (lh.lateralorbitofrontal\_7)(lh.medialorbitofrontal\_5)  
3520 0.88406 (lh.lateralorbitofrontal\_7)(lh.parstriangularis\_3)(lh.rostralanteriorcingulate\_1)(lh.rostralmiddlefrontal\_12)  
3521 0.88406 (lh.lateralorbitofrontal\_7)(lh.rostralanteriorcingulate\_1)(lh.rostralmiddlefrontal\_12)(lh.rostralmiddlefrontal\_9)  
3522 0.88406 (lh.medialorbitofrontal\_2)(lh.parstriangularis\_3)(lh.rostralmiddlefrontal\_9)  
3523 0.88406 (lh.medialorbitofrontal\_2)(lh.rostralanteriorcingulate\_1)(lh.superiorfrontal\_3)(lh.superiorfrontal\_4)  
3524 0.88406 (lh.medialorbitofrontal\_2)(lh.rostralmiddlefrontal\_9)(lh.superiorfrontal\_4)  
3525 0.88406 (lh.paracentral\_5)(lh.posteriorcingulate\_3)  
3526 0.88406 (lh.parsopercularis\_1)(lh.parsopercularis\_2)(lh.parstriangularis\_3)(lh.rostralmiddlefrontal\_1)  
3527 0.88406 (lh.postcentral\_3)(lh.superiorparietal\_3)  
3528 0.88406 (lh.postcentral\_8)(lh.precentral\_6)  
3529 0.88406 (lh.precentral\_11)(lh.precentral\_6)  
3530 0.88406 (lh.precuneus\_9)(lh.superiorparietal\_11)(lh.superiorparietal\_6)  
3531 0.88406 (lh.rostralmiddlefrontal\_8)(lh.superiorfrontal\_2)(lh.superiorfrontal\_3)(lh.superiorfrontal\_4)  
3532 0.88406 (lh.rostralmiddlefrontal\_9)(lh.superiorfrontal\_2)(lh.superiorfrontal\_3)  
3533 0.88406 (lh.superiorfrontal\_11)(lh.superiorfrontal\_13)(lh.superiorfrontal\_8)  
3534 0.88406 (lh.superiorfrontal\_12)(lh.superiorfrontal\_17)  
3535 0.88406 (lh.superiorfrontal\_12)(lh.superiorfrontal\_4)  
3536 0.88406 (lh.superiorfrontal\_3)(lh.superiorfrontal\_5)(lh.superiorfrontal\_6)  
3537 0.88406 (rh.caudalmiddlefrontal\_3)(rh.precentral\_10)  
3538 0.88406 (rh.fusiform\_1)(rh.fusiform\_2)(rh.lingual\_5)(rh.lingual\_7)  
3539 0.88406 (rh.fusiform\_2)(rh.lateraloccipital\_8)(rh.lingual\_5)  
3540 0.88406 (rh.fusiform\_7)(rh.inferiortemporal\_2)  
3541 0.88406 (rh.fusiform\_8)(rh.middletemporal\_9)  
3542 0.88406 (rh.inferiorparietal\_12)(rh.inferiorparietal\_7)(rh.inferiorparietal\_8)  
3543 0.88406 (rh.inferiortemporal\_2)(rh.middletemporal\_5)(rh.middletemporal\_7)  
3544 0.88406 (rh.inferiortemporal\_2)(rh.superiortemporal\_7)  
3545 0.88406 (rh.insula\_1)(rh.superiorparietal\_1)(rh.supramarginal\_8)  
3546 0.88406 (rh.lateraloccipital\_8)(rh.lingual\_4)  
3547 0.88406 (rh.lateralorbitofrontal\_7)(rh.medialorbitofrontal\_2)(rh.rostralmiddlefrontal\_11)(rh.superiorfrontal\_2)  
3548 0.88406 (rh.middletemporal\_4)(rh.superiortemporal\_6)  
3549 0.88406 (rh.paracentral\_6)(rh.precentral\_13)(rh.precentral\_15)  
3550 0.88406 (rh.parsopercularis\_4)(rh.parstriangularis\_1)(rh.rostralmiddlefrontal\_3)

3551 0.88406 (rh.parstriangularis\_1)(rh.parstriangularis\_4)(rh.rostralmiddlefrontal\_3)(rh.rostralmiddlefrontal\_8)  
3552 0.88406 (rh.postcentral\_8)(rh.postcentral\_9)  
3553 0.88406 (rh.precentral\_10)(rh.precentral\_13)(rh.precentral\_8)  
3554 0.88406 (rh.precuneus\_10)(rh.precuneus\_7)(rh.superiorparietal\_1)  
3555 0.88406 (rh.precuneus\_4)(rh.precuneus\_7)(rh.superiorparietal\_10)(rh.superiorparietal\_7)  
3556 0.88406 (rh.precuneus\_4)(rh.precuneus\_8)  
3557 0.88406 (rh.precuneus\_4)(rh.superiorparietal\_1)(rh.superiorparietal\_10)  
3558 0.88406 (rh.rostralmiddlefrontal\_10)(rh.superiorfrontal\_1)(rh.superiorfrontal\_2)  
3559 0.88406 (rh.rostralmiddlefrontal\_11)(rh.rostralmiddlefrontal\_12)(rh.superiorfrontal\_2)  
3560 0.88406 (rh.rostralmiddlefrontal\_2)(rh.rostralmiddlefrontal\_5)  
3561 0.88406 (rh.rostralmiddlefrontal\_8)(rh.superiorfrontal\_7)  
3562 0.88406 (rh.rostralmiddlefrontal\_9)(rh.superiorfrontal\_5)(rh.superiorfrontal\_7)  
3563 0.88406 (rh.superiorfrontal\_4)(rh.superiorfrontal\_5)(rh.superiorfrontal\_6)(rh.superiorfrontal\_7)  
3564 0.88406 (rh.superiorparietal\_1)(rh.superiorparietal\_8)  
3565 0.88406 (Right-Amygdala)(rh.insula\_2)  
3566 0.88406 (Right-Amygdala)(Right-Putamen)(rh.insula\_2)  
3567 0.88406 (Right-Amygdala)(Right-Putamen)(Right-Thalamus-Proper)(rh.insula\_2)  
3568 0.88406 (Right-Amygdala)(Right-Thalamus-Proper)(rh.insula\_2)  
3569 0.88406 (Right-Caudate)(rh.lateralorbitofrontal\_4)(rh.lateralorbitofrontal\_7)  
3570 0.88406 (Right-Caudate)(rh.precentral\_5)(rh.precentral\_7)  
3571 0.88406 (Right-Caudate)(rh.superiorfrontal\_2)(rh.superiorfrontal\_5)  
3572 0.88406 (Right-Caudate)(Right-Putamen)(rh.lateralorbitofrontal\_4)(rh.lateralorbitofrontal\_7)  
3573 0.88406 (Right-Caudate)(Right-Putamen)(rh.rostralanterioringulate\_1)(rh.rostralanterioringulate\_2)  
3574 0.88406 (Right-Hippocampus)(rh.inferiorparietal\_9)  
3575 0.88406 (Right-Hippocampus)(rh.isthmuscingulate\_1)(rh.isthmuscingulate\_2)  
3576 0.88406 (Right-Hippocampus)(rh.isthmuscingulate\_2)(rh.lingual\_7)(rh.precuneus\_2)  
3577 0.88406 (Right-Hippocampus)(rh.parahippocampal\_2)(rh.parahippocampal\_3)  
3578 0.88406 (Right-Putamen)(rh.caudalmiddlefrontal\_2)  
3579 0.88406 (Right-Putamen)(rh.caudalmiddlefrontal\_4)(rh.parsopercularis\_4)(rh.rostralmiddlefrontal\_3)  
3580 0.88406 (Right-Putamen)(rh.insula\_3)(rh.precentral\_10)(rh.precentral\_7)  
3581 0.88406 (Right-Putamen)(rh.rostralanterioringulate\_1)(rh.rostralanterioringulate\_2)  
3582 0.88164 (Left-Amygdala)(Left-Hippocampus)(lh.inferiortemporal\_1)  
3583 0.88164 (Left-Caudate)(Left-Putamen)(lh.lateralorbitofrontal\_4)(lh.lateralorbitofrontal\_7)  
3584 0.88164 (Left-Caudate)(Left-Putamen)(lh.parsopercularis\_3)(lh.parstriangularis\_3)  
3585 0.88164 (Left-Caudate)(Left-Putamen)(lh.parstriangularis\_3)(lh.rostralmiddlefrontal\_1)(lh.rostralmiddlefrontal\_4)  
3586 0.88164 (Left-Caudate)(Left-Thalamus-Proper)(Right-Thalamus-Proper)  
3587 0.88164 (Left-Caudate)(lh.caudalanterioringulate\_2)(lh.superiorfrontal\_11)(lh.superiorfrontal\_4)  
3588 0.88164 (Left-Caudate)(lh.caudalmiddlefrontal\_1)(lh.caudalmiddlefrontal\_4)(lh.caudalmiddlefrontal\_5)  
3589 0.88164 (Left-Caudate)(lh.lateralorbitofrontal\_4)(lh.lateralorbitofrontal\_7)  
3590 0.88164 (Left-Caudate)(lh.lateralorbitofrontal\_7)(lh.rostralanterioringulate\_1)(lh.rostralmiddlefrontal\_9)  
3591 0.88164 (Left-Caudate)(lh.lateralorbitofrontal\_7)(lh.rostralmiddlefrontal\_12)(lh.rostralmiddlefrontal\_9)  
3592 0.88164 (Left-Caudate)(Right-Caudate)(lh.caudalanterioringulate\_1)(lh.caudalanterioringulate\_2)  
3593 0.88164 (Left-Caudate)(Right-Caudate)(lh.caudalanterioringulate\_1)(lh.rostralanterioringulate\_1)  
3594 0.88164 (Left-Caudate)(Right-Caudate)(Right-Thalamus-Proper)  
3595 0.88164 (Left-Caudate)(Right-Thalamus-Proper)  
3596 0.88164 (Left-Putamen)(lh.caudalanterioringulate\_1)(lh.caudalanterioringulate\_2)(lh.rostralanterioringulate\_1)(lh.rostralanterioringulate\_2)  
3597 0.88164 (Left-Putamen)(lh.lateralorbitofrontal\_4)(lh.lateralorbitofrontal\_6)(lh.parsopercularis\_3)(lh.rostralmiddlefrontal\_12)(lh.rostralmiddlefrontal\_9)  
3598 0.88164 (Left-Putamen)(lh.lateralorbitofrontal\_4)(lh.lateralorbitofrontal\_7)(lh.parsopercularis\_3)(lh.rostralmiddlefrontal\_12)  
3599 0.88164 (Left-Putamen)(lh.lateralorbitofrontal\_7)(lh.parsopercularis\_3)(lh.rostralanterioringulate\_1)  
3600 0.88164 (Left-Putamen)(lh.precentral\_13)



3601 0.88164 (Left-Putamen)(lh.precentral\_6)  
3602 0.88164 (Left-Putamen)(lh.rostralanteriorcingulate\_1)(lh.rostralmiddlefrontal\_9)(lh.superiorfrontal\_3)  
3603 0.88164 (Left-Putamen)(lh.rostralanteriorcingulate\_1)(lh.rostralmiddlefrontal\_9)(lh.superiorfrontal\_4)  
3604 0.88164 (lh.caudalmiddlefrontal\_1)(lh.rostralmiddlefrontal\_1)  
3605 0.88164 (lh.caudalmiddlefrontal\_2)(lh.caudalmiddlefrontal\_5)  
3606 0.88164 (lh.caudalmiddlefrontal\_5)(lh.superiorfrontal\_12)  
3607 0.88164 (lh.fusiform\_1)(lh.lingual\_6)  
3608 0.88164 (lh.fusiform\_2)(lh.lateraloccipital\_6)(lh.lingual\_4)  
3609 0.88164 (lh.fusiform\_7)(lh.inferiortemporal\_2)  
3610 0.88164 (lh.inferiorparietal\_1)(lh.inferiorparietal\_6)  
3611 0.88164 (lh.inferiorparietal\_8)(lh.precuneus\_9)  
3612 0.88164 (lh.inferiortemporal\_1)(lh.insula\_4)  
3613 0.88164 (lh.inferiortemporal\_6)(lh.inferiortemporal\_7)(lh.inferiortemporal\_8)  
3614 0.88164 (lh.insula\_1)(lh.postcentral\_8)(lh.precentral\_11)  
3615 0.88164 (lh.isthmuscingulate\_1)(lh.isthmuscingulate\_2)  
3616 0.88164 (lh.isthmuscingulate\_3)(lh.lingual\_7)  
3617 0.88164 (lh.isthmuscingulate\_3)(lh.precuneus\_10)(lh.precuneus\_11)(lh.precuneus\_6)  
3618 0.88164 (lh.lateralorbitofrontal\_4)(lh.lateralorbitofrontal\_7)(lh.rostralmiddlefrontal\_12)(lh.rostralmiddlefrontal\_9)  
3619 0.88164 (lh.lingual\_1)(lh.lingual\_4)(lh.lingual\_8)  
3620 0.88164 (lh.medialorbitofrontal\_3)(lh.medialorbitofrontal\_4)  
3621 0.88164 (lh.paracentral\_1)(lh.precentral\_2)(lh.precentral\_3)  
3622 0.88164 (lh.parsopercularis\_1)(lh.parsopercularis\_2)(lh.parsopercularis\_3)  
3623 0.88164 (lh.parstriangularis\_3)(lh.rostralmiddlefrontal\_1)(lh.rostralmiddlefrontal\_12)  
3624 0.88164 (lh.rostralanteriorcingulate\_2)(lh.rostralmiddlefrontal\_4)(lh.rostralmiddlefrontal\_9)  
3625 0.88164 (lh.rostralmiddlefrontal\_12)(lh.superiorfrontal\_3)(lh.superiorfrontal\_4)  
3626 0.88164 (lh.superiorfrontal\_10)(lh.superiorfrontal\_11)(lh.superiorfrontal\_14)(lh.superiorfrontal\_8)  
3627 0.88164 (lh.superiorfrontal\_10)(lh.superiorfrontal\_11)(lh.superiorfrontal\_14)  
3628 0.88164 (lh.superiorfrontal\_10)(lh.superiorfrontal\_11)(lh.superiorfrontal\_6)  
3629 0.88164 (lh.superiorfrontal\_10)(lh.superiorfrontal\_4)(lh.superiorfrontal\_5)(lh.superiorfrontal\_7)  
3630 0.88164 (lh.superiorfrontal\_10)(lh.superiorfrontal\_5)(lh.superiorfrontal\_7)  
3631 0.88164 (lh.superiorfrontal\_11)(lh.superiorfrontal\_4)(lh.superiorfrontal\_7)(lh.superiorfrontal\_9)  
3632 0.88164 (lh.superiorfrontal\_12)(lh.superiorfrontal\_14)(lh.superiorfrontal\_17)  
3633 0.88164 (lh.superiorfrontal\_3)(lh.superiorfrontal\_4)(lh.superiorfrontal\_5)(lh.superiorfrontal\_6)  
3634 0.88164 (lh.superiorparietal\_3)(lh.supramarginal\_1)  
3635 0.88164 (lh.superiortemporal\_4)(lh.superiortemporal\_6)  
3636 0.88164 (lh.superiortemporal\_6)(lh.superiortemporal\_7)  
3637 0.88164 (lh.superiortemporal\_8)(lh.superiortemporal\_9)  
3638 0.88164 (rh.bankssts\_1)(rh.inferiortemporal\_5)(rh.inferiortemporal\_6)  
3639 0.88164 (rh.bankssts\_2)(rh.inferiortemporal\_6)  
3640 0.88164 (rh.caudalmiddlefrontal\_4)(rh.caudalmiddlefrontal\_5)(rh.rostralmiddlefrontal\_2)  
3641 0.88164 (rh.caudalmiddlefrontal\_4)(rh.precentral\_13)  
3642 0.88164 (rh.caudalmiddlefrontal\_4)(rh.rostralmiddlefrontal\_1)(rh.superiorfrontal\_7)  
3643 0.88164 (rh.cuneus\_3)(rh.pericalcarine\_2)(rh.superiorparietal\_13)  
3644 0.88164 (rh.fusiform\_1)(rh.lateraloccipital\_10)(rh.lateraloccipital\_8)(rh.lingual\_5)  
3645 0.88164 (rh.fusiform\_3)(rh.fusiform\_4)(rh.fusiform\_6)  
3646 0.88164 (rh.fusiform\_3)(rh.inferiortemporal\_6)  
3647 0.88164 (rh.inferiorparietal\_1)(rh.inferiorparietal\_3)(rh.inferiorparietal\_4)  
3648 0.88164 (rh.inferiorparietal\_10)(rh.lateraloccipital\_8)(rh.lingual\_7)  
3649 0.88164 (rh.inferiortemporal\_2)(rh.inferiortemporal\_4)(rh.middletemporal\_4)  
3650 0.88164 (rh.inferiortemporal\_2)(rh.superiortemporal\_3)

3651 0.88164 (rh.insula\_1)(rh.postcentral\_1)(rh.supramarginal\_9)  
3652 0.88164 (rh.insula\_1)(rh.supramarginal\_7)  
3653 0.88164 (rh.insula\_6)(rh.lateralorbitofrontal\_6)  
3654 0.88164 (rh.lateraloccipital\_8)(rh.superiorparietal\_11)  
3655 0.88164 (rh.lateralorbitofrontal\_2)(rh.lateralorbitofrontal\_7)(rh.parstriangularis\_1)(rh.rostralmiddlefrontal\_12)  
3656 0.88164 (rh.middletemporal\_4)(rh.middletemporal\_6)(rh.middletemporal\_7)  
3657 0.88164 (rh.parsopercularis\_2)(rh.rostralmiddlefrontal\_3)  
3658 0.88164 (rh.parsopercularis\_4)(rh.parstriangularis\_1)(rh.parstriangularis\_2)  
3659 0.88164 (rh.parstriangularis\_4)(rh.rostralmiddlefrontal\_12)(rh.rostralmiddlefrontal\_3)  
3660 0.88164 (rh.posteriorcingulate\_4)(rh.supramarginal\_8)  
3661 0.88164 (rh.precentral\_10)(rh.precentral\_7)(rh.precentral\_8)  
3662 0.88164 (rh.precentral\_13)(rh.superiorfrontal\_16)  
3663 0.88164 (rh.rostralmiddlefrontal\_1)(rh.rostralmiddlefrontal\_8)  
3664 0.88164 (rh.superiorfrontal\_12)(rh.superiorfrontal\_15)(rh.superiorfrontal\_16)  
3665 0.88164 (rh.superiorfrontal\_2)(rh.superiorfrontal\_7)(rh.superiorfrontal\_9)  
3666 0.88164 (Right-Amygdala)(Right-Hippocampus)(rh.insula\_2)  
3667 0.88164 (Right-Amygdala)(Right-Hippocampus)(Right-Putamen)(rh.insula\_2)  
3668 0.88164 (Right-Amygdala)(Right-Hippocampus)(Right-Putamen)(Right-Thalamus-Proper)(rh.insula\_2)  
3669 0.88164 (Right-Amygdala)(Right-Hippocampus)(Right-Thalamus-Proper)(rh.insula\_2)  
3670 0.88164 (Right-Caudate)(lh.caudalanteriorcingulate\_1)(lh.caudalanteriorcingulate\_2)  
3671 0.88164 (Right-Caudate)(lh.caudalanteriorcingulate\_1)(lh.rostralanteriorcingulate\_1)  
3672 0.88164 (Right-Caudate)(rh.parstriangularis\_1)(rh.rostralmiddlefrontal\_8)  
3673 0.88164 (Right-Caudate)(rh.superiorfrontal\_14)  
3674 0.88164 (Right-Caudate)(Right-Putamen)(rh.precentral\_5)(rh.precentral\_7)  
3675 0.88164 (Right-Caudate)(Right-Putamen)(rh.superiorfrontal\_13)  
3676 0.88164 (Right-Caudate)(Right-Thalamus-Proper)(rh.precentral\_11)(rh.precentral\_13)  
3677 0.88164 (Right-Hippocampus)(rh.inferiortemporal\_1)(rh.insula\_5)  
3678 0.88164 (Right-Hippocampus)(Right-Putamen)(Right-Thalamus-Proper)(rh.insula\_1)  
3679 0.88164 (Right-Hippocampus)(Right-Thalamus-Proper)(rh.insula\_1)  
3680 0.88164 (Right-Putamen)(rh.insula\_6)(rh.lateralorbitofrontal\_6)  
3681 0.88164 (Right-Putamen)(rh.lateralorbitofrontal\_2)(rh.rostralmiddlefrontal\_12)(rh.rostralmiddlefrontal\_8)  
3682 0.88164 (Right-Putamen)(rh.precentral\_10)(rh.precentral\_8)  
3683 0.88164 (Right-Putamen)(rh.precentral\_13)(rh.superiorparietal\_1)  
3684 0.88164 (Right-Putamen)(rh.rostralmiddlefrontal\_10)  
3685 0.88164 (Right-Putamen)(rh.supramarginal\_1)(rh.supramarginal\_8)  
3686 0.87923 (Left-Accumbens-area)(Left-Hippocampus)(Left-Pallidum)(Left-Thalamus-Proper)  
3687 0.87923 (Left-Accumbens-area)(Left-Hippocampus)(Left-Pallidum)  
3688 0.87923 (Left-Accumbens-area)(Left-Hippocampus)(Left-Putamen)(Left-Thalamus-Proper)  
3689 0.87923 (Left-Accumbens-area)(Left-Hippocampus)(Left-Putamen)  
3690 0.87923 (Left-Amygdala)(lh.superiortemporal\_11)  
3691 0.87923 (Left-Caudate)(Left-Putamen)(lh.caudalanteriorcingulate\_1)(lh.caudalanteriorcingulate\_2)(lh.rostralanteriorcingulate\_1)(lh.rostralanteriorcingulate\_2)  
3692 0.87923 (Left-Caudate)(Left-Putamen)(lh.lateralorbitofrontal\_3)  
3693 0.87923 (Left-Caudate)(Left-Putamen)(lh.lateralorbitofrontal\_4)(lh.parstriangularis\_3)  
3694 0.87923 (Left-Caudate)(Left-Putamen)(lh.parstriangularis\_3)(lh.rostralmiddlefrontal\_12)  
3695 0.87923 (Left-Caudate)(Left-Putamen)(lh.rostralmiddlefrontal\_9)(lh.superiorfrontal\_4)  
3696 0.87923 (Left-Caudate)(lh.caudalmiddlefrontal\_1)(lh.superiorfrontal\_11)  
3697 0.87923 (Left-Caudate)(lh.caudalmiddlefrontal\_3)(lh.superiorfrontal\_11)(lh.superiorfrontal\_12)  
3698 0.87923 (Left-Caudate)(lh.caudalmiddlefrontal\_4)(lh.precentral\_9)  
3699 0.87923 (Left-Caudate)(lh.insula\_6)(lh.parsopercularis\_3)(lh.parstriangularis\_3)  
3700 0.87923 (Left-Caudate)(lh.lateralorbitofrontal\_2)(lh.medialorbitofrontal\_5)

3701 0.87923 (Left-Caudate)(lh.lateralorbitofrontal\_6)(lh.parstriangularis\_3)(lh.rostralmiddlefrontal\_9)  
3702 0.87923 (Left-Caudate)(lh.lateralorbitofrontal\_7)(lh.parstriangularis\_3)(lh.rostralmiddlefrontal\_12)  
3703 0.87923 (Left-Caudate)(lh.rostralanteriorcingulate\_2)(lh.superiorfrontal\_8)  
3704 0.87923 (Left-Hippocampus)(lh.insula\_2)(lh.superiortemporal\_2)  
3705 0.87923 (Left-Pallidum)(Left-Putamen)(lh.postcentral\_8)  
3706 0.87923 (Left-Pallidum)(Left-Putamen)(lh.precentral\_9)  
3707 0.87923 (Left-Pallidum)(lh.postcentral\_8)  
3708 0.87923 (Left-Pallidum)(lh.precentral\_11)(lh.precentral\_4)  
3709 0.87923 (Left-Pallidum)(lh.precentral\_9)  
3710 0.87923 (Left-Putamen)(lh.caudalanteriorcingulate\_2)(lh.caudalmiddlefrontal\_1)  
3711 0.87923 (Left-Putamen)(lh.caudalmiddlefrontal\_6)(lh.superiorfrontal\_12)  
3712 0.87923 (Left-Putamen)(lh.insula\_1)(lh.insula\_3)(lh.precentral\_11)  
3713 0.87923 (Left-Putamen)(lh.insula\_6)(lh.lateralorbitofrontal\_6)  
3714 0.87923 (Left-Putamen)(lh.lateralorbitofrontal\_4)(lh.lateralorbitofrontal\_7)(lh.rostralmiddlefrontal\_12)(lh.rostralmiddlefrontal\_9)  
3715 0.87923 (Left-Putamen)(lh.lateralorbitofrontal\_7)(lh.rostralanteriorcingulate\_1)(lh.rostralmiddlefrontal\_12)(lh.rostralmiddlefrontal\_9)  
3716 0.87923 (Left-Putamen)(lh.postcentral\_8)(lh.precentral\_9)  
3717 0.87923 (Left-Putamen)(lh.precentral\_14)(lh.precentral\_16)  
3718 0.87923 (Left-Putamen)(lh.precentral\_6)(lh.precentral\_7)  
3719 0.87923 (lh.bankssts\_2)(lh.fusiform\_5)  
3720 0.87923 (lh.caudalanteriorcingulate\_2)(lh.superiorfrontal\_10)(lh.superiorfrontal\_4)  
3721 0.87923 (lh.caudalmiddlefrontal\_3)(lh.parsopercularis\_3)  
3722 0.87923 (lh.caudalmiddlefrontal\_4)(lh.caudalmiddlefrontal\_6)(lh.precentral\_9)  
3723 0.87923 (lh.fusiform\_7)(lh.superiortemporal\_6)  
3724 0.87923 (lh.inferiortemporal\_4)(lh.middletemporal\_4)  
3725 0.87923 (lh.insula\_1)(lh.insula\_3)(lh.precentral\_11)  
3726 0.87923 (lh.isthmuscingulate\_2)(lh.precuneus\_3)  
3727 0.87923 (lh.lateraloccipital\_6)(lh.lateraloccipital\_8)  
3728 0.87923 (lh.lateralorbitofrontal\_4)(lh.lateralorbitofrontal\_6)(lh.lateralorbitofrontal\_7)(lh.parstriangularis\_3)(lh.rostralmiddlefrontal\_9)  
3729 0.87923 (lh.lateralorbitofrontal\_4)(lh.rostralanteriorcingulate\_1)(lh.rostralmiddlefrontal\_9)  
3730 0.87923 (lh.lateralorbitofrontal\_7)(lh.rostralmiddlefrontal\_11)  
3731 0.87923 (lh.paracentral\_1)(lh.paracentral\_5)  
3732 0.87923 (lh.parstriangularis\_3)(lh.rostralmiddlefrontal\_1)(lh.rostralmiddlefrontal\_12)(lh.rostralmiddlefrontal\_9)  
3733 0.87923 (lh.postcentral\_8)(lh.precentral\_11)(lh.precentral\_7)  
3734 0.87923 (lh.precentral\_4)(lh.precentral\_6)(lh.precentral\_7)  
3735 0.87923 (lh.precuneus\_8)(lh.superiorparietal\_6)  
3736 0.87923 (lh.rostralanteriorcingulate\_1)(lh.rostralmiddlefrontal\_12)(lh.superiorfrontal\_4)  
3737 0.87923 (lh.rostralmiddlefrontal\_12)(lh.rostralmiddlefrontal\_9)(lh.superiorfrontal\_1)(lh.superiorfrontal\_3)  
3738 0.87923 (lh.rostralmiddlefrontal\_4)(lh.rostralmiddlefrontal\_7)  
3739 0.87923 (lh.rostralmiddlefrontal\_6)(lh.rostralmiddlefrontal\_7)  
3740 0.87923 (lh.superiorfrontal\_10)(lh.superiorfrontal\_11)(lh.superiorfrontal\_4)(lh.superiorfrontal\_6)  
3741 0.87923 (lh.superiorfrontal\_11)(lh.superiorfrontal\_12)(lh.superiorfrontal\_4)  
3742 0.87923 (lh.superiorfrontal\_12)(lh.superiorfrontal\_4)(lh.superiorfrontal\_8)  
3743 0.87923 (lh.superiorfrontal\_14)(lh.superiorfrontal\_17)(lh.superiorfrontal\_18)  
3744 0.87923 (lh.superiorparietal\_5)(lh.supramarginal\_6)(lh.supramarginal\_9)  
3745 0.87923 (rh.bankssts\_1)(rh.bankssts\_2)(rh.middletemporal\_4)  
3746 0.87923 (rh.fusiform\_2)(rh.lateraloccipital\_8)(rh.lingual\_7)  
3747 0.87923 (rh.inferiorparietal\_12)(rh.precuneus\_1)  
3748 0.87923 (rh.inferiortemporal\_3)(rh.inferiortemporal\_5)  
3749 0.87923 (rh.insula\_1)(rh.precentral\_7)(rh.supramarginal\_1)  
3750 0.87923 (rh.insula\_2)(rh.precentral\_13)

3751 0.87923 (rh.insula\_3)(rh.insula\_6)  
3752 0.87923 (rh.lateraloccipital\_1)(rh.lateraloccipital\_3)(rh.superiorparietal\_11)  
3753 0.87923 (rh.lateraloccipital\_10)(rh.lingual\_5)(rh.lingual\_7)  
3754 0.87923 (rh.lateraloccipital\_4)(rh.lateraloccipital\_6)  
3755 0.87923 (rh.lateraloccipital\_4)(rh.lingual\_2)(rh.pericalcarine\_1)  
3756 0.87923 (rh.lateraloccipital\_4)(rh.pericalcarine\_2)  
3757 0.87923 (rh.lateralorbitofrontal\_6)(rh.rostralmiddlefrontal\_8)  
3758 0.87923 (rh.paracentral\_4)(rh.precentral\_13)(rh.precentral\_14)  
3759 0.87923 (rh.paracentral\_4)(rh.superiorfrontal\_11)  
3760 0.87923 (rh.paracentral\_5)(rh.paracentral\_6)  
3761 0.87923 (rh.paracentral\_5)(rh.postcentral\_11)  
3762 0.87923 (rh.parsopercularis\_1)(rh.parsopercularis\_4)  
3763 0.87923 (rh.precentral\_10)(rh.precentral\_12)  
3764 0.87923 (rh.precuneus\_10)(rh.precuneus\_8)(rh.superiorparietal\_8)  
3765 0.87923 (rh.precuneus\_2)(rh.precuneus\_4)(rh.precuneus\_7)  
3766 0.87923 (rh.rostralmiddlefrontal\_12)(rh.rostralmiddlefrontal\_6)  
3767 0.87923 (rh.superiortemporal\_10)(rh.superiortemporal\_6)  
3768 0.87923 (Right-Caudate)(rh.caudalmiddlefrontal\_4)(rh.precentral\_13)  
3769 0.87923 (Right-Caudate)(rh.lateralorbitofrontal\_6)(rh.lateralorbitofrontal\_7)  
3770 0.87923 (Right-Caudate)(rh.precentral\_6)  
3771 0.87923 (Right-Caudate)(rh.superiorfrontal\_11)(rh.superiorfrontal\_7)  
3772 0.87923 (Right-Caudate)(Right-Putamen)(rh.caudalmiddlefrontal\_4)(rh.superiorfrontal\_11)  
3773 0.87923 (Right-Caudate)(Right-Putamen)(rh.lateralorbitofrontal\_6)(rh.lateralorbitofrontal\_7)  
3774 0.87923 (Right-Putamen)(rh.caudalmiddlefrontal\_4)(rh.precentral\_13)  
3775 0.87923 (Right-Putamen)(rh.insula\_2)(rh.precentral\_13)  
3776 0.87923 (Right-Putamen)(rh.insula\_3)(rh.insula\_6)  
3777 0.87923 (Right-Putamen)(rh.precentral\_5)(rh.precentral\_8)  
3778 0.87681 (Left-Caudate)(Left-Pallidum)(Left-Putamen)(lh.insula\_1)(lh.precentral\_11)  
3779 0.87681 (Left-Caudate)(Left-Pallidum)(lh.insula\_1)(lh.precentral\_11)  
3780 0.87681 (Left-Caudate)(Left-Putamen)(Left-Thalamus-Proper)(lh.insula\_1)(lh.precentral\_7)  
3781 0.87681 (Left-Caudate)(Left-Putamen)(lh.caudalmiddlefrontal\_4)(lh.precentral\_9)  
3782 0.87681 (Left-Caudate)(Left-Putamen)(lh.caudalmiddlefrontal\_6)(lh.superiorfrontal\_12)  
3783 0.87681 (Left-Caudate)(Left-Putamen)(lh.lateralorbitofrontal\_7)(lh.rostralmiddlefrontal\_12)(lh.rostralmiddlefrontal\_9)  
3784 0.87681 (Left-Caudate)(Left-Putamen)(lh.medialorbitofrontal\_2)(lh.rostralanteriorcingulate\_1)(lh.rostralmiddlefrontal\_12)(lh.rostralmiddlefrontal\_9)  
3785 0.87681 (Left-Caudate)(Left-Thalamus-Proper)(lh.insula\_1)(lh.precentral\_7)  
3786 0.87681 (Left-Caudate)(lh.caudalanteriorcingulate\_1)(lh.superiorfrontal\_10)  
3787 0.87681 (Left-Caudate)(lh.insula\_6)(lh.rostralmiddlefrontal\_1)(lh.rostralmiddlefrontal\_4)  
3788 0.87681 (Left-Caudate)(lh.lateralorbitofrontal\_4)(lh.lateralorbitofrontal\_6)  
3789 0.87681 (Left-Caudate)(lh.lateralorbitofrontal\_7)(lh.medialorbitofrontal\_2)(lh.medialorbitofrontal\_4)  
3790 0.87681 (Left-Caudate)(lh.rostralanteriorcingulate\_1)(lh.rostralanteriorcingulate\_2)(lh.rostralmiddlefrontal\_4)  
3791 0.87681 (Left-Caudate)(lh.superiorfrontal\_3)  
3792 0.87681 (Left-Hippocampus)(lh.entorhinal\_1)(lh.parahippocampal\_1)  
3793 0.87681 (Left-Pallidum)(Left-Putamen)(lh.precentral\_11)(lh.precentral\_4)  
3794 0.87681 (Left-Putamen)(lh.caudalanteriorcingulate\_2)(lh.superiorfrontal\_4)  
3795 0.87681 (Left-Putamen)(lh.lateralorbitofrontal\_4)(lh.rostralanteriorcingulate\_1)(lh.rostralmiddlefrontal\_9)  
3796 0.87681 (Left-Putamen)(lh.lateralorbitofrontal\_6)(lh.lateralorbitofrontal\_7)(lh.parstriangularis\_3)(lh.rostralmiddlefrontal\_12)(lh.rostralmiddlefrontal\_9)  
3797 0.87681 (Left-Putamen)(lh.parstriangularis\_3)(lh.rostralanteriorcingulate\_2)  
3798 0.87681 (Left-Putamen)(lh.rostralmiddlefrontal\_4)(lh.rostralmiddlefrontal\_8)  
3799 0.87681 (Left-Putamen)(lh.rostralmiddlefrontal\_8)(lh.rostralmiddlefrontal\_9)  
3800 0.87681 (Left-Putamen)(lh.superiorfrontal\_10)(lh.superiorfrontal\_11)

3801 0.87681 (Left-Thalamus-Proper)(Right-Accumbens-area)  
3802 0.87681 (lh.caudalmiddlefrontal\_3)(lh.insula\_6)(lh.parstriangularis\_3)  
3803 0.87681 (lh.cuneus\_2)(lh.superiorparietal\_12)  
3804 0.87681 (lh.inferiorparietal\_10)(lh.inferiorparietal\_5)  
3805 0.87681 (lh.inferiorparietal\_5)(lh.supramarginal\_10)  
3806 0.87681 (lh.inferiortemporal\_3)(lh.middletemporal\_3)(lh.middletemporal\_4)  
3807 0.87681 (lh.lateraloccipital\_11)(lh.lateraloccipital\_6)(lh.lingual\_1)(lh.pericalcarine\_2)  
3808 0.87681 (lh.lateraloccipital\_11)(lh.lingual\_1)(lh.pericalcarine\_3)  
3809 0.87681 (lh.lateraloccipital\_2)(lh.lateraloccipital\_3)(lh.pericalcarine\_1)  
3810 0.87681 (lh.lateraloccipital\_3)(lh.lingual\_1)(lh.pericalcarine\_2)(lh.pericalcarine\_3)  
3811 0.87681 (lh.lateraloccipital\_7)(lh.lingual\_1)  
3812 0.87681 (lh.lateralorbitofrontal\_7)(lh.medialorbitofrontal\_2)(lh.parstriangularis\_3)  
3813 0.87681 (lh.lateralorbitofrontal\_7)(lh.parstriangularis\_3)(lh.rostralanteriorcingulate\_1)(lh.rostralmiddlefrontal\_9)  
3814 0.87681 (lh.medialorbitofrontal\_2)(lh.rostralmiddlefrontal\_9)(lh.superiorfrontal\_3)(lh.superiorfrontal\_4)  
3815 0.87681 (lh.paracentral\_5)(lh.precuneus\_2)(lh.superiorparietal\_2)  
3816 0.87681 (lh.parstriangularis\_3)(lh.rostralanteriorcingulate\_1)(lh.rostralanteriorcingulate\_2)  
3817 0.87681 (lh.precentral\_11)(lh.precentral\_13)(lh.precentral\_14)  
3818 0.87681 (lh.precentral\_11)(lh.precentral\_6)(lh.precentral\_7)  
3819 0.87681 (lh.precuneus\_10)(lh.precuneus\_6)(lh.precuneus\_9)(lh.superiorparietal\_11)  
3820 0.87681 (lh.precuneus\_6)(lh.precuneus\_7)  
3821 0.87681 (lh.rostralanteriorcingulate\_1)(lh.rostralmiddlefrontal\_1)(lh.rostralmiddlefrontal\_9)  
3822 0.87681 (lh.rostralanteriorcingulate\_1)(lh.rostralmiddlefrontal\_1)  
3823 0.87681 (lh.rostralanteriorcingulate\_2)(lh.rostralmiddlefrontal\_9)(lh.superiorfrontal\_4)  
3824 0.87681 (lh.superiorfrontal\_11)(lh.superiorfrontal\_4)(lh.superiorfrontal\_8)(lh.superiorfrontal\_9)  
3825 0.87681 (lh.superiorfrontal\_16)(lh.superiorfrontal\_17)  
3826 0.87681 (lh.superiorparietal\_12)(lh.superiorparietal\_13)  
3827 0.87681 (lh.superiorparietal\_2)(lh.superiorparietal\_5)  
3828 0.87681 (lh.supramarginal\_2)(lh.supramarginal\_6)  
3829 0.87681 (rh.bankssts\_2)(rh.inferiorparietal\_10)(rh.inferiorparietal\_4)  
3830 0.87681 (rh.caudalanteriorcingulate\_2)(rh.superiorfrontal\_7)  
3831 0.87681 (rh.caudalmiddlefrontal\_4)(rh.rostralmiddlefrontal\_3)(rh.rostralmiddlefrontal\_5)  
3832 0.87681 (rh.caudalmiddlefrontal\_4)(rh.superiorfrontal\_11)(rh.superiorfrontal\_13)(rh.superiorfrontal\_9)  
3833 0.87681 (rh.fusiform\_1)(rh.fusiform\_2)(rh.lateraloccipital\_10)(rh.lingual\_5)  
3834 0.87681 (rh.inferiorparietal\_10)(rh.inferiorparietal\_11)(rh.lateraloccipital\_10)  
3835 0.87681 (rh.inferiortemporal\_4)(rh.middletemporal\_6)(rh.middletemporal\_7)  
3836 0.87681 (rh.insula\_1)(rh.superiorparietal\_1)(rh.supramarginal\_8)(rh.supramarginal\_9)  
3837 0.87681 (rh.lateraloccipital\_10)(rh.lateraloccipital\_8)(rh.lingual\_7)  
3838 0.87681 (rh.lateraloccipital\_4)(rh.lateraloccipital\_5)(rh.lateraloccipital\_8)  
3839 0.87681 (rh.lateralorbitofrontal\_6)(rh.medialorbitofrontal\_2)(rh.rostralmiddlefrontal\_12)  
3840 0.87681 (rh.lateralorbitofrontal\_7)(rh.rostralmiddlefrontal\_8)(rh.superiorfrontal\_2)  
3841 0.87681 (rh.lingual\_7)(rh.superiorparietal\_11)  
3842 0.87681 (rh.postcentral\_8)(rh.supramarginal\_1)  
3843 0.87681 (rh.precuneus\_4)(rh.superiorparietal\_8)  
3844 0.87681 (rh.precuneus\_5)(rh.superiorparietal\_8)  
3845 0.87681 (rh.rostralmiddlefrontal\_10)(rh.rostralmiddlefrontal\_11)(rh.superiorfrontal\_2)  
3846 0.87681 (rh.rostralmiddlefrontal\_12)(rh.rostralmiddlefrontal\_13)  
3847 0.87681 (rh.superiorfrontal\_2)(rh.superiorfrontal\_4)(rh.superiorfrontal\_7)  
3848 0.87681 (rh.superiorfrontal\_2)(rh.superiorfrontal\_6)(rh.superiorfrontal\_7)(rh.superiorfrontal\_8)  
3849 0.87681 (rh.superiorparietal\_1)(rh.superiorparietal\_7)(rh.superiorparietal\_8)  
3850 0.87681 (rh.supramarginal\_6)(rh.supramarginal\_7)(rh.supramarginal\_9)

3851 0.87681 (Right-Amygdala)(Right-Hippocampus)(rh.inferiortemporal\_1)(rh.insula\_5)  
3852 0.87681 (Right-Caudate)(rh.lateralorbitofrontal\_4)(rh.lateralorbitofrontal\_6)  
3853 0.87681 (Right-Caudate)(Right-Hippocampus)(rh.insula\_1)  
3854 0.87681 (Right-Caudate)(Right-Hippocampus)(rh.insula\_2)  
3855 0.87681 (Right-Caudate)(Right-Hippocampus)(Right-Putamen)(rh.insula\_1)  
3856 0.87681 (Right-Caudate)(Right-Hippocampus)(Right-Putamen)(rh.insula\_2)  
3857 0.87681 (Right-Caudate)(Right-Hippocampus)(Right-Putamen)(Right-Thalamus-Proper)(rh.insula\_2)  
3858 0.87681 (Right-Caudate)(Right-Hippocampus)(Right-Thalamus-Proper)(rh.insula\_2)  
3859 0.87681 (Right-Caudate)(Right-Putamen)(rh.caudalmiddlefrontal\_4)(rh.precentral\_13)  
3860 0.87681 (Right-Caudate)(Right-Putamen)(rh.caudalmiddlefrontal\_4)(rh.superiorfrontal\_13)  
3861 0.87681 (Right-Caudate)(Right-Putamen)(rh.lateralorbitofrontal\_4)(rh.lateralorbitofrontal\_6)  
3862 0.87681 (Right-Caudate)(Right-Putamen)(rh.lateralorbitofrontal\_5)(rh.medialorbitofrontal\_2)  
3863 0.87681 (Right-Caudate)(Right-Putamen)(rh.parsopercularis\_4)(rh.rostralmiddlefrontal\_3)  
3864 0.87681 (Right-Hippocampus)(rh.transversetemporal\_1)  
3865 0.87681 (Right-Putamen)(rh.insula\_1)(rh.superiorparietal\_1)(rh.supramarginal\_1)(rh.supramarginal\_9)  
3866 0.87681 (Right-Putamen)(rh.lateralorbitofrontal\_7)(rh.rostralmiddlefrontal\_12)(rh.superiorfrontal\_2)  
3867 0.87681 (Right-Putamen)(rh.parstriangularis\_1)(rh.rostralmiddlefrontal\_5)  
3868 0.87681 (Right-Putamen)(rh.precentral\_10)(rh.precentral\_6)  
3869 0.87681 (Right-Putamen)(rh.precentral\_7)(rh.supramarginal\_1)  
3870 0.87681 (Right-Putamen)(rh.rostralmiddlefrontal\_12)(rh.rostralmiddlefrontal\_3)  
3871 0.8744 (Left-Caudate)(Left-Putamen)(lh.caudalanteriorcingulate\_2)(lh.caudalmiddlefrontal\_1)  
3872 0.8744 (Left-Caudate)(Left-Putamen)(lh.caudalmiddlefrontal\_1)(lh.caudalmiddlefrontal\_5)  
3873 0.8744 (Left-Caudate)(Left-Putamen)(lh.lateralorbitofrontal\_6)(lh.lateralorbitofrontal\_7)  
3874 0.8744 (Left-Caudate)(Left-Putamen)(lh.lateralorbitofrontal\_6)(lh.parstriangularis\_3)  
3875 0.8744 (Left-Caudate)(lh.caudalanteriorcingulate\_1)(lh.rostralmiddlefrontal\_4)  
3876 0.8744 (Left-Caudate)(lh.caudalmiddlefrontal\_4)(lh.superiorfrontal\_12)  
3877 0.8744 (Left-Caudate)(lh.insula\_6)(lh.precentral\_14)  
3878 0.8744 (Left-Caudate)(lh.lateralorbitofrontal\_2)(lh.lateralorbitofrontal\_7)(lh.medialorbitofrontal\_2)  
3879 0.8744 (Left-Caudate)(lh.lateralorbitofrontal\_7)(lh.rostralanteriorcingulate\_1)(lh.rostralmiddlefrontal\_12)  
3880 0.8744 (Left-Caudate)(lh.parstriangularis\_3)(lh.rostralanteriorcingulate\_1)(lh.rostralmiddlefrontal\_12)  
3881 0.8744 (Left-Caudate)(lh.parstriangularis\_3)(lh.rostralanteriorcingulate\_2)  
3882 0.8744 (Left-Caudate)(lh.rostralmiddlefrontal\_3)  
3883 0.8744 (Left-Caudate)(lh.rostralmiddlefrontal\_8)(lh.rostralmiddlefrontal\_9)  
3884 0.8744 (Left-Hippocampus)(lh.bankssts\_2)(lh.fusiform\_7)  
3885 0.8744 (Left-Hippocampus)(lh.fusiform\_6)(lh.fusiform\_7)  
3886 0.8744 (Left-Putamen)(lh.insula\_1)(lh.postcentral\_8)(lh.precentral\_11)  
3887 0.8744 (Left-Putamen)(lh.insula\_6)(lh.rostralmiddlefrontal\_1)(lh.rostralmiddlefrontal\_9)  
3888 0.8744 (Left-Putamen)(lh.rostralmiddlefrontal\_4)(lh.rostralmiddlefrontal\_9)(lh.superiorfrontal\_4)  
3889 0.8744 (Left-Putamen)(lh.superiorfrontal\_11)(lh.superiorfrontal\_14)  
3890 0.8744 (Left-Putamen)(lh.transversetemporal\_2)  
3891 0.8744 (Left-Thalamus-Proper)(lh.superiorparietal\_3)  
3892 0.8744 (Left-Thalamus-Proper)(Right-Accumbens-area)(Right-Thalamus-Proper)  
3893 0.8744 (lh.bankssts\_2)(lh.inferiortemporal\_6)(lh.middletemporal\_3)  
3894 0.8744 (lh.bankssts\_2)(lh.middletemporal\_4)  
3895 0.8744 (lh.caudalanteriorcingulate\_2)(lh.superiorfrontal\_10)(lh.superiorfrontal\_4)(lh.superiorfrontal\_8)  
3896 0.8744 (lh.caudalmiddlefrontal\_1)(lh.caudalmiddlefrontal\_2)(lh.caudalmiddlefrontal\_3)  
3897 0.8744 (lh.caudalmiddlefrontal\_1)(lh.caudalmiddlefrontal\_3)(lh.rostralmiddlefrontal\_4)  
3898 0.8744 (lh.caudalmiddlefrontal\_3)(lh.insula\_6)(lh.rostralmiddlefrontal\_4)  
3899 0.8744 (lh.fusiform\_1)(lh.lingual\_6)(lh.lingual\_8)  
3900 0.8744 (lh.inferiorparietal\_6)(lh.inferiorparietal\_7)(lh.inferiorparietal\_9)

3901 0.8744 (lh.insula\_1)(lh.superiorparietal\_3)(lh.superiorparietal\_5)  
3902 0.8744 (lh.insula\_6)(lh.parsopercularis\_4)  
3903 0.8744 (lh.lateraloccipital\_1)(lh.lateraloccipital\_3)(lh.pericalcarine\_1)  
3904 0.8744 (lh.lateraloccipital\_2)(lh.pericalcarine\_3)(lh.superiorparietal\_12)  
3905 0.8744 (lh.medialorbitofrontal\_2)(lh.parstriangularis\_3)(lh.rostralmiddlefrontal\_12)  
3906 0.8744 (lh.paracentral\_5)(lh.superiorfrontal\_8)  
3907 0.8744 (lh.parsorbitalis\_1)(lh.parstriangularis\_3)(lh.rostralmiddlefrontal\_6)  
3908 0.8744 (lh.pericalcarine\_3)(lh.precuneus\_9)(lh.superiorparietal\_12)  
3909 0.8744 (lh.precuneus\_10)(lh.precuneus\_7)  
3910 0.8744 (lh.precuneus\_2)(lh.precuneus\_6)  
3911 0.8744 (lh.rostralmiddlefrontal\_8)(lh.superiorfrontal\_10)  
3912 0.8744 (lh.superiorfrontal\_11)(lh.superiorfrontal\_12)(lh.superiorfrontal\_4)(lh.superiorfrontal\_8)  
3913 0.8744 (lh.superiortemporal\_11)(lh.superiortemporal\_9)  
3914 0.8744 (rh.caudalanteriorcingulate\_3)(rh.posteriorcingulate\_3)  
3915 0.8744 (rh.caudalmiddlefrontal\_1)(rh.caudalmiddlefrontal\_2)(rh.caudalmiddlefrontal\_4)  
3916 0.8744 (rh.caudalmiddlefrontal\_4)(rh.rostralmiddlefrontal\_1)(rh.rostralmiddlefrontal\_5)  
3917 0.8744 (rh.fusiform\_1)(rh.lingual\_2)(rh.pericalcarine\_1)  
3918 0.8744 (rh.fusiform\_2)(rh.fusiform\_4)  
3919 0.8744 (rh.fusiform\_6)(rh.inferiortemporal\_7)  
3920 0.8744 (rh.inferiorparietal\_1)(rh.inferiorparietal\_4)(rh.supramarginal\_9)  
3921 0.8744 (rh.inferiorparietal\_10)(rh.lateraloccipital\_4)  
3922 0.8744 (rh.inferiorparietal\_12)(rh.lingual\_7)(rh.precuneus\_2)  
3923 0.8744 (rh.inferiortemporal\_1)(rh.inferiortemporal\_2)  
3924 0.8744 (rh.inferiortemporal\_3)(rh.inferiortemporal\_4)(rh.middletemporal\_4)  
3925 0.8744 (rh.isthmuscingulate\_1)(rh.posteriorcingulate\_3)  
3926 0.8744 (rh.lateralorbitofrontal\_2)(rh.lateralorbitofrontal\_6)(rh.lateralorbitofrontal\_7)(rh.parstriangularis\_1)(rh.rostralmiddlefrontal\_12)  
3927 0.8744 (rh.lateralorbitofrontal\_7)(rh.rostralmiddlefrontal\_11)(rh.rostralmiddlefrontal\_12)  
3928 0.8744 (rh.parsopercularis\_2)(rh.parsopercularis\_3)(rh.precentral\_1)  
3929 0.8744 (rh.parsorbitalis\_1)(rh.parstriangularis\_3)  
3930 0.8744 (rh.precuneus\_7)(rh.precuneus\_8)  
3931 0.8744 (rh.precuneus\_7)(rh.superiorparietal\_10)(rh.superiorparietal\_8)  
3932 0.8744 (Right-Caudate)(rh.caudalanteriorcingulate\_3)(rh.posteriorcingulate\_3)  
3933 0.8744 (Right-Caudate)(rh.parsopercularis\_4)(rh.parstriangularis\_1)  
3934 0.8744 (Right-Caudate)(rh.precentral\_15)  
3935 0.8744 (Right-Caudate)(Right-Putamen)(rh.caudalmiddlefrontal\_4)(rh.superiorfrontal\_7)  
3936 0.8744 (Right-Caudate)(Right-Putamen)(rh.parstriangularis\_1)(rh.rostralmiddlefrontal\_8)  
3937 0.8744 (Right-Caudate)(Right-Putamen)(rh.precentral\_6)  
3938 0.8744 (Right-Hippocampus)(rh.bankssts\_3)  
3939 0.8744 (Right-Hippocampus)(rh.fusiform\_8)(rh.inferiortemporal\_1)  
3940 0.8744 (Right-Hippocampus)(rh.insula\_1)(rh.supramarginal\_9)  
3941 0.8744 (Right-Hippocampus)(rh.middletemporal\_9)  
3942 0.8744 (Right-Putamen)(rh.lateralorbitofrontal\_6)(rh.medialorbitofrontal\_2)(rh.rostralmiddlefrontal\_12)  
3943 0.8744 (Right-Putamen)(rh.lateralorbitofrontal\_6)(rh.rostralmiddlefrontal\_8)  
3944 0.8744 (Right-Putamen)(rh.lateralorbitofrontal\_7)(rh.rostralmiddlefrontal\_11)  
3945 0.8744 (Right-Putamen)(rh.precentral\_6)(rh.precentral\_7)  
3946 0.8744 (Right-Putamen)(rh.rostralmiddlefrontal\_11)(rh.superiorfrontal\_2)  
3947 0.87198 (Left-Accumbens-area)(Left-Hippocampus)(Left-Pallidum)(Left-Putamen)(Left-Thalamus-Proper)  
3948 0.87198 (Left-Accumbens-area)(Left-Hippocampus)(Left-Pallidum)(Left-Putamen)  
3949 0.87198 (Left-Amygdala)(Left-Hippocampus)(Left-Putamen)(Left-Thalamus-Proper)(lh.insula\_2)  
3950 0.87198 (Left-Amygdala)(Left-Hippocampus)(Left-Thalamus-Proper)(lh.insula\_2)

3951 0.87198 (Left-Amygdala)(Left-Putamen)(Left-Thalamus-Proper)(lh.insula\_2)  
3952 0.87198 (Left-Amygdala)(Left-Thalamus-Proper)(lh.insula\_2)  
3953 0.87198 (Left-Caudate)(Left-Pallidum)(Left-Putamen)(lh.postcentral\_8)  
3954 0.87198 (Left-Caudate)(Left-Pallidum)(lh.postcentral\_8)  
3955 0.87198 (Left-Caudate)(Left-Pallidum)(lh.posteriorcingulate\_3)  
3956 0.87198 (Left-Caudate)(Left-Pallidum)(lh.precentral\_11)(lh.precentral\_4)  
3957 0.87198 (Left-Caudate)(Left-Putamen)(lh.lateralorbitofrontal\_2)(lh.medialorbitofrontal\_5)  
3958 0.87198 (Left-Caudate)(Left-Putamen)(lh.lateralorbitofrontal\_4)(lh.lateralorbitofrontal\_6)  
3959 0.87198 (Left-Caudate)(Left-Putamen)(lh.lateralorbitofrontal\_7)(lh.rostralanteriorcingulate\_1)(lh.rostralmiddlefrontal\_9)  
3960 0.87198 (Left-Caudate)(Left-Putamen)(lh.medialorbitofrontal\_2)(lh.medialorbitofrontal\_4)  
3961 0.87198 (Left-Caudate)(Left-Putamen)(lh.parstriangularis\_3)(lh.rostralmiddlefrontal\_12)(lh.rostralmiddlefrontal\_9)  
3962 0.87198 (Left-Caudate)(Left-Putamen)(lh.rostralmiddlefrontal\_8)  
3963 0.87198 (Left-Caudate)(lh.caudalanteriorcingulate\_2)(lh.rostralanteriorcingulate\_2)(lh.superiorfrontal\_4)  
3964 0.87198 (Left-Caudate)(lh.caudalmiddlefrontal\_1)(lh.caudalmiddlefrontal\_3)(lh.caudalmiddlefrontal\_5)  
3965 0.87198 (Left-Caudate)(lh.caudalmiddlefrontal\_4)(lh.precentral\_11)(lh.precentral\_9)  
3966 0.87198 (Left-Caudate)(lh.lateralorbitofrontal\_6)(lh.rostralmiddlefrontal\_1)  
3967 0.87198 (Left-Caudate)(lh.lateralorbitofrontal\_6)(lh.rostralmiddlefrontal\_12)  
3968 0.87198 (Left-Caudate)(lh.paracentral\_5)(lh.postcentral\_3)  
3969 0.87198 (Left-Caudate)(rh.caudalanteriorcingulate\_3)  
3970 0.87198 (Left-Caudate)(Right-Caudate)(rh.caudalanteriorcingulate\_3)  
3971 0.87198 (Left-Hippocampus)(lh.lingual\_6)(lh.lingual\_7)  
3972 0.87198 (Left-Pallidum)(lh.posteriorcingulate\_3)  
3973 0.87198 (Left-Putamen)(Left-Thalamus-Proper)(lh.insula\_1)(lh.insula\_2)(lh.precentral\_11)  
3974 0.87198 (Left-Putamen)(lh.caudalanteriorcingulate\_2)(lh.caudalmiddlefrontal\_3)(lh.superiorfrontal\_12)  
3975 0.87198 (Left-Putamen)(lh.caudalmiddlefrontal\_3)(lh.parsopercularis\_3)  
3976 0.87198 (Left-Putamen)(lh.insula\_6)(lh.parstriangularis\_3)(lh.rostralmiddlefrontal\_9)  
3977 0.87198 (Left-Putamen)(lh.lateralorbitofrontal\_4)(lh.lateralorbitofrontal\_7)(lh.parstriangularis\_3)(lh.rostralmiddlefrontal\_9)  
3978 0.87198 (Left-Putamen)(lh.lateralorbitofrontal\_7)(lh.medialorbitofrontal\_2)(lh.rostralanteriorcingulate\_1)(lh.rostralmiddlefrontal\_9)  
3979 0.87198 (Left-Putamen)(lh.medialorbitofrontal\_2)(lh.medialorbitofrontal\_4)  
3980 0.87198 (Left-Putamen)(lh.medialorbitofrontal\_2)(lh.parstriangularis\_3)  
3981 0.87198 (Left-Putamen)(lh.postcentral\_8)(lh.precentral\_4)(lh.precentral\_7)  
3982 0.87198 (Left-Putamen)(lh.rostralanteriorcingulate\_1)(lh.rostralmiddlefrontal\_12)(lh.superiorfrontal\_3)  
3983 0.87198 (Left-Putamen)(lh.rostralanteriorcingulate\_2)(lh.rostralmiddlefrontal\_4)(lh.superiorfrontal\_4)  
3984 0.87198 (Left-Thalamus-Proper)(lh.insula\_1)(lh.insula\_2)(lh.precentral\_11)  
3985 0.87198 (lh.caudalmiddlefrontal\_1)(lh.caudalmiddlefrontal\_3)(lh.caudalmiddlefrontal\_4)(lh.caudalmiddlefrontal\_5)  
3986 0.87198 (lh.caudalmiddlefrontal\_3)(lh.rostralmiddlefrontal\_9)  
3987 0.87198 (lh.cuneus\_1)(lh.pericalcarine\_1)(lh.pericalcarine\_3)  
3988 0.87198 (lh.cuneus\_2)(lh.pericalcarine\_2)  
3989 0.87198 (lh.fusiform\_1)(lh.fusiform\_3)(lh.lateraloccipital\_9)  
3990 0.87198 (lh.fusiform\_2)(lh.lingual\_4)(lh.lingual\_8)(lh.pericalcarine\_3)  
3991 0.87198 (lh.inferiorparietal\_1)(lh.precuneus\_9)  
3992 0.87198 (lh.inferiorparietal\_8)(lh.inferiorparietal\_9)(lh.superiorparietal\_11)  
3993 0.87198 (lh.insula\_6)(lh.parstriangularis\_3)(lh.rostralmiddlefrontal\_1)(lh.rostralmiddlefrontal\_4)  
3994 0.87198 (lh.lateraloccipital\_11)(lh.pericalcarine\_2)(lh.pericalcarine\_3)  
3995 0.87198 (lh.lateralorbitofrontal\_7)(lh.medialorbitofrontal\_1)(lh.rostralmiddlefrontal\_12)  
3996 0.87198 (lh.paracentral\_1)(lh.paracentral\_4)(lh.precentral\_2)(lh.precentral\_3)  
3997 0.87198 (lh.parstriangularis\_3)(lh.rostralmiddlefrontal\_8)  
3998 0.87198 (lh.pericalcarine\_3)(lh.precuneus\_11)(lh.precuneus\_9)  
3999 0.87198 (lh.posteriorcingulate\_1)(lh.superiorfrontal\_12)  
4000 0.87198 (lh.precentral\_11)(lh.precentral\_12)



4001 0.87198 (lh.rostralanteriorcingulate\_1)(lh.rostralmiddlefrontal\_8)  
4002 0.87198 (lh.superiorfrontal\_10)(lh.superiorfrontal\_11)(lh.superiorfrontal\_6)(lh.superiorfrontal\_7)  
4003 0.87198 (lh.superiorfrontal\_11)(lh.superiorfrontal\_13)(lh.superiorfrontal\_14)(lh.superiorfrontal\_8)  
4004 0.87198 (lh.supramarginal\_10)(lh.supramarginal\_6)  
4005 0.87198 (rh.caudalmiddlefrontal\_4)(rh.insula\_7)(rh.rostralmiddlefrontal\_3)  
4006 0.87198 (rh.cuneus\_3)(rh.lateraloccipital\_1)(rh.pericalcarine\_2)  
4007 0.87198 (rh.fusiform\_1)(rh.lateraloccipital\_4)(rh.lateraloccipital\_8)(rh.lingual\_2)  
4008 0.87198 (rh.fusiform\_7)(rh.inferiortemporal\_5)  
4009 0.87198 (rh.inferiorparietal\_4)(rh.superiorparietal\_1)  
4010 0.87198 (rh.inferiorparietal\_4)(rh.superiortemporal\_1)  
4011 0.87198 (rh.inferiortemporal\_7)(rh.lateraloccipital\_10)(rh.middletemporal\_1)  
4012 0.87198 (rh.lateraloccipital\_3)(rh.pericalcarine\_1)(rh.superiorparietal\_11)  
4013 0.87198 (rh.lateralorbitofrontal\_6)(rh.parstriangularis\_1)(rh.rostralmiddlefrontal\_8)  
4014 0.87198 (rh.lateralorbitofrontal\_6)(rh.rostralmiddlefrontal\_7)  
4015 0.87198 (rh.lateralorbitofrontal\_7)(rh.parstriangularis\_1)(rh.rostralmiddlefrontal\_8)  
4016 0.87198 (rh.medialorbitofrontal\_2)(rh.rostralmiddlefrontal\_11)(rh.superiorfrontal\_1)  
4017 0.87198 (rh.pericalcarine\_3)(rh.superiorparietal\_11)  
4018 0.87198 (rh.precentral\_11)(rh.superiorparietal\_1)  
4019 0.87198 (rh.rostralmiddlefrontal\_10)(rh.rostralmiddlefrontal\_9)  
4020 0.87198 (rh.superiorfrontal\_11)(rh.superiorfrontal\_13)(rh.superiorfrontal\_14)  
4021 0.87198 (rh.superiorfrontal\_2)(rh.superiorfrontal\_5)(rh.superiorfrontal\_6)(rh.superiorfrontal\_7)(rh.superiorfrontal\_8)  
4022 0.87198 (rh.superiorfrontal\_2)(rh.superiorfrontal\_5)(rh.superiorfrontal\_7)(rh.superiorfrontal\_9)  
4023 0.87198 (rh.superiortemporal\_1)(rh.superiortemporal\_9)  
4024 0.87198 (Right-Caudate)(rh.insula\_1)(rh.insula\_2)  
4025 0.87198 (Right-Caudate)(Right-Hippocampus)(Right-Putamen)(Right-Thalamus-Proper)(rh.insula\_1)  
4026 0.87198 (Right-Caudate)(Right-Hippocampus)(Right-Thalamus-Proper)(rh.insula\_1)  
4027 0.87198 (Right-Caudate)(Right-Putamen)(rh.caudalanteriorcingulate\_3)  
4028 0.87198 (Right-Caudate)(Right-Putamen)(rh.insula\_1)(rh.insula\_2)  
4029 0.87198 (Right-Caudate)(Right-Putamen)(rh.rostralmiddlefrontal\_8)(rh.superiorfrontal\_2)  
4030 0.87198 (Right-Caudate)(Right-Putamen)(Right-Thalamus-Proper)(rh.precentral\_11)(rh.precentral\_13)  
4031 0.87198 (Right-Hippocampus)(rh.fusiform\_8)(rh.inferiortemporal\_2)  
4032 0.87198 (Right-Hippocampus)(Right-Putamen)(rh.insula\_1)(rh.supramarginal\_9)  
4033 0.87198 (Right-Putamen)(rh.caudalanteriorcingulate\_3)  
4034 0.87198 (Right-Putamen)(rh.caudalmiddlefrontal\_2)(rh.caudalmiddlefrontal\_4)  
4035 0.87198 (Right-Putamen)(rh.insula\_1)(rh.postcentral\_1)(rh.precentral\_7)  
4036 0.87198 (Right-Putamen)(rh.lateralorbitofrontal\_7)(rh.medialorbitofrontal\_2)(rh.rostralmiddlefrontal\_11)  
4037 0.87198 (Right-Putamen)(rh.lateralorbitofrontal\_7)(rh.medialorbitofrontal\_2)(rh.superiorfrontal\_2)  
4038 0.87198 (Right-Putamen)(rh.parstriangularis\_1)(rh.rostralmiddlefrontal\_5)(rh.rostralmiddlefrontal\_8)  
4039 0.87198 (Right-Putamen)(rh.rostralmiddlefrontal\_5)(rh.superiorfrontal\_2)  
4040 0.86957 (Left-Caudate)(Left-Pallidum)(Left-Putamen)(lh.precentral\_11)(lh.precentral\_4)  
4041 0.86957 (Left-Caudate)(Left-Putamen)(lh.caudalanteriorcingulate\_2)(lh.caudalmiddlefrontal\_3)(lh.superiorfrontal\_12)  
4042 0.86957 (Left-Caudate)(Left-Putamen)(lh.caudalmiddlefrontal\_4)(lh.precentral\_11)(lh.precentral\_9)  
4043 0.86957 (Left-Caudate)(Left-Putamen)(lh.insula\_6)(lh.precentral\_14)  
4044 0.86957 (Left-Caudate)(Left-Putamen)(lh.lateralorbitofrontal\_7)(lh.parstriangularis\_3)(lh.rostralmiddlefrontal\_9)  
4045 0.86957 (Left-Caudate)(lh.caudalmiddlefrontal\_5)(lh.superiorfrontal\_12)  
4046 0.86957 (Left-Caudate)(lh.insula\_1)(lh.precentral\_11)(lh.precentral\_7)  
4047 0.86957 (Left-Caudate)(lh.insula\_6)(lh.rostralmiddlefrontal\_1)(lh.rostralmiddlefrontal\_9)  
4048 0.86957 (Left-Caudate)(lh.lateralorbitofrontal\_7)(lh.medialorbitofrontal\_2)(lh.rostralmiddlefrontal\_12)(lh.rostralmiddlefrontal\_9)  
4049 0.86957 (Left-Caudate)(lh.lateralorbitofrontal\_7)(lh.parstriangularis\_3)(lh.rostralanteriorcingulate\_1)  
4050 0.86957 (Left-Caudate)(lh.medialorbitofrontal\_2)(lh.superiorfrontal\_3)

4051 0.86957 (Left-Caudate)(lh.posteriorcingulate\_1)(lh.superiorfrontal\_12)  
4052 0.86957 (Left-Caudate)(lh.rostralanteriorcingulate\_1)(lh.rostralmiddlefrontal\_1)  
4053 0.86957 (Left-Caudate)(lh.rostralanteriorcingulate\_1)(lh.rostralmiddlefrontal\_4)(lh.superiorfrontal\_4)  
4054 0.86957 (Left-Hippocampus)(lh.fusiform\_7)(lh.inferiortemporal\_1)  
4055 0.86957 (Left-Putamen)(lh.caudalmiddlefrontal\_5)(lh.precentral\_9)  
4056 0.86957 (Left-Putamen)(lh.insula\_2)(lh.insula\_3)  
4057 0.86957 (Left-Putamen)(lh.insula\_6)(lh.parsopercularis\_1)(lh.parsopercularis\_3)(lh.rostralmiddlefrontal\_1)  
4058 0.86957 (Left-Putamen)(lh.insula\_6)(lh.parsopercularis\_1)(lh.parstriangularis\_3)(lh.rostralmiddlefrontal\_1)  
4059 0.86957 (Left-Putamen)(lh.insula\_6)(lh.parstriangularis\_3)(lh.rostralmiddlefrontal\_4)  
4060 0.86957 (Left-Putamen)(lh.lateralorbitofrontal\_4)(lh.lateralorbitofrontal\_6)(lh.lateralorbitofrontal\_7)(lh.parstriangularis\_3)(lh.rostralmiddlefrontal\_12)  
4061 0.86957 (Left-Putamen)(lh.lateralorbitofrontal\_7)(lh.medialorbitofrontal\_5)  
4062 0.86957 (Left-Putamen)(lh.medialorbitofrontal\_2)(lh.rostralanteriorcingulate\_1)(lh.superiorfrontal\_3)  
4063 0.86957 (Left-Putamen)(lh.medialorbitofrontal\_2)(lh.rostralmiddlefrontal\_12)(lh.rostralmiddlefrontal\_9)(lh.superiorfrontal\_3)  
4064 0.86957 (Left-Thalamus-Proper)(lh.postcentral\_8)(lh.precentral\_7)  
4065 0.86957 (lh.caudalanteriorcingulate\_2)(lh.caudalmiddlefrontal\_3)(lh.superiorfrontal\_11)(lh.superiorfrontal\_12)  
4066 0.86957 (lh.caudalanteriorcingulate\_2)(lh.superiorfrontal\_10)(lh.superiorfrontal\_11)(lh.superiorfrontal\_4)  
4067 0.86957 (lh.caudalmiddlefrontal\_1)(lh.rostralmiddlefrontal\_3)(lh.rostralmiddlefrontal\_4)  
4068 0.86957 (lh.caudalmiddlefrontal\_6)(lh.precentral\_13)  
4069 0.86957 (lh.fusiform\_1)(lh.fusiform\_2)(lh.pericalcarine\_3)  
4070 0.86957 (lh.fusiform\_5)(lh.lingual\_6)  
4071 0.86957 (lh.inferiorparietal\_3)(lh.lateraloccipital\_7)  
4072 0.86957 (lh.inferiortemporal\_3)(lh.inferiortemporal\_5)  
4073 0.86957 (lh.insula\_1)(lh.superiorparietal\_5)(lh.supramarginal\_1)  
4074 0.86957 (lh.insula\_2)(lh.insula\_3)  
4075 0.86957 (lh.lateraloccipital\_11)(lh.lateraloccipital\_3)(lh.lateraloccipital\_6)  
4076 0.86957 (lh.lateraloccipital\_6)(lh.lingual\_1)(lh.lingual\_4)(lh.pericalcarine\_3)  
4077 0.86957 (lh.lateraloccipital\_7)(lh.lingual\_6)  
4078 0.86957 (lh.lateralorbitofrontal\_4)(lh.lateralorbitofrontal\_6)(lh.lateralorbitofrontal\_7)(lh.rostralmiddlefrontal\_12)(lh.rostralmiddlefrontal\_9)  
4079 0.86957 (lh.lateralorbitofrontal\_7)(lh.parstriangularis\_3)(lh.rostralmiddlefrontal\_6)  
4080 0.86957 (lh.lateralorbitofrontal\_7)(lh.superiorfrontal\_3)  
4081 0.86957 (lh.lingual\_6)(lh.lingual\_7)(lh.lingual\_8)  
4082 0.86957 (lh.medialorbitofrontal\_2)(lh.rostralmiddlefrontal\_12)(lh.rostralmiddlefrontal\_9)(lh.superiorfrontal\_1)  
4083 0.86957 (lh.paracentral\_1)(lh.paracentral\_4)(lh.paracentral\_5)  
4084 0.86957 (lh.paracentral\_4)(lh.precentral\_4)  
4085 0.86957 (lh.parstriangularis\_3)(lh.rostralanteriorcingulate\_1)(lh.rostralmiddlefrontal\_4)  
4086 0.86957 (lh.postcentral\_8)(lh.precentral\_11)(lh.precentral\_4)  
4087 0.86957 (lh.posteriorcingulate\_3)(lh.superiorfrontal\_8)  
4088 0.86957 (lh.rostralanteriorcingulate\_2)(lh.rostralmiddlefrontal\_1)  
4089 0.86957 (lh.rostralmiddlefrontal\_1)(lh.superiorfrontal\_4)  
4090 0.86957 (lh.rostralmiddlefrontal\_8)(lh.superiorfrontal\_10)(lh.superiorfrontal\_4)  
4091 0.86957 (lh.rostralmiddlefrontal\_8)(lh.superiorfrontal\_5)  
4092 0.86957 (lh.superiorfrontal\_10)(lh.superiorfrontal\_11)(lh.superiorfrontal\_4)(lh.superiorfrontal\_6)(lh.superiorfrontal\_7)  
4093 0.86957 (lh.superiorfrontal\_10)(lh.superiorfrontal\_11)(lh.superiorfrontal\_7)(lh.superiorfrontal\_8)(lh.superiorfrontal\_9)  
4094 0.86957 (lh.superiorfrontal\_6)(lh.superiorfrontal\_9)  
4095 0.86957 (lh.superiorparietal\_6)(lh.superiorparietal\_7)  
4096 0.86957 (rh.caudalmiddlefrontal\_2)(rh.caudalmiddlefrontal\_4)(rh.caudalmiddlefrontal\_5)  
4097 0.86957 (rh.fusiform\_1)(rh.lateraloccipital\_5)  
4098 0.86957 (rh.fusiform\_3)(rh.fusiform\_5)(rh.lateraloccipital\_10)  
4099 0.86957 (rh.fusiform\_3)(rh.middletemporal\_1)  
4100 0.86957 (rh.inferiorparietal\_11)(rh.lateraloccipital\_10)(rh.lateraloccipital\_8)

4101 0.86957 (rh.inferiortemporal\_4)(rh.inferiortemporal\_5)(rh.middletemporal\_4)  
4102 0.86957 (rh.insula\_2)(rh.insula\_4)(rh.insula\_5)  
4103 0.86957 (rh.insula\_3)(rh.precentral\_5)(rh.precentral\_6)  
4104 0.86957 (rh.insula\_7)(rh.parstriangularis\_1)(rh.rostralmiddlefrontal\_3)  
4105 0.86957 (rh.insula\_7)(rh.rostralmiddlefrontal\_8)  
4106 0.86957 (rh.lateraloccipital\_1)(rh.pericalcarine\_3)  
4107 0.86957 (rh.lateraloccipital\_3)(rh.lateraloccipital\_4)(rh.pericalcarine\_2)  
4108 0.86957 (rh.lateraloccipital\_3)(rh.precuneus\_1)  
4109 0.86957 (rh.lateraloccipital\_5)(rh.pericalcarine\_3)  
4110 0.86957 (rh.lateraloccipital\_8)(rh.lingual\_2)(rh.pericalcarine\_1)  
4111 0.86957 (rh.lateralorbitofrontal\_2)(rh.lateralorbitofrontal\_4)(rh.lateralorbitofrontal\_7)  
4112 0.86957 (rh.lateralorbitofrontal\_6)(rh.lateralorbitofrontal\_7)(rh.medialorbitofrontal\_2)(rh.rostralmiddlefrontal\_13)  
4113 0.86957 (rh.lateralorbitofrontal\_6)(rh.parstriangularis\_3)(rh.parstriangularis\_4)  
4114 0.86957 (rh.lateralorbitofrontal\_6)(rh.rostralmiddlefrontal\_12)(rh.rostralmiddlefrontal\_8)  
4115 0.86957 (rh.medialorbitofrontal\_2)(rh.rostralmiddlefrontal\_11)(rh.rostralmiddlefrontal\_12)  
4116 0.86957 (rh.parstriangularis\_1)(rh.rostralmiddlefrontal\_3)(rh.rostralmiddlefrontal\_5)  
4117 0.86957 (rh.parstriangularis\_3)(rh.rostralmiddlefrontal\_12)  
4118 0.86957 (rh.postcentral\_5)(rh.precentral\_5)  
4119 0.86957 (rh.posteriorcingulate\_4)(rh.superiorparietal\_1)  
4120 0.86957 (rh.precuneus\_4)(rh.precuneus\_7)(rh.superiorparietal\_1)(rh.superiorparietal\_7)  
4121 0.86957 (rh.precuneus\_4)(rh.superiorparietal\_9)  
4122 0.86957 (rh.rostralmiddlefrontal\_1)(rh.rostralmiddlefrontal\_5)(rh.rostralmiddlefrontal\_8)  
4123 0.86957 (rh.superiorfrontal\_13)(rh.superiorfrontal\_5)(rh.superiorfrontal\_9)  
4124 0.86957 (rh.supramarginal\_4)(rh.supramarginal\_8)  
4125 0.86957 (Right-Accumbens-area)(Right-Amygdala)(Right-Hippocampus)(Right-Pallidum)(Right-Thalamus-Proper)  
4126 0.86957 (Right-Accumbens-area)(Right-Amygdala)(Right-Hippocampus)(Right-Pallidum)  
4127 0.86957 (Right-Accumbens-area)(Right-Amygdala)(Right-Hippocampus)(Right-Thalamus-Proper)  
4128 0.86957 (Right-Accumbens-area)(Right-Amygdala)(Right-Hippocampus)  
4129 0.86957 (Right-Amygdala)(rh.insula\_4)(rh.insula\_6)  
4130 0.86957 (Right-Amygdala)(Right-Putamen)(rh.insula\_4)(rh.insula\_6)  
4131 0.86957 (Right-Caudate)(rh.lateralorbitofrontal\_2)(rh.lateralorbitofrontal\_6)  
4132 0.86957 (Right-Caudate)(rh.lateralorbitofrontal\_7)(rh.medialorbitofrontal\_3)  
4133 0.86957 (Right-Caudate)(rh.rostralmiddlefrontal\_5)(rh.rostralmiddlefrontal\_8)  
4134 0.86957 (Right-Caudate)(rh.supramarginal\_8)(rh.supramarginal\_9)  
4135 0.86957 (Right-Caudate)(Right-Putamen)(rh.lateralorbitofrontal\_2)(rh.lateralorbitofrontal\_6)  
4136 0.86957 (Right-Caudate)(Right-Putamen)(rh.medialorbitofrontal\_2)(rh.superiorfrontal\_2)  
4137 0.86957 (Right-Hippocampus)(rh.bankssts\_2)(rh.superiortemporal\_1)(rh.superiortemporal\_3)  
4138 0.86957 (Right-Hippocampus)(rh.precuneus\_4)(rh.precuneus\_7)  
4139 0.86957 (Right-Pallidum)(rh.precentral\_5)  
4140 0.86957 (Right-Pallidum)(rh.precentral\_7)  
4141 0.86957 (Right-Pallidum)(Right-Putamen)(rh.precentral\_5)  
4142 0.86957 (Right-Pallidum)(Right-Putamen)(rh.precentral\_7)  
4143 0.86957 (Right-Putamen)(rh.insula\_2)(rh.insula\_4)(rh.insula\_5)  
4144 0.86957 (Right-Putamen)(rh.insula\_7)(rh.parsopercularis\_4)(rh.rostralmiddlefrontal\_3)  
4145 0.86957 (Right-Putamen)(rh.insula\_7)(rh.rostralmiddlefrontal\_8)  
4146 0.86957 (Right-Putamen)(rh.lateralorbitofrontal\_2)(rh.lateralorbitofrontal\_7)(rh.parstriangularis\_1)(rh.rostralmiddlefrontal\_12)  
4147 0.86957 (Right-Putamen)(rh.precentral\_12)  
4148 0.86957 (Right-Putamen)(rh.rostralmiddlefrontal\_1)(rh.rostralmiddlefrontal\_5)  
4149 0.86957 (Right-Putamen)(rh.rostralmiddlefrontal\_10)(rh.rostralmiddlefrontal\_8)  
4150 0.86957 (Right-Putamen)(rh.rostralmiddlefrontal\_12)(rh.rostralmiddlefrontal\_5)

4151 0.86957 (Right-Thalamus-Proper)(rh.insula\_1)(rh.precentral\_11)  
4152 0.86715 (Left-Caudate)(Left-Putamen)(lh.caudalanteriorcingulate\_2)(lh.superiorfrontal\_4)  
4153 0.86715 (Left-Caudate)(Left-Putamen)(lh.insula\_1)(lh.precentral\_11)(lh.precentral\_7)  
4154 0.86715 (Left-Caudate)(Left-Putamen)(lh.lateralorbitofrontal\_7)(lh.rostralanteriorcingulate\_1)(lh.rostralmiddlefrontal\_12)  
4155 0.86715 (Left-Caudate)(Left-Putamen)(lh.medialorbitofrontal\_4)(lh.rostralanteriorcingulate\_1)  
4156 0.86715 (Left-Caudate)(Left-Putamen)(lh.rostralanteriorcingulate\_1)(lh.rostralmiddlefrontal\_9)(lh.superiorfrontal\_4)  
4157 0.86715 (Left-Caudate)(Left-Putamen)(lh.superiorfrontal\_11)(lh.superiorfrontal\_14)  
4158 0.86715 (Left-Caudate)(Left-Thalamus-Proper)(lh.isthmuscingulate\_1)  
4159 0.86715 (Left-Caudate)(lh.caudalanteriorcingulate\_2)(lh.rostralanteriorcingulate\_2)(lh.superiorfrontal\_8)  
4160 0.86715 (Left-Caudate)(lh.caudalmiddlefrontal\_3)(lh.parstriangularis\_3)  
4161 0.86715 (Left-Caudate)(lh.lateralorbitofrontal\_4)(lh.parstriangularis\_3)(lh.rostralmiddlefrontal\_9)  
4162 0.86715 (Left-Caudate)(lh.lateralorbitofrontal\_7)(lh.medialorbitofrontal\_5)  
4163 0.86715 (Left-Caudate)(lh.paracentral\_5)(lh.posteriorcingulate\_3)  
4164 0.86715 (Left-Caudate)(lh.parsopercularis\_3)(lh.parstriangularis\_3)(lh.rostralmiddlefrontal\_1)  
4165 0.86715 (Left-Caudate)(lh.rostralmiddlefrontal\_4)(lh.superiorfrontal\_10)(lh.superiorfrontal\_11)  
4166 0.86715 (Left-Hippocampus)(Left-Putamen)(Left-Thalamus-Proper)(lh.insula\_1)(lh.insula\_2)  
4167 0.86715 (Left-Hippocampus)(Left-Thalamus-Proper)(lh.insula\_1)(lh.insula\_2)  
4168 0.86715 (Left-Hippocampus)(lh.parahippocampal\_1)(lh.parahippocampal\_2)  
4169 0.86715 (Left-Hippocampus)(lh.supramarginal\_1)  
4170 0.86715 (Left-Pallidum)(Left-Putamen)(Left-Thalamus-Proper)(lh.insula\_1)(lh.precentral\_11)  
4171 0.86715 (Left-Pallidum)(Left-Thalamus-Proper)(lh.insula\_1)(lh.precentral\_11)  
4172 0.86715 (Left-Putamen)(Left-Thalamus-Proper)(lh.insula\_1)(lh.precentral\_11)(lh.precentral\_7)  
4173 0.86715 (Left-Putamen)(lh.caudalanteriorcingulate\_2)(lh.caudalmiddlefrontal\_5)  
4174 0.86715 (Left-Putamen)(lh.caudalmiddlefrontal\_3)(lh.insula\_6)(lh.rostralmiddlefrontal\_4)  
4175 0.86715 (Left-Putamen)(lh.caudalmiddlefrontal\_3)(lh.rostralmiddlefrontal\_9)  
4176 0.86715 (Left-Putamen)(lh.caudalmiddlefrontal\_4)(lh.caudalmiddlefrontal\_6)(lh.precentral\_9)  
4177 0.86715 (Left-Putamen)(lh.insula\_1)(lh.supramarginal\_9)  
4178 0.86715 (Left-Putamen)(lh.insula\_6)(lh.parsopercularis\_1)(lh.parsopercularis\_3)(lh.parstriangularis\_3)  
4179 0.86715 (Left-Putamen)(lh.medialorbitofrontal\_2)(lh.superiorfrontal\_4)  
4180 0.86715 (Left-Putamen)(lh.medialorbitofrontal\_4)(lh.rostralanteriorcingulate\_1)  
4181 0.86715 (Left-Putamen)(lh.paracentral\_5)  
4182 0.86715 (Left-Putamen)(lh.rostralmiddlefrontal\_1)(lh.rostralmiddlefrontal\_12)  
4183 0.86715 (Left-Thalamus-Proper)(lh.insula\_1)(lh.precentral\_11)(lh.precentral\_7)  
4184 0.86715 (Left-Thalamus-Proper)(lh.precentral\_6)  
4185 0.86715 (lh.bankssts\_1)(lh.superiortemporal\_6)  
4186 0.86715 (lh.caudalmiddlefrontal\_3)(lh.rostralmiddlefrontal\_1)(lh.rostralmiddlefrontal\_9)  
4187 0.86715 (lh.cuneus\_1)(lh.precuneus\_9)(lh.superiorparietal\_12)  
4188 0.86715 (lh.fusiform\_1)(lh.inferiortemporal\_8)  
4189 0.86715 (lh.fusiform\_4)(lh.fusiform\_5)(lh.lateraloccipital\_9)  
4190 0.86715 (lh.fusiform\_7)(lh.inferiortemporal\_7)  
4191 0.86715 (lh.inferiorparietal\_10)(lh.inferiorparietal\_6)  
4192 0.86715 (lh.inferiorparietal\_3)(lh.inferiorparietal\_4)  
4193 0.86715 (lh.insula\_1)(lh.postcentral\_8)(lh.precentral\_7)  
4194 0.86715 (lh.insula\_1)(lh.supramarginal\_1)(lh.supramarginal\_6)  
4195 0.86715 (lh.insula\_6)(lh.parsopercularis\_1)(lh.parsopercularis\_3)(lh.parstriangularis\_3)(lh.rostralmiddlefrontal\_1)  
4196 0.86715 (lh.insula\_6)(lh.parsopercularis\_3)(lh.parsopercularis\_4)  
4197 0.86715 (lh.lateralorbitofrontal\_4)(lh.lateralorbitofrontal\_7)(lh.parstriangularis\_3)(lh.rostralmiddlefrontal\_12)(lh.rostralmiddlefrontal\_9)  
4198 0.86715 (lh.lateralorbitofrontal\_7)(lh.medialorbitofrontal\_2)(lh.rostralanteriorcingulate\_1)(lh.rostralmiddlefrontal\_12)(lh.rostralmiddlefrontal\_9)  
4199 0.86715 (lh.lateralorbitofrontal\_7)(lh.rostralmiddlefrontal\_12)(lh.rostralmiddlefrontal\_6)  
4200 0.86715 (lh.lingual\_1)(lh.lingual\_3)(lh.lingual\_4)(lh.pericalcarine\_3)

4201 0.86715 (lh.medialorbitofrontal\_2)(lh.rostralanteriorcingulate\_1)(lh.rostralmiddlefrontal\_9)(lh.superiorfrontal\_4)  
4202 0.86715 (lh.paracentral\_1)(lh.superiorfrontal\_16)  
4203 0.86715 (lh.paracentral\_4)(lh.paracentral\_5)(lh.precentral\_4)  
4204 0.86715 (lh.paracentral\_5)(lh.precentral\_6)  
4205 0.86715 (lh.paracentral\_5)(lh.superiorfrontal\_14)(lh.superiorfrontal\_8)  
4206 0.86715 (lh.parstriangularis\_2)(lh.rostralmiddlefrontal\_6)  
4207 0.86715 (lh.parstriangularis\_3)(lh.rostralanteriorcingulate\_1)(lh.rostralmiddlefrontal\_1)(lh.rostralmiddlefrontal\_9)  
4208 0.86715 (lh.parstriangularis\_3)(lh.rostralanteriorcingulate\_1)(lh.rostralmiddlefrontal\_1)  
4209 0.86715 (lh.postcentral\_12)(lh.precentral\_14)(lh.precentral\_16)  
4210 0.86715 (lh.postcentral\_14)(lh.precentral\_11)  
4211 0.86715 (lh.precentral\_4)(lh.superiorfrontal\_12)  
4212 0.86715 (lh.precuneus\_9)(lh.superiorparietal\_11)(lh.superiorparietal\_5)  
4213 0.86715 (lh.rostralmiddlefrontal\_1)(lh.rostralmiddlefrontal\_2)(lh.rostralmiddlefrontal\_4)  
4214 0.86715 (lh.rostralmiddlefrontal\_12)(lh.rostralmiddlefrontal\_4)  
4215 0.86715 (lh.superiorfrontal\_14)(lh.superiorfrontal\_16)(lh.superiorfrontal\_17)  
4216 0.86715 (lh.superiorfrontal\_14)(lh.superiorfrontal\_4)(lh.superiorfrontal\_7)(lh.superiorfrontal\_8)  
4217 0.86715 (lh.superiorfrontal\_14)(lh.superiorfrontal\_4)(lh.superiorfrontal\_7)  
4218 0.86715 (lh.superiorfrontal\_6)(lh.superiorfrontal\_7)(lh.superiorfrontal\_9)  
4219 0.86715 (rh.bankssts\_1)(rh.inferiortemporal\_4)(rh.middletemporal\_4)  
4220 0.86715 (rh.caudalanteriorcingulate\_2)(rh.rostralanteriorcingulate\_2)  
4221 0.86715 (rh.caudalmiddlefrontal\_1)(rh.caudalmiddlefrontal\_2)(rh.caudalmiddlefrontal\_3)  
4222 0.86715 (rh.cuneus\_3)(rh.superiorparietal\_11)  
4223 0.86715 (rh.cuneus\_4)(rh.lateraloccipital\_1)(rh.pericalcarine\_2)  
4224 0.86715 (rh.fusiform\_1)(rh.pericalcarine\_3)  
4225 0.86715 (rh.fusiform\_3)(rh.fusiform\_4)(rh.inferiortemporal\_7)  
4226 0.86715 (rh.inferiorparietal\_1)(rh.superiorparietal\_10)  
4227 0.86715 (rh.inferiorparietal\_11)(rh.inferiorparietal\_12)(rh.lateraloccipital\_4)  
4228 0.86715 (rh.inferiorparietal\_12)(rh.lateraloccipital\_4)(rh.pericalcarine\_1)  
4229 0.86715 (rh.insula\_1)(rh.insula\_2)(rh.insula\_3)(rh.supramarginal\_9)  
4230 0.86715 (rh.insula\_3)(rh.postcentral\_1)  
4231 0.86715 (rh.lateraloccipital\_5)(rh.lingual\_2)  
4232 0.86715 (rh.lateralorbitofrontal\_6)(rh.lateralorbitofrontal\_7)(rh.medialorbitofrontal\_2)(rh.rostralmiddlefrontal\_12)  
4233 0.86715 (rh.lateralorbitofrontal\_6)(rh.parsorbitalis\_2)(rh.parstriangularis\_1)  
4234 0.86715 (rh.lateralorbitofrontal\_6)(rh.rostralmiddlefrontal\_3)  
4235 0.86715 (rh.lateralorbitofrontal\_7)(rh.parstriangularis\_1)(rh.rostralmiddlefrontal\_12)(rh.rostralmiddlefrontal\_8)  
4236 0.86715 (rh.lateralorbitofrontal\_7)(rh.rostralmiddlefrontal\_12)(rh.rostralmiddlefrontal\_13)  
4237 0.86715 (rh.lingual\_6)(rh.lingual\_7)  
4238 0.86715 (rh.paracentral\_4)(rh.paracentral\_6)  
4239 0.86715 (rh.parsopercularis\_2)(rh.parsopercularis\_4)(rh.rostralmiddlefrontal\_3)  
4240 0.86715 (rh.parsorbitalis\_2)(rh.rostralmiddlefrontal\_7)  
4241 0.86715 (rh.parstriangularis\_1)(rh.rostralmiddlefrontal\_3)(rh.rostralmiddlefrontal\_5)(rh.rostralmiddlefrontal\_8)  
4242 0.86715 (rh.parstriangularis\_2)(rh.parstriangularis\_3)(rh.parstriangularis\_4)  
4243 0.86715 (rh.precentral\_13)(rh.superiorfrontal\_13)  
4244 0.86715 (rh.precuneus\_1)(rh.precuneus\_2)  
4245 0.86715 (rh.precuneus\_10)(rh.precuneus\_7)(rh.superiorparietal\_1)(rh.superiorparietal\_7)  
4246 0.86715 (rh.precuneus\_10)(rh.precuneus\_7)(rh.superiorparietal\_8)  
4247 0.86715 (rh.rostralmiddlefrontal\_5)(rh.superiorfrontal\_7)  
4248 0.86715 (rh.rostralmiddlefrontal\_8)(rh.superiorfrontal\_2)(rh.superiorfrontal\_7)  
4249 0.86715 (rh.superiorfrontal\_13)(rh.superiorfrontal\_7)(rh.superiorfrontal\_8)  
4250 0.86715 (rh.superiorfrontal\_2)(rh.superiorfrontal\_4)(rh.superiorfrontal\_5)(rh.superiorfrontal\_7)

4251 0.86715 (rh.superiorfrontal\_3)(rh.superiorfrontal\_4)(rh.superiorfrontal\_5)(rh.superiorfrontal\_6)  
4252 0.86715 (Right-Amygdala)(rh.fusiform\_8)  
4253 0.86715 (Right-Amygdala)(rh.insula\_4)(rh.insula\_5)  
4254 0.86715 (Right-Amygdala)(Right-Putamen)(rh.insula\_4)(rh.insula\_5)  
4255 0.86715 (Right-Caudate)(rh.caudalanteriorcingulate\_2)(rh.rostralanteriorcingulate\_2)  
4256 0.86715 (Right-Caudate)(rh.lateralorbitofrontal\_2)(rh.parstriangularis\_1)  
4257 0.86715 (Right-Caudate)(rh.lateralorbitofrontal\_6)(rh.parstriangularis\_1)  
4258 0.86715 (Right-Caudate)(rh.precentral\_10)  
4259 0.86715 (Right-Caudate)(Right-Thalamus-Proper)(rh.posteriorcingulate\_2)(rh.precentral\_13)  
4260 0.86715 (Right-Pallidum)(rh.insula\_2)  
4261 0.86715 (Right-Pallidum)(Right-Putamen)(rh.insula\_2)  
4262 0.86715 (Right-Pallidum)(Right-Putamen)(Right-Thalamus-Proper)(rh.insula\_2)  
4263 0.86715 (Right-Pallidum)(Right-Thalamus-Proper)(rh.insula\_2)  
4264 0.86715 (Right-Putamen)(rh.insula\_1)(rh.insula\_2)(rh.insula\_3)(rh.supramarginal\_9)  
4265 0.86715 (Right-Putamen)(rh.insula\_1)(rh.postcentral\_1)(rh.supramarginal\_9)  
4266 0.86715 (Right-Putamen)(rh.lateralorbitofrontal\_2)(rh.lateralorbitofrontal\_4)(rh.lateralorbitofrontal\_7)  
4267 0.86715 (Right-Putamen)(rh.rostralmiddlefrontal\_12)(rh.rostralmiddlefrontal\_3)(rh.rostralmiddlefrontal\_8)  
4268 0.86715 (Right-Putamen)(rh.supramarginal\_1)(rh.supramarginal\_8)(rh.supramarginal\_9)  
4269 0.86715 (Right-Putamen)(Right-Thalamus-Proper)(rh.insula\_1)(rh.precentral\_11)  
4270 0.86715 (Right-Thalamus-Proper)(rh.posteriorcingulate\_2)(rh.precentral\_13)  
4271 0.86473 (Left-Caudate)(Left-Pallidum)(Left-Putamen)(lh.precentral\_9)  
4272 0.86473 (Left-Caudate)(Left-Pallidum)(lh.precentral\_9)  
4273 0.86473 (Left-Caudate)(Left-Putamen)(lh.superiorfrontal\_10)(lh.superiorfrontal\_11)  
4274 0.86473 (Left-Caudate)(lh.caudalmiddlefrontal\_3)(lh.rostralmiddlefrontal\_9)  
4275 0.86473 (Left-Caudate)(lh.lateralorbitofrontal\_4)(lh.rostralmiddlefrontal\_12)  
4276 0.86473 (Left-Caudate)(lh.parstriangularis\_3)(lh.rostralanteriorcingulate\_1)(lh.rostralmiddlefrontal\_12)(lh.rostralmiddlefrontal\_9)  
4277 0.86473 (Left-Caudate)(lh.precentral\_6)(lh.precentral\_7)  
4278 0.86473 (Left-Caudate)(lh.rostralanteriorcingulate\_2)(lh.superiorfrontal\_11)(lh.superiorfrontal\_4)  
4279 0.86473 (Left-Caudate)(lh.superiorfrontal\_11)(lh.superiorfrontal\_14)(lh.superiorfrontal\_4)  
4280 0.86473 (Left-Hippocampus)(lh.fusiform\_5)(lh.lateraloccipital\_9)(lh.lingual\_8)  
4281 0.86473 (Left-Putamen)(Left-Thalamus-Proper)(lh.postcentral\_8)(lh.precentral\_7)  
4282 0.86473 (Left-Putamen)(lh.caudalanteriorcingulate\_2)(lh.superiorfrontal\_12)(lh.superiorfrontal\_14)  
4283 0.86473 (Left-Putamen)(lh.caudalmiddlefrontal\_3)(lh.insula\_6)(lh.parstriangularis\_3)  
4284 0.86473 (Left-Putamen)(lh.caudalmiddlefrontal\_4)(lh.superiorfrontal\_12)  
4285 0.86473 (Left-Putamen)(lh.rostralanteriorcingulate\_1)(lh.rostralanteriorcingulate\_2)(lh.rostralmiddlefrontal\_4)  
4286 0.86473 (Left-Putamen)(lh.rostralanteriorcingulate\_1)(lh.rostralmiddlefrontal\_1)  
4287 0.86473 (Left-Putamen)(lh.rostralanteriorcingulate\_1)(lh.rostralmiddlefrontal\_12)(lh.rostralmiddlefrontal\_9)(lh.superiorfrontal\_3)  
4288 0.86473 (Left-Putamen)(lh.rostralmiddlefrontal\_1)(lh.rostralmiddlefrontal\_12)(lh.rostralmiddlefrontal\_9)  
4289 0.86473 (lh.caudalanteriorcingulate\_2)(lh.superiorfrontal\_10)(lh.superiorfrontal\_11)(lh.superiorfrontal\_4)(lh.superiorfrontal\_8)  
4290 0.86473 (lh.caudalmiddlefrontal\_1)(lh.caudalmiddlefrontal\_3)(lh.rostralmiddlefrontal\_1)  
4291 0.86473 (lh.caudalmiddlefrontal\_3)(lh.insula\_6)(lh.parsopercularis\_3)  
4292 0.86473 (lh.caudalmiddlefrontal\_5)(lh.caudalmiddlefrontal\_6)(lh.precentral\_9)  
4293 0.86473 (lh.fusiform\_2)(lh.fusiform\_3)(lh.lateraloccipital\_9)  
4294 0.86473 (lh.fusiform\_2)(lh.fusiform\_5)  
4295 0.86473 (lh.fusiform\_2)(lh.lateraloccipital\_11)(lh.pericalcarine\_3)  
4296 0.86473 (lh.fusiform\_2)(lh.lingual\_6)(lh.pericalcarine\_3)  
4297 0.86473 (lh.inferiorparietal\_4)(lh.inferiorparietal\_8)  
4298 0.86473 (lh.inferiorparietal\_9)(lh.supramarginal\_6)  
4299 0.86473 (lh.insula\_6)(lh.lateralorbitofrontal\_6)(lh.parstriangularis\_3)  
4300 0.86473 (lh.insula\_6)(lh.parsopercularis\_1)(lh.parsopercularis\_4)

4301 0.86473 (lh.lateraloccipital\_11)(lh.lateraloccipital\_3)(lh.lingual\_1)  
4302 0.86473 (lh.lateraloccipital\_2)(lh.pericalcarine\_1)(lh.pericalcarine\_3)  
4303 0.86473 (lh.lateralorbitofrontal\_4)(lh.parstriangularis\_3)(lh.rostralanteriorcingulate\_1)  
4304 0.86473 (lh.lateralorbitofrontal\_6)(lh.lateralorbitofrontal\_7)(lh.parstriangularis\_3)(lh.rostralmiddlefrontal\_6)  
4305 0.86473 (lh.lateralorbitofrontal\_6)(lh.parstriangularis\_2)(lh.rostralmiddlefrontal\_9)  
4306 0.86473 (lh.lateralorbitofrontal\_7)(lh.medialorbitofrontal\_2)(lh.superiorfrontal\_3)  
4307 0.86473 (lh.lateralorbitofrontal\_7)(lh.rostralmiddlefrontal\_6)(lh.rostralmiddlefrontal\_9)  
4308 0.86473 (lh.lingual\_1)(lh.lingual\_3)(lh.pericalcarine\_2)  
4309 0.86473 (lh.paracentral\_4)(lh.superiorfrontal\_16)(lh.superiorfrontal\_18)  
4310 0.86473 (lh.parahippocampal\_2)(lh.parahippocampal\_3)  
4311 0.86473 (lh.parsopercularis\_1)(lh.parstriangularis\_2)(lh.parstriangularis\_3)  
4312 0.86473 (lh.parsopercularis\_1)(lh.parstriangularis\_2)  
4313 0.86473 (lh.postcentral\_8)(lh.superiorparietal\_3)  
4314 0.86473 (lh.posteriorcingulate\_1)(lh.superiorfrontal\_14)  
4315 0.86473 (lh.precentral\_10)(lh.precentral\_11)  
4316 0.86473 (lh.precentral\_11)(lh.precentral\_5)  
4317 0.86473 (lh.precentral\_13)(lh.precentral\_9)  
4318 0.86473 (lh.precuneus\_6)(lh.precuneus\_9)(lh.superiorparietal\_5)  
4319 0.86473 (lh.rostralanteriorcingulate\_2)(lh.superiorfrontal\_10)(lh.superiorfrontal\_8)  
4320 0.86473 (lh.rostralmiddlefrontal\_12)(lh.rostralmiddlefrontal\_4)(lh.rostralmiddlefrontal\_9)  
4321 0.86473 (lh.rostralmiddlefrontal\_8)(lh.superiorfrontal\_4)(lh.superiorfrontal\_5)  
4322 0.86473 (lh.superiorfrontal\_11)(lh.superiorfrontal\_14)(lh.superiorfrontal\_7)(lh.superiorfrontal\_8)(lh.superiorfrontal\_9)  
4323 0.86473 (lh.superiorfrontal\_15)(lh.superiorfrontal\_17)(lh.superiorfrontal\_18)  
4324 0.86473 (rh.bankssts\_1)(rh.middletemporal\_1)(rh.middletemporal\_2)  
4325 0.86473 (rh.caudalanteriorcingulate\_1)(rh.caudalanteriorcingulate\_3)  
4326 0.86473 (rh.caudalmiddlefrontal\_4)(rh.insula\_3)(rh.insula\_7)(rh.parsopercularis\_4)  
4327 0.86473 (rh.caudalmiddlefrontal\_4)(rh.rostralmiddlefrontal\_8)  
4328 0.86473 (rh.caudalmiddlefrontal\_4)(rh.superiorfrontal\_11)(rh.superiorfrontal\_7)  
4329 0.86473 (rh.cuneus\_4)(rh.lateraloccipital\_3)  
4330 0.86473 (rh.fusiform\_1)(rh.fusiform\_2)(rh.lateraloccipital\_8)(rh.lingual\_5)  
4331 0.86473 (rh.fusiform\_1)(rh.lateraloccipital\_4)(rh.pericalcarine\_1)  
4332 0.86473 (rh.fusiform\_1)(rh.lingual\_6)  
4333 0.86473 (rh.inferiorparietal\_1)(rh.inferiorparietal\_4)(rh.inferiorparietal\_6)  
4334 0.86473 (rh.inferiortemporal\_3)(rh.inferiortemporal\_4)(rh.middletemporal\_6)  
4335 0.86473 (rh.inferiortemporal\_6)(rh.lateraloccipital\_10)  
4336 0.86473 (rh.inferiortemporal\_6)(rh.middletemporal\_1)(rh.middletemporal\_2)  
4337 0.86473 (rh.insula\_7)(rh.lateralorbitofrontal\_2)(rh.parstriangularis\_1)  
4338 0.86473 (rh.isthmuscingulate\_1)(rh.superiorparietal\_1)  
4339 0.86473 (rh.lateralorbitofrontal\_6)(rh.rostralmiddlefrontal\_12)(rh.rostralmiddlefrontal\_13)  
4340 0.86473 (rh.lingual\_2)(rh.lingual\_4)(rh.pericalcarine\_3)  
4341 0.86473 (rh.middletemporal\_8)(rh.superiortemporal\_6)  
4342 0.86473 (rh.parsorbitalis\_2)(rh.parstriangularis\_1)(rh.rostralmiddlefrontal\_12)  
4343 0.86473 (rh.parstriangularis\_1)(rh.parstriangularis\_4)(rh.rostralmiddlefrontal\_12)(rh.rostralmiddlefrontal\_3)  
4344 0.86473 (rh.precentral\_11)(rh.precentral\_15)  
4345 0.86473 (rh.superiorparietal\_1)(rh.superiorparietal\_11)  
4346 0.86473 (rh.superiorparietal\_6)(rh.superiorparietal\_7)  
4347 0.86473 (Right-Caudate)(rh.caudalanteriorcingulate\_1)(rh.caudalanteriorcingulate\_3)  
4348 0.86473 (Right-Caudate)(rh.lateralorbitofrontal\_6)(rh.medialorbitofrontal\_2)  
4349 0.86473 (Right-Caudate)(rh.medialorbitofrontal\_2)(rh.rostralmiddlefrontal\_12)  
4350 0.86473 (Right-Caudate)(Right-Putamen)(rh.caudalmiddlefrontal\_1)(rh.caudalmiddlefrontal\_4)

4351 0.86473 (Right-Caudate)(Right-Putamen)(rh.parsopercularis\_4)(rh.parstriangularis\_1)  
4352 0.86473 (Right-Caudate)(Right-Putamen)(rh.precentral\_10)  
4353 0.86473 (Right-Caudate)(Right-Putamen)(Right-Thalamus-Proprius)(rh.insula\_1)(rh.insula\_2)  
4354 0.86473 (Right-Caudate)(Right-Thalamus-Proprius)(rh.insula\_1)(rh.insula\_2)  
4355 0.86473 (Right-Hippocampus)(rh.fusiform\_6)  
4356 0.86473 (Right-Hippocampus)(rh.insula\_1)(rh.insula\_2)  
4357 0.86473 (Right-Hippocampus)(Right-Putamen)(rh.insula\_1)(rh.insula\_2)  
4358 0.86473 (Right-Putamen)(rh.caudalmiddlefrontal\_4)(rh.insula\_3)(rh.insula\_7)(rh.parsopercularis\_4)  
4359 0.86473 (Right-Putamen)(rh.caudalmiddlefrontal\_4)(rh.rostralmiddlefrontal\_8)  
4360 0.86473 (Right-Putamen)(rh.medialorbitofrontal\_2)(rh.rostralmiddlefrontal\_12)(rh.superiorfrontal\_2)  
4361 0.86473 (Right-Putamen)(rh.postcentral\_10)  
4362 0.86473 (Right-Putamen)(rh.rostralmiddlefrontal\_12)(rh.rostralmiddlefrontal\_5)(rh.rostralmiddlefrontal\_8)  
4363 0.86232 (Left-Accumbens-area)(lh.lateralorbitofrontal\_2)  
4364 0.86232 (Left-Caudate)(Left-Pallidum)(Left-Thalamus-Proprius)(lh.posteriorcingulate\_3)  
4365 0.86232 (Left-Caudate)(Left-Putamen)(lh.lateralorbitofrontal\_2)(lh.lateralorbitofrontal\_7)(lh.medialorbitofrontal\_2)  
4366 0.86232 (Left-Caudate)(Left-Putamen)(lh.lateralorbitofrontal\_6)(lh.rostralmiddlefrontal\_12)  
4367 0.86232 (Left-Caudate)(lh.caudalanteriorcingulate\_2)(lh.caudalmiddlefrontal\_3)(lh.superiorfrontal\_11)(lh.superiorfrontal\_12)  
4368 0.86232 (Left-Caudate)(lh.lateralorbitofrontal\_6)(lh.lateralorbitofrontal\_7)(lh.parstriangularis\_3)  
4369 0.86232 (Left-Caudate)(lh.lateralorbitofrontal\_7)(lh.medialorbitofrontal\_2)(lh.rostralanteriorcingulate\_1)(lh.rostralmiddlefrontal\_12)  
4370 0.86232 (Left-Caudate)(lh.rostralanteriorcingulate\_1)(lh.rostralmiddlefrontal\_1)(lh.rostralmiddlefrontal\_9)  
4371 0.86232 (Left-Caudate)(lh.rostralanteriorcingulate\_2)(lh.rostralmiddlefrontal\_4)(lh.rostralmiddlefrontal\_9)  
4372 0.86232 (Left-Caudate)(lh.superiorfrontal\_12)(lh.superiorfrontal\_4)  
4373 0.86232 (Left-Caudate)(lh.superiorfrontal\_3)(lh.superiorfrontal\_4)  
4374 0.86232 (Left-Hippocampus)(lh.bankssts\_3)(lh.fusiform\_7)  
4375 0.86232 (Left-Pallidum)(Left-Thalamus-Proprius)(lh.posteriorcingulate\_3)  
4376 0.86232 (Left-Putamen)(lh.caudalmiddlefrontal\_1)(lh.caudalmiddlefrontal\_4)(lh.caudalmiddlefrontal\_5)  
4377 0.86232 (Left-Putamen)(lh.caudalmiddlefrontal\_3)(lh.parstriangularis\_3)(lh.rostralmiddlefrontal\_1)  
4378 0.86232 (Left-Putamen)(lh.insula\_6)(lh.parsopercularis\_3)(lh.parstriangularis\_3)(lh.rostralmiddlefrontal\_1)  
4379 0.86232 (Left-Putamen)(lh.lateralorbitofrontal\_4)(lh.lateralorbitofrontal\_6)(lh.lateralorbitofrontal\_7)(lh.rostralmiddlefrontal\_12)(lh.rostralmiddlefrontal\_9)  
4380 0.86232 (Left-Putamen)(lh.lateralorbitofrontal\_7)(lh.parstriangularis\_3)(lh.rostralanteriorcingulate\_1)(lh.rostralmiddlefrontal\_12)  
4381 0.86232 (Left-Putamen)(lh.medialorbitofrontal\_2)(lh.parstriangularis\_3)(lh.rostralmiddlefrontal\_9)  
4382 0.86232 (Left-Putamen)(lh.postcentral\_8)(lh.precentral\_11)(lh.precentral\_7)  
4383 0.86232 (Left-Putamen)(lh.postcentral\_8)(lh.supramarginal\_9)  
4384 0.86232 (Left-Putamen)(lh.rostralanteriorcingulate\_1)(lh.rostralmiddlefrontal\_1)(lh.rostralmiddlefrontal\_9)  
4385 0.86232 (Left-Putamen)(lh.rostralanteriorcingulate\_2)(lh.superiorfrontal\_11)  
4386 0.86232 (Left-Putamen)(lh.rostralmiddlefrontal\_4)(lh.superiorfrontal\_10)  
4387 0.86232 (Left-Putamen)(lh.superiorfrontal\_10)(lh.superiorfrontal\_4)  
4388 0.86232 (Left-Thalamus-Proprius)(lh.precentral\_6)(lh.precentral\_7)  
4389 0.86232 (lh.bankssts\_3)(lh.fusiform\_4)  
4390 0.86232 (lh.caudalanteriorcingulate\_1)(lh.superiorfrontal\_11)  
4391 0.86232 (lh.caudalmiddlefrontal\_2)(lh.caudalmiddlefrontal\_3)(lh.caudalmiddlefrontal\_4)  
4392 0.86232 (lh.fusiform\_1)(lh.fusiform\_2)(lh.fusiform\_5)  
4393 0.86232 (lh.inferiorparietal\_4)(lh.inferiorparietal\_5)  
4394 0.86232 (lh.lateraloccipital\_10)(lh.lateraloccipital\_7)  
4395 0.86232 (lh.lateraloccipital\_6)(lh.lingual\_8)(lh.pericalcarine\_3)  
4396 0.86232 (lh.lateraloccipital\_7)(lh.lateraloccipital\_9)(lh.lingual\_8)  
4397 0.86232 (lh.lateraloccipital\_9)(lh.lingual\_6)  
4398 0.86232 (lh.lateralorbitofrontal\_1)(lh.lateralorbitofrontal\_4)  
4399 0.86232 (lh.lateralorbitofrontal\_6)(lh.parsorbitalis\_1)(lh.parstriangularis\_3)(lh.rostralmiddlefrontal\_6)  
4400 0.86232 (lh.lateralorbitofrontal\_6)(lh.parstriangularis\_2)(lh.parstriangularis\_3)(lh.rostralmiddlefrontal\_9)



4401 0.86232 (lh.lateralorbitofrontal\_7)(lh.medialorbitofrontal\_2)(lh.parstriangularis\_3)(lh.rostralmiddlefrontal\_12)  
4402 0.86232 (lh.lingual\_1)(lh.lingual\_8)(lh.pericalcarine\_3)  
4403 0.86232 (lh.medialorbitofrontal\_1)(lh.medialorbitofrontal\_2)(lh.superiorfrontal\_1)  
4404 0.86232 (lh.medialorbitofrontal\_2)(lh.parstriangularis\_3)(lh.rostralanteriorcingulate\_1)  
4405 0.86232 (lh.medialorbitofrontal\_2)(lh.parstriangularis\_3)(lh.rostralmiddlefrontal\_12)(lh.rostralmiddlefrontal\_9)  
4406 0.86232 (lh.parstriangularis\_3)(lh.rostralanteriorcingulate\_1)(lh.rostralmiddlefrontal\_4)(lh.rostralmiddlefrontal\_9)  
4407 0.86232 (lh.pericalcarine\_2)(lh.pericalcarine\_3)(lh.superiorparietal\_12)  
4408 0.86232 (lh.postcentral\_4)(lh.superiorparietal\_3)  
4409 0.86232 (lh.postcentral\_8)(lh.precentral\_6)(lh.precentral\_7)  
4410 0.86232 (lh.postcentral\_8)(lh.supramarginal\_4)(lh.supramarginal\_9)  
4411 0.86232 (lh.precentral\_4)(lh.superiorfrontal\_15)  
4412 0.86232 (lh.precuneus\_2)(lh.superiorparietal\_8)  
4413 0.86232 (lh.precuneus\_6)(lh.precuneus\_8)(lh.superiorparietal\_6)  
4414 0.86232 (lh.precuneus\_6)(lh.superiorparietal\_11)(lh.superiorparietal\_5)(lh.superiorparietal\_6)  
4415 0.86232 (lh.rostralanteriorcingulate\_1)(lh.rostralmiddlefrontal\_8)(lh.superiorfrontal\_4)  
4416 0.86232 (lh.rostralanteriorcingulate\_2)(lh.superiorfrontal\_11)(lh.superiorfrontal\_8)  
4417 0.86232 (lh.rostralmiddlefrontal\_12)(lh.rostralmiddlefrontal\_9)(lh.superiorfrontal\_4)  
4418 0.86232 (lh.rostralmiddlefrontal\_2)(lh.rostralmiddlefrontal\_3)(lh.rostralmiddlefrontal\_4)  
4419 0.86232 (lh.superiorfrontal\_10)(lh.superiorfrontal\_5)(lh.superiorfrontal\_6)  
4420 0.86232 (lh.superiorfrontal\_11)(lh.superiorfrontal\_4)(lh.superiorfrontal\_7)(lh.superiorfrontal\_8)(lh.superiorfrontal\_9)  
4421 0.86232 (rh.bankssts\_1)(rh.inferiortemporal\_4)(rh.inferiortemporal\_5)  
4422 0.86232 (rh.fusiform\_1)(rh.lateraloccipital\_8)(rh.lingual\_4)  
4423 0.86232 (rh.fusiform\_2)(rh.inferiorparietal\_10)(rh.lateraloccipital\_8)  
4424 0.86232 (rh.inferiorparietal\_12)(rh.inferiorparietal\_6)  
4425 0.86232 (rh.inferiorparietal\_12)(rh.lateraloccipital\_8)(rh.pericalcarine\_1)  
4426 0.86232 (rh.inferiortemporal\_2)(rh.inferiortemporal\_4)(rh.middletemporal\_7)  
4427 0.86232 (rh.inferiortemporal\_3)(rh.inferiortemporal\_4)(rh.inferiortemporal\_5)  
4428 0.86232 (rh.insula\_1)(rh.supramarginal\_7)(rh.supramarginal\_9)  
4429 0.86232 (rh.insula\_5)(rh.middletemporal\_9)(rh.superiortemporal\_10)  
4430 0.86232 (rh.lateraloccipital\_3)(rh.precuneus\_1)(rh.superiorparietal\_11)  
4431 0.86232 (rh.lateraloccipital\_4)(rh.lateraloccipital\_7)(rh.lingual\_2)(rh.pericalcarine\_3)  
4432 0.86232 (rh.lateralorbitofrontal\_2)(rh.parstriangularis\_1)(rh.rostralmiddlefrontal\_12)(rh.rostralmiddlefrontal\_8)  
4433 0.86232 (rh.lateralorbitofrontal\_6)(rh.parsorbitalis\_2)(rh.rostralmiddlefrontal\_13)  
4434 0.86232 (rh.pericalcarine\_1)(rh.precuneus\_1)  
4435 0.86232 (rh.precentral\_13)(rh.superiorparietal\_2)  
4436 0.86232 (rh.rostralanteriorcingulate\_2)(rh.rostralmiddlefrontal\_8)  
4437 0.86232 (rh.rostralmiddlefrontal\_12)(rh.rostralmiddlefrontal\_6)(rh.rostralmiddlefrontal\_8)  
4438 0.86232 (rh.rostralmiddlefrontal\_2)(rh.rostralmiddlefrontal\_3)(rh.rostralmiddlefrontal\_4)  
4439 0.86232 (rh.rostralmiddlefrontal\_5)(rh.rostralmiddlefrontal\_8)(rh.rostralmiddlefrontal\_9)  
4440 0.86232 (rh.superiorfrontal\_11)(rh.superiorfrontal\_12)(rh.superiorfrontal\_15)  
4441 0.86232 (rh.superiorfrontal\_11)(rh.superiorfrontal\_13)(rh.superiorfrontal\_5)  
4442 0.86232 (Right-Caudate)(rh.caudalmiddlefrontal\_4)(rh.rostralmiddlefrontal\_5)  
4443 0.86232 (Right-Caudate)(rh.caudalmiddlefrontal\_4)(rh.superiorfrontal\_9)  
4444 0.86232 (Right-Caudate)(rh.caudalmiddlefrontal\_5)(rh.superiorfrontal\_7)  
4445 0.86232 (Right-Caudate)(rh.precentral\_13)(rh.precentral\_15)  
4446 0.86232 (Right-Caudate)(Right-Putamen)(rh.lateralorbitofrontal\_2)(rh.parstriangularis\_1)  
4447 0.86232 (Right-Caudate)(Right-Putamen)(rh.lateralorbitofrontal\_6)(rh.medialorbitofrontal\_2)  
4448 0.86232 (Right-Caudate)(Right-Putamen)(rh.lateralorbitofrontal\_6)(rh.parstriangularis\_1)  
4449 0.86232 (Right-Caudate)(Right-Putamen)(rh.medialorbitofrontal\_2)(rh.rostralmiddlefrontal\_12)  
4450 0.86232 (Right-Caudate)(Right-Putamen)(Right-Thalamus-Proper)(rh.posteriorcingulate\_4)

4451 0.86232 (Right-Hippocampus)(rh.entorhinal\_1)(rh.parahippocampal\_3)  
4452 0.86232 (Right-Hippocampus)(rh.precuneus\_3)(rh.precuneus\_4)  
4453 0.86232 (Right-Hippocampus)(rh.superiorparietal\_1)  
4454 0.86232 (Right-Hippocampus)(Right-Pallidum)(rh.insula\_2)  
4455 0.86232 (Right-Hippocampus)(Right-Pallidum)(Right-Putamen)(rh.insula\_2)  
4456 0.86232 (Right-Hippocampus)(Right-Pallidum)(Right-Putamen)(Right-Thalamus-Proper)(rh.insula\_2)  
4457 0.86232 (Right-Hippocampus)(Right-Pallidum)(Right-Thalamus-Proper)(rh.insula\_2)  
4458 0.86232 (Right-Putamen)(rh.insula\_7)(rh.lateralorbitofrontal\_2)(rh.parstriangularis\_1)  
4459 0.86232 (Right-Putamen)(rh.lateralorbitofrontal\_2)(rh.lateralorbitofrontal\_6)(rh.lateralorbitofrontal\_7)(rh.parstriangularis\_1)(rh.rostralmiddlefrontal\_12)  
4460 0.86232 (Right-Putamen)(rh.lateralorbitofrontal\_6)(rh.lateralorbitofrontal\_7)(rh.medialorbitofrontal\_2)(rh.rostralmiddlefrontal\_12)  
4461 0.86232 (Right-Putamen)(rh.lateralorbitofrontal\_6)(rh.parstriangularis\_1)(rh.rostralmiddlefrontal\_8)  
4462 0.86232 (Right-Putamen)(rh.rostralmiddlefrontal\_10)(rh.superiorfrontal\_2)  
4463 0.86232 (Right-Putamen)(rh.superiorparietal\_1)(rh.supramarginal\_8)  
4464 0.86232 (Right-Putamen)(Right-Thalamus-Proper)(rh.posteriorcingulate\_4)  
4465 0.8599 (Left-Accumbens-area)(Left-Putamen)(lh.medialorbitofrontal\_4)  
4466 0.8599 (Left-Accumbens-area)(Right-Thalamus-Proper)  
4467 0.8599 (Left-Caudate)(Left-Putamen)(lh.caudalmiddlefrontal\_3)(lh.parstriangularis\_3)  
4468 0.8599 (Left-Caudate)(Left-Putamen)(lh.caudalmiddlefrontal\_3)(lh.rostralmiddlefrontal\_9)  
4469 0.8599 (Left-Caudate)(Left-Putamen)(lh.insula\_6)(lh.rostralmiddlefrontal\_1)(lh.rostralmiddlefrontal\_4)  
4470 0.8599 (Left-Caudate)(Left-Putamen)(lh.lateralorbitofrontal\_4)(lh.rostralmiddlefrontal\_12)  
4471 0.8599 (Left-Caudate)(Left-Putamen)(lh.lateralorbitofrontal\_7)(lh.medialorbitofrontal\_2)(lh.rostralmiddlefrontal\_12)(lh.rostralmiddlefrontal\_9)  
4472 0.8599 (Left-Caudate)(Left-Putamen)(lh.medialorbitofrontal\_2)(lh.superiorfrontal\_4)  
4473 0.8599 (Left-Caudate)(Left-Putamen)(lh.parstriangularis\_3)(lh.rostralmiddlefrontal\_1)(lh.rostralmiddlefrontal\_4)(lh.rostralmiddlefrontal\_9)  
4474 0.8599 (Left-Caudate)(Left-Putamen)(lh.postcentral\_3)  
4475 0.8599 (Left-Caudate)(lh.caudalanteriorcingulate\_1)(lh.superiorfrontal\_11)  
4476 0.8599 (Left-Caudate)(lh.lateralorbitofrontal\_6)(lh.rostralmiddlefrontal\_12)(lh.rostralmiddlefrontal\_9)  
4477 0.8599 (Left-Caudate)(lh.lateralorbitofrontal\_7)(lh.medialorbitofrontal\_2)(lh.rostralanteriorcingulate\_1)(lh.rostralmiddlefrontal\_9)  
4478 0.8599 (Left-Caudate)(lh.medialorbitofrontal\_2)(lh.parstriangularis\_3)  
4479 0.8599 (Left-Caudate)(lh.parsopercularis\_1)  
4480 0.8599 (Left-Caudate)(lh.rostralanteriorcingulate\_1)(lh.superiorfrontal\_3)  
4481 0.8599 (Left-Caudate)(lh.rostralanteriorcingulate\_2)(lh.superiorfrontal\_10)(lh.superiorfrontal\_4)  
4482 0.8599 (Left-Caudate)(rh.rostralanteriorcingulate\_1)  
4483 0.8599 (Left-Hippocampus)(lh.lingual\_7)(lh.lingual\_8)  
4484 0.8599 (Left-Putamen)(Left-Thalamus-Proper)(lh.postcentral\_3)  
4485 0.8599 (Left-Putamen)(Left-Thalamus-Proper)(lh.transversetemporal\_2)  
4486 0.8599 (Left-Putamen)(lh.caudalmiddlefrontal\_1)(lh.caudalmiddlefrontal\_3)(lh.caudalmiddlefrontal\_5)  
4487 0.8599 (Left-Putamen)(lh.lateralorbitofrontal\_1)(lh.lateralorbitofrontal\_4)  
4488 0.8599 (Left-Putamen)(lh.lateralorbitofrontal\_4)(lh.lateralorbitofrontal\_6)(lh.lateralorbitofrontal\_7)(lh.parstriangularis\_3)(lh.rostralmiddlefrontal\_9)  
4489 0.8599 (Left-Putamen)(lh.posteriorcingulate\_3)(lh.superiorfrontal\_14)  
4490 0.8599 (lh.caudalanteriorcingulate\_1)(lh.superiorfrontal\_8)  
4491 0.8599 (lh.caudalanteriorcingulate\_2)(lh.rostralanteriorcingulate\_2)(lh.superiorfrontal\_10)  
4492 0.8599 (lh.caudalmiddlefrontal\_3)(lh.rostralmiddlefrontal\_4)(lh.superiorfrontal\_11)  
4493 0.8599 (lh.cuneus\_1)(lh.lateraloccipital\_2)(lh.pericalcarine\_3)  
4494 0.8599 (lh.fusiform\_1)(lh.fusiform\_5)(lh.inferiortemporal\_8)  
4495 0.8599 (lh.fusiform\_1)(lh.lingual\_8)(lh.pericalcarine\_3)  
4496 0.8599 (lh.fusiform\_2)(lh.lateraloccipital\_6)(lh.lingual\_1)(lh.lingual\_4)  
4497 0.8599 (lh.fusiform\_3)(lh.fusiform\_5)(lh.lateraloccipital\_9)  
4498 0.8599 (lh.fusiform\_5)(lh.inferiorparietal\_4)(lh.lateraloccipital\_9)  
4499 0.8599 (lh.fusiform\_5)(lh.lingual\_6)(lh.lingual\_8)  
4500 0.8599 (lh.inferiorparietal\_1)(lh.inferiorparietal\_2)

4501 0.8599 (lh.inferiorparietal\_1)(lh.lateraloccipital\_2)(lh.pericalcarine\_3)  
4502 0.8599 (lh.lateraloccipital\_10)(lh.lateraloccipital\_9)  
4503 0.8599 (lh.lateraloccipital\_2)(lh.lateraloccipital\_6)(lh.pericalcarine\_2)(lh.pericalcarine\_3)  
4504 0.8599 (lh.lateraloccipital\_6)(lh.lingual\_3)  
4505 0.8599 (lh.lateralorbitofrontal\_6)(lh.lateralorbitofrontal\_7)(lh.rostralmiddlefrontal\_12)(lh.rostralmiddlefrontal\_6)  
4506 0.8599 (lh.lingual\_3)(lh.pericalcarine\_2)(lh.pericalcarine\_3)  
4507 0.8599 (lh.medialorbitofrontal\_2)(lh.rostralmiddlefrontal\_12)(lh.rostralmiddlefrontal\_9)(lh.superiorfrontal\_1)(lh.superiorfrontal\_3)  
4508 0.8599 (lh.medialorbitofrontal\_5)(lh.rostralanteriorcingulate\_1)  
4509 0.8599 (lh.paracentral\_4)(lh.superiorfrontal\_15)(lh.superiorfrontal\_18)  
4510 0.8599 (lh.parsopercularis\_2)(lh.parstriangularis\_2)  
4511 0.8599 (lh.postcentral\_3)(lh.precentral\_4)  
4512 0.8599 (lh.postcentral\_8)(lh.precentral\_11)(lh.precentral\_14)  
4513 0.8599 (lh.precuneus\_10)(lh.precuneus\_11)(lh.superiorparietal\_11)  
4514 0.8599 (lh.rostralanteriorcingulate\_1)(lh.rostralanteriorcingulate\_2)(lh.rostralmiddlefrontal\_4)(lh.superiorfrontal\_4)  
4515 0.8599 (lh.rostralanteriorcingulate\_1)(lh.rostralanteriorcingulate\_2)(lh.rostralmiddlefrontal\_9)(lh.superiorfrontal\_4)  
4516 0.8599 (lh.rostralmiddlefrontal\_1)(lh.rostralmiddlefrontal\_8)  
4517 0.8599 (lh.rostralmiddlefrontal\_2)(lh.rostralmiddlefrontal\_5)  
4518 0.8599 (lh.rostralmiddlefrontal\_5)(lh.rostralmiddlefrontal\_9)  
4519 0.8599 (lh.superiorfrontal\_10)(lh.superiorfrontal\_3)(lh.superiorfrontal\_6)  
4520 0.8599 (lh.superiorfrontal\_10)(lh.superiorfrontal\_4)(lh.superiorfrontal\_5)(lh.superiorfrontal\_6)  
4521 0.8599 (lh.superiorfrontal\_15)(lh.superiorfrontal\_16)(lh.superiorfrontal\_17)  
4522 0.8599 (lh.superiorparietal\_5)(lh.superiortemporal\_2)  
4523 0.8599 (rh.caudalmiddlefrontal\_1)(rh.caudalmiddlefrontal\_5)  
4524 0.8599 (rh.cuneus\_2)(rh.cuneus\_3)  
4525 0.8599 (rh.cuneus\_2)(rh.superiorparietal\_13)  
4526 0.8599 (rh.fusiform\_1)(rh.fusiform\_2)(rh.inferiorparietal\_10)  
4527 0.8599 (rh.fusiform\_8)(rh.inferiortemporal\_1)(rh.insula\_5)  
4528 0.8599 (rh.inferiorparietal\_10)(rh.inferiorparietal\_12)(rh.superiorparietal\_11)  
4529 0.8599 (rh.inferiorparietal\_5)(rh.inferiorparietal\_6)  
4530 0.8599 (rh.inferiortemporal\_2)(rh.middletemporal\_7)(rh.middletemporal\_8)  
4531 0.8599 (rh.insula\_7)(rh.rostralmiddlefrontal\_5)  
4532 0.8599 (rh.lateraloccipital\_1)(rh.pericalcarine\_2)(rh.superiorparietal\_13)  
4533 0.8599 (rh.lateraloccipital\_4)(rh.lateraloccipital\_8)(rh.superiorparietal\_11)  
4534 0.8599 (rh.lateraloccipital\_4)(rh.pericalcarine\_1)(rh.pericalcarine\_3)  
4535 0.8599 (rh.lateralorbitofrontal\_6)(rh.parstriangularis\_1)(rh.rostralmiddlefrontal\_12)(rh.rostralmiddlefrontal\_8)  
4536 0.8599 (rh.medialorbitofrontal\_2)(rh.superiorfrontal\_1)(rh.superiorfrontal\_2)  
4537 0.8599 (rh.paracentral\_3)(rh.precentral\_14)(rh.precentral\_15)  
4538 0.8599 (rh.postcentral\_1)(rh.precentral\_4)(rh.precentral\_6)  
4539 0.8599 (rh.postcentral\_1)(rh.precentral\_6)(rh.precentral\_7)  
4540 0.8599 (rh.rostralmiddlefrontal\_11)(rh.rostralmiddlefrontal\_12)(rh.rostralmiddlefrontal\_8)  
4541 0.8599 (rh.rostralmiddlefrontal\_8)(rh.superiorfrontal\_1)  
4542 0.8599 (rh.superiorfrontal\_11)(rh.superiorfrontal\_13)(rh.superiorfrontal\_7)  
4543 0.8599 (Right-Accumbens-area)(Right-Amygdala)(Right-Hippocampus)(Right-Pallidum)(Right-Putamen)(Right-Thalamus-Proper)  
4544 0.8599 (Right-Accumbens-area)(Right-Amygdala)(Right-Hippocampus)(Right-Pallidum)(Right-Putamen)  
4545 0.8599 (Right-Accumbens-area)(Right-Amygdala)(Right-Hippocampus)(Right-Putamen)(Right-Thalamus-Proper)  
4546 0.8599 (Right-Accumbens-area)(Right-Amygdala)(Right-Hippocampus)(Right-Putamen)  
4547 0.8599 (Right-Caudate)(rh.lateralorbitofrontal\_2)(rh.lateralorbitofrontal\_7)  
4548 0.8599 (Right-Caudate)(rh.lateralorbitofrontal\_5)(rh.lateralorbitofrontal\_7)(rh.medialorbitofrontal\_2)  
4549 0.8599 (Right-Caudate)(rh.parsopercularis\_2)  
4550 0.8599 (Right-Caudate)(Right-Putamen)(rh.caudalmiddlefrontal\_4)(rh.rostralmiddlefrontal\_3)

4551 0.8599 (Right-Caudate)(Right-Putamen)(rh.lateralorbitofrontal\_2)(rh.lateralorbitofrontal\_7)  
4552 0.8599 (Right-Hippocampus)(rh.inferiorparietal\_10)(rh.lateraloccipital\_10)  
4553 0.8599 (Right-Hippocampus)(rh.insula\_2)(rh.insula\_4)(rh.insula\_5)  
4554 0.8599 (Right-Hippocampus)(rh.precuneus\_2)(rh.precuneus\_4)  
4555 0.8599 (Right-Hippocampus)(Right-Putamen)(rh.insula\_2)(rh.insula\_4)(rh.insula\_5)  
4556 0.8599 (Right-Hippocampus)(Right-Putamen)(Right-Thalamus-Proper)(rh.insula\_1)(rh.insula\_2)  
4557 0.8599 (Right-Hippocampus)(Right-Thalamus-Proper)(rh.insula\_1)(rh.insula\_2)  
4558 0.8599 (Right-Putamen)(rh.lateralorbitofrontal\_6)(rh.rostralmiddlefrontal\_12)(rh.rostralmiddlefrontal\_8)  
4559 0.8599 (Right-Putamen)(rh.lateralorbitofrontal\_7)(rh.parstriangularis\_1)(rh.rostralmiddlefrontal\_8)  
4560 0.8599 (Right-Putamen)(rh.parstriangularis\_1)(rh.rostralmiddlefrontal\_12)(rh.rostralmiddlefrontal\_3)  
4561 0.8599 (Right-Putamen)(rh.precentral\_13)(rh.precentral\_8)  
4562 0.8599 (Right-Putamen)(rh.rostralmiddlefrontal\_5)(rh.rostralmiddlefrontal\_8)(rh.superiorfrontal\_2)  
4563 0.8599 (Right-Putamen)(rh.rostralmiddlefrontal\_9)(rh.superiorfrontal\_2)  
4564 0.85749 (Left-Accumbens-area)(Left-Putamen)(lh.lateralorbitofrontal\_2)  
4565 0.85749 (Left-Accumbens-area)(Left-Thalamus-Proper)(Right-Thalamus-Proper)  
4566 0.85749 (Left-Accumbens-area)(lh.lateralorbitofrontal\_3)  
4567 0.85749 (Left-Caudate)(Left-Pallidum)(Left-Putamen)(Left-Thalamus-Proper)(lh.insula\_1)(lh.precentral\_11)  
4568 0.85749 (Left-Caudate)(Left-Pallidum)(Left-Thalamus-Proper)(lh.insula\_1)(lh.precentral\_11)  
4569 0.85749 (Left-Caudate)(Left-Putamen)(lh.caudalanteriorcingulate\_2)(lh.caudalmiddlefrontal\_5)  
4570 0.85749 (Left-Caudate)(Left-Putamen)(lh.insula\_6)(lh.parsopercularis\_3)(lh.parstriangularis\_3)  
4571 0.85749 (Left-Caudate)(Left-Putamen)(lh.lateralorbitofrontal\_4)(lh.rostralanteriorcingulate\_1)  
4572 0.85749 (Left-Caudate)(Left-Putamen)(lh.lateralorbitofrontal\_6)(lh.parstriangularis\_3)(lh.rostralmiddlefrontal\_9)  
4573 0.85749 (Left-Caudate)(Left-Putamen)(lh.lateralorbitofrontal\_7)(lh.parstriangularis\_3)(lh.rostralmiddlefrontal\_12)  
4574 0.85749 (Left-Caudate)(Left-Putamen)(lh.paracentral\_5)  
4575 0.85749 (Left-Caudate)(Left-Putamen)(lh.rostralanteriorcingulate\_1)(lh.rostralanteriorcingulate\_2)(lh.rostralmiddlefrontal\_4)  
4576 0.85749 (Left-Caudate)(Left-Putamen)(lh.rostralanteriorcingulate\_1)(lh.rostralmiddlefrontal\_1)  
4577 0.85749 (Left-Caudate)(Left-Putamen)(lh.rostralanteriorcingulate\_2)(lh.superiorfrontal\_11)  
4578 0.85749 (Left-Caudate)(Left-Thalamus-Proper)(lh.supramarginal\_1)  
4579 0.85749 (Left-Caudate)(lh.caudalanteriorcingulate\_1)(lh.caudalanteriorcingulate\_2)(lh.posteriorcingulate\_1)  
4580 0.85749 (Left-Caudate)(lh.caudalanteriorcingulate\_1)(lh.posteriorcingulate\_1)  
4581 0.85749 (Left-Caudate)(lh.caudalanteriorcingulate\_2)(lh.superiorfrontal\_10)(lh.superiorfrontal\_8)  
4582 0.85749 (Left-Caudate)(lh.caudalanteriorcingulate\_2)(lh.superiorfrontal\_11)(lh.superiorfrontal\_12)(lh.superiorfrontal\_14)(lh.superiorfrontal\_8)  
4583 0.85749 (Left-Caudate)(lh.caudalmiddlefrontal\_1)(lh.caudalmiddlefrontal\_3)(lh.rostralmiddlefrontal\_4)  
4584 0.85749 (Left-Caudate)(lh.caudalmiddlefrontal\_1)(lh.rostralmiddlefrontal\_1)  
4585 0.85749 (Left-Caudate)(lh.caudalmiddlefrontal\_5)(lh.precentral\_9)  
4586 0.85749 (Left-Caudate)(lh.isthmuscingulate\_2)  
4587 0.85749 (Left-Caudate)(lh.lateralorbitofrontal\_4)(lh.rostralanteriorcingulate\_1)  
4588 0.85749 (Left-Caudate)(lh.lateralorbitofrontal\_6)(lh.rostralmiddlefrontal\_1)(lh.rostralmiddlefrontal\_9)  
4589 0.85749 (Left-Caudate)(lh.precentral\_4)(lh.superiorfrontal\_12)  
4590 0.85749 (Left-Caudate)(lh.precentral\_7)(lh.precentral\_9)  
4591 0.85749 (Left-Caudate)(lh.rostralanteriorcingulate\_2)(lh.rostralmiddlefrontal\_1)  
4592 0.85749 (Left-Caudate)(lh.rostralmiddlefrontal\_4)(lh.rostralmiddlefrontal\_8)  
4593 0.85749 (Left-Caudate)(lh.rostralmiddlefrontal\_9)(lh.superiorfrontal\_3)  
4594 0.85749 (Left-Caudate)(lh.superiorfrontal\_10)(lh.superiorfrontal\_14)  
4595 0.85749 (Left-Caudate)(Right-Caudate)(rh.rostralanteriorcingulate\_1)  
4596 0.85749 (Left-Hippocampus)(lh.bankssts\_2)(lh.superiortemporal\_6)  
4597 0.85749 (Left-Hippocampus)(lh.fusiform\_4)  
4598 0.85749 (Left-Hippocampus)(lh.insula\_4)(lh.superiortemporal\_11)  
4599 0.85749 (Left-Hippocampus)(lh.superiortemporal\_9)  
4600 0.85749 (Left-Putamen)(lh.caudalanteriorcingulate\_2)(lh.caudalmiddlefrontal\_1)(lh.caudalmiddlefrontal\_3)

4601 0.85749 (Left-Putamen)(lh.caudalanteriorcingulate\_2)(lh.superiorfrontal\_11)(lh.superiorfrontal\_14)  
4602 0.85749 (Left-Putamen)(lh.caudalmiddlefrontal\_3)(lh.insula\_6)(lh.parsopercularis\_3)  
4603 0.85749 (Left-Putamen)(lh.lateralorbitofrontal\_7)(lh.medialorbitofrontal\_2)(lh.medialorbitofrontal\_4)  
4604 0.85749 (Left-Putamen)(lh.parsopercularis\_1)(lh.precentral\_14)  
4605 0.85749 (Left-Putamen)(lh.rostralanteriorcingulate\_1)(lh.superiorfrontal\_3)(lh.superiorfrontal\_4)  
4606 0.85749 (Left-Putamen)(lh.rostralanteriorcingulate\_2)(lh.rostralmiddlefrontal\_4)(lh.rostralmiddlefrontal\_9)  
4607 0.85749 (Left-Putamen)(lh.rostralmiddlefrontal\_3)  
4608 0.85749 (lh.caudalanteriorcingulate\_1)(lh.caudalanteriorcingulate\_2)(lh.posteriorcingulate\_1)  
4609 0.85749 (lh.caudalanteriorcingulate\_1)(lh.caudalanteriorcingulate\_2)(lh.superiorfrontal\_11)  
4610 0.85749 (lh.caudalanteriorcingulate\_1)(lh.posteriorcingulate\_1)  
4611 0.85749 (lh.caudalanteriorcingulate\_2)(lh.posteriorcingulate\_3)(lh.superiorfrontal\_8)  
4612 0.85749 (lh.caudalanteriorcingulate\_2)(lh.rostralanteriorcingulate\_1)(lh.superiorfrontal\_4)  
4613 0.85749 (lh.caudalmiddlefrontal\_1)(lh.rostralmiddlefrontal\_1)(lh.rostralmiddlefrontal\_4)  
4614 0.85749 (lh.cuneus\_1)(lh.cuneus\_2)(lh.superiorparietal\_12)  
4615 0.85749 (lh.fusiform\_2)(lh.lateraloccipital\_7)(lh.lingual\_1)  
4616 0.85749 (lh.fusiform\_2)(lh.pericalcarine\_2)  
4617 0.85749 (lh.fusiform\_4)(lh.fusiform\_6)(lh.fusiform\_7)  
4618 0.85749 (lh.fusiform\_4)(lh.inferiortemporal\_6)  
4619 0.85749 (lh.fusiform\_5)(lh.inferiortemporal\_7)  
4620 0.85749 (lh.insula\_1)(lh.supramarginal\_4)(lh.supramarginal\_9)  
4621 0.85749 (lh.insula\_6)(lh.parsopercularis\_1)(lh.parsopercularis\_3)(lh.parsopercularis\_4)  
4622 0.85749 (lh.lateraloccipital\_2)(lh.lateraloccipital\_3)(lh.pericalcarine\_1)(lh.pericalcarine\_2)  
4623 0.85749 (lh.lateraloccipital\_2)(lh.lateraloccipital\_7)  
4624 0.85749 (lh.lateraloccipital\_6)(lh.lateraloccipital\_7)(lh.lingual\_1)  
4625 0.85749 (lh.lateralorbitofrontal\_4)(lh.parstriangularis\_1)  
4626 0.85749 (lh.lateralorbitofrontal\_5)(lh.lateralorbitofrontal\_6)  
4627 0.85749 (lh.lateralorbitofrontal\_6)(lh.lateralorbitofrontal\_7)(lh.rostralmiddlefrontal\_6)(lh.rostralmiddlefrontal\_9)  
4628 0.85749 (lh.lateralorbitofrontal\_6)(lh.medialorbitofrontal\_2)  
4629 0.85749 (lh.lateralorbitofrontal\_6)(lh.rostralmiddlefrontal\_1)(lh.rostralmiddlefrontal\_12)  
4630 0.85749 (lh.lateralorbitofrontal\_7)(lh.parstriangularis\_3)(lh.rostralanteriorcingulate\_1)(lh.rostralmiddlefrontal\_12)(lh.rostralmiddlefrontal\_9)  
4631 0.85749 (lh.lateralorbitofrontal\_7)(lh.rostralmiddlefrontal\_12)(lh.superiorfrontal\_3)  
4632 0.85749 (lh.parsopercularis\_1)(lh.parsopercularis\_4)(lh.precentral\_16)  
4633 0.85749 (lh.postcentral\_8)(lh.postcentral\_9)  
4634 0.85749 (lh.posteriorcingulate\_3)(lh.posteriorcingulate\_4)  
4635 0.85749 (lh.precuneus\_10)(lh.precuneus\_8)(lh.superiorparietal\_11)  
4636 0.85749 (lh.precuneus\_3)(lh.superiorparietal\_5)(lh.superiorparietal\_7)  
4637 0.85749 (lh.precuneus\_4)(lh.superiorparietal\_8)  
4638 0.85749 (lh.precuneus\_6)(lh.superiorparietal\_5)(lh.superiorparietal\_7)  
4639 0.85749 (lh.rostralanteriorcingulate\_2)(lh.superiorfrontal\_10)(lh.superiorfrontal\_11)  
4640 0.85749 (lh.rostralmiddlefrontal\_1)(lh.rostralmiddlefrontal\_5)(lh.rostralmiddlefrontal\_7)  
4641 0.85749 (lh.superiorfrontal\_10)(lh.superiorfrontal\_3)(lh.superiorfrontal\_4)(lh.superiorfrontal\_6)  
4642 0.85749 (lh.superiorfrontal\_11)(lh.superiorfrontal\_13)(lh.superiorfrontal\_8)(lh.superiorfrontal\_9)  
4643 0.85749 (lh.superiorfrontal\_14)(lh.superiorfrontal\_15)(lh.superiorfrontal\_8)  
4644 0.85749 (lh.superiorfrontal\_15)(lh.superiorfrontal\_8)  
4645 0.85749 (lh.superiorfrontal\_3)(lh.superiorfrontal\_4)(lh.superiorfrontal\_7)  
4646 0.85749 (lh.superiorfrontal\_3)(lh.superiorfrontal\_7)  
4647 0.85749 (rh.bankssts\_1)(rh.inferiortemporal\_7)(rh.middletemporal\_1)  
4648 0.85749 (rh.bankssts\_2)(rh.inferiortemporal\_7)  
4649 0.85749 (rh.bankssts\_2)(rh.insula\_2)(rh.superiortemporal\_1)  
4650 0.85749 (rh.caudalmiddlefrontal\_5)(rh.superiorfrontal\_13)

4651 0.85749 (rh.fusiform\_1)(rh.fusiform\_2)(rh.lateraloccipital\_10)(rh.lingual\_7)  
4652 0.85749 (rh.fusiform\_1)(rh.lateraloccipital\_10)(rh.lateraloccipital\_8)(rh.lingual\_7)  
4653 0.85749 (rh.fusiform\_7)(rh.inferiortemporal\_6)  
4654 0.85749 (rh.inferiorparietal\_1)(rh.supramarginal\_8)  
4655 0.85749 (rh.inferiorparietal\_10)(rh.inferiorparietal\_11)(rh.inferiorparietal\_12)(rh.lateraloccipital\_8)  
4656 0.85749 (rh.inferiorparietal\_10)(rh.lateraloccipital\_4)(rh.lateraloccipital\_8)  
4657 0.85749 (rh.lateraloccipital\_3)(rh.lateraloccipital\_5)  
4658 0.85749 (rh.lateraloccipital\_8)(rh.pericalcarine\_3)  
4659 0.85749 (rh.lateralorbitofrontal\_7)(rh.medialorbitofrontal\_1)  
4660 0.85749 (rh.lingual\_7)(rh.precuneus\_2)(rh.superiorparietal\_11)  
4661 0.85749 (rh.middletemporal\_2)(rh.middletemporal\_6)  
4662 0.85749 (rh.paracentral\_3)(rh.paracentral\_4)(rh.precentral\_14)  
4663 0.85749 (rh.paracentral\_5)(rh.paracentral\_6)(rh.precentral\_15)  
4664 0.85749 (rh.paracentral\_6)(rh.superiorparietal\_1)(rh.superiorparietal\_2)  
4665 0.85749 (rh.parstriangularis\_2)(rh.rostralmiddlefrontal\_8)  
4666 0.85749 (rh.postcentral\_2)(rh.supramarginal\_7)  
4667 0.85749 (rh.posteriorcingulate\_4)(rh.precuneus\_10)  
4668 0.85749 (rh.precentral\_14)(rh.superiorfrontal\_17)  
4669 0.85749 (rh.precuneus\_4)(rh.superiorparietal\_1)(rh.superiorparietal\_10)(rh.superiorparietal\_7)  
4670 0.85749 (rh.superiorfrontal\_2)(rh.superiorfrontal\_3)(rh.superiorfrontal\_5)  
4671 0.85749 (Right-Caudate)(rh.lateralorbitofrontal\_2)(rh.lateralorbitofrontal\_4)  
4672 0.85749 (Right-Caudate)(rh.lateralorbitofrontal\_7)(rh.rostralmiddlefrontal\_12)  
4673 0.85749 (Right-Caudate)(rh.superiorfrontal\_13)(rh.superiorfrontal\_9)  
4674 0.85749 (Right-Caudate)(Right-Pallidum)(rh.precentral\_5)  
4675 0.85749 (Right-Caudate)(Right-Pallidum)(Right-Putamen)(rh.precentral\_5)  
4676 0.85749 (Right-Caudate)(Right-Putamen)(rh.lateralorbitofrontal\_2)(rh.lateralorbitofrontal\_4)  
4677 0.85749 (Right-Caudate)(Right-Putamen)(rh.lateralorbitofrontal\_7)(rh.rostralmiddlefrontal\_12)  
4678 0.85749 (Right-Caudate)(Right-Putamen)(rh.rostralmiddlefrontal\_1)  
4679 0.85749 (Right-Caudate)(Right-Putamen)(Right-Thalamus-Proper)(rh.posteriorcingulate\_2)(rh.precentral\_13)  
4680 0.85749 (Right-Hippocampus)(rh.bankssts\_2)(rh.bankssts\_3)  
4681 0.85749 (Right-Putamen)(rh.caudalmiddlefrontal\_1)(rh.precentral\_10)  
4682 0.85749 (Right-Putamen)(rh.insula\_1)(rh.precentral\_11)(rh.supramarginal\_1)  
4683 0.85749 (Right-Putamen)(rh.insula\_1)(rh.precentral\_7)(rh.supramarginal\_1)  
4684 0.85749 (Right-Putamen)(Right-Thalamus-Proper)(rh.insula\_2)(rh.precentral\_13)  
4685 0.85749 (Right-Putamen)(Right-Thalamus-Proper)(rh.posteriorcingulate\_2)(rh.precentral\_13)  
4686 0.85749 (Right-Thalamus-Proper)(rh.insula\_2)(rh.precentral\_13)  
4687 0.85507 (Left-Amygdala)(lh.inferiortemporal\_1)(lh.insula\_4)  
4688 0.85507 (Left-Caudate)(Left-Putamen)(lh.caudalanteriorcingulate\_2)(lh.superiorfrontal\_12)(lh.superiorfrontal\_14)  
4689 0.85507 (Left-Caudate)(Left-Putamen)(lh.parstriangularis\_3)(lh.rostralanteriorcingulate\_1)(lh.rostralmiddlefrontal\_12)  
4690 0.85507 (Left-Caudate)(Left-Putamen)(lh.posteriorcingulate\_3)(lh.superiorfrontal\_14)  
4691 0.85507 (Left-Caudate)(Left-Thalamus-Proper)(lh.insula\_1)(lh.postcentral\_8)  
4692 0.85507 (Left-Caudate)(lh.caudalanteriorcingulate\_1)(lh.caudalanteriorcingulate\_2)(lh.superiorfrontal\_11)  
4693 0.85507 (Left-Caudate)(lh.caudalmiddlefrontal\_3)(lh.parsopercularis\_3)  
4694 0.85507 (Left-Caudate)(lh.insula\_6)(lh.parstriangularis\_3)(lh.rostralmiddlefrontal\_9)  
4695 0.85507 (Left-Caudate)(lh.medialorbitofrontal\_2)(lh.rostralmiddlefrontal\_9)(lh.superiorfrontal\_4)  
4696 0.85507 (Left-Caudate)(lh.parstriangularis\_3)(lh.rostralanteriorcingulate\_1)(lh.rostralanteriorcingulate\_2)  
4697 0.85507 (Left-Caudate)(lh.rostralanteriorcingulate\_2)(lh.rostralmiddlefrontal\_8)  
4698 0.85507 (Left-Caudate)(lh.rostralanteriorcingulate\_2)(lh.superiorfrontal\_4)(lh.superiorfrontal\_8)  
4699 0.85507 (Left-Caudate)(lh.rostralmiddlefrontal\_1)(lh.superiorfrontal\_4)  
4700 0.85507 (Left-Caudate)(lh.rostralmiddlefrontal\_3)(lh.rostralmiddlefrontal\_4)

4701 0.85507 (Left-Caudate)(lh.superiorfrontal\_14)(lh.superiorfrontal\_4)(lh.superiorfrontal\_8)  
4702 0.85507 (Left-Hippocampus)(lh.bankssts\_2)(lh.fusiform\_5)  
4703 0.85507 (Left-Hippocampus)(lh.fusiform\_7)(lh.fusiform\_8)  
4704 0.85507 (Left-Hippocampus)(lh.middletemporal\_4)  
4705 0.85507 (Left-Putamen)(lh.insula\_1)(lh.postcentral\_8)(lh.precentral\_7)  
4706 0.85507 (Left-Putamen)(lh.lateralorbitofrontal\_7)(lh.medialorbitofrontal\_2)(lh.parstriangularis\_3)  
4707 0.85507 (Left-Putamen)(lh.lateralorbitofrontal\_7)(lh.medialorbitofrontal\_2)(lh.rostralanteriorcingulate\_1)(lh.rostralmiddlefrontal\_12)(lh.rostralmiddlefrontal\_9)  
4708 0.85507 (Left-Putamen)(lh.lateralorbitofrontal\_7)(lh.parstriangularis\_3)(lh.rostralanteriorcingulate\_1)(lh.rostralmiddlefrontal\_9)  
4709 0.85507 (Left-Putamen)(lh.rostralanteriorcingulate\_2)(lh.rostralmiddlefrontal\_8)  
4710 0.85507 (Left-Putamen)(lh.rostralmiddlefrontal\_12)(lh.rostralmiddlefrontal\_4)  
4711 0.85507 (lh.bankssts\_2)(lh.fusiform\_7)(lh.inferiortemporal\_6)  
4712 0.85507 (lh.caudalmiddlefrontal\_1)(lh.caudalmiddlefrontal\_3)(lh.superiorfrontal\_11)  
4713 0.85507 (lh.inferiorparietal\_4)(lh.lateraloccipital\_9)(lh.lingual\_8)  
4714 0.85507 (lh.inferiorparietal\_5)(lh.insula\_2)  
4715 0.85507 (lh.inferiortemporal\_6)(lh.inferiortemporal\_7)(lh.middletemporal\_3)  
4716 0.85507 (lh.insula\_1)(lh.superiorparietal\_3)(lh.supramarginal\_9)  
4717 0.85507 (lh.insula\_3)(lh.postcentral\_14)  
4718 0.85507 (lh.insula\_6)(lh.parsopercularis\_1)(lh.precentral\_14)  
4719 0.85507 (lh.insula\_6)(lh.rostralanteriorcingulate\_1)  
4720 0.85507 (lh.lateraloccipital\_11)(lh.lateraloccipital\_6)(lh.lingual\_1)(lh.pericalcarine\_3)  
4721 0.85507 (lh.lateraloccipital\_6)(lh.lateraloccipital\_7)(lh.lateraloccipital\_9)  
4722 0.85507 (lh.lateraloccipital\_9)(lh.lingual\_6)(lh.lingual\_8)  
4723 0.85507 (lh.lateraloccipital\_9)(lh.pericalcarine\_3)  
4724 0.85507 (lh.lateralorbitofrontal\_4)(lh.lateralorbitofrontal\_6)(lh.lateralorbitofrontal\_7)(lh.parstriangularis\_3)(lh.rostralmiddlefrontal\_12)(lh.rostralmiddlefrontal\_9)  
4725 0.85507 (lh.lateralorbitofrontal\_4)(lh.rostralanteriorcingulate\_1)(lh.rostralmiddlefrontal\_12)  
4726 0.85507 (lh.lateralorbitofrontal\_6)(lh.parstriangularis\_3)(lh.rostralmiddlefrontal\_1)(lh.rostralmiddlefrontal\_12)  
4727 0.85507 (lh.lateralorbitofrontal\_7)(lh.medialorbitofrontal\_2)(lh.parstriangularis\_3)(lh.rostralmiddlefrontal\_9)  
4728 0.85507 (lh.lateralorbitofrontal\_7)(lh.medialorbitofrontal\_2)(lh.rostralmiddlefrontal\_12)(lh.superiorfrontal\_3)  
4729 0.85507 (lh.lingual\_2)(lh.pericalcarine\_2)  
4730 0.85507 (lh.paracentral\_5)(lh.superiorfrontal\_12)(lh.superiorfrontal\_15)  
4731 0.85507 (lh.parsopercularis\_2)(lh.parstriangularis\_2)(lh.parstriangularis\_3)  
4732 0.85507 (lh.precentral\_11)(lh.supramarginal\_9)  
4733 0.85507 (lh.precuneus\_8)(lh.superiorparietal\_9)  
4734 0.85507 (lh.rostralanteriorcingulate\_1)(lh.rostralmiddlefrontal\_4)(lh.rostralmiddlefrontal\_9)(lh.superiorfrontal\_4)  
4735 0.85507 (lh.rostralanteriorcingulate\_2)(lh.superiorfrontal\_10)(lh.superiorfrontal\_4)(lh.superiorfrontal\_8)  
4736 0.85507 (lh.rostralmiddlefrontal\_1)(lh.rostralmiddlefrontal\_2)(lh.rostralmiddlefrontal\_3)  
4737 0.85507 (lh.rostralmiddlefrontal\_1)(lh.rostralmiddlefrontal\_4)(lh.rostralmiddlefrontal\_7)  
4738 0.85507 (lh.rostralmiddlefrontal\_1)(lh.rostralmiddlefrontal\_4)(lh.superiorfrontal\_4)  
4739 0.85507 (lh.rostralmiddlefrontal\_4)(lh.rostralmiddlefrontal\_8)(lh.superiorfrontal\_3)  
4740 0.85507 (lh.rostralmiddlefrontal\_8)(lh.superiorfrontal\_3)(lh.superiorfrontal\_4)(lh.superiorfrontal\_5)  
4741 0.85507 (lh.rostralmiddlefrontal\_8)(lh.superiorfrontal\_3)(lh.superiorfrontal\_5)  
4742 0.85507 (lh.rostralmiddlefrontal\_9)(lh.superiorfrontal\_2)(lh.superiorfrontal\_4)  
4743 0.85507 (lh.superiorfrontal\_1)(lh.superiorfrontal\_2)(lh.superiorfrontal\_3)(lh.superiorfrontal\_4)  
4744 0.85507 (lh.superiorfrontal\_1)(lh.superiorfrontal\_2)(lh.superiorfrontal\_4)  
4745 0.85507 (lh.superiorfrontal\_10)(lh.superiorfrontal\_3)(lh.superiorfrontal\_4)(lh.superiorfrontal\_5)  
4746 0.85507 (lh.superiorfrontal\_10)(lh.superiorfrontal\_3)(lh.superiorfrontal\_5)  
4747 0.85507 (rh.bankssts\_1)(rh.inferiortemporal\_5)(rh.middletemporal\_2)  
4748 0.85507 (rh.caudalanteriorcingulate\_2)(rh.superiorfrontal\_11)  
4749 0.85507 (rh.caudalmiddlefrontal\_4)(rh.superiorfrontal\_14)  
4750 0.85507 (rh.fusiform\_1)(rh.lateraloccipital\_10)(rh.lingual\_5)(rh.lingual\_7)

4751 0.85507 (rh.inferiorparietal\_11)(rh.lateraloccipital\_4)(rh.lateraloccipital\_8)  
4752 0.85507 (rh.lateraloccipital\_4)(rh.lateraloccipital\_7)(rh.pericalcarine\_4)  
4753 0.85507 (rh.lateralorbitofrontal\_6)(rh.parstriangularis\_2)  
4754 0.85507 (rh.lateralorbitofrontal\_6)(rh.rostralmiddlefrontal\_12)(rh.rostralmiddlefrontal\_7)  
4755 0.85507 (rh.lateralorbitofrontal\_7)(rh.rostralmiddlefrontal\_12)(rh.rostralmiddlefrontal\_8)(rh.superiorfrontal\_2)  
4756 0.85507 (rh.paracentral\_4)(rh.precentral\_13)(rh.superiorfrontal\_17)  
4757 0.85507 (rh.parstriangularis\_1)(rh.rostralanteriorcingulate\_2)  
4758 0.85507 (rh.postcentral\_4)(rh.precentral\_1)  
4759 0.85507 (rh.precentral\_13)(rh.precentral\_6)  
4760 0.85507 (rh.precuneus\_4)(rh.superiorparietal\_7)(rh.superiorparietal\_8)  
4761 0.85507 (rh.precuneus\_7)(rh.superiorparietal\_10)(rh.superiorparietal\_7)(rh.superiorparietal\_8)  
4762 0.85507 (rh.rostralmiddlefrontal\_1)(rh.superiorfrontal\_5)  
4763 0.85507 (rh.rostralmiddlefrontal\_2)(rh.rostralmiddlefrontal\_3)(rh.rostralmiddlefrontal\_5)  
4764 0.85507 (rh.superiorfrontal\_13)(rh.superiorfrontal\_7)(rh.superiorfrontal\_8)(rh.superiorfrontal\_9)  
4765 0.85507 (rh.superiorfrontal\_2)(rh.superiorfrontal\_4)(rh.superiorfrontal\_6)(rh.superiorfrontal\_7)  
4766 0.85507 (rh.supramarginal\_6)(rh.supramarginal\_7)(rh.supramarginal\_8)(rh.supramarginal\_9)  
4767 0.85507 (Right-Amygdala)(Right-Hippocampus)(rh.insula\_4)(rh.insula\_5)  
4768 0.85507 (Right-Amygdala)(Right-Hippocampus)(Right-Putamen)(rh.insula\_4)(rh.insula\_5)  
4769 0.85507 (Right-Caudate)(rh.caudalmiddlefrontal\_4)(rh.parsopercularis\_4)(rh.rostralmiddlefrontal\_3)  
4770 0.85507 (Right-Caudate)(rh.lateralorbitofrontal\_7)(rh.superiorfrontal\_2)  
4771 0.85507 (Right-Caudate)(rh.parsopercularis\_2)(rh.parsopercularis\_4)  
4772 0.85507 (Right-Caudate)(rh.precentral\_8)  
4773 0.85507 (Right-Caudate)(rh.rostralmiddlefrontal\_9)  
4774 0.85507 (Right-Caudate)(Right-Pallidum)(rh.precentral\_7)  
4775 0.85507 (Right-Caudate)(Right-Pallidum)(Right-Putamen)(rh.precentral\_7)  
4776 0.85507 (Right-Caudate)(Right-Putamen)(rh.caudalmiddlefrontal\_4)(rh.rostralmiddlefrontal\_5)  
4777 0.85507 (Right-Caudate)(Right-Putamen)(rh.rostralmiddlefrontal\_5)(rh.rostralmiddlefrontal\_8)  
4778 0.85507 (Right-Hippocampus)(rh.inferiortemporal\_2)(rh.middletemporal\_4)  
4779 0.85507 (Right-Hippocampus)(rh.isthmuscingulate\_2)(rh.precuneus\_4)(rh.precuneus\_7)  
4780 0.85507 (Right-Hippocampus)(rh.superiortemporal\_1)(rh.superiortemporal\_9)  
4781 0.85507 (Right-Pallidum)(rh.parsopercularis\_4)  
4782 0.85507 (Right-Pallidum)(Right-Putamen)(rh.parsopercularis\_4)  
4783 0.85507 (Right-Putamen)(rh.caudalmiddlefrontal\_5)(rh.rostralmiddlefrontal\_1)  
4784 0.85507 (Right-Putamen)(rh.postcentral\_1)(rh.precentral\_1)(rh.precentral\_6)  
4785 0.85507 (Right-Putamen)(rh.postcentral\_5)(rh.precentral\_13)  
4786 0.85507 (Right-Putamen)(rh.superiorfrontal\_5)  
4787 0.85266 (Left-Caudate)(Left-Hippocampus)(Left-Pallidum)(Left-Putamen)(Left-Thalamus-Proper)(lh.insula\_1)  
4788 0.85266 (Left-Caudate)(Left-Hippocampus)(Left-Pallidum)(Left-Putamen)(lh.insula\_1)  
4789 0.85266 (Left-Caudate)(Left-Hippocampus)(Left-Pallidum)(Left-Thalamus-Proper)(lh.insula\_1)  
4790 0.85266 (Left-Caudate)(Left-Hippocampus)(Left-Pallidum)(lh.insula\_1)  
4791 0.85266 (Left-Caudate)(Left-Pallidum)(Left-Putamen)(lh.posteriorcingulate\_3)  
4792 0.85266 (Left-Caudate)(Left-Putamen)(Left-Thalamus-Proper)(lh.insula\_1)(lh.postcentral\_8)  
4793 0.85266 (Left-Caudate)(Left-Putamen)(lh.caudalanteriorcingulate\_2)(lh.caudalmiddlefrontal\_1)(lh.caudalmiddlefrontal\_3)  
4794 0.85266 (Left-Caudate)(Left-Putamen)(lh.caudalmiddlefrontal\_3)(lh.parsopercularis\_3)  
4795 0.85266 (Left-Caudate)(Left-Putamen)(lh.lateralorbitofrontal\_6)(lh.rostralmiddlefrontal\_12)(lh.rostralmiddlefrontal\_9)  
4796 0.85266 (Left-Caudate)(Left-Putamen)(lh.lateralorbitofrontal\_7)(lh.medialorbitofrontal\_5)  
4797 0.85266 (Left-Caudate)(Left-Putamen)(lh.lateralorbitofrontal\_7)(lh.parstriangularis\_3)(lh.rostralanteriorcingulate\_1)  
4798 0.85266 (Left-Caudate)(Left-Putamen)(lh.rostralanteriorcingulate\_2)(lh.rostralmiddlefrontal\_4)(lh.superiorfrontal\_4)  
4799 0.85266 (Left-Caudate)(Left-Putamen)(lh.rostralmiddlefrontal\_4)(lh.rostralmiddlefrontal\_9)(lh.superiorfrontal\_4)  
4800 0.85266 (Left-Caudate)(lh.lateralorbitofrontal\_6)(lh.parstriangularis\_3)(lh.rostralmiddlefrontal\_1)



4801 0.85266 (Left-Caudate)(lh.posteriorcingulate\_1)(lh.superiorfrontal\_14)  
4802 0.85266 (Left-Caudate)(lh.rostralmiddlefrontal\_1)(lh.rostralmiddlefrontal\_12)  
4803 0.85266 (Left-Caudate)(rh.rostralanteriorcingulate\_2)  
4804 0.85266 (Left-Caudate)(Right-Caudate)(rh.rostralanteriorcingulate\_2)  
4805 0.85266 (Left-Hippocampus)(lh.fusiform\_5)(lh.lingual\_6)  
4806 0.85266 (Left-Hippocampus)(lh.fusiform\_7)(lh.superiortemporal\_6)  
4807 0.85266 (Left-Hippocampus)(lh.inferiortemporal\_1)(lh.insula\_4)  
4808 0.85266 (Left-Pallidum)(Left-Putamen)(lh.insula\_7)  
4809 0.85266 (Left-Pallidum)(Left-Putamen)(lh.posteriorcingulate\_3)  
4810 0.85266 (Left-Pallidum)(Left-Putamen)(lh.precentral\_11)(lh.precentral\_9)  
4811 0.85266 (Left-Pallidum)(lh.insula\_7)  
4812 0.85266 (Left-Pallidum)(lh.precentral\_11)(lh.precentral\_9)  
4813 0.85266 (Left-Pallidum)(lh.precentral\_7)  
4814 0.85266 (Left-Putamen)(lh.caudalanteriorcingulate\_2)(lh.rostralanteriorcingulate\_2)(lh.superiorfrontal\_4)  
4815 0.85266 (Left-Putamen)(lh.insula\_6)(lh.rostralanteriorcingulate\_1)  
4816 0.85266 (Left-Putamen)(lh.medialorbitofrontal\_2)(lh.parstriangularis\_3)(lh.rostralmiddlefrontal\_12)  
4817 0.85266 (Left-Putamen)(lh.medialorbitofrontal\_2)(lh.rostralanteriorcingulate\_1)(lh.superiorfrontal\_4)  
4818 0.85266 (Left-Putamen)(lh.rostralmiddlefrontal\_12)(lh.rostralmiddlefrontal\_4)(lh.rostralmiddlefrontal\_9)  
4819 0.85266 (Left-Putamen)(lh.rostralmiddlefrontal\_4)(lh.superiorfrontal\_11)(lh.superiorfrontal\_4)  
4820 0.85266 (Left-Thalamus-Proper)(lh.postcentral\_8)(lh.precentral\_4)  
4821 0.85266 (lh.caudalanteriorcingulate\_2)(lh.caudalmiddlefrontal\_3)(lh.caudalmiddlefrontal\_5)  
4822 0.85266 (lh.caudalanteriorcingulate\_2)(lh.posteriorcingulate\_1)(lh.superiorfrontal\_12)  
4823 0.85266 (lh.caudalanteriorcingulate\_2)(lh.posteriorcingulate\_1)(lh.superiorfrontal\_14)  
4824 0.85266 (lh.caudalmiddlefrontal\_3)(lh.insula\_6)(lh.parstriangularis\_3)(lh.rostralmiddlefrontal\_1)  
4825 0.85266 (lh.caudalmiddlefrontal\_3)(lh.rostralmiddlefrontal\_2)  
4826 0.85266 (lh.cuneus\_1)(lh.inferiorparietal\_1)  
4827 0.85266 (lh.cuneus\_1)(lh.superiorparietal\_12)(lh.superiorparietal\_13)  
4828 0.85266 (lh.fusiform\_2)(lh.fusiform\_5)(lh.lingual\_8)  
4829 0.85266 (lh.fusiform\_3)(lh.fusiform\_4)(lh.fusiform\_5)  
4830 0.85266 (lh.fusiform\_5)(lh.inferiorparietal\_5)  
4831 0.85266 (lh.inferiorparietal\_6)(lh.inferiorparietal\_7)(lh.inferiorparietal\_8)(lh.inferiorparietal\_9)  
4832 0.85266 (lh.insula\_1)(lh.superiorparietal\_3)(lh.supramarginal\_1)  
4833 0.85266 (lh.isthmuscingulate\_3)(lh.parahippocampal\_3)  
4834 0.85266 (lh.lateraloccipital\_11)(lh.lateraloccipital\_5)  
4835 0.85266 (lh.lateraloccipital\_3)(lh.superiorparietal\_12)  
4836 0.85266 (lh.lateraloccipital\_7)(lh.lingual\_8)(lh.pericalcarine\_3)  
4837 0.85266 (lh.lateralorbitofrontal\_4)(lh.parstriangularis\_3)(lh.rostralanteriorcingulate\_1)(lh.rostralmiddlefrontal\_9)  
4838 0.85266 (lh.lateralorbitofrontal\_4)(lh.rostralmiddlefrontal\_6)  
4839 0.85266 (lh.lateralorbitofrontal\_6)(lh.lateralorbitofrontal\_7)(lh.rostralmiddlefrontal\_11)  
4840 0.85266 (lh.lateralorbitofrontal\_7)(lh.medialorbitofrontal\_1)(lh.medialorbitofrontal\_2)(lh.rostralmiddlefrontal\_12)  
4841 0.85266 (lh.lateralorbitofrontal\_7)(lh.medialorbitofrontal\_4)(lh.medialorbitofrontal\_5)  
4842 0.85266 (lh.lingual\_6)(lh.parahippocampal\_3)  
4843 0.85266 (lh.paracentral\_4)(lh.precentral\_2)(lh.precentral\_4)  
4844 0.85266 (lh.paracentral\_4)(lh.superiorfrontal\_14)  
4845 0.85266 (lh.parstriangularis\_2)(lh.parstriangularis\_3)(lh.rostralmiddlefrontal\_6)  
4846 0.85266 (lh.posteriorcingulate\_3)(lh.precentral\_11)  
4847 0.85266 (lh.precentral\_7)(lh.supramarginal\_9)  
4848 0.85266 (lh.precuneus\_2)(lh.superiorparietal\_5)  
4849 0.85266 (lh.precuneus\_3)(lh.superiorparietal\_2)  
4850 0.85266 (lh.precuneus\_4)(lh.superiorparietal\_9)

4851 0.85266 (lh.rostralanteriorcingulate\_2)(lh.rostralmiddlefrontal\_4)(lh.rostralmiddlefrontal\_8)  
4852 0.85266 (lh.rostralanteriorcingulate\_2)(lh.superiorfrontal\_11)(lh.superiorfrontal\_4)(lh.superiorfrontal\_8)  
4853 0.85266 (lh.superiorfrontal\_11)(lh.superiorfrontal\_4)(lh.superiorfrontal\_6)(lh.superiorfrontal\_8)  
4854 0.85266 (lh.superiorfrontal\_11)(lh.superiorfrontal\_6)(lh.superiorfrontal\_8)  
4855 0.85266 (lh.superiorfrontal\_14)(lh.superiorfrontal\_4)(lh.superiorfrontal\_9)  
4856 0.85266 (rh.bankssts\_1)(rh.bankssts\_2)(rh.middletemporal\_1)  
4857 0.85266 (rh.fusiform\_2)(rh.fusiform\_3)(rh.fusiform\_4)  
4858 0.85266 (rh.fusiform\_3)(rh.inferiorparietal\_10)  
4859 0.85266 (rh.fusiform\_3)(rh.inferiortemporal\_6)(rh.inferiortemporal\_7)  
4860 0.85266 (rh.inferiortemporal\_5)(rh.inferiortemporal\_6)(rh.inferiortemporal\_7)  
4861 0.85266 (rh.insula\_2)(rh.precentral\_13)(rh.precentral\_7)  
4862 0.85266 (rh.insula\_7)(rh.parsopercularis\_4)(rh.parstriangularis\_1)  
4863 0.85266 (rh.lateralorbitofrontal\_6)(rh.lateralorbitofrontal\_7)(rh.rostralmiddlefrontal\_12)(rh.rostralmiddlefrontal\_13)  
4864 0.85266 (rh.lateralorbitofrontal\_6)(rh.parstriangularis\_1)(rh.rostralmiddlefrontal\_3)  
4865 0.85266 (rh.lateralorbitofrontal\_7)(rh.medialorbitofrontal\_2)(rh.rostralmiddlefrontal\_12)(rh.superiorfrontal\_2)  
4866 0.85266 (rh.lateralorbitofrontal\_7)(rh.parstriangularis\_4)  
4867 0.85266 (rh.parsopercularis\_4)(rh.rostralmiddlefrontal\_5)  
4868 0.85266 (rh.parsopercularis\_4)(rh.superiorfrontal\_7)  
4869 0.85266 (rh.parstriangularis\_1)(rh.parstriangularis\_2)(rh.parstriangularis\_3)(rh.parstriangularis\_4)  
4870 0.85266 (rh.pericalcarine\_2)(rh.pericalcarine\_4)  
4871 0.85266 (rh.postcentral\_10)(rh.supramarginal\_8)  
4872 0.85266 (rh.postcentral\_5)(rh.supramarginal\_6)  
4873 0.85266 (rh.precentral\_12)(rh.precentral\_7)  
4874 0.85266 (rh.precuneus\_1)(rh.precuneus\_2)(rh.superiorparietal\_11)  
4875 0.85266 (rh.precuneus\_8)(rh.superiorparietal\_5)  
4876 0.85266 (rh.superiorparietal\_2)(rh.superiorparietal\_7)  
4877 0.85266 (Right-Amygdala)(Right-Hippocampus)(rh.fusiform\_8)  
4878 0.85266 (Right-Caudate)(rh.precentral\_5)(rh.precentral\_6)  
4879 0.85266 (Right-Caudate)(rh.rostralmiddlefrontal\_3)(rh.rostralmiddlefrontal\_8)  
4880 0.85266 (Right-Caudate)(Right-Pallidum)(rh.parsopercularis\_4)  
4881 0.85266 (Right-Caudate)(Right-Pallidum)(rh.posteriorcingulate\_2)(rh.precentral\_13)  
4882 0.85266 (Right-Caudate)(Right-Pallidum)(Right-Putamen)(rh.parsopercularis\_4)  
4883 0.85266 (Right-Hippocampus)(rh.bankssts\_1)(rh.middletemporal\_4)  
4884 0.85266 (Right-Pallidum)(rh.posteriorcingulate\_2)(rh.precentral\_13)  
4885 0.85266 (Right-Putamen)(rh.caudalmiddlefrontal\_5)(rh.superiorfrontal\_7)  
4886 0.85266 (Right-Putamen)(rh.insula\_2)(rh.precentral\_13)(rh.precentral\_7)  
4887 0.85266 (Right-Putamen)(rh.lateralorbitofrontal\_2)(rh.parstriangularis\_1)(rh.rostralmiddlefrontal\_12)(rh.rostralmiddlefrontal\_8)  
4888 0.85266 (Right-Putamen)(rh.lateralorbitofrontal\_7)(rh.parstriangularis\_1)(rh.rostralmiddlefrontal\_12)(rh.rostralmiddlefrontal\_8)  
4889 0.85266 (Right-Putamen)(rh.rostralmiddlefrontal\_11)(rh.rostralmiddlefrontal\_8)  
4890 0.85266 (Right-Putamen)(rh.rostralmiddlefrontal\_8)(rh.rostralmiddlefrontal\_9)  
4891 0.85266 (Right-Putamen)(rh.superiorparietal\_1)(rh.supramarginal\_8)(rh.supramarginal\_9)  
4892 0.85024 (Left-Accumbens-area)(Left-Caudate)(Left-Putamen)(lh.medialorbitofrontal\_4)  
4893 0.85024 (Left-Accumbens-area)(Left-Putamen)(lh.lateralorbitofrontal\_3)  
4894 0.85024 (Left-Caudate)(Left-Putamen)(lh.caudalanteriorcingulate\_2)(lh.superiorfrontal\_11)(lh.superiorfrontal\_14)  
4895 0.85024 (Left-Caudate)(Left-Putamen)(lh.lateralorbitofrontal\_4)(lh.parstriangularis\_3)(lh.rostralmiddlefrontal\_9)  
4896 0.85024 (Left-Caudate)(Left-Putamen)(lh.lateralorbitofrontal\_6)(lh.rostralmiddlefrontal\_1)  
4897 0.85024 (Left-Caudate)(Left-Putamen)(lh.lateralorbitofrontal\_7)(lh.medialorbitofrontal\_2)(lh.rostralanteriorcingulate\_1)(lh.rostralmiddlefrontal\_12)  
4898 0.85024 (Left-Caudate)(Left-Putamen)(lh.lateralorbitofrontal\_7)(lh.medialorbitofrontal\_2)(lh.rostralanteriorcingulate\_1)(lh.rostralmiddlefrontal\_9)  
4899 0.85024 (Left-Caudate)(Left-Putamen)(lh.parstriangularis\_3)(lh.rostralanteriorcingulate\_2)  
4900 0.85024 (Left-Caudate)(Left-Putamen)(lh.superiorfrontal\_3)

4901 0.85024 (Left-Caudate)(Left-Thalamus-Proper)(lh.postcentral\_3)  
4902 0.85024 (Left-Caudate)(lh.caudalanteriorcingulate\_2)(lh.posteriorcingulate\_1)(lh.superiorfrontal\_12)  
4903 0.85024 (Left-Caudate)(lh.caudalanteriorcingulate\_2)(lh.superiorfrontal\_4)(lh.superiorfrontal\_8)  
4904 0.85024 (Left-Caudate)(lh.caudalmiddlefrontal\_3)(lh.insula\_6)(lh.rostralmiddlefrontal\_4)  
4905 0.85024 (Left-Caudate)(lh.caudalmiddlefrontal\_3)(lh.parstriangularis\_3)(lh.rostralmiddlefrontal\_1)  
4906 0.85024 (Left-Caudate)(lh.caudalmiddlefrontal\_3)(lh.rostralmiddlefrontal\_1)(lh.rostralmiddlefrontal\_9)  
4907 0.85024 (Left-Caudate)(lh.caudalmiddlefrontal\_3)(lh.rostralmiddlefrontal\_3)  
4908 0.85024 (Left-Caudate)(lh.caudalmiddlefrontal\_4)(lh.caudalmiddlefrontal\_6)(lh.precentral\_9)  
4909 0.85024 (Left-Caudate)(lh.lateralorbitofrontal\_6)(lh.lateralorbitofrontal\_7)(lh.rostralmiddlefrontal\_12)  
4910 0.85024 (Left-Caudate)(lh.lateralorbitofrontal\_6)(lh.lateralorbitofrontal\_7)(lh.rostralmiddlefrontal\_9)  
4911 0.85024 (Left-Caudate)(lh.lateralorbitofrontal\_7)(lh.parstriangularis\_3)(lh.rostralmiddlefrontal\_12)(lh.rostralmiddlefrontal\_9)  
4912 0.85024 (Left-Caudate)(lh.medialorbitofrontal\_5)(lh.rostralanteriorcingulate\_1)  
4913 0.85024 (Left-Caudate)(lh.parsopercularis\_1)(lh.parsopercularis\_3)  
4914 0.85024 (Left-Caudate)(lh.postcentral\_8)(lh.precentral\_14)  
4915 0.85024 (Left-Caudate)(lh.posteriorcingulate\_3)(lh.precentral\_11)  
4916 0.85024 (Left-Caudate)(lh.superiorfrontal\_11)(lh.superiorfrontal\_12)(lh.superiorfrontal\_4)  
4917 0.85024 (Left-Hippocampus)(lh.insula\_1)(lh.supramarginal\_1)  
4918 0.85024 (Left-Hippocampus)(lh.superiortemporal\_3)(lh.superiortemporal\_6)(lh.superiortemporal\_8)  
4919 0.85024 (Left-Pallidum)(Left-Putamen)(Left-Thalamus-Proper)(lh.precentral\_9)  
4920 0.85024 (Left-Pallidum)(Left-Putamen)(lh.precentral\_7)  
4921 0.85024 (Left-Pallidum)(Left-Thalamus-Proper)(lh.precentral\_9)  
4922 0.85024 (Left-Putamen)(lh.caudalanteriorcingulate\_1)(lh.rostralmiddlefrontal\_4)  
4923 0.85024 (Left-Putamen)(lh.caudalanteriorcingulate\_2)(lh.rostralanteriorcingulate\_2)(lh.superiorfrontal\_11)  
4924 0.85024 (Left-Putamen)(lh.lateralorbitofrontal\_4)(lh.lateralorbitofrontal\_7)(lh.parstriangularis\_3)(lh.rostralmiddlefrontal\_12)(lh.rostralmiddlefrontal\_9)  
4925 0.85024 (Left-Putamen)(lh.lateralorbitofrontal\_4)(lh.parstriangularis\_3)(lh.rostralanteriorcingulate\_1)  
4926 0.85024 (Left-Putamen)(lh.lateralorbitofrontal\_4)(lh.rostralanteriorcingulate\_1)(lh.rostralmiddlefrontal\_12)  
4927 0.85024 (Left-Putamen)(lh.medialorbitofrontal\_2)(lh.rostralanteriorcingulate\_1)(lh.rostralmiddlefrontal\_12)(lh.superiorfrontal\_3)  
4928 0.85024 (Left-Putamen)(lh.medialorbitofrontal\_2)(lh.rostralanteriorcingulate\_1)(lh.rostralmiddlefrontal\_9)(lh.superiorfrontal\_3)  
4929 0.85024 (Left-Putamen)(lh.parsopercularis\_1)(lh.parsopercularis\_3)(lh.parstriangularis\_3)(lh.rostralmiddlefrontal\_1)  
4930 0.85024 (Left-Putamen)(lh.parstriangularis\_3)(lh.rostralanteriorcingulate\_1)(lh.rostralanteriorcingulate\_2)  
4931 0.85024 (Left-Putamen)(lh.postcentral\_8)(lh.precentral\_11)(lh.precentral\_4)  
4932 0.85024 (Left-Putamen)(lh.rostralanteriorcingulate\_1)(lh.rostralmiddlefrontal\_4)(lh.superiorfrontal\_4)  
4933 0.85024 (lh.caudalanteriorcingulate\_1)(lh.caudalanteriorcingulate\_2)(lh.superiorfrontal\_8)  
4934 0.85024 (lh.caudalanteriorcingulate\_2)(lh.superiorfrontal\_14)(lh.superiorfrontal\_4)  
4935 0.85024 (lh.cuneus\_1)(lh.pericalcarine\_1)(lh.superiorparietal\_14)  
4936 0.85024 (lh.cuneus\_2)(lh.lateraloccipital\_1)  
4937 0.85024 (lh.fusiform\_1)(lh.lateraloccipital\_7)  
4938 0.85024 (lh.fusiform\_2)(lh.lateraloccipital\_10)(lh.lateraloccipital\_7)  
4939 0.85024 (lh.fusiform\_2)(lh.lateraloccipital\_7)(lh.lateraloccipital\_8)  
4940 0.85024 (lh.inferiorparietal\_4)(lh.inferiorparietal\_6)  
4941 0.85024 (lh.inferiorparietal\_5)(lh.lingual\_8)  
4942 0.85024 (lh.insula\_1)(lh.precentral\_16)  
4943 0.85024 (lh.insula\_1)(lh.superiorparietal\_5)(lh.supramarginal\_9)  
4944 0.85024 (lh.insula\_1)(lh.supramarginal\_1)(lh.supramarginal\_2)(lh.supramarginal\_4)  
4945 0.85024 (lh.insula\_1)(lh.supramarginal\_6)(lh.supramarginal\_9)  
4946 0.85024 (lh.insula\_6)(lh.rostralmiddlefrontal\_4)(lh.rostralmiddlefrontal\_9)  
4947 0.85024 (lh.lateraloccipital\_6)(lh.lateraloccipital\_7)(lh.lateraloccipital\_8)  
4948 0.85024 (lh.lateraloccipital\_6)(lh.lingual\_6)  
4949 0.85024 (lh.lateralorbitofrontal\_4)(lh.lateralorbitofrontal\_6)(lh.parstriangularis\_1)  
4950 0.85024 (lh.lateralorbitofrontal\_5)(lh.parstriangularis\_1)

4951 0.85024 (lh.lateralorbitofrontal\_6)(lh.rostralmiddlefrontal\_1)(lh.rostralmiddlefrontal\_12)(lh.rostralmiddlefrontal\_9)  
4952 0.85024 (lh.lateralorbitofrontal\_6)(lh.rostralmiddlefrontal\_10)  
4953 0.85024 (lh.lateralorbitofrontal\_7)(lh.parstriangularis\_3)(lh.rostralmiddlefrontal\_12)(lh.rostralmiddlefrontal\_6)  
4954 0.85024 (lh.lateralorbitofrontal\_7)(lh.rostralmiddlefrontal\_1)  
4955 0.85024 (lh.medialorbitofrontal\_2)(lh.superiorfrontal\_1)(lh.superiorfrontal\_3)(lh.superiorfrontal\_4)  
4956 0.85024 (lh.medialorbitofrontal\_2)(lh.superiorfrontal\_1)(lh.superiorfrontal\_4)  
4957 0.85024 (lh.paracentral\_5)(lh.posteriorcingulate\_3)(lh.precentral\_4)  
4958 0.85024 (lh.pericalcarine\_1)(lh.pericalcarine\_2)(lh.superiorparietal\_12)  
4959 0.85024 (lh.posteriorcingulate\_2)(lh.posteriorcingulate\_3)  
4960 0.85024 (lh.posteriorcingulate\_3)(lh.precentral\_4)(lh.superiorfrontal\_14)  
4961 0.85024 (lh.precuneus\_3)(lh.precuneus\_6)(lh.superiorparietal\_7)  
4962 0.85024 (lh.precuneus\_5)(lh.precuneus\_6)(lh.precuneus\_8)  
4963 0.85024 (lh.rostralantiorcingulate\_1)(lh.rostralmiddlefrontal\_12)(lh.rostralmiddlefrontal\_9)(lh.superiorfrontal\_4)  
4964 0.85024 (lh.rostralantiorcingulate\_1)(lh.rostralmiddlefrontal\_12)(lh.superiorfrontal\_3)(lh.superiorfrontal\_4)  
4965 0.85024 (lh.rostralmiddlefrontal\_6)(lh.rostralmiddlefrontal\_7)(lh.rostralmiddlefrontal\_9)  
4966 0.85024 (lh.superiorfrontal\_14)(lh.superiorfrontal\_15)(lh.superiorfrontal\_16)(lh.superiorfrontal\_17)  
4967 0.85024 (lh.superiorfrontal\_14)(lh.superiorfrontal\_15)(lh.superiorfrontal\_17)(lh.superiorfrontal\_18)  
4968 0.85024 (lh.superiorparietal\_3)(lh.superiorparietal\_5)(lh.supramarginal\_9)  
4969 0.85024 (lh.superiortemporal\_10)(lh.superiortemporal\_11)  
4970 0.85024 (lh.supramarginal\_1)(lh.supramarginal\_4)(lh.supramarginal\_9)  
4971 0.85024 (lh.supramarginal\_2)(lh.supramarginal\_9)  
4972 0.85024 (lh.supramarginal\_4)(lh.supramarginal\_6)  
4973 0.85024 (rh.bankssts\_1)(rh.inferiortemporal\_6)(rh.middletemporal\_1)  
4974 0.85024 (rh.caudalmiddlefrontal\_4)(rh.caudalmiddlefrontal\_5)(rh.superiorfrontal\_13)  
4975 0.85024 (rh.caudalmiddlefrontal\_4)(rh.precentral\_13)(rh.precentral\_7)  
4976 0.85024 (rh.fusiform\_6)(rh.middletemporal\_1)  
4977 0.85024 (rh.inferiorparietal\_10)(rh.lateraloccipital\_10)(rh.middletemporal\_1)  
4978 0.85024 (rh.inferiorparietal\_12)(rh.precuneus\_1)(rh.superiorparietal\_11)  
4979 0.85024 (rh.inferiorparietal\_9)(rh.middletemporal\_1)  
4980 0.85024 (rh.inferiortemporal\_4)(rh.inferiortemporal\_6)  
4981 0.85024 (rh.insula\_7)(rh.lateralorbitofrontal\_6)  
4982 0.85024 (rh.isthmuscingulate\_1)(rh.posteriorcingulate\_4)  
4983 0.85024 (rh.lateraloccipital\_1)(rh.pericalcarine\_2)(rh.superiorparietal\_11)  
4984 0.85024 (rh.lateraloccipital\_4)(rh.lateraloccipital\_5)(rh.lateraloccipital\_7)(rh.lateraloccipital\_8)  
4985 0.85024 (rh.lateraloccipital\_5)(rh.lateraloccipital\_7)(rh.lingual\_2)  
4986 0.85024 (rh.lateralorbitofrontal\_7)(rh.rostralmiddlefrontal\_11)(rh.rostralmiddlefrontal\_8)  
4987 0.85024 (rh.lingual\_2)(rh.lingual\_4)(rh.pericalcarine\_1)  
4988 0.85024 (rh.parstriangularis\_1)(rh.rostralmiddlefrontal\_6)  
4989 0.85024 (rh.postcentral\_4)(rh.precentral\_6)  
4990 0.85024 (rh.precentral\_11)(rh.precentral\_13)(rh.precentral\_15)  
4991 0.85024 (rh.precuneus\_10)(rh.superiorparietal\_6)  
4992 0.85024 (rh.precuneus\_4)(rh.precuneus\_7)(rh.superiorparietal\_8)  
4993 0.85024 (rh.rostralmiddlefrontal\_1)(rh.rostralmiddlefrontal\_2)(rh.rostralmiddlefrontal\_3)  
4994 0.85024 (rh.rostralmiddlefrontal\_10)(rh.superiorfrontal\_4)  
4995 0.85024 (rh.rostralmiddlefrontal\_12)(rh.rostralmiddlefrontal\_3)(rh.rostralmiddlefrontal\_5)  
4996 0.85024 (rh.rostralmiddlefrontal\_3)(rh.superiorfrontal\_7)  
4997 0.85024 (rh.rostralmiddlefrontal\_8)(rh.superiorfrontal\_1)(rh.superiorfrontal\_2)  
4998 0.85024 (rh.superiorfrontal\_13)(rh.superiorfrontal\_5)(rh.superiorfrontal\_8)  
4999 0.85024 (Right-Caudate)(rh.caudalanteriorcingulate\_2)(rh.superiorfrontal\_7)  
5000 0.85024 (Right-Caudate)(rh.paracentral\_4)

5001 0.85024 (Right-Caudate)(rh.rostralmiddlefrontal\_12)(rh.rostralmiddlefrontal\_8)  
5002 0.85024 (Right-Caudate)(Right-Pallidum)(Right-Putamen)(rh.posteriorcingulate\_2)(rh.precentral\_13)  
5003 0.85024 (Right-Caudate)(Right-Putamen)(rh.caudalanteriorcingulate\_1)(rh.rostralanteriorcingulate\_2)  
5004 0.85024 (Right-Caudate)(Right-Putamen)(rh.lateralorbitofrontal\_5)(rh.lateralorbitofrontal\_7)(rh.medialorbitofrontal\_2)  
5005 0.85024 (Right-Caudate)(Right-Thalamus-Proprius)(rh.insula\_1)(rh.precentral\_11)  
5006 0.85024 (Right-Caudate)(Right-Thalamus-Proprius)(rh.isthmuscingulate\_1)  
5007 0.85024 (Right-Hippocampus)(rh.bankssts\_2)(rh.inferiorparietal\_10)(rh.inferiorparietal\_4)  
5008 0.85024 (Right-Hippocampus)(rh.fusiform\_8)(rh.superiortemporal\_10)  
5009 0.85024 (Right-Hippocampus)(rh.inferiorparietal\_10)(rh.inferiorparietal\_9)  
5010 0.85024 (Right-Hippocampus)(rh.precuneus\_2)(rh.precuneus\_7)  
5011 0.85024 (Right-Hippocampus)(Right-Thalamus-Proprius)(rh.insula\_1)(rh.supramarginal\_9)  
5012 0.85024 (Right-Pallidum)(Right-Putamen)(rh.posteriorcingulate\_2)(rh.precentral\_13)  
5013 0.85024 (Right-Putamen)(rh.caudalanteriorcingulate\_1)(rh.rostralanteriorcingulate\_2)  
5014 0.85024 (Right-Putamen)(rh.insula\_3)(rh.precentral\_5)(rh.precentral\_6)  
5015 0.85024 (Right-Putamen)(rh.insula\_7)(rh.lateralorbitofrontal\_6)  
5016 0.85024 (Right-Putamen)(rh.lateralorbitofrontal\_6)(rh.medialorbitofrontal\_2)(rh.rostralmiddlefrontal\_13)  
5017 0.85024 (Right-Putamen)(rh.medialorbitofrontal\_3)  
5018 0.84783 (Left-Accumbens-area)(Left-Thalamus-Proprius)(Right-Caudate)  
5019 0.84783 (Left-Caudate)(Left-Putamen)(lh.caudalmiddlefrontal\_3)(lh.insula\_6)(lh.rostralmiddlefrontal\_4)  
5020 0.84783 (Left-Caudate)(Left-Putamen)(lh.caudalmiddlefrontal\_4)(lh.superiorfrontal\_12)  
5021 0.84783 (Left-Caudate)(Left-Putamen)(lh.parstriangularis\_3)(lh.rostralanteriorcingulate\_1)(lh.rostralmiddlefrontal\_12)(lh.rostralmiddlefrontal\_9)  
5022 0.84783 (Left-Caudate)(Left-Putamen)(lh.rostralanteriorcingulate\_1)(lh.rostralmiddlefrontal\_1)(lh.rostralmiddlefrontal\_9)  
5023 0.84783 (Left-Caudate)(lh.caudalmiddlefrontal\_3)(lh.rostralmiddlefrontal\_4)(lh.superiorfrontal\_11)  
5024 0.84783 (Left-Caudate)(lh.insula\_6)(lh.rostralanteriorcingulate\_1)  
5025 0.84783 (Left-Caudate)(lh.lateralorbitofrontal\_4)(lh.lateralorbitofrontal\_6)(lh.parstriangularis\_3)  
5026 0.84783 (Left-Caudate)(lh.lateralorbitofrontal\_4)(lh.lateralorbitofrontal\_7)(lh.parstriangularis\_3)  
5027 0.84783 (Left-Caudate)(lh.lateralorbitofrontal\_6)(lh.parstriangularis\_3)(lh.rostralmiddlefrontal\_12)  
5028 0.84783 (Left-Caudate)(lh.paracentral\_5)(lh.precentral\_4)(lh.superiorfrontal\_14)  
5029 0.84783 (Left-Caudate)(lh.posteriorcingulate\_2)(lh.posteriorcingulate\_3)  
5030 0.84783 (Left-Hippocampus)(lh.fusiform\_4)(lh.fusiform\_5)  
5031 0.84783 (Left-Hippocampus)(lh.isthmuscingulate\_3)(lh.parahippocampal\_3)  
5032 0.84783 (Left-Pallidum)(Left-Thalamus-Proprius)(lh.precentral\_11)(lh.precentral\_4)  
5033 0.84783 (Left-Putamen)(lh.caudalmiddlefrontal\_1)(lh.caudalmiddlefrontal\_3)(lh.rostralmiddlefrontal\_4)  
5034 0.84783 (Left-Putamen)(lh.insula\_3)(lh.precentral\_12)  
5035 0.84783 (Left-Putamen)(lh.parstriangularis\_3)(lh.rostralanteriorcingulate\_1)(lh.rostralmiddlefrontal\_4)  
5036 0.84783 (Left-Putamen)(lh.precentral\_4)(lh.superiorfrontal\_14)  
5037 0.84783 (lh.bankssts\_2)(lh.inferiortemporal\_6)(lh.inferiortemporal\_7)  
5038 0.84783 (lh.bankssts\_3)(lh.inferiortemporal\_8)  
5039 0.84783 (lh.caudalanteriorcingulate\_2)(lh.rostralanteriorcingulate\_2)(lh.superiorfrontal\_11)(lh.superiorfrontal\_8)  
5040 0.84783 (lh.caudalmiddlefrontal\_3)(lh.insula\_6)(lh.rostralmiddlefrontal\_1)(lh.rostralmiddlefrontal\_4)  
5041 0.84783 (lh.caudalmiddlefrontal\_4)(lh.caudalmiddlefrontal\_6)(lh.precentral\_11)(lh.precentral\_9)  
5042 0.84783 (lh.fusiform\_2)(lh.lateraloccipital\_10)(lh.lateraloccipital\_9)  
5043 0.84783 (lh.fusiform\_2)(lh.lateraloccipital\_11)(lh.lateraloccipital\_6)(lh.pericalcarine\_3)  
5044 0.84783 (lh.fusiform\_2)(lh.lingual\_1)(lh.pericalcarine\_2)  
5045 0.84783 (lh.fusiform\_4)(lh.fusiform\_5)(lh.fusiform\_7)  
5046 0.84783 (lh.fusiform\_8)(lh.inferiortemporal\_1)  
5047 0.84783 (lh.inferiortemporal\_1)(lh.inferiortemporal\_3)  
5048 0.84783 (lh.insula\_3)(lh.precentral\_9)  
5049 0.84783 (lh.insula\_6)(lh.rostralanteriorcingulate\_2)  
5050 0.84783 (lh.isthmuscingulate\_2)(lh.isthmuscingulate\_3)(lh.precuneus\_10)(lh.precuneus\_6)

5051 0.84783 (lh.lateraloccipital\_1)(lh.lateraloccipital\_3)(lh.pericalcarine\_1)(lh.pericalcarine\_2)  
5052 0.84783 (lh.lateraloccipital\_11)(lh.lateraloccipital\_3)(lh.lingual\_1)(lh.pericalcarine\_2)  
5053 0.84783 (lh.lateraloccipital\_2)(lh.pericalcarine\_1)(lh.superiorparietal\_12)  
5054 0.84783 (lh.lateralorbitofrontal\_2)(lh.lateralorbitofrontal\_7)(lh.medialorbitofrontal\_5)  
5055 0.84783 (lh.lateralorbitofrontal\_3)(lh.lateralorbitofrontal\_5)  
5056 0.84783 (lh.lateralorbitofrontal\_6)(lh.medialorbitofrontal\_2)(lh.rostralmiddlefrontal\_9)  
5057 0.84783 (lh.lateralorbitofrontal\_6)(lh.parstriangularis\_3)(lh.rostralmiddlefrontal\_1)(lh.rostralmiddlefrontal\_12)(lh.rostralmiddlefrontal\_9)  
5058 0.84783 (lh.lateralorbitofrontal\_7)(lh.parstriangularis\_3)(lh.rostralmiddlefrontal\_6)(lh.rostralmiddlefrontal\_9)  
5059 0.84783 (lh.medialorbitofrontal\_2)(lh.parstriangularis\_3)(lh.rostralanteriorcingulate\_1)(lh.rostralmiddlefrontal\_9)  
5060 0.84783 (lh.paracentral\_4)(lh.paracentral\_5)(lh.precentral\_2)(lh.precentral\_4)  
5061 0.84783 (lh.postcentral\_14)(lh.postcentral\_8)  
5062 0.84783 (lh.postcentral\_14)(lh.supramarginal\_3)  
5063 0.84783 (lh.postcentral\_4)(lh.posteriorcingulate\_4)  
5064 0.84783 (lh.postcentral\_8)(lh.precentral\_16)  
5065 0.84783 (lh.precentral\_11)(lh.precentral\_5)(lh.precentral\_7)  
5066 0.84783 (lh.precuneus\_10)(lh.superiorparietal\_6)  
5067 0.84783 (lh.precuneus\_9)(lh.superiorparietal\_13)  
5068 0.84783 (lh.rostralanteriorcingulate\_2)(lh.rostralmiddlefrontal\_4)(lh.superiorfrontal\_10)  
5069 0.84783 (lh.rostralanteriorcingulate\_2)(lh.rostralmiddlefrontal\_8)(lh.rostralmiddlefrontal\_9)  
5070 0.84783 (lh.rostralmiddlefrontal\_12)(lh.rostralmiddlefrontal\_9)(lh.superiorfrontal\_3)(lh.superiorfrontal\_4)  
5071 0.84783 (lh.rostralmiddlefrontal\_4)(lh.rostralmiddlefrontal\_7)(lh.rostralmiddlefrontal\_9)  
5072 0.84783 (lh.rostralmiddlefrontal\_4)(lh.rostralmiddlefrontal\_8)(lh.rostralmiddlefrontal\_9)(lh.superiorfrontal\_4)  
5073 0.84783 (lh.rostralmiddlefrontal\_8)(lh.superiorfrontal\_1)  
5074 0.84783 (lh.superiorparietal\_12)(lh.superiorparietal\_14)  
5075 0.84783 (lh.supramarginal\_10)(lh.supramarginal\_7)  
5076 0.84783 (rh.bankssts\_1)(rh.inferiortemporal\_6)(rh.inferiortemporal\_7)  
5077 0.84783 (rh.fusiform\_1)(rh.lateraloccipital\_5)(rh.lateraloccipital\_7)  
5078 0.84783 (rh.fusiform\_1)(rh.lingual\_2)(rh.pericalcarine\_3)  
5079 0.84783 (rh.fusiform\_2)(rh.fusiform\_3)(rh.lateraloccipital\_8)  
5080 0.84783 (rh.fusiform\_5)(rh.inferiorparietal\_10)(rh.lateraloccipital\_10)  
5081 0.84783 (rh.inferiorparietal\_1)(rh.inferiorparietal\_4)(rh.superiorparietal\_1)  
5082 0.84783 (rh.insula\_1)(rh.superiorparietal\_1)(rh.supramarginal\_1)(rh.supramarginal\_8)  
5083 0.84783 (rh.insula\_5)(rh.temporalpole\_1)  
5084 0.84783 (rh.lateraloccipital\_4)(rh.lateraloccipital\_8)(rh.pericalcarine\_3)  
5085 0.84783 (rh.lateraloccipital\_8)(rh.lingual\_7)(rh.pericalcarine\_1)  
5086 0.84783 (rh.lateralorbitofrontal\_2)(rh.lateralorbitofrontal\_4)(rh.lateralorbitofrontal\_6)(rh.lateralorbitofrontal\_7)  
5087 0.84783 (rh.lateralorbitofrontal\_6)(rh.parstriangularis\_1)(rh.parstriangularis\_3)(rh.parstriangularis\_4)  
5088 0.84783 (rh.medialorbitofrontal\_2)(rh.rostralmiddlefrontal\_12)(rh.rostralmiddlefrontal\_13)  
5089 0.84783 (rh.paracentral\_4)(rh.precentral\_13)(rh.superiorfrontal\_16)  
5090 0.84783 (rh.paracentral\_4)(rh.superiorfrontal\_14)(rh.superiorfrontal\_16)  
5091 0.84783 (rh.parstriangularis\_1)(rh.parstriangularis\_3)(rh.rostralmiddlefrontal\_12)  
5092 0.84783 (rh.postcentral\_1)(rh.precentral\_3)  
5093 0.84783 (rh.postcentral\_3)(rh.precentral\_1)  
5094 0.84783 (rh.precentral\_13)(rh.precentral\_7)(rh.precentral\_8)  
5095 0.84783 (rh.precuneus\_1)(rh.precuneus\_4)(rh.superiorparietal\_10)(rh.superiorparietal\_11)  
5096 0.84783 (rh.rostralmiddlefrontal\_9)(rh.superiorfrontal\_2)(rh.superiorfrontal\_5)(rh.superiorfrontal\_7)  
5097 0.84783 (rh.superiorfrontal\_10)(rh.superiorfrontal\_13)(rh.superiorfrontal\_8)  
5098 0.84783 (Right-Caudate)(rh.caudalanteriorcingulate\_2)(rh.superiorfrontal\_11)  
5099 0.84783 (Right-Caudate)(rh.caudalmiddlefrontal\_2)  
5100 0.84783 (Right-Caudate)(rh.caudalmiddlefrontal\_4)(rh.insula\_7)(rh.parsopercularis\_4)

5101 0.84783 (Right-Caudate)(rh.parstriangularis\_1)(rh.rostralmiddlefrontal\_3)  
5102 0.84783 (Right-Caudate)(rh.superiorfrontal\_11)(rh.superiorfrontal\_13)(rh.superiorfrontal\_9)  
5103 0.84783 (Right-Caudate)(rh.superiorfrontal\_13)(rh.superiorfrontal\_7)  
5104 0.84783 (Right-Caudate)(Right-Putamen)(rh.caudalmiddlefrontal\_4)(rh.insula\_7)(rh.parsopercularis\_4)  
5105 0.84783 (Right-Caudate)(Right-Putamen)(rh.medialorbitofrontal\_3)  
5106 0.84783 (Right-Caudate)(Right-Putamen)(rh.rostralmiddlefrontal\_12)(rh.rostralmiddlefrontal\_8)  
5107 0.84783 (Right-Caudate)(Right-Putamen)(Right-Thalamus-Proper)(rh.insula\_1)(rh.precentral\_11)  
5108 0.84783 (Right-Hippocampus)(rh.isthmuscingulate\_2)(rh.precuneus\_3)(rh.precuneus\_4)  
5109 0.84783 (Right-Hippocampus)(Right-Putamen)(Right-Thalamus-Proper)(rh.insula\_1)(rh.supramarginal\_9)  
5110 0.84783 (Right-Putamen)(rh.caudalmiddlefrontal\_4)(rh.precentral\_13)(rh.precentral\_7)  
5111 0.84783 (Right-Putamen)(rh.insula\_3)(rh.postcentral\_1)  
5112 0.84783 (Right-Putamen)(rh.insula\_7)(rh.parsopercularis\_4)(rh.parstriangularis\_1)  
5113 0.84783 (Right-Putamen)(rh.insula\_7)(rh.rostralmiddlefrontal\_5)  
5114 0.84783 (Right-Putamen)(rh.precentral\_11)(rh.precentral\_12)  
5115 0.84783 (Right-Putamen)(rh.precentral\_13)(rh.superiorfrontal\_14)  
5116 0.84541 (Left-Accumbens-area)(Left-Caudate)(Left-Hippocampus)(Left-Thalamus-Proper)  
5117 0.84541 (Left-Accumbens-area)(Left-Caudate)(Left-Hippocampus)  
5118 0.84541 (Left-Caudate)(Left-Pallidum)(Left-Putamen)(Left-Thalamus-Proper)(lh.posteriorcingulate\_3)  
5119 0.84541 (Left-Caudate)(Left-Pallidum)(Left-Thalamus-Proper)(lh.precentral\_11)(lh.precentral\_4)  
5120 0.84541 (Left-Caudate)(Left-Putamen)(Left-Thalamus-Proper)(lh.insula\_1)(lh.precentral\_11)(lh.precentral\_7)  
5121 0.84541 (Left-Caudate)(Left-Putamen)(Left-Thalamus-Proper)(lh.supramarginal\_1)  
5122 0.84541 (Left-Caudate)(Left-Putamen)(lh.caudalanteriorcingulate\_2)(lh.rostralanteriorcingulate\_2)(lh.superiorfrontal\_11)  
5123 0.84541 (Left-Caudate)(Left-Putamen)(lh.insula\_6)(lh.rostralanteriorcingulate\_1)  
5124 0.84541 (Left-Caudate)(Left-Putamen)(lh.insula\_6)(lh.rostralmiddlefrontal\_1)(lh.rostralmiddlefrontal\_9)  
5125 0.84541 (Left-Caudate)(Left-Putamen)(lh.medialorbitofrontal\_2)(lh.rostralanteriorcingulate\_1)(lh.superiorfrontal\_4)  
5126 0.84541 (Left-Caudate)(Left-Putamen)(lh.precentral\_7)(lh.precentral\_9)  
5127 0.84541 (Left-Caudate)(Left-Putamen)(lh.superiorfrontal\_10)(lh.superiorfrontal\_4)  
5128 0.84541 (Left-Caudate)(Left-Thalamus-Proper)(lh.insula\_1)(lh.precentral\_11)(lh.precentral\_7)  
5129 0.84541 (Left-Caudate)(Left-Thalamus-Proper)(lh.insula\_1)(lh.supramarginal\_1)  
5130 0.84541 (Left-Caudate)(lh.caudalanteriorcingulate\_2)(lh.caudalmiddlefrontal\_3)(lh.caudalmiddlefrontal\_5)  
5131 0.84541 (Left-Caudate)(lh.insula\_6)(lh.parstriangularis\_3)(lh.rostralmiddlefrontal\_4)  
5132 0.84541 (Left-Caudate)(lh.lateralorbitofrontal\_4)(lh.lateralorbitofrontal\_6)(lh.rostralmiddlefrontal\_9)  
5133 0.84541 (Left-Caudate)(lh.lateralorbitofrontal\_4)(lh.rostralmiddlefrontal\_12)(lh.rostralmiddlefrontal\_9)  
5134 0.84541 (Left-Caudate)(lh.medialorbitofrontal\_2)(lh.rostralmiddlefrontal\_9)(lh.superiorfrontal\_3)  
5135 0.84541 (Left-Caudate)(lh.parstriangularis\_3)(lh.rostralanteriorcingulate\_1)(lh.rostralmiddlefrontal\_1)  
5136 0.84541 (Left-Caudate)(lh.parstriangularis\_3)(lh.rostralanteriorcingulate\_1)(lh.rostralmiddlefrontal\_4)  
5137 0.84541 (Left-Caudate)(lh.precentral\_11)(lh.precentral\_7)(lh.precentral\_9)  
5138 0.84541 (Left-Caudate)(lh.rostralmiddlefrontal\_1)(lh.rostralmiddlefrontal\_12)(lh.rostralmiddlefrontal\_9)  
5139 0.84541 (Left-Pallidum)(Left-Putamen)(Left-Thalamus-Proper)(lh.posteriorcingulate\_3)  
5140 0.84541 (Left-Pallidum)(Left-Putamen)(Left-Thalamus-Proper)(lh.precentral\_11)(lh.precentral\_4)  
5141 0.84541 (Left-Pallidum)(Left-Putamen)(Left-Thalamus-Proper)(lh.precentral\_7)  
5142 0.84541 (Left-Pallidum)(Left-Thalamus-Proper)(lh.precentral\_7)  
5143 0.84541 (Left-Putamen)(Left-Thalamus-Proper)(lh.postcentral\_8)(lh.precentral\_4)  
5144 0.84541 (Left-Putamen)(lh.caudalmiddlefrontal\_1)(lh.rostralmiddlefrontal\_1)  
5145 0.84541 (Left-Putamen)(lh.caudalmiddlefrontal\_3)(lh.rostralmiddlefrontal\_1)(lh.rostralmiddlefrontal\_9)  
5146 0.84541 (Left-Putamen)(lh.insula\_3)(lh.precentral\_9)  
5147 0.84541 (Left-Putamen)(lh.insula\_6)(lh.lateralorbitofrontal\_6)(lh.parstriangularis\_3)  
5148 0.84541 (Left-Putamen)(lh.insula\_6)(lh.parstriangularis\_3)(lh.rostralmiddlefrontal\_1)(lh.rostralmiddlefrontal\_9)  
5149 0.84541 (Left-Putamen)(lh.parstriangularis\_3)(lh.rostralanteriorcingulate\_1)(lh.rostralmiddlefrontal\_1)  
5150 0.84541 (Left-Putamen)(lh.parstriangularis\_3)(lh.rostralmiddlefrontal\_1)(lh.rostralmiddlefrontal\_12)

5151 0.84541 (Left-Putamen)(lh.precentral\_11)(lh.precentral\_13)  
5152 0.84541 (Left-Putamen)(lh.rostralmiddlefrontal\_12)(lh.superiorfrontal\_4)  
5153 0.84541 (Left-Putamen)(lh.rostralmiddlefrontal\_8)(lh.superiorfrontal\_3)  
5154 0.84541 (lh.bankssts\_2)(lh.inferiortemporal\_3)(lh.inferiortemporal\_6)  
5155 0.84541 (lh.bankssts\_3)(lh.inferiorparietal\_5)(lh.superiortemporal\_2)  
5156 0.84541 (lh.caudalanteriorcingulate\_1)(lh.caudalanteriorcingulate\_2)(lh.superiorfrontal\_10)  
5157 0.84541 (lh.caudalanteriorcingulate\_2)(lh.rostralanteriorcingulate\_1)(lh.rostralanteriorcingulate\_2)(lh.superiorfrontal\_4)  
5158 0.84541 (lh.caudalanteriorcingulate\_2)(lh.superiorfrontal\_14)(lh.superiorfrontal\_4)(lh.superiorfrontal\_8)  
5159 0.84541 (lh.caudalmiddlefrontal\_3)(lh.parsopercularis\_3)(lh.rostralmiddlefrontal\_1)  
5160 0.84541 (lh.fusiform\_1)(lh.lateraloccipital\_10)  
5161 0.84541 (lh.fusiform\_2)(lh.lateraloccipital\_6)(lh.lingual\_8)(lh.pericalcarine\_3)  
5162 0.84541 (lh.inferiorparietal\_1)(lh.lateraloccipital\_6)(lh.lateraloccipital\_7)(lh.pericalcarine\_3)  
5163 0.84541 (lh.insula\_1)(lh.postcentral\_8)(lh.supramarginal\_4)  
5164 0.84541 (lh.insula\_6)(lh.lateralorbitofrontal\_6)(lh.rostralmiddlefrontal\_1)  
5165 0.84541 (lh.lateraloccipital\_2)(lh.lateraloccipital\_3)(lh.lateraloccipital\_6)(lh.pericalcarine\_2)  
5166 0.84541 (lh.lateraloccipital\_7)(lh.lingual\_1)(lh.pericalcarine\_3)  
5167 0.84541 (lh.lateralorbitofrontal\_2)(lh.medialorbitofrontal\_4)  
5168 0.84541 (lh.lateralorbitofrontal\_4)(lh.rostralanteriorcingulate\_1)(lh.rostralmiddlefrontal\_12)(lh.rostralmiddlefrontal\_9)  
5169 0.84541 (lh.lateralorbitofrontal\_6)(lh.lateralorbitofrontal\_7)(lh.medialorbitofrontal\_2)  
5170 0.84541 (lh.medialorbitofrontal\_2)(lh.medialorbitofrontal\_4)(lh.rostralanteriorcingulate\_1)  
5171 0.84541 (lh.medialorbitofrontal\_2)(lh.rostralmiddlefrontal\_12)(lh.superiorfrontal\_4)  
5172 0.84541 (lh.parsorbitalis\_1)(lh.rostralmiddlefrontal\_9)  
5173 0.84541 (lh.precentral\_4)(lh.precentral\_5)  
5174 0.84541 (lh.precuneus\_10)(lh.precuneus\_11)(lh.precuneus\_9)(lh.superiorparietal\_11)  
5175 0.84541 (lh.precuneus\_10)(lh.precuneus\_8)(lh.precuneus\_9)(lh.superiorparietal\_11)  
5176 0.84541 (lh.rostralanteriorcingulate\_1)(lh.rostralmiddlefrontal\_8)(lh.rostralmiddlefrontal\_9)  
5177 0.84541 (lh.rostralanteriorcingulate\_2)(lh.superiorfrontal\_10)(lh.superiorfrontal\_11)(lh.superiorfrontal\_4)  
5178 0.84541 (lh.rostralmiddlefrontal\_1)(lh.rostralmiddlefrontal\_5)(lh.rostralmiddlefrontal\_9)  
5179 0.84541 (lh.rostralmiddlefrontal\_9)(lh.superiorfrontal\_2)(lh.superiorfrontal\_3)(lh.superiorfrontal\_4)  
5180 0.84541 (lh.superiorfrontal\_10)(lh.superiorfrontal\_14)(lh.superiorfrontal\_7)  
5181 0.84541 (lh.superiorfrontal\_11)(lh.superiorfrontal\_3)(lh.superiorfrontal\_4)  
5182 0.84541 (lh.superiorfrontal\_11)(lh.superiorfrontal\_3)  
5183 0.84541 (lh.superiorfrontal\_12)(lh.superiorfrontal\_13)  
5184 0.84541 (rh.bankssts\_2)(rh.inferiorparietal\_4)(rh.insula\_2)  
5185 0.84541 (rh.bankssts\_2)(rh.inferiortemporal\_2)  
5186 0.84541 (rh.caudalanteriorcingulate\_3)(rh.posteriorcingulate\_1)(rh.posteriorcingulate\_2)  
5187 0.84541 (rh.fusiform\_1)(rh.fusiform\_2)(rh.lateraloccipital\_8)(rh.lingual\_7)  
5188 0.84541 (rh.fusiform\_1)(rh.lateraloccipital\_4)(rh.lateraloccipital\_7)(rh.lateraloccipital\_8)(rh.lingual\_2)  
5189 0.84541 (rh.fusiform\_1)(rh.lingual\_4)(rh.pericalcarine\_1)  
5190 0.84541 (rh.fusiform\_2)(rh.inferiorparietal\_10)(rh.lateraloccipital\_10)(rh.lateraloccipital\_8)  
5191 0.84541 (rh.fusiform\_2)(rh.inferiorparietal\_10)(rh.lingual\_7)  
5192 0.84541 (rh.fusiform\_3)(rh.inferiorparietal\_10)(rh.lateraloccipital\_10)  
5193 0.84541 (rh.fusiform\_8)(rh.insula\_5)(rh.superiortemporal\_10)  
5194 0.84541 (rh.inferiorparietal\_12)(rh.lateraloccipital\_8)(rh.lingual\_7)  
5195 0.84541 (rh.inferiorparietal\_4)(rh.inferiorparietal\_9)  
5196 0.84541 (rh.inferiortemporal\_2)(rh.superiortemporal\_3)(rh.superiortemporal\_6)  
5197 0.84541 (rh.lateraloccipital\_1)(rh.lateraloccipital\_4)(rh.pericalcarine\_4)  
5198 0.84541 (rh.lateraloccipital\_3)(rh.pericalcarine\_3)(rh.superiorparietal\_11)  
5199 0.84541 (rh.lateraloccipital\_7)(rh.lingual\_1)(rh.lingual\_2)  
5200 0.84541 (rh.lateralorbitofrontal\_6)(rh.parstriangularis\_1)(rh.parstriangularis\_2)



5201 0.84541 (rh.lateralorbitofrontal\_6)(rh.parstriangularis\_3)(rh.rostralmiddlefrontal\_12)  
5202 0.84541 (rh.lateralorbitofrontal\_7)(rh.parstriangularis\_4)(rh.rostralmiddlefrontal\_12)  
5203 0.84541 (rh.lingual\_2)(rh.lingual\_5)  
5204 0.84541 (rh.middletemporal\_4)(rh.middletemporal\_8)  
5205 0.84541 (rh.paracentral\_4)(rh.precentral\_13)(rh.precentral\_14)(rh.precentral\_15)  
5206 0.84541 (rh.paracentral\_6)(rh.supramarginal\_8)  
5207 0.84541 (rh.parstriangularis\_1)(rh.parstriangularis\_2)(rh.rostralmiddlefrontal\_8)  
5208 0.84541 (rh.parstriangularis\_4)(rh.rostralmiddlefrontal\_12)(rh.rostralmiddlefrontal\_3)(rh.rostralmiddlefrontal\_8)  
5209 0.84541 (rh.parstriangularis\_4)(rh.rostralmiddlefrontal\_7)  
5210 0.84541 (rh.precentral\_10)(rh.precentral\_9)  
5211 0.84541 (rh.precuneus\_10)(rh.superiorparietal\_1)(rh.superiorparietal\_8)  
5212 0.84541 (rh.superiorfrontal\_11)(rh.superiorfrontal\_13)(rh.superiorfrontal\_7)(rh.superiorfrontal\_9)  
5213 0.84541 (rh.superiorfrontal\_12)(rh.superiorfrontal\_13)(rh.superiorfrontal\_16)  
5214 0.84541 (rh.superiorfrontal\_2)(rh.superiorfrontal\_4)(rh.superiorfrontal\_5)(rh.superiorfrontal\_6)(rh.superiorfrontal\_7)  
5215 0.84541 (rh.superiortemporal\_2)(rh.superiortemporal\_3)  
5216 0.84541 (Right-Caudate)(rh.caudalanteriorcingulate\_3)(rh.posteriorcingulate\_1)(rh.posteriorcingulate\_2)  
5217 0.84541 (Right-Caudate)(rh.lateralorbitofrontal\_7)(rh.parstriangularis\_1)  
5218 0.84541 (Right-Caudate)(Right-Putamen)(rh.caudalmiddlefrontal\_4)(rh.rostralmiddlefrontal\_1)  
5219 0.84541 (Right-Caudate)(Right-Putamen)(rh.precentral\_5)(rh.precentral\_6)  
5220 0.84541 (Right-Hippocampus)(rh.inferiorparietal\_4)(rh.superiortemporal\_1)  
5221 0.84541 (Right-Hippocampus)(rh.superiorparietal\_1)(rh.supramarginal\_9)  
5222 0.84541 (Right-Hippocampus)(Right-Thalamus-Proper)(rh.isthmuscingulate\_1)  
5223 0.84541 (Right-Pallidum)(rh.insula\_1)  
5224 0.84541 (Right-Pallidum)(Right-Putamen)(rh.insula\_1)  
5225 0.84541 (Right-Putamen)(rh.lateralorbitofrontal\_2)(rh.lateralorbitofrontal\_4)(rh.lateralorbitofrontal\_6)(rh.lateralorbitofrontal\_7)  
5226 0.84541 (Right-Putamen)(rh.lateralorbitofrontal\_6)(rh.parstriangularis\_1)(rh.rostralmiddlefrontal\_12)(rh.rostralmiddlefrontal\_8)  
5227 0.84541 (Right-Putamen)(rh.lateralorbitofrontal\_7)(rh.rostralmiddlefrontal\_8)(rh.superiorfrontal\_2)  
5228 0.84541 (Right-Putamen)(rh.paracentral\_6)  
5229 0.84541 (Right-Putamen)(rh.parsopercularis\_2)(rh.parstriangularis\_1)  
5230 0.84541 (Right-Putamen)(rh.parstriangularis\_1)(rh.rostralmiddlefrontal\_12)(rh.rostralmiddlefrontal\_3)(rh.rostralmiddlefrontal\_8)  
5231 0.84541 (Right-Putamen)(rh.postcentral\_5)(rh.supramarginal\_1)  
5232 0.84541 (Right-Putamen)(rh.precentral\_6)(rh.precentral\_8)  
5233 0.84541 (Right-Putamen)(rh.rostralmiddlefrontal\_12)(rh.rostralmiddlefrontal\_13)  
5234 0.84541 (Right-Putamen)(rh.rostralmiddlefrontal\_8)(rh.superiorfrontal\_7)  
5235 0.84541 (Right-Putamen)(rh.superiorfrontal\_9)  
5236 0.843 (Left-Amygdala)(Left-Pallidum)(Left-Putamen)(lh.insula\_7)  
5237 0.843 (Left-Amygdala)(Left-Pallidum)(lh.insula\_7)  
5238 0.843 (Left-Caudate)(Left-Pallidum)(Left-Putamen)(Left-Thalamus-Proper)(lh.precentral\_11)(lh.precentral\_4)  
5239 0.843 (Left-Caudate)(Left-Pallidum)(Left-Putamen)(Left-Thalamus-Proper)(lh.precentral\_9)  
5240 0.843 (Left-Caudate)(Left-Pallidum)(Left-Thalamus-Proper)(lh.precentral\_9)  
5241 0.843 (Left-Caudate)(Left-Putamen)(lh.lateralorbitofrontal\_4)(lh.rostralmiddlefrontal\_12)(lh.rostralmiddlefrontal\_9)  
5242 0.843 (Left-Caudate)(Left-Putamen)(lh.lateralorbitofrontal\_7)(lh.medialorbitofrontal\_2)(lh.medialorbitofrontal\_4)  
5243 0.843 (Left-Caudate)(Left-Putamen)(lh.medialorbitofrontal\_2)(lh.parstriangularis\_3)  
5244 0.843 (Left-Caudate)(Left-Putamen)(lh.rostralmiddlefrontal\_4)(lh.superiorfrontal\_10)  
5245 0.843 (Left-Caudate)(Left-Thalamus-Proper)(Right-Caudate)(Right-Thalamus-Proper)  
5246 0.843 (Left-Caudate)(lh.caudalanteriorcingulate\_2)(lh.superiorfrontal\_10)(lh.superiorfrontal\_11)(lh.superiorfrontal\_8)  
5247 0.843 (Left-Caudate)(lh.insula\_6)(lh.parsopercularis\_1)  
5248 0.843 (Left-Caudate)(lh.medialorbitofrontal\_2)(lh.medialorbitofrontal\_4)(lh.rostralanteriorcingulate\_1)  
5249 0.843 (Left-Caudate)(lh.medialorbitofrontal\_2)(lh.rostralanteriorcingulate\_1)(lh.superiorfrontal\_3)  
5250 0.843 (Left-Caudate)(lh.parsopercularis\_1)(lh.parstriangularis\_3)

5251 0.843 (Left-Caudate)(lh.postcentral\_8)(lh.precentral\_4)(lh.precentral\_7)  
5252 0.843 (Left-Caudate)(lh.posteriorcingulate\_3)(lh.posteriorcingulate\_4)  
5253 0.843 (Left-Caudate)(lh.rostralmiddlefrontal\_1)(lh.rostralmiddlefrontal\_3)  
5254 0.843 (Left-Hippocampus)(Left-Putamen)(lh.supramarginal\_1)  
5255 0.843 (Left-Hippocampus)(lh.fusiform\_5)(lh.inferiorparietal\_5)  
5256 0.843 (Left-Hippocampus)(lh.inferiorparietal\_5)(lh.insula\_2)  
5257 0.843 (Left-Putamen)(Left-Thalamus-Proper)(lh.superiorparietal\_3)  
5258 0.843 (Left-Putamen)(lh.lateralorbitofrontal\_4)(lh.rostralanteriorcingulate\_1)(lh.rostralmiddlefrontal\_12)(lh.rostralmiddlefrontal\_9)  
5259 0.843 (Left-Putamen)(lh.medialorbitofrontal\_2)(lh.parstriangularis\_3)(lh.rostralmiddlefrontal\_12)(lh.rostralmiddlefrontal\_9)  
5260 0.843 (Left-Putamen)(lh.medialorbitofrontal\_5)(lh.rostralanteriorcingulate\_1)  
5261 0.843 (Left-Putamen)(lh.parstriangularis\_3)(lh.rostralanteriorcingulate\_1)(lh.rostralmiddlefrontal\_1)(lh.rostralmiddlefrontal\_9)  
5262 0.843 (Left-Putamen)(lh.parstriangularis\_3)(lh.rostralanteriorcingulate\_1)(lh.rostralmiddlefrontal\_4)(lh.rostralmiddlefrontal\_9)  
5263 0.843 (Left-Putamen)(lh.parstriangularis\_3)(lh.rostralmiddlefrontal\_1)(lh.rostralmiddlefrontal\_12)(lh.rostralmiddlefrontal\_9)  
5264 0.843 (Left-Putamen)(lh.postcentral\_8)(lh.precentral\_11)(lh.precentral\_14)  
5265 0.843 (Left-Putamen)(lh.rostralanteriorcingulate\_2)(lh.rostralmiddlefrontal\_1)  
5266 0.843 (Left-Putamen)(lh.superiorparietal\_5)  
5267 0.843 (lh.bankssts\_2)(lh.fusiform\_7)(lh.inferiortemporal\_3)  
5268 0.843 (lh.caudalanteriorcingulate\_1)(lh.rostralanteriorcingulate\_2)(lh.rostralmiddlefrontal\_4)  
5269 0.843 (lh.caudalmiddlefrontal\_4)(lh.caudalmiddlefrontal\_6)(lh.superiorfrontal\_12)  
5270 0.843 (lh.entorhinal\_1)(lh.insula\_4)  
5271 0.843 (lh.fusiform\_1)(lh.lateraloccipital\_6)  
5272 0.843 (lh.fusiform\_2)(lh.lateraloccipital\_6)(lh.lingual\_4)(lh.pericalcarine\_3)  
5273 0.843 (lh.fusiform\_6)(lh.inferiortemporal\_7)  
5274 0.843 (lh.insula\_1)(lh.postcentral\_14)(lh.supramarginal\_1)(lh.supramarginal\_2)  
5275 0.843 (lh.insula\_3)(lh.precentral\_14)  
5276 0.843 (lh.isthmuscingulate\_2)(lh.precuneus\_11)(lh.precuneus\_6)  
5277 0.843 (lh.lateraloccipital\_1)(lh.lateraloccipital\_2)(lh.pericalcarine\_1)(lh.pericalcarine\_2)  
5278 0.843 (lh.lateraloccipital\_11)(lh.lingual\_1)(lh.pericalcarine\_2)(lh.pericalcarine\_3)  
5279 0.843 (lh.lateraloccipital\_2)(lh.lateraloccipital\_3)(lh.lateraloccipital\_6)(lh.pericalcarine\_3)  
5280 0.843 (lh.lateralorbitofrontal\_6)(lh.lateralorbitofrontal\_7)(lh.parstriangularis\_3)(lh.rostralmiddlefrontal\_12)(lh.rostralmiddlefrontal\_6)  
5281 0.843 (lh.lateralorbitofrontal\_6)(lh.medialorbitofrontal\_2)(lh.rostralmiddlefrontal\_12)  
5282 0.843 (lh.lateralorbitofrontal\_6)(lh.parstriangularis\_2)(lh.rostralmiddlefrontal\_1)  
5283 0.843 (lh.lateralorbitofrontal\_7)(lh.medialorbitofrontal\_4)(lh.rostralanteriorcingulate\_1)  
5284 0.843 (lh.lateralorbitofrontal\_7)(lh.parstriangularis\_3)(lh.rostralmiddlefrontal\_1)  
5285 0.843 (lh.lateralorbitofrontal\_7)(lh.rostralmiddlefrontal\_9)(lh.superiorfrontal\_3)  
5286 0.843 (lh.lingual\_8)(lh.precuneus\_11)  
5287 0.843 (lh.paracentral\_5)(lh.superiorfrontal\_12)(lh.superiorfrontal\_14)(lh.superiorfrontal\_15)  
5288 0.843 (lh.parsopercularis\_2)(lh.parsopercularis\_3)(lh.parstriangularis\_3)  
5289 0.843 (lh.parstriangularis\_2)(lh.rostralmiddlefrontal\_1)(lh.rostralmiddlefrontal\_9)  
5290 0.843 (lh.parstriangularis\_3)(lh.rostralanteriorcingulate\_2)(lh.rostralmiddlefrontal\_4)  
5291 0.843 (lh.parstriangularis\_3)(lh.rostralanteriorcingulate\_2)(lh.rostralmiddlefrontal\_9)  
5292 0.843 (lh.postcentral\_14)(lh.supramarginal\_1)(lh.supramarginal\_4)  
5293 0.843 (lh.postcentral\_3)(lh.postcentral\_6)  
5294 0.843 (lh.postcentral\_5)(lh.postcentral\_6)  
5295 0.843 (lh.precentral\_5)(lh.precentral\_6)  
5296 0.843 (lh.precuneus\_11)(lh.precuneus\_6)(lh.superiorparietal\_11)  
5297 0.843 (lh.precuneus\_6)(lh.precuneus\_8)(lh.superiorparietal\_9)  
5298 0.843 (lh.precuneus\_8)(lh.superiorparietal\_11)(lh.superiorparietal\_6)  
5299 0.843 (lh.rostralanteriorcingulate\_1)(lh.superiorfrontal\_1)  
5300 0.843 (lh.rostralanteriorcingulate\_1)(lh.superiorfrontal\_2)

5301 0.843 (lh.rostralmiddlefrontal\_11)(lh.rostralmiddlefrontal\_6)  
5302 0.843 (lh.rostralmiddlefrontal\_4)(lh.rostralmiddlefrontal\_8)(lh.superiorfrontal\_3)(lh.superiorfrontal\_4)  
5303 0.843 (lh.rostralmiddlefrontal\_4)(lh.rostralmiddlefrontal\_9)(lh.superiorfrontal\_3)(lh.superiorfrontal\_4)  
5304 0.843 (lh.rostralmiddlefrontal\_8)(lh.superiorfrontal\_1)(lh.superiorfrontal\_3)  
5305 0.843 (lh.superiorfrontal\_10)(lh.superiorfrontal\_14)(lh.superiorfrontal\_7)(lh.superiorfrontal\_8)  
5306 0.843 (lh.superiorfrontal\_10)(lh.superiorfrontal\_4)(lh.superiorfrontal\_7)(lh.superiorfrontal\_9)  
5307 0.843 (lh.superiorfrontal\_10)(lh.superiorfrontal\_4)(lh.superiorfrontal\_9)  
5308 0.843 (lh.superiorparietal\_5)(lh.supramarginal\_1)(lh.supramarginal\_6)  
5309 0.843 (lh.superiortemporal\_6)(lh.superiortemporal\_9)  
5310 0.843 (rh.caudalmiddlefrontal\_4)(rh.parsopercularis\_2)  
5311 0.843 (rh.caudalmiddlefrontal\_5)(rh.superiorfrontal\_11)  
5312 0.843 (rh.cuneus\_2)(rh.pericalcarine\_2)(rh.superiorparietal\_11)  
5313 0.843 (rh.fusiform\_1)(rh.fusiform\_2)(rh.inferiorparietal\_10)(rh.lateraloccipital\_10)  
5314 0.843 (rh.fusiform\_1)(rh.inferiorparietal\_10)(rh.lingual\_7)  
5315 0.843 (rh.fusiform\_2)(rh.fusiform\_3)(rh.lateraloccipital\_10)(rh.lateraloccipital\_8)  
5316 0.843 (rh.fusiform\_2)(rh.fusiform\_5)  
5317 0.843 (rh.inferiorparietal\_10)(rh.inferiorparietal\_6)  
5318 0.843 (rh.inferiorparietal\_10)(rh.lingual\_5)(rh.lingual\_7)  
5319 0.843 (rh.inferiortemporal\_5)(rh.middletemporal\_1)  
5320 0.843 (rh.insula\_3)(rh.precentral\_5)(rh.precentral\_7)  
5321 0.843 (rh.lateraloccipital\_1)(rh.lateraloccipital\_3)(rh.pericalcarine\_3)  
5322 0.843 (rh.lateraloccipital\_3)(rh.superiorparietal\_13)  
5323 0.843 (rh.lateralorbitofrontal\_6)(rh.lateralorbitofrontal\_7)(rh.parstriangularis\_4)  
5324 0.843 (rh.lateralorbitofrontal\_7)(rh.medialorbitofrontal\_2)(rh.rostralmiddlefrontal\_11)(rh.rostralmiddlefrontal\_12)  
5325 0.843 (rh.lingual\_2)(rh.pericalcarine\_1)(rh.pericalcarine\_3)  
5326 0.843 (rh.middletemporal\_5)(rh.middletemporal\_6)  
5327 0.843 (rh.middletemporal\_5)(rh.middletemporal\_8)  
5328 0.843 (rh.middletemporal\_8)(rh.middletemporal\_9)  
5329 0.843 (rh.paracentral\_3)(rh.precentral\_15)(rh.precentral\_16)  
5330 0.843 (rh.paracentral\_3)(rh.superiorfrontal\_17)  
5331 0.843 (rh.paracentral\_4)(rh.precentral\_16)  
5332 0.843 (rh.paracentral\_6)(rh.superiorparietal\_7)  
5333 0.843 (rh.pericalcarine\_2)(rh.superiorparietal\_11)(rh.superiorparietal\_13)  
5334 0.843 (rh.postcentral\_1)(rh.postcentral\_2)(rh.postcentral\_3)  
5335 0.843 (rh.posteriorcingulate\_4)(rh.supramarginal\_9)  
5336 0.843 (rh.precentral\_5)(rh.precentral\_6)(rh.precentral\_7)  
5337 0.843 (rh.precuneus\_1)(rh.superiorparietal\_13)  
5338 0.843 (rh.precuneus\_7)(rh.superiorparietal\_1)(rh.superiorparietal\_10)  
5339 0.843 (rh.rostralmiddlefrontal\_12)(rh.rostralmiddlefrontal\_3)(rh.rostralmiddlefrontal\_5)(rh.rostralmiddlefrontal\_8)  
5340 0.843 (rh.rostralmiddlefrontal\_9)(rh.superiorfrontal\_4)  
5341 0.843 (rh.rostralmiddlefrontal\_9)(rh.superiorfrontal\_6)  
5342 0.843 (rh.superiorfrontal\_10)(rh.superiorfrontal\_11)(rh.superiorfrontal\_13)(rh.superiorfrontal\_8)  
5343 0.843 (rh.superiorfrontal\_11)(rh.superiorfrontal\_13)(rh.superiorfrontal\_5)(rh.superiorfrontal\_9)  
5344 0.843 (rh.superiorfrontal\_12)(rh.superiorfrontal\_13)(rh.superiorfrontal\_15)  
5345 0.843 (rh.superiorfrontal\_2)(rh.superiorfrontal\_3)(rh.superiorfrontal\_4)(rh.superiorfrontal\_5)  
5346 0.843 (rh.superiorfrontal\_4)(rh.superiorfrontal\_8)  
5347 0.843 (Right-Accumbens-area)(Right-Amygdala)(Right-Caudate)(Right-Pallidum)(Right-Thalamus-Proper)  
5348 0.843 (Right-Accumbens-area)(Right-Amygdala)(Right-Caudate)(Right-Pallidum)  
5349 0.843 (Right-Accumbens-area)(Right-Amygdala)(Right-Caudate)(Right-Thalamus-Proper)  
5350 0.843 (Right-Accumbens-area)(Right-Amygdala)(Right-Caudate)

5351 0.843 (Right-Caudate)(rh.insula\_1)(rh.supramarginal\_8)  
5352 0.843 (Right-Caudate)(rh.insula\_7)(rh.parstriangularis\_1)  
5353 0.843 (Right-Caudate)(rh.lateralorbitofrontal\_4)(rh.lateralorbitofrontal\_5)(rh.lateralorbitofrontal\_7)  
5354 0.843 (Right-Caudate)(rh.lateralorbitofrontal\_6)(rh.rostralmiddlefrontal\_12)  
5355 0.843 (Right-Caudate)(rh.rostralmiddlefrontal\_1)(rh.superiorfrontal\_7)  
5356 0.843 (Right-Caudate)(rh.rostralmiddlefrontal\_3)(rh.rostralmiddlefrontal\_5)  
5357 0.843 (Right-Caudate)(Right-Putamen)(rh.lateralorbitofrontal\_6)(rh.rostralmiddlefrontal\_12)  
5358 0.843 (Right-Hippocampus)(rh.inferiorparietal\_1)  
5359 0.843 (Right-Hippocampus)(rh.inferiorparietal\_10)(rh.lingual\_5)  
5360 0.843 (Right-Hippocampus)(rh.inferiorparietal\_4)(rh.supramarginal\_8)  
5361 0.843 (Right-Hippocampus)(rh.superiortemporal\_7)  
5362 0.843 (Right-Putamen)(rh.caudalmiddlefrontal\_4)(rh.insula\_7)(rh.rostralmiddlefrontal\_3)  
5363 0.843 (Right-Putamen)(rh.insula\_1)(rh.supramarginal\_1)(rh.supramarginal\_8)  
5364 0.843 (Right-Putamen)(rh.insula\_3)(rh.precentral\_5)(rh.precentral\_7)  
5365 0.843 (Right-Putamen)(rh.insula\_7)(rh.parstriangularis\_1)(rh.rostralmiddlefrontal\_3)  
5366 0.843 (Right-Putamen)(rh.lateralorbitofrontal\_6)(rh.lateralorbitofrontal\_7)(rh.medialorbitofrontal\_2)(rh.rostralmiddlefrontal\_13)  
5367 0.843 (Right-Putamen)(rh.rostralanterioringulate\_2)(rh.rostralmiddlefrontal\_8)  
5368 0.843 (Right-Putamen)(rh.rostralmiddlefrontal\_1)(rh.rostralmiddlefrontal\_8)  
5369 0.843 (Right-Putamen)(rh.rostralmiddlefrontal\_10)(rh.rostralmiddlefrontal\_8)(rh.superiorfrontal\_2)  
5370 0.843 (Right-Putamen)(rh.rostralmiddlefrontal\_11)(rh.rostralmiddlefrontal\_12)  
5371 0.84058 (Left-Accumbens-area)(Left-Caudate)(Left-Hippocampus)(Left-Pallidum)(Left-Thalamus-Proper)  
5372 0.84058 (Left-Accumbens-area)(Left-Caudate)(Left-Hippocampus)(Left-Pallidum)  
5373 0.84058 (Left-Accumbens-area)(Left-Caudate)(Left-Hippocampus)(Left-Putamen)(Left-Thalamus-Proper)  
5374 0.84058 (Left-Accumbens-area)(Left-Caudate)(Left-Hippocampus)(Left-Putamen)  
5375 0.84058 (Left-Accumbens-area)(Left-Caudate)(Left-Thalamus-Proper)(Right-Caudate)  
5376 0.84058 (Left-Accumbens-area)(Left-Caudate)(lh.lateralorbitofrontal\_2)  
5377 0.84058 (Left-Caudate)(Left-Pallidum)(lh.precentral\_7)  
5378 0.84058 (Left-Caudate)(Left-Putamen)(lh.caudalanterioringulate\_1)(lh.rostralmiddlefrontal\_4)  
5379 0.84058 (Left-Caudate)(Left-Putamen)(lh.lateralorbitofrontal\_6)(lh.lateralorbitofrontal\_7)(lh.rostralmiddlefrontal\_12)  
5380 0.84058 (Left-Caudate)(Left-Putamen)(lh.postcentral\_8)(lh.precentral\_14)  
5381 0.84058 (Left-Caudate)(Left-Putamen)(lh.rostralanterioringulate\_2)(lh.rostralmiddlefrontal\_4)(lh.rostralmiddlefrontal\_9)  
5382 0.84058 (Left-Caudate)(Left-Thalamus-Proper)(lh.postcentral\_8)(lh.precentral\_7)  
5383 0.84058 (Left-Caudate)(lh.caudalanterioringulate\_2)(lh.posterioringulate\_1)(lh.superiorfrontal\_14)  
5384 0.84058 (Left-Caudate)(lh.caudalmiddlefrontal\_1)(lh.caudalmiddlefrontal\_3)(lh.rostralmiddlefrontal\_1)  
5385 0.84058 (Left-Caudate)(lh.caudalmiddlefrontal\_1)(lh.caudalmiddlefrontal\_3)(lh.superiorfrontal\_11)  
5386 0.84058 (Left-Caudate)(lh.lateralorbitofrontal\_7)(lh.parstriangularis\_3)(lh.rostralanterioringulate\_1)(lh.rostralmiddlefrontal\_9)  
5387 0.84058 (Left-Caudate)(lh.lateralorbitofrontal\_7)(lh.rostralanterioringulate\_1)(lh.rostralmiddlefrontal\_12)(lh.rostralmiddlefrontal\_9)  
5388 0.84058 (Left-Caudate)(lh.medialorbitofrontal\_2)(lh.parstriangularis\_3)(lh.rostralmiddlefrontal\_9)  
5389 0.84058 (Left-Caudate)(lh.rostralanterioringulate\_2)(lh.rostralmiddlefrontal\_9)(lh.superiorfrontal\_4)  
5390 0.84058 (Left-Putamen)(lh.caudalanterioringulate\_2)(lh.superiorfrontal\_11)(lh.superiorfrontal\_4)  
5391 0.84058 (Left-Putamen)(lh.caudalmiddlefrontal\_3)(lh.rostralmiddlefrontal\_3)  
5392 0.84058 (Left-Putamen)(lh.insula\_6)(lh.rostralmiddlefrontal\_4)(lh.rostralmiddlefrontal\_9)  
5393 0.84058 (Left-Putamen)(lh.lateralorbitofrontal\_2)(lh.lateralorbitofrontal\_3)  
5394 0.84058 (Left-Putamen)(lh.lateralorbitofrontal\_4)(lh.lateralorbitofrontal\_7)(lh.rostralanterioringulate\_1)  
5395 0.84058 (Left-Putamen)(lh.lateralorbitofrontal\_7)(lh.medialorbitofrontal\_2)(lh.parstriangularis\_3)(lh.rostralmiddlefrontal\_12)  
5396 0.84058 (Left-Putamen)(lh.medialorbitofrontal\_2)(lh.parstriangularis\_3)(lh.rostralanterioringulate\_1)  
5397 0.84058 (Left-Putamen)(lh.postcentral\_14)  
5398 0.84058 (Left-Putamen)(lh.precentral\_5)  
5399 0.84058 (Left-Putamen)(lh.rostralmiddlefrontal\_3)(lh.rostralmiddlefrontal\_4)  
5400 0.84058 (Left-Putamen)(lh.rostralmiddlefrontal\_4)(lh.superiorfrontal\_3)

5401 0.84058 (Left-Putamen)(lh.superiorfrontal\_10)(lh.superiorfrontal\_11)(lh.superiorfrontal\_4)  
5402 0.84058 (Left-Putamen)(lh.superiorfrontal\_11)(lh.superiorfrontal\_12)(lh.superiorfrontal\_14)  
5403 0.84058 (lh.caudalmiddlefrontal\_3)(lh.parsopercularis\_1)  
5404 0.84058 (lh.caudalmiddlefrontal\_3)(lh.rostralmiddlefrontal\_4)(lh.rostralmiddlefrontal\_9)  
5405 0.84058 (lh.fusiform\_1)(lh.fusiform\_2)(lh.fusiform\_5)(lh.lingual\_8)  
5406 0.84058 (lh.fusiform\_1)(lh.fusiform\_2)(lh.lateraloccipital\_6)  
5407 0.84058 (lh.fusiform\_1)(lh.fusiform\_2)(lh.lingual\_8)(lh.pericalcarine\_3)  
5408 0.84058 (lh.fusiform\_1)(lh.inferiortemporal\_8)(lh.lateraloccipital\_9)  
5409 0.84058 (lh.fusiform\_2)(lh.lingual\_1)(lh.lingual\_8)(lh.pericalcarine\_3)  
5410 0.84058 (lh.fusiform\_6)(lh.inferiortemporal\_8)  
5411 0.84058 (lh.insula\_6)(lh.rostralmiddlefrontal\_1)(lh.rostralmiddlefrontal\_4)(lh.rostralmiddlefrontal\_9)  
5412 0.84058 (lh.lateraloccipital\_3)(lh.lateraloccipital\_5)(lh.pericalcarine\_2)  
5413 0.84058 (lh.lateraloccipital\_3)(lh.lateraloccipital\_6)(lh.pericalcarine\_2)(lh.pericalcarine\_3)  
5414 0.84058 (lh.lateralorbitofrontal\_2)(lh.lateralorbitofrontal\_3)  
5415 0.84058 (lh.lateralorbitofrontal\_4)(lh.lateralorbitofrontal\_6)(lh.rostralmiddlefrontal\_6)  
5416 0.84058 (lh.lateralorbitofrontal\_4)(lh.lateralorbitofrontal\_7)(lh.rostralanteriorcingulate\_1)  
5417 0.84058 (lh.lateralorbitofrontal\_4)(lh.medialorbitofrontal\_2)  
5418 0.84058 (lh.lateralorbitofrontal\_6)(lh.lateralorbitofrontal\_7)(lh.parstriangularis\_3)(lh.rostralmiddlefrontal\_6)(lh.rostralmiddlefrontal\_9)  
5419 0.84058 (lh.lateralorbitofrontal\_6)(lh.parstriangularis\_2)(lh.parstriangularis\_3)(lh.rostralmiddlefrontal\_1)  
5420 0.84058 (lh.lateralorbitofrontal\_7)(lh.medialorbitofrontal\_3)(lh.medialorbitofrontal\_4)  
5421 0.84058 (lh.lateralorbitofrontal\_7)(lh.rostralmiddlefrontal\_12)(lh.rostralmiddlefrontal\_6)(lh.rostralmiddlefrontal\_9)  
5422 0.84058 (lh.medialorbitofrontal\_2)(lh.medialorbitofrontal\_3)  
5423 0.84058 (lh.paracentral\_1)(lh.paracentral\_4)(lh.superiorfrontal\_16)  
5424 0.84058 (lh.paracentral\_3)(lh.postcentral\_1)  
5425 0.84058 (lh.parstriangularis\_2)(lh.parstriangularis\_3)(lh.rostralmiddlefrontal\_1)(lh.rostralmiddlefrontal\_9)  
5426 0.84058 (lh.parstriangularis\_3)(lh.rostralmiddlefrontal\_8)(lh.rostralmiddlefrontal\_9)  
5427 0.84058 (lh.precentral\_4)(lh.precentral\_9)  
5428 0.84058 (lh.precentral\_8)(lh.precentral\_9)  
5429 0.84058 (lh.precuneus\_2)(lh.superiorparietal\_6)  
5430 0.84058 (lh.precuneus\_2)(lh.superiorparietal\_7)  
5431 0.84058 (lh.precuneus\_3)(lh.precuneus\_4)  
5432 0.84058 (lh.precuneus\_6)(lh.precuneus\_9)(lh.superiorparietal\_11)(lh.superiorparietal\_6)  
5433 0.84058 (lh.rostralanteriorcingulate\_1)(lh.rostralmiddlefrontal\_8)(lh.superiorfrontal\_3)  
5434 0.84058 (lh.rostralmiddlefrontal\_1)(lh.rostralmiddlefrontal\_8)(lh.rostralmiddlefrontal\_9)  
5435 0.84058 (lh.superiorfrontal\_10)(lh.superiorfrontal\_14)(lh.superiorfrontal\_4)(lh.superiorfrontal\_8)  
5436 0.84058 (lh.superiorfrontal\_10)(lh.superiorfrontal\_14)(lh.superiorfrontal\_4)  
5437 0.84058 (lh.superiorfrontal\_10)(lh.superiorfrontal\_14)(lh.superiorfrontal\_9)  
5438 0.84058 (lh.superiorfrontal\_11)(lh.superiorfrontal\_4)(lh.superiorfrontal\_6)(lh.superiorfrontal\_7)(lh.superiorfrontal\_8)  
5439 0.84058 (lh.superiorfrontal\_11)(lh.superiorfrontal\_6)(lh.superiorfrontal\_7)(lh.superiorfrontal\_8)  
5440 0.84058 (lh.superiorfrontal\_12)(lh.superiorfrontal\_13)(lh.superiorfrontal\_14)  
5441 0.84058 (lh.superiorfrontal\_13)(lh.superiorfrontal\_7)(lh.superiorfrontal\_9)  
5442 0.84058 (lh.superiorfrontal\_13)(lh.superiorfrontal\_7)  
5443 0.84058 (lh.superiortemporal\_11)(lh.superiortemporal\_8)  
5444 0.84058 (lh.supramarginal\_1)(lh.supramarginal\_2)(lh.supramarginal\_6)  
5445 0.84058 (rh.fusiform\_1)(rh.lateraloccipital\_4)(rh.lateraloccipital\_8)(rh.pericalcarine\_1)  
5446 0.84058 (rh.fusiform\_3)(rh.inferiortemporal\_7)(rh.middletemporal\_1)  
5447 0.84058 (rh.inferiorparietal\_12)(rh.inferiorparietal\_4)  
5448 0.84058 (rh.inferiortemporal\_2)(rh.superiortemporal\_10)  
5449 0.84058 (rh.inferiortemporal\_5)(rh.middletemporal\_4)(rh.middletemporal\_6)  
5450 0.84058 (rh.insula\_3)(rh.precentral\_1)

5451 0.84058 (rh.lateralorbitofrontal\_5)(rh.lateralorbitofrontal\_6)  
5452 0.84058 (rh.medialorbitofrontal\_2)(rh.rostralmiddlefrontal\_11)(rh.superiorfrontal\_1)(rh.superiorfrontal\_2)  
5453 0.84058 (rh.middletemporal\_4)(rh.middletemporal\_5)(rh.middletemporal\_7)  
5454 0.84058 (rh.parsopercularis\_2)(rh.parstriangularis\_1)(rh.parstriangularis\_2)  
5455 0.84058 (rh.parsorbitalis\_1)(rh.parsorbitalis\_2)  
5456 0.84058 (rh.precuneus\_10)(rh.precuneus\_7)(rh.superiorparietal\_7)(rh.superiorparietal\_8)  
5457 0.84058 (rh.precuneus\_2)(rh.superiorparietal\_10)  
5458 0.84058 (rh.precuneus\_4)(rh.superiorparietal\_10)(rh.superiorparietal\_8)  
5459 0.84058 (rh.precuneus\_7)(rh.superiorparietal\_11)  
5460 0.84058 (rh.rostralmiddlefrontal\_10)(rh.rostralmiddlefrontal\_12)  
5461 0.84058 (rh.superiorfrontal\_1)(rh.superiorfrontal\_3)(rh.superiorfrontal\_4)  
5462 0.84058 (rh.superiortemporal\_1)(rh.superiortemporal\_3)(rh.superiortemporal\_9)  
5463 0.84058 (rh.supramarginal\_1)(rh.supramarginal\_6)(rh.supramarginal\_9)  
5464 0.84058 (Right-Caudate)(rh.parstriangularis\_1)(rh.rostralmiddlefrontal\_12)  
5465 0.84058 (Right-Caudate)(rh.precentral\_10)(rh.precentral\_13)  
5466 0.84058 (Right-Caudate)(Right-Pallidum)(rh.insula\_1)  
5467 0.84058 (Right-Caudate)(Right-Pallidum)(Right-Putamen)(rh.insula\_1)  
5468 0.84058 (Right-Caudate)(Right-Putamen)(rh.insula\_7)(rh.parstriangularis\_1)  
5469 0.84058 (Right-Caudate)(Right-Putamen)(rh.lateralorbitofrontal\_7)(rh.parstriangularis\_1)  
5470 0.84058 (Right-Caudate)(Right-Putamen)(rh.supramarginal\_8)  
5471 0.84058 (Right-Hippocampus)(rh.fusiform\_7)(rh.parahippocampal\_2)  
5472 0.84058 (Right-Hippocampus)(rh.insula\_5)(rh.middletemporal\_9)  
5473 0.84058 (Right-Hippocampus)(rh.isthmuscingulate\_2)(rh.precuneus\_2)(rh.precuneus\_4)  
5474 0.84058 (Right-Pallidum)(rh.precentral\_13)(rh.precentral\_7)  
5475 0.84058 (Right-Pallidum)(Right-Putamen)(rh.precentral\_13)(rh.precentral\_7)  
5476 0.84058 (Right-Putamen)(rh.medialorbitofrontal\_2)(rh.rostralmiddlefrontal\_11)(rh.superiorfrontal\_2)  
5477 0.84058 (Right-Putamen)(rh.precentral\_13)(rh.precentral\_6)  
5478 0.84058 (Right-Putamen)(rh.superiorfrontal\_11)(rh.superiorfrontal\_13)  
5479 0.84058 (Right-Putamen)(rh.transversetemporal\_1)  
5480 0.83816 (Left-Accumbens-area)(Right-Accumbens-area)  
5481 0.83816 (Left-Amygdala)(lh.insula\_4)(lh.superiortemporal\_11)  
5482 0.83816 (Left-Caudate)(Left-Pallidum)(Left-Putamen)(Left-Thalamus-Proper)(lh.precentral\_7)  
5483 0.83816 (Left-Caudate)(Left-Pallidum)(Left-Putamen)(lh.precentral\_11)(lh.precentral\_9)  
5484 0.83816 (Left-Caudate)(Left-Pallidum)(Left-Putamen)(lh.precentral\_7)  
5485 0.83816 (Left-Caudate)(Left-Pallidum)(Left-Thalamus-Proper)(lh.precentral\_7)  
5486 0.83816 (Left-Caudate)(Left-Pallidum)(lh.precentral\_11)(lh.precentral\_9)  
5487 0.83816 (Left-Caudate)(Left-Putamen)(lh.caudalanteriorcingulate\_2)(lh.rostralanteriorcingulate\_2)(lh.superiorfrontal\_4)  
5488 0.83816 (Left-Caudate)(Left-Putamen)(lh.caudalmiddlefrontal\_4)(lh.caudalmiddlefrontal\_6)(lh.precentral\_9)  
5489 0.83816 (Left-Caudate)(Left-Putamen)(lh.caudalmiddlefrontal\_5)(lh.precentral\_9)  
5490 0.83816 (Left-Caudate)(Left-Putamen)(lh.lateralorbitofrontal\_4)(lh.lateralorbitofrontal\_6)(lh.rostralmiddlefrontal\_9)  
5491 0.83816 (Left-Caudate)(Left-Putamen)(lh.lateralorbitofrontal\_6)(lh.lateralorbitofrontal\_7)(lh.parstriangularis\_3)  
5492 0.83816 (Left-Caudate)(Left-Putamen)(lh.lateralorbitofrontal\_6)(lh.lateralorbitofrontal\_7)(lh.rostralmiddlefrontal\_9)  
5493 0.83816 (Left-Caudate)(Left-Putamen)(lh.medialorbitofrontal\_5)(lh.rostralanteriorcingulate\_1)  
5494 0.83816 (Left-Caudate)(Left-Putamen)(lh.parsopercularis\_3)(lh.parstriangularis\_3)(lh.rostralmiddlefrontal\_1)  
5495 0.83816 (Left-Caudate)(Left-Putamen)(lh.precentral\_4)(lh.superiorfrontal\_14)  
5496 0.83816 (Left-Caudate)(Left-Putamen)(lh.rostralanteriorcingulate\_1)(lh.rostralmiddlefrontal\_4)(lh.superiorfrontal\_4)  
5497 0.83816 (Left-Caudate)(Left-Putamen)(lh.rostralmiddlefrontal\_8)(lh.superiorfrontal\_4)  
5498 0.83816 (Left-Caudate)(lh.caudalmiddlefrontal\_1)(lh.caudalmiddlefrontal\_3)(lh.caudalmiddlefrontal\_4)(lh.caudalmiddlefrontal\_5)  
5499 0.83816 (Left-Caudate)(lh.caudalmiddlefrontal\_3)(lh.insula\_6)(lh.parstriangularis\_3)  
5500 0.83816 (Left-Caudate)(lh.lateralorbitofrontal\_6)(lh.parstriangularis\_3)(lh.rostralmiddlefrontal\_1)(lh.rostralmiddlefrontal\_9)

5501 0.83816 (Left-Caudate)(lh.medialorbitofrontal\_2)(lh.rostralanteriorcingulate\_1)(lh.rostralmiddlefrontal\_9)(lh.superiorfrontal\_4)  
5502 0.83816 (Left-Caudate)(lh.parstriangularis\_3)(lh.rostralanteriorcingulate\_1)(lh.rostralmiddlefrontal\_1)(lh.rostralmiddlefrontal\_9)  
5503 0.83816 (Left-Caudate)(lh.postcentral\_8)(lh.precentral\_9)  
5504 0.83816 (Left-Caudate)(lh.rostralanteriorcingulate\_1)(lh.superiorfrontal\_3)(lh.superiorfrontal\_4)  
5505 0.83816 (Left-Caudate)(lh.superiorfrontal\_10)(lh.superiorfrontal\_11)(lh.superiorfrontal\_14)  
5506 0.83816 (Left-Pallidum)(Left-Putamen)(lh.precentral\_14)  
5507 0.83816 (Left-Pallidum)(lh.precentral\_14)  
5508 0.83816 (Left-Putamen)(lh.caudalmiddlefrontal\_1)(lh.superiorfrontal\_11)  
5509 0.83816 (Left-Putamen)(lh.caudalmiddlefrontal\_4)(lh.insula\_3)  
5510 0.83816 (Left-Putamen)(lh.insula\_6)(lh.parstriangularis\_3)(lh.rostralmiddlefrontal\_1)(lh.rostralmiddlefrontal\_4)  
5511 0.83816 (Left-Putamen)(lh.lateralorbitofrontal\_2)(lh.lateralorbitofrontal\_7)(lh.medialorbitofrontal\_5)  
5512 0.83816 (Left-Putamen)(lh.lateralorbitofrontal\_7)(lh.parstriangularis\_3)(lh.rostralanteriorcingulate\_1)(lh.rostralmiddlefrontal\_12)(lh.rostralmiddlefrontal\_9)  
5513 0.83816 (Left-Putamen)(lh.rostralmiddlefrontal\_4)(lh.rostralmiddlefrontal\_8)(lh.superiorfrontal\_4)  
5514 0.83816 (Left-Putamen)(lh.rostralmiddlefrontal\_9)(lh.superiorfrontal\_3)(lh.superiorfrontal\_4)  
5515 0.83816 (Left-Putamen)(lh.supramarginal\_4)  
5516 0.83816 (Left-Thalamus-Proper)(lh.insula\_1)(lh.superiorparietal\_3)  
5517 0.83816 (Left-Thalamus-Proper)(lh.postcentral\_8)(lh.precentral\_11)  
5518 0.83816 (lh.caudalanteriorcingulate\_2)(lh.superiorfrontal\_10)(lh.superiorfrontal\_14)  
5519 0.83816 (lh.caudalmiddlefrontal\_4)(lh.insula\_3)  
5520 0.83816 (lh.cuneus\_2)(lh.cuneus\_3)  
5521 0.83816 (lh.fusiform\_1)(lh.fusiform\_2)(lh.lateraloccipital\_10)  
5522 0.83816 (lh.fusiform\_1)(lh.fusiform\_2)(lh.lateraloccipital\_7)  
5523 0.83816 (lh.fusiform\_2)(lh.fusiform\_5)(lh.lateraloccipital\_9)  
5524 0.83816 (lh.fusiform\_2)(lh.pericalcarine\_2)(lh.pericalcarine\_3)  
5525 0.83816 (lh.inferiorparietal\_4)(lh.lateraloccipital\_6)  
5526 0.83816 (lh.inferiorparietal\_8)(lh.precuneus\_9)(lh.superiorparietal\_11)  
5527 0.83816 (lh.insula\_1)(lh.postcentral\_14)(lh.supramarginal\_4)  
5528 0.83816 (lh.isthmuscingulate\_2)(lh.precuneus\_6)(lh.superiorparietal\_5)  
5529 0.83816 (lh.lateraloccipital\_3)(lh.pericalcarine\_1)(lh.pericalcarine\_3)  
5530 0.83816 (lh.lateralorbitofrontal\_4)(lh.parstriangularis\_1)(lh.parstriangularis\_3)  
5531 0.83816 (lh.lateralorbitofrontal\_6)(lh.parsorbitalis\_1)(lh.rostralmiddlefrontal\_9)  
5532 0.83816 (lh.lateralorbitofrontal\_7)(lh.medialorbitofrontal\_2)(lh.parstriangularis\_3)(lh.rostralmiddlefrontal\_12)(lh.rostralmiddlefrontal\_9)  
5533 0.83816 (lh.medialorbitofrontal\_2)(lh.parstriangularis\_3)(lh.rostralanteriorcingulate\_1)(lh.rostralmiddlefrontal\_12)  
5534 0.83816 (lh.medialorbitofrontal\_2)(lh.rostralanteriorcingulate\_1)(lh.rostralmiddlefrontal\_9)(lh.superiorfrontal\_3)(lh.superiorfrontal\_4)  
5535 0.83816 (lh.medialorbitofrontal\_2)(lh.rostralmiddlefrontal\_12)(lh.superiorfrontal\_3)(lh.superiorfrontal\_4)  
5536 0.83816 (lh.paracentral\_1)(lh.paracentral\_3)  
5537 0.83816 (lh.postcentral\_3)(lh.postcentral\_8)  
5538 0.83816 (lh.precentral\_11)(lh.precentral\_12)(lh.precentral\_14)  
5539 0.83816 (lh.precentral\_4)(lh.superiorfrontal\_14)(lh.superiorfrontal\_15)  
5540 0.83816 (lh.precentral\_7)(lh.superiorparietal\_3)  
5541 0.83816 (lh.precentral\_7)(lh.supramarginal\_4)  
5542 0.83816 (lh.rostralanteriorcingulate\_1)(lh.rostralanteriorcingulate\_2)(lh.rostralmiddlefrontal\_8)  
5543 0.83816 (lh.rostralanteriorcingulate\_1)(lh.rostralmiddlefrontal\_4)(lh.superiorfrontal\_3)  
5544 0.83816 (lh.rostralanteriorcingulate\_2)(lh.rostralmiddlefrontal\_4)(lh.superiorfrontal\_11)  
5545 0.83816 (lh.rostralmiddlefrontal\_1)(lh.rostralmiddlefrontal\_12)(lh.rostralmiddlefrontal\_6)  
5546 0.83816 (lh.rostralmiddlefrontal\_1)(lh.superiorfrontal\_10)  
5547 0.83816 (lh.superiorfrontal\_11)(lh.superiorfrontal\_13)(lh.superiorfrontal\_14)(lh.superiorfrontal\_8)(lh.superiorfrontal\_9)  
5548 0.83816 (rh.bankssts\_1)(rh.inferiortemporal\_2)  
5549 0.83816 (rh.caudalmiddlefrontal\_4)(rh.precentral\_10)  
5550 0.83816 (rh.caudalmiddlefrontal\_4)(rh.precentral\_5)

5551 0.83816 (rh.caudalmiddlefrontal\_5)(rh.rostralmiddlefrontal\_5)  
5552 0.83816 (rh.fusiform\_1)(rh.inferiorparietal\_10)(rh.lingual\_5)  
5553 0.83816 (rh.fusiform\_1)(rh.lingual\_2)(rh.lingual\_5)  
5554 0.83816 (rh.fusiform\_5)(rh.fusiform\_6)  
5555 0.83816 (rh.inferiorparietal\_10)(rh.inferiorparietal\_12)(rh.lingual\_7)  
5556 0.83816 (rh.inferiorparietal\_10)(rh.inferiortemporal\_7)  
5557 0.83816 (rh.inferiorparietal\_10)(rh.lateraloccipital\_10)(rh.lingual\_7)  
5558 0.83816 (rh.inferiorparietal\_12)(rh.lateraloccipital\_8)(rh.superiorparietal\_11)  
5559 0.83816 (rh.inferiorparietal\_12)(rh.pericalcarine\_1)(rh.superiorparietal\_11)  
5560 0.83816 (rh.inferiorparietal\_4)(rh.inferiorparietal\_6)(rh.inferiorparietal\_8)  
5561 0.83816 (rh.inferiorparietal\_6)(rh.superiorparietal\_11)  
5562 0.83816 (rh.inferiortemporal\_2)(rh.middletemporal\_4)(rh.middletemporal\_5)  
5563 0.83816 (rh.isthmuscingulate\_2)(rh.precuneus\_2)(rh.precuneus\_4)(rh.precuneus\_7)  
5564 0.83816 (rh.lateraloccipital\_2)(rh.lateraloccipital\_3)  
5565 0.83816 (rh.lateralorbitofrontal\_2)(rh.parstriangularis\_4)  
5566 0.83816 (rh.lateralorbitofrontal\_6)(rh.parstriangularis\_4)(rh.rostralmiddlefrontal\_8)  
5567 0.83816 (rh.lateralorbitofrontal\_7)(rh.medialorbitofrontal\_2)(rh.rostralmiddlefrontal\_12)(rh.rostralmiddlefrontal\_13)  
5568 0.83816 (rh.medialorbitofrontal\_1)(rh.superiorfrontal\_1)  
5569 0.83816 (rh.medialorbitofrontal\_2)(rh.rostralmiddlefrontal\_8)  
5570 0.83816 (rh.paracentral\_4)(rh.superiorfrontal\_11)(rh.superiorfrontal\_16)  
5571 0.83816 (rh.parsopercularis\_4)(rh.rostralmiddlefrontal\_3)(rh.rostralmiddlefrontal\_5)  
5572 0.83816 (rh.parsorbitalis\_1)(rh.rostralmiddlefrontal\_12)  
5573 0.83816 (rh.parstriangularis\_1)(rh.rostralmiddlefrontal\_6)(rh.rostralmiddlefrontal\_8)  
5574 0.83816 (rh.postcentral\_1)(rh.supramarginal\_6)  
5575 0.83816 (rh.postcentral\_2)(rh.precentral\_3)  
5576 0.83816 (rh.postcentral\_3)(rh.supramarginal\_7)  
5577 0.83816 (rh.rostralmiddlefrontal\_10)(rh.rostralmiddlefrontal\_9)(rh.superiorfrontal\_2)  
5578 0.83816 (rh.superiorfrontal\_2)(rh.superiorfrontal\_3)(rh.superiorfrontal\_6)  
5579 0.83816 (rh.superiorfrontal\_2)(rh.superiorfrontal\_8)(rh.superiorfrontal\_9)  
5580 0.83816 (rh.superiorfrontal\_4)(rh.superiorfrontal\_5)(rh.superiorfrontal\_8)  
5581 0.83816 (rh.superiortemporal\_10)(rh.superiortemporal\_3)  
5582 0.83816 (rh.superiortemporal\_10)(rh.superiortemporal\_6)(rh.superiortemporal\_7)  
5583 0.83816 (Right-Caudate)(rh.caudalmiddlefrontal\_2)(rh.caudalmiddlefrontal\_4)  
5584 0.83816 (Right-Caudate)(rh.caudalmiddlefrontal\_5)(rh.rostralmiddlefrontal\_1)  
5585 0.83816 (Right-Caudate)(rh.insula\_1)(rh.precentral\_11)(rh.precentral\_7)  
5586 0.83816 (Right-Caudate)(rh.superiorfrontal\_5)(rh.superiorfrontal\_9)  
5587 0.83816 (Right-Caudate)(Right-Hippocampus)(rh.isthmuscingulate\_1)  
5588 0.83816 (Right-Caudate)(Right-Putamen)(rh.lateralorbitofrontal\_7)(rh.superiorfrontal\_2)  
5589 0.83816 (Right-Hippocampus)(rh.inferiortemporal\_2)(rh.superiortemporal\_3)  
5590 0.83816 (Right-Hippocampus)(rh.inferiortemporal\_2)(rh.superiortemporal\_6)  
5591 0.83816 (Right-Hippocampus)(Right-Putamen)(rh.superiorparietal\_1)  
5592 0.83816 (Right-Pallidum)(rh.precentral\_6)  
5593 0.83816 (Right-Pallidum)(Right-Putamen)(rh.precentral\_6)  
5594 0.83816 (Right-Pallidum)(Right-Putamen)(Right-Thalamus-Proper)(rh.insula\_1)  
5595 0.83816 (Right-Pallidum)(Right-Thalamus-Proper)(rh.insula\_1)  
5596 0.83816 (Right-Putamen)(rh.caudalmiddlefrontal\_4)(rh.caudalmiddlefrontal\_5)(rh.rostralmiddlefrontal\_1)  
5597 0.83816 (Right-Putamen)(rh.caudalmiddlefrontal\_4)(rh.precentral\_5)  
5598 0.83816 (Right-Putamen)(rh.lateralorbitofrontal\_7)(rh.rostralmiddlefrontal\_12)(rh.rostralmiddlefrontal\_13)  
5599 0.83816 (Right-Putamen)(rh.parsopercularis\_4)(rh.parstriangularis\_1)(rh.rostralmiddlefrontal\_3)  
5600 0.83816 (Right-Putamen)(rh.precentral\_11)(rh.superiorparietal\_1)



5601 0.83816 (Right-Putamen)(rh.precentral\_12)(rh.precentral\_13)  
5602 0.83816 (Right-Thalamus-Proper)(rh.isthmuscingulate\_1)(rh.isthmuscingulate\_2)  
5603 0.83575 (Left-Accumbens-area)(Left-Caudate)(Left-Hippocampus)(Left-Pallidum)(Left-Putamen)(Left-Thalamus-Proper)  
5604 0.83575 (Left-Accumbens-area)(Left-Caudate)(Left-Hippocampus)(Left-Pallidum)(Left-Putamen)  
5605 0.83575 (Left-Accumbens-area)(Left-Caudate)(Left-Putamen)(lh.lateralorbitofrontal\_2)  
5606 0.83575 (Left-Amygdala)(Left-Hippocampus)(lh.inferiortemporal\_1)(lh.insula\_4)  
5607 0.83575 (Left-Caudate)(Left-Putamen)(Left-Thalamus-Proper)(lh.caudalmiddlefrontal\_3)  
5608 0.83575 (Left-Caudate)(Left-Putamen)(Left-Thalamus-Proper)(lh.postcentral\_8)(lh.precentral\_7)  
5609 0.83575 (Left-Caudate)(Left-Putamen)(lh.caudalmiddlefrontal\_1)(lh.caudalmiddlefrontal\_3)(lh.rostralmiddlefrontal\_4)  
5610 0.83575 (Left-Caudate)(Left-Putamen)(lh.lateralorbitofrontal\_4)(lh.lateralorbitofrontal\_7)(lh.parstriangularis\_3)  
5611 0.83575 (Left-Caudate)(Left-Putamen)(lh.lateralorbitofrontal\_7)(lh.rostralanteriorcingulate\_1)(lh.rostralmiddlefrontal\_12)(lh.rostralmiddlefrontal\_9)  
5612 0.83575 (Left-Caudate)(Left-Putamen)(lh.medialorbitofrontal\_2)(lh.superiorfrontal\_3)  
5613 0.83575 (Left-Caudate)(Left-Putamen)(lh.rostralanteriorcingulate\_1)(lh.superiorfrontal\_3)  
5614 0.83575 (Left-Caudate)(Left-Putamen)(lh.rostralanteriorcingulate\_2)(lh.rostralmiddlefrontal\_1)  
5615 0.83575 (Left-Caudate)(Left-Putamen)(lh.rostralmiddlefrontal\_1)(lh.rostralmiddlefrontal\_12)  
5616 0.83575 (Left-Caudate)(Left-Thalamus-Proper)(lh.caudalmiddlefrontal\_3)  
5617 0.83575 (Left-Caudate)(Left-Thalamus-Proper)(lh.postcentral\_8)(lh.precentral\_4)  
5618 0.83575 (Left-Caudate)(lh.caudalanteriorcingulate\_2)(lh.rostralanteriorcingulate\_1)(lh.superiorfrontal\_4)  
5619 0.83575 (Left-Caudate)(lh.caudalanteriorcingulate\_2)(lh.rostralanteriorcingulate\_2)(lh.superiorfrontal\_10)  
5620 0.83575 (Left-Caudate)(lh.caudalanteriorcingulate\_2)(lh.superiorfrontal\_11)(lh.superiorfrontal\_4)(lh.superiorfrontal\_8)  
5621 0.83575 (Left-Caudate)(lh.insula\_1)(lh.postcentral\_8)(lh.precentral\_11)  
5622 0.83575 (Left-Caudate)(lh.lateralorbitofrontal\_4)(lh.lateralorbitofrontal\_7)(lh.rostralmiddlefrontal\_9)  
5623 0.83575 (Left-Caudate)(lh.lateralorbitofrontal\_6)(lh.parstriangularis\_3)(lh.rostralmiddlefrontal\_12)(lh.rostralmiddlefrontal\_9)  
5624 0.83575 (Left-Caudate)(lh.lateralorbitofrontal\_7)(lh.medialorbitofrontal\_2)(lh.parstriangularis\_3)  
5625 0.83575 (Left-Caudate)(lh.lateralorbitofrontal\_7)(lh.medialorbitofrontal\_4)(lh.medialorbitofrontal\_5)  
5626 0.83575 (Left-Caudate)(lh.parsopercularis\_1)(lh.rostralmiddlefrontal\_1)  
5627 0.83575 (Left-Caudate)(lh.postcentral\_8)(lh.precentral\_11)(lh.precentral\_4)  
5628 0.83575 (Left-Caudate)(lh.rostralanteriorcingulate\_1)(lh.rostralmiddlefrontal\_9)(lh.superiorfrontal\_3)  
5629 0.83575 (Left-Caudate)(lh.rostralanteriorcingulate\_2)(lh.superiorfrontal\_10)(lh.superiorfrontal\_11)  
5630 0.83575 (Left-Caudate)(lh.rostralmiddlefrontal\_12)(lh.superiorfrontal\_4)  
5631 0.83575 (Left-Hippocampus)(Left-Putamen)(lh.transversetemporal\_2)  
5632 0.83575 (Left-Hippocampus)(lh.fusiform\_5)(lh.lingual\_6)(lh.lingual\_8)  
5633 0.83575 (Left-Pallidum)(Left-Putamen)(Left-Thalamus-Proper)(lh.postcentral\_8)  
5634 0.83575 (Left-Pallidum)(Left-Thalamus-Proper)(lh.postcentral\_8)  
5635 0.83575 (Left-Putamen)(Left-Thalamus-Proper)(lh.caudalmiddlefrontal\_3)  
5636 0.83575 (Left-Putamen)(Left-Thalamus-Proper)(lh.paracentral\_5)  
5637 0.83575 (Left-Putamen)(Left-Thalamus-Proper)(lh.postcentral\_8)(lh.precentral\_11)  
5638 0.83575 (Left-Putamen)(lh.caudalanteriorcingulate\_2)(lh.superiorfrontal\_10)  
5639 0.83575 (Left-Putamen)(lh.caudalmiddlefrontal\_4)(lh.caudalmiddlefrontal\_6)(lh.precentral\_11)(lh.precentral\_9)  
5640 0.83575 (Left-Putamen)(lh.caudalmiddlefrontal\_5)(lh.caudalmiddlefrontal\_6)(lh.precentral\_9)  
5641 0.83575 (Left-Putamen)(lh.insula\_3)(lh.precentral\_14)  
5642 0.83575 (Left-Putamen)(lh.lateralorbitofrontal\_4)(lh.lateralorbitofrontal\_6)(lh.lateralorbitofrontal\_7)(lh.parstriangularis\_3)(lh.rostralmiddlefrontal\_12)(lh.rostralmiddlefrontal\_9)  
5643 0.83575 (Left-Putamen)(lh.lateralorbitofrontal\_4)(lh.parstriangularis\_3)(lh.rostralanteriorcingulate\_1)(lh.rostralmiddlefrontal\_9)  
5644 0.83575 (Left-Putamen)(lh.lateralorbitofrontal\_6)(lh.medialorbitofrontal\_2)  
5645 0.83575 (Left-Putamen)(lh.lateralorbitofrontal\_7)(lh.medialorbitofrontal\_2)(lh.parstriangularis\_3)(lh.rostralmiddlefrontal\_9)  
5646 0.83575 (Left-Putamen)(lh.rostralanteriorcingulate\_1)(lh.rostralmiddlefrontal\_12)(lh.superiorfrontal\_4)  
5647 0.83575 (Left-Putamen)(lh.rostralmiddlefrontal\_1)(lh.rostralmiddlefrontal\_3)  
5648 0.83575 (Left-Putamen)(lh.rostralmiddlefrontal\_4)(lh.rostralmiddlefrontal\_8)(lh.rostralmiddlefrontal\_9)  
5649 0.83575 (Left-Thalamus-Proper)(lh.caudalmiddlefrontal\_3)  
5650 0.83575 (Left-Thalamus-Proper)(lh.precentral\_14)

5651 0.83575 (lh.bankssts\_2)(lh.fusiform\_6)  
5652 0.83575 (lh.bankssts\_3)(lh.lateraloccipital\_9)  
5653 0.83575 (lh.caudalmiddlefrontal\_1)(lh.caudalmiddlefrontal\_6)  
5654 0.83575 (lh.cuneus\_2)(lh.pericalcarine\_1)(lh.pericalcarine\_2)  
5655 0.83575 (lh.fusiform\_2)(lh.lateraloccipital\_6)(lh.lateraloccipital\_7)(lh.lingual\_1)  
5656 0.83575 (lh.fusiform\_2)(lh.lateraloccipital\_7)(lh.lateraloccipital\_9)(lh.lingual\_8)  
5657 0.83575 (lh.fusiform\_2)(lh.lingual\_1)(lh.lingual\_4)(lh.lingual\_8)  
5658 0.83575 (lh.inferiorparietal\_10)(lh.inferiorparietal\_6)(lh.inferiorparietal\_9)  
5659 0.83575 (lh.inferiorparietal\_3)(lh.inferiorparietal\_8)  
5660 0.83575 (lh.inferiorparietal\_9)(lh.superiorparietal\_6)  
5661 0.83575 (lh.lateraloccipital\_3)(lh.lateraloccipital\_4)  
5662 0.83575 (lh.lateraloccipital\_3)(lh.lateraloccipital\_6)(lh.lingual\_1)(lh.pericalcarine\_3)  
5663 0.83575 (lh.lateralorbitofrontal\_4)(lh.rostralmiddlefrontal\_1)  
5664 0.83575 (lh.lateralorbitofrontal\_7)(lh.medialorbitofrontal\_2)(lh.rostralmiddlefrontal\_11)  
5665 0.83575 (lh.lingual\_7)(lh.parahippocampal\_3)  
5666 0.83575 (lh.paracentral\_1)(lh.paracentral\_5)(lh.precentral\_2)  
5667 0.83575 (lh.paracentral\_4)(lh.superiorfrontal\_14)(lh.superiorfrontal\_15)  
5668 0.83575 (lh.parsorbitalis\_1)(lh.parstriangularis\_3)(lh.rostralmiddlefrontal\_9)  
5669 0.83575 (lh.parstriangularis\_3)(lh.rostralmiddlefrontal\_12)(lh.rostralmiddlefrontal\_4)  
5670 0.83575 (lh.pericalcarine\_2)(lh.superiorparietal\_14)  
5671 0.83575 (lh.precentral\_11)(lh.precentral\_4)(lh.precentral\_9)  
5672 0.83575 (lh.precuneus\_10)(lh.precuneus\_6)(lh.superiorparietal\_6)  
5673 0.83575 (lh.precuneus\_10)(lh.superiorparietal\_5)  
5674 0.83575 (lh.rostralmiddlefrontal\_1)(lh.rostralmiddlefrontal\_12)(lh.rostralmiddlefrontal\_6)(lh.rostralmiddlefrontal\_9)  
5675 0.83575 (lh.rostralmiddlefrontal\_1)(lh.rostralmiddlefrontal\_4)(lh.rostralmiddlefrontal\_8)  
5676 0.83575 (lh.rostralmiddlefrontal\_9)(lh.superiorfrontal\_1)(lh.superiorfrontal\_4)  
5677 0.83575 (lh.superiorfrontal\_11)(lh.superiorfrontal\_14)(lh.superiorfrontal\_4)(lh.superiorfrontal\_7)(lh.superiorfrontal\_8)  
5678 0.83575 (lh.superiorfrontal\_11)(lh.superiorfrontal\_14)(lh.superiorfrontal\_4)(lh.superiorfrontal\_7)  
5679 0.83575 (lh.superiorfrontal\_14)(lh.superiorfrontal\_4)(lh.superiorfrontal\_8)(lh.superiorfrontal\_9)  
5680 0.83575 (lh.superiorparietal\_5)(lh.superiorparietal\_6)(lh.superiorparietal\_7)  
5681 0.83575 (rh.bankssts\_1)(rh.bankssts\_2)(rh.inferiortemporal\_6)  
5682 0.83575 (rh.bankssts\_1)(rh.inferiortemporal\_6)(rh.middletemporal\_2)  
5683 0.83575 (rh.bankssts\_1)(rh.superiortemporal\_3)  
5684 0.83575 (rh.bankssts\_2)(rh.fusiform\_7)  
5685 0.83575 (rh.caudalmiddlefrontal\_4)(rh.precentral\_1)  
5686 0.83575 (rh.caudalmiddlefrontal\_4)(rh.rostralmiddlefrontal\_3)(rh.rostralmiddlefrontal\_8)  
5687 0.83575 (rh.fusiform\_2)(rh.lateraloccipital\_8)(rh.lingual\_5)(rh.lingual\_7)  
5688 0.83575 (rh.fusiform\_5)(rh.inferiortemporal\_7)  
5689 0.83575 (rh.fusiform\_8)(rh.superiortemporal\_6)  
5690 0.83575 (rh.inferiorparietal\_4)(rh.insula\_2)(rh.supramarginal\_9)  
5691 0.83575 (rh.inferiorparietal\_8)(rh.superiorparietal\_11)  
5692 0.83575 (rh.inferiortemporal\_1)(rh.superiortemporal\_10)  
5693 0.83575 (rh.inferiortemporal\_5)(rh.inferiortemporal\_7)(rh.middletemporal\_2)  
5694 0.83575 (rh.insula\_2)(rh.transversetemporal\_1)  
5695 0.83575 (rh.insula\_3)(rh.precentral\_13)  
5696 0.83575 (rh.lateraloccipital\_3)(rh.lateraloccipital\_7)  
5697 0.83575 (rh.lateraloccipital\_7)(rh.pericalcarine\_1)  
5698 0.83575 (rh.lateralorbitofrontal\_2)(rh.lateralorbitofrontal\_7)(rh.rostralmiddlefrontal\_8)  
5699 0.83575 (rh.lateralorbitofrontal\_6)(rh.lateralorbitofrontal\_7)(rh.rostralmiddlefrontal\_8)  
5700 0.83575 (rh.paracentral\_4)(rh.superiorfrontal\_13)

5701 0.83575 (rh.precentral\_10)(rh.precentral\_12)(rh.precentral\_13)  
5702 0.83575 (rh.precentral\_11)(rh.precentral\_7)(rh.supramarginal\_1)  
5703 0.83575 (rh.precentral\_11)(rh.supramarginal\_9)  
5704 0.83575 (rh.precentral\_13)(rh.superiorfrontal\_14)(rh.superiorfrontal\_17)  
5705 0.83575 (rh.rostralmiddlefrontal\_10)(rh.superiorfrontal\_2)(rh.superiorfrontal\_4)  
5706 0.83575 (rh.superiorfrontal\_2)(rh.superiorfrontal\_6)(rh.superiorfrontal\_9)  
5707 0.83575 (rh.supramarginal\_1)(rh.supramarginal\_6)(rh.supramarginal\_8)(rh.supramarginal\_9)  
5708 0.83575 (Right-Accumbens-area)(Right-Amygdala)(Right-Caudate)(Right-Pallidum)(Right-Putamen)(Right-Thalamus-Proper)  
5709 0.83575 (Right-Accumbens-area)(Right-Amygdala)(Right-Caudate)(Right-Pallidum)(Right-Putamen)  
5710 0.83575 (Right-Accumbens-area)(Right-Amygdala)(Right-Caudate)(Right-Putamen)(Right-Thalamus-Proper)  
5711 0.83575 (Right-Accumbens-area)(Right-Amygdala)(Right-Caudate)(Right-Putamen)  
5712 0.83575 (Right-Amygdala)(rh.insula\_4)(rh.insula\_5)(rh.insula\_6)  
5713 0.83575 (Right-Amygdala)(Right-Putamen)(rh.insula\_4)(rh.insula\_5)(rh.insula\_6)  
5714 0.83575 (Right-Caudate)(rh.superiorfrontal\_2)(rh.superiorfrontal\_5)(rh.superiorfrontal\_7)  
5715 0.83575 (Right-Caudate)(Right-Pallidum)(Right-Thalamus-Proper)(rh.posteriorcingulate\_2)  
5716 0.83575 (Right-Caudate)(Right-Putamen)(rh.lateralorbitofrontal\_4)(rh.lateralorbitofrontal\_5)(rh.lateralorbitofrontal\_7)  
5717 0.83575 (Right-Caudate)(Right-Putamen)(rh.parstriangularis\_1)(rh.rostralmiddlefrontal\_12)  
5718 0.83575 (Right-Caudate)(Right-Putamen)(rh.precentral\_10)(rh.precentral\_13)  
5719 0.83575 (Right-Caudate)(Right-Putamen)(rh.superiorfrontal\_2)(rh.superiorfrontal\_7)  
5720 0.83575 (Right-Hippocampus)(rh.bankssts\_2)(rh.inferiorparietal\_4)(rh.insula\_2)  
5721 0.83575 (Right-Hippocampus)(rh.bankssts\_2)(rh.insula\_2)(rh.superiortemporal\_1)  
5722 0.83575 (Right-Hippocampus)(rh.isthmuscingulate\_2)(rh.precuneus\_2)(rh.precuneus\_7)  
5723 0.83575 (Right-Hippocampus)(Right-Putamen)(rh.supramarginal\_8)  
5724 0.83575 (Right-Pallidum)(Right-Thalamus-Proper)(rh.posteriorcingulate\_2)  
5725 0.83575 (Right-Putamen)(rh.caudalmiddlefrontal\_3)  
5726 0.83575 (Right-Putamen)(rh.lateralorbitofrontal\_6)(rh.rostralmiddlefrontal\_12)(rh.rostralmiddlefrontal\_13)  
5727 0.83575 (Right-Putamen)(rh.medialorbitofrontal\_2)(rh.rostralmiddlefrontal\_8)  
5728 0.83575 (Right-Putamen)(rh.parsopercularis\_4)(rh.rostralmiddlefrontal\_5)  
5729 0.83575 (Right-Putamen)(rh.superiorfrontal\_2)(rh.superiorfrontal\_5)  
5730 0.83333 (Left-Accumbens-area)(Left-Amygdala)(Left-Hippocampus)(Left-Thalamus-Proper)  
5731 0.83333 (Left-Accumbens-area)(Left-Amygdala)(Left-Hippocampus)  
5732 0.83333 (Left-Caudate)(Left-Putamen)(Left-Thalamus-Proper)(lh.insula\_1)(lh.supramarginal\_1)  
5733 0.83333 (Left-Caudate)(Left-Putamen)(lh.insula\_1)(lh.postcentral\_8)(lh.precentral\_11)  
5734 0.83333 (Left-Caudate)(Left-Putamen)(lh.insula\_6)(lh.parstriangularis\_3)(lh.rostralmiddlefrontal\_9)  
5735 0.83333 (Left-Caudate)(Left-Putamen)(lh.lateralorbitofrontal\_4)(lh.lateralorbitofrontal\_7)(lh.rostralmiddlefrontal\_9)  
5736 0.83333 (Left-Caudate)(Left-Putamen)(lh.lateralorbitofrontal\_6)(lh.rostralmiddlefrontal\_1)(lh.rostralmiddlefrontal\_9)  
5737 0.83333 (Left-Caudate)(Left-Putamen)(lh.precentral\_11)(lh.precentral\_7)(lh.precentral\_9)  
5738 0.83333 (Left-Caudate)(Left-Putamen)(lh.rostralmiddlefrontal\_4)(lh.superiorfrontal\_11)(lh.superiorfrontal\_4)  
5739 0.83333 (Left-Caudate)(Left-Putamen)(lh.rostralmiddlefrontal\_9)(lh.superiorfrontal\_3)  
5740 0.83333 (Left-Caudate)(lh.caudalanteriorcingulate\_2)(lh.superiorfrontal\_10)(lh.superiorfrontal\_4)  
5741 0.83333 (Left-Caudate)(lh.caudalmiddlefrontal\_5)(lh.caudalmiddlefrontal\_6)(lh.precentral\_9)  
5742 0.83333 (Left-Caudate)(lh.insula\_6)(lh.parsopercularis\_1)(lh.parsopercularis\_3)  
5743 0.83333 (Left-Caudate)(lh.insula\_6)(lh.parstriangularis\_3)(lh.rostralmiddlefrontal\_1)(lh.rostralmiddlefrontal\_9)  
5744 0.83333 (Left-Caudate)(lh.lateralorbitofrontal\_4)(lh.lateralorbitofrontal\_7)(lh.rostralmiddlefrontal\_12)  
5745 0.83333 (Left-Caudate)(lh.medialorbitofrontal\_2)(lh.parstriangularis\_3)(lh.rostralanteriorcingulate\_1)  
5746 0.83333 (Left-Caudate)(lh.posteriorcingulate\_3)(lh.precentral\_4)(lh.superiorfrontal\_14)  
5747 0.83333 (Left-Caudate)(lh.rostralmiddlefrontal\_12)(lh.superiorfrontal\_3)  
5748 0.83333 (Left-Caudate)(lh.rostralmiddlefrontal\_4)(lh.superiorfrontal\_10)(lh.superiorfrontal\_11)(lh.superiorfrontal\_4)  
5749 0.83333 (Left-Caudate)(lh.supramarginal\_4)  
5750 0.83333 (Left-Hippocampus)(lh.isthmuscingulate\_3)(lh.lingual\_7)

5751 0.83333 (Left-Putamen)(lh.caudalanteriorcingulate\_2)(lh.caudalmiddlefrontal\_3)(lh.caudalmiddlefrontal\_5)  
5752 0.83333 (Left-Putamen)(lh.caudalmiddlefrontal\_3)(lh.superiorfrontal\_11)(lh.superiorfrontal\_12)  
5753 0.83333 (Left-Putamen)(lh.lateralorbitofrontal\_4)(lh.medialorbitofrontal\_2)  
5754 0.83333 (Left-Putamen)(lh.medialorbitofrontal\_2)(lh.rostralanteriorcingulate\_1)(lh.rostralmiddlefrontal\_12)(lh.rostralmiddlefrontal\_9)(lh.superiorfrontal\_3)  
5755 0.83333 (Left-Putamen)(lh.rostralmiddlefrontal\_1)(lh.superiorfrontal\_4)  
5756 0.83333 (Left-Putamen)(lh.rostralmiddlefrontal\_4)(lh.rostralmiddlefrontal\_9)(lh.superiorfrontal\_3)  
5757 0.83333 (Left-Putamen)(lh.superiorparietal\_3)(lh.supramarginal\_1)  
5758 0.83333 (Left-Putamen)(lh.supramarginal\_1)(lh.supramarginal\_9)  
5759 0.83333 (lh.bankssts\_2)(lh.inferiortemporal\_6)(lh.inferiortemporal\_8)  
5760 0.83333 (lh.caudalanteriorcingulate\_2)(lh.superiorfrontal\_10)(lh.superiorfrontal\_14)(lh.superiorfrontal\_8)  
5761 0.83333 (lh.caudalmiddlefrontal\_2)(lh.rostralmiddlefrontal\_3)  
5762 0.83333 (lh.caudalmiddlefrontal\_3)(lh.parstriangularis\_3)(lh.rostralmiddlefrontal\_4)  
5763 0.83333 (lh.cuneus\_1)(lh.pericalcarine\_1)(lh.pericalcarine\_3)(lh.superiorparietal\_12)  
5764 0.83333 (lh.fusiform\_1)(lh.fusiform\_3)(lh.fusiform\_5)(lh.lateraloccipital\_9)  
5765 0.83333 (lh.fusiform\_2)(lh.lateraloccipital\_11)(lh.lingual\_1)(lh.pericalcarine\_3)  
5766 0.83333 (lh.fusiform\_7)(lh.inferiortemporal\_3)(lh.middletemporal\_3)  
5767 0.83333 (lh.fusiform\_7)(lh.middletemporal\_5)  
5768 0.83333 (lh.inferiortemporal\_8)(lh.middletemporal\_3)  
5769 0.83333 (lh.lateraloccipital\_2)(lh.pericalcarine\_1)(lh.pericalcarine\_2)(lh.pericalcarine\_3)  
5770 0.83333 (lh.lateralorbitofrontal\_2)(lh.lateralorbitofrontal\_7)(lh.medialorbitofrontal\_4)  
5771 0.83333 (lh.lateralorbitofrontal\_4)(lh.rostralmiddlefrontal\_6)(lh.rostralmiddlefrontal\_9)  
5772 0.83333 (lh.lateralorbitofrontal\_7)(lh.medialorbitofrontal\_1)(lh.medialorbitofrontal\_3)  
5773 0.83333 (lh.medialorbitofrontal\_1)(lh.rostralmiddlefrontal\_12)(lh.superiorfrontal\_1)  
5774 0.83333 (lh.paracentral\_4)(lh.paracentral\_5)(lh.superiorfrontal\_14)  
5775 0.83333 (lh.parsopercularis\_4)(lh.parstriangularis\_3)  
5776 0.83333 (lh.parstriangularis\_3)(lh.rostralmiddlefrontal\_12)(lh.rostralmiddlefrontal\_4)(lh.rostralmiddlefrontal\_9)  
5777 0.83333 (lh.posteriorcingulate\_1)(lh.posteriorcingulate\_2)(lh.posteriorcingulate\_3)  
5778 0.83333 (lh.precentral\_11)(lh.precentral\_16)  
5779 0.83333 (lh.precuneus\_9)(lh.superiorparietal\_5)(lh.superiorparietal\_6)  
5780 0.83333 (lh.rostralanteriorcingulate\_1)(lh.rostralmiddlefrontal\_8)(lh.superiorfrontal\_3)(lh.superiorfrontal\_4)  
5781 0.83333 (lh.rostralmiddlefrontal\_1)(lh.rostralmiddlefrontal\_9)(lh.superiorfrontal\_4)  
5782 0.83333 (lh.superiorfrontal\_10)(lh.superiorfrontal\_11)(lh.superiorfrontal\_4)(lh.superiorfrontal\_6)(lh.superiorfrontal\_8)  
5783 0.83333 (lh.superiorfrontal\_10)(lh.superiorfrontal\_11)(lh.superiorfrontal\_6)(lh.superiorfrontal\_8)  
5784 0.83333 (lh.superiorfrontal\_12)(lh.superiorfrontal\_14)(lh.superiorfrontal\_4)  
5785 0.83333 (lh.superiorfrontal\_3)(lh.superiorfrontal\_4)(lh.superiorfrontal\_5)(lh.superiorfrontal\_7)  
5786 0.83333 (lh.superiorfrontal\_3)(lh.superiorfrontal\_5)(lh.superiorfrontal\_7)  
5787 0.83333 (rh.bankssts\_1)(rh.fusiform\_7)  
5788 0.83333 (rh.cuneus\_4)(rh.superiorparietal\_13)  
5789 0.83333 (rh.fusiform\_1)(rh.lateraloccipital\_7)(rh.pericalcarine\_3)  
5790 0.83333 (rh.inferiorparietal\_4)(rh.inferiorparietal\_5)  
5791 0.83333 (rh.inferiortemporal\_3)(rh.inferiortemporal\_4)(rh.middletemporal\_7)  
5792 0.83333 (rh.inferiortemporal\_4)(rh.middletemporal\_4)(rh.middletemporal\_6)(rh.middletemporal\_7)  
5793 0.83333 (rh.insula\_3)(rh.precentral\_4)  
5794 0.83333 (rh.lateraloccipital\_3)(rh.lateraloccipital\_4)(rh.lateraloccipital\_7)  
5795 0.83333 (rh.lateraloccipital\_8)(rh.precuneus\_2)  
5796 0.83333 (rh.lateralorbitofrontal\_4)(rh.medialorbitofrontal\_2)  
5797 0.83333 (rh.lateralorbitofrontal\_5)(rh.lateralorbitofrontal\_6)(rh.lateralorbitofrontal\_7)  
5798 0.83333 (rh.lateralorbitofrontal\_6)(rh.parsorbitalis\_2)(rh.parstriangularis\_1)(rh.rostralmiddlefrontal\_12)  
5799 0.83333 (rh.paracentral\_4)(rh.paracentral\_6)(rh.precentral\_15)  
5800 0.83333 (rh.parsopercularis\_2)(rh.parsopercularis\_4)(rh.parstriangularis\_1)

5801 0.83333 (rh.parsopercularis\_4)(rh.rostralmiddlefrontal\_1)  
5802 0.83333 (rh.parsorbitalis\_1)(rh.parstriangularis\_1)(rh.parstriangularis\_3)  
5803 0.83333 (rh.parstriangularis\_1)(rh.rostralmiddlefrontal\_13)  
5804 0.83333 (rh.postcentral\_1)(rh.supramarginal\_8)  
5805 0.83333 (rh.postcentral\_4)(rh.precentral\_4)  
5806 0.83333 (rh.postcentral\_9)(rh.precentral\_13)  
5807 0.83333 (rh.precentral\_5)(rh.precentral\_7)(rh.precentral\_8)  
5808 0.83333 (rh.precuneus\_10)(rh.supramarginal\_9)  
5809 0.83333 (rh.precuneus\_4)(rh.precuneus\_7)(rh.superiorparietal\_11)  
5810 0.83333 (rh.precuneus\_7)(rh.precuneus\_8)(rh.superiorparietal\_8)  
5811 0.83333 (rh.rostralmiddlefrontal\_11)(rh.rostralmiddlefrontal\_12)(rh.rostralmiddlefrontal\_8)(rh.superiorfrontal\_2)  
5812 0.83333 (rh.rostralmiddlefrontal\_3)(rh.rostralmiddlefrontal\_7)  
5813 0.83333 (rh.rostralmiddlefrontal\_6)(rh.rostralmiddlefrontal\_7)(rh.rostralmiddlefrontal\_8)  
5814 0.83333 (rh.superiorfrontal\_2)(rh.superiorfrontal\_5)(rh.superiorfrontal\_6)(rh.superiorfrontal\_9)  
5815 0.83333 (rh.superiorfrontal\_2)(rh.superiorfrontal\_5)(rh.superiorfrontal\_8)(rh.superiorfrontal\_9)  
5816 0.83333 (rh.superiorparietal\_1)(rh.superiorparietal\_2)(rh.superiorparietal\_7)  
5817 0.83333 (Right-Caudate)(rh.lateralorbitofrontal\_6)(rh.lateralorbitofrontal\_7)(rh.medialorbitofrontal\_2)  
5818 0.83333 (Right-Caudate)(rh.lateralorbitofrontal\_7)(rh.medialorbitofrontal\_2)(rh.rostralmiddlefrontal\_12)  
5819 0.83333 (Right-Caudate)(rh.paracentral\_4)(rh.precentral\_13)  
5820 0.83333 (Right-Caudate)(rh.precentral\_10)(rh.precentral\_7)  
5821 0.83333 (Right-Caudate)(Right-Pallidum)(Right-Putamen)(Right-Thalamus-Proper)(rh.insula\_1)  
5822 0.83333 (Right-Caudate)(Right-Pallidum)(Right-Putamen)(Right-Thalamus-Proper)(rh.posteriorcingulate\_2)  
5823 0.83333 (Right-Caudate)(Right-Pallidum)(Right-Thalamus-Proper)(rh.insula\_1)  
5824 0.83333 (Right-Caudate)(Right-Putamen)(rh.insula\_1)(rh.precentral\_11)(rh.precentral\_7)  
5825 0.83333 (Right-Caudate)(Right-Putamen)(rh.lateralorbitofrontal\_7)(rh.medialorbitofrontal\_2)(rh.rostralmiddlefrontal\_12)  
5826 0.83333 (Right-Pallidum)(Right-Putamen)(Right-Thalamus-Proper)(rh.posteriorcingulate\_2)  
5827 0.83333 (Right-Putamen)(rh.insula\_3)(rh.precentral\_13)  
5828 0.83333 (Right-Putamen)(rh.lateralorbitofrontal\_6)(rh.rostralmiddlefrontal\_3)  
5829 0.83333 (Right-Putamen)(rh.parstriangularis\_1)(rh.rostralanteriorcingulate\_2)  
5830 0.83333 (Right-Putamen)(rh.precentral\_7)(rh.precentral\_8)  
5831 0.83092 (Left-Caudate)(Left-Pallidum)(Left-Putamen)(Left-Thalamus-Proper)(lh.postcentral\_8)  
5832 0.83092 (Left-Caudate)(Left-Pallidum)(Left-Thalamus-Proper)(lh.postcentral\_8)  
5833 0.83092 (Left-Caudate)(Left-Putamen)(lh.caudalanteriorcingulate\_2)(lh.superiorfrontal\_11)(lh.superiorfrontal\_4)  
5834 0.83092 (Left-Caudate)(Left-Putamen)(lh.caudalmiddlefrontal\_1)(lh.superiorfrontal\_11)  
5835 0.83092 (Left-Caudate)(Left-Putamen)(lh.caudalmiddlefrontal\_3)(lh.insula\_6)(lh.parstriangularis\_3)  
5836 0.83092 (Left-Caudate)(Left-Putamen)(lh.lateralorbitofrontal\_1)  
5837 0.83092 (Left-Caudate)(Left-Putamen)(lh.lateralorbitofrontal\_4)(lh.lateralorbitofrontal\_7)(lh.rostralmiddlefrontal\_12)  
5838 0.83092 (Left-Caudate)(Left-Putamen)(lh.lateralorbitofrontal\_7)(lh.parstriangularis\_3)(lh.rostralmiddlefrontal\_12)(lh.rostralmiddlefrontal\_9)  
5839 0.83092 (Left-Caudate)(Left-Putamen)(lh.parstriangularis\_3)(lh.rostralanteriorcingulate\_1)(lh.rostralanteriorcingulate\_2)  
5840 0.83092 (Left-Caudate)(Left-Putamen)(lh.rostralmiddlefrontal\_8)(lh.rostralmiddlefrontal\_9)  
5841 0.83092 (Left-Caudate)(Left-Thalamus-Proper)(lh.isthmuscingulate\_2)  
5842 0.83092 (Left-Caudate)(lh.caudalmiddlefrontal\_1)(lh.rostralmiddlefrontal\_1)(lh.rostralmiddlefrontal\_4)  
5843 0.83092 (Left-Caudate)(lh.caudalmiddlefrontal\_4)(lh.caudalmiddlefrontal\_6)(lh.superiorfrontal\_12)  
5844 0.83092 (Left-Caudate)(lh.insula\_6)(lh.parsopercularis\_3)(lh.parstriangularis\_3)(lh.rostralmiddlefrontal\_1)  
5845 0.83092 (Left-Caudate)(lh.insula\_6)(lh.rostralanteriorcingulate\_2)  
5846 0.83092 (Left-Caudate)(lh.lateralorbitofrontal\_1)  
5847 0.83092 (Left-Caudate)(lh.lateralorbitofrontal\_2)(lh.medialorbitofrontal\_4)  
5848 0.83092 (Left-Caudate)(lh.lateralorbitofrontal\_4)(lh.lateralorbitofrontal\_6)(lh.lateralorbitofrontal\_7)  
5849 0.83092 (Left-Caudate)(lh.lateralorbitofrontal\_4)(lh.rostralanteriorcingulate\_1)(lh.rostralmiddlefrontal\_9)  
5850 0.83092 (Left-Caudate)(lh.lateralorbitofrontal\_6)(lh.lateralorbitofrontal\_7)(lh.parstriangularis\_3)(lh.rostralmiddlefrontal\_9)

5851 0.83092 (Left-Caudate)(lh.lateralorbitofrontal\_7)(lh.medialorbitofrontal\_4)(lh.rostralanteriorcingulate\_1)  
5852 0.83092 (Left-Caudate)(lh.lateralorbitofrontal\_7)(lh.parstriangularis\_3)(lh.rostralanteriorcingulate\_1)(lh.rostralmiddlefrontal\_12)  
5853 0.83092 (Left-Caudate)(lh.medialorbitofrontal\_2)(lh.rostralmiddlefrontal\_12)(lh.superiorfrontal\_3)  
5854 0.83092 (Left-Caudate)(lh.paracentral\_5)(lh.posteriorcingulate\_3)(lh.precentral\_4)  
5855 0.83092 (Left-Caudate)(lh.posteriorcingulate\_1)(lh.posteriorcingulate\_2)(lh.posteriorcingulate\_3)  
5856 0.83092 (Left-Caudate)(lh.rostralmiddlefrontal\_1)(lh.rostralmiddlefrontal\_4)(lh.superiorfrontal\_4)  
5857 0.83092 (Left-Hippocampus)(lh.entorhinal\_1)(lh.insula\_4)  
5858 0.83092 (Left-Hippocampus)(lh.inferiorparietal\_5)(lh.lingual\_8)  
5859 0.83092 (Left-Putamen)(Left-Thalamus-Proper)(lh.precentral\_14)  
5860 0.83092 (Left-Putamen)(lh.caudalmiddlefrontal\_1)(lh.caudalmiddlefrontal\_3)(lh.rostralmiddlefrontal\_1)  
5861 0.83092 (Left-Putamen)(lh.caudalmiddlefrontal\_3)(lh.parsopercularis\_3)(lh.rostralmiddlefrontal\_1)  
5862 0.83092 (Left-Putamen)(lh.caudalmiddlefrontal\_5)(lh.superiorfrontal\_12)  
5863 0.83092 (Left-Putamen)(lh.insula\_6)(lh.rostralanteriorcingulate\_2)  
5864 0.83092 (Left-Putamen)(lh.lateralorbitofrontal\_7)(lh.rostralmiddlefrontal\_1)  
5865 0.83092 (Left-Putamen)(lh.posteriorcingulate\_1)(lh.superiorfrontal\_12)  
5866 0.83092 (Left-Putamen)(lh.precentral\_4)(lh.precentral\_9)  
5867 0.83092 (Left-Putamen)(lh.superiorfrontal\_14)(lh.superiorfrontal\_4)  
5868 0.83092 (lh.cuneus\_1)(lh.pericalcarine\_3)(lh.precuneus\_9)  
5869 0.83092 (lh.cuneus\_2)(lh.pericalcarine\_1)(lh.superiorparietal\_12)  
5870 0.83092 (lh.fusiform\_1)(lh.fusiform\_2)(lh.fusiform\_5)(lh.lateraloccipital\_9)  
5871 0.83092 (lh.fusiform\_2)(lh.lateraloccipital\_6)(lh.lateraloccipital\_7)(lh.lateraloccipital\_9)  
5872 0.83092 (lh.fusiform\_2)(lh.lingual\_6)(lh.lingual\_8)(lh.pericalcarine\_3)  
5873 0.83092 (lh.fusiform\_5)(lh.inferiorparietal\_4)(lh.lingual\_8)  
5874 0.83092 (lh.fusiform\_8)(lh.insula\_4)  
5875 0.83092 (lh.insula\_6)(lh.precentral\_16)  
5876 0.83092 (lh.lateraloccipital\_3)(lh.lateraloccipital\_6)(lh.lingual\_1)(lh.pericalcarine\_2)  
5877 0.83092 (lh.lateraloccipital\_6)(lh.lateraloccipital\_7)(lh.lingual\_8)  
5878 0.83092 (lh.lateraloccipital\_6)(lh.lingual\_1)(lh.lingual\_3)  
5879 0.83092 (lh.lateraloccipital\_6)(lh.lingual\_4)(lh.lingual\_8)  
5880 0.83092 (lh.lateralorbitofrontal\_4)(lh.lateralorbitofrontal\_6)(lh.parstriangularis\_1)(lh.parstriangularis\_3)  
5881 0.83092 (lh.lateralorbitofrontal\_4)(lh.parstriangularis\_3)(lh.rostralanteriorcingulate\_1)(lh.rostralmiddlefrontal\_12)  
5882 0.83092 (lh.lateralorbitofrontal\_6)(lh.lateralorbitofrontal\_7)(lh.medialorbitofrontal\_2)(lh.rostralmiddlefrontal\_12)  
5883 0.83092 (lh.lateralorbitofrontal\_6)(lh.lateralorbitofrontal\_7)(lh.rostralmiddlefrontal\_12)(lh.rostralmiddlefrontal\_6)(lh.rostralmiddlefrontal\_9)  
5884 0.83092 (lh.lateralorbitofrontal\_6)(lh.medialorbitofrontal\_2)(lh.rostralmiddlefrontal\_12)(lh.rostralmiddlefrontal\_9)  
5885 0.83092 (lh.lateralorbitofrontal\_7)(lh.medialorbitofrontal\_2)(lh.rostralmiddlefrontal\_9)(lh.superiorfrontal\_3)  
5886 0.83092 (lh.lateralorbitofrontal\_7)(lh.rostralanteriorcingulate\_1)(lh.superiorfrontal\_3)  
5887 0.83092 (lh.lateralorbitofrontal\_7)(lh.rostralmiddlefrontal\_12)(lh.rostralmiddlefrontal\_9)(lh.superiorfrontal\_3)  
5888 0.83092 (lh.lingual\_6)(lh.lingual\_8)(lh.precuneus\_11)  
5889 0.83092 (lh.parsopercularis\_1)(lh.parsopercularis\_4)(lh.parstriangularis\_3)  
5890 0.83092 (lh.posteriorcingulate\_3)(lh.superiorfrontal\_14)(lh.superiorfrontal\_8)  
5891 0.83092 (lh.precentral\_5)(lh.precentral\_6)(lh.precentral\_7)  
5892 0.83092 (lh.precuneus\_3)(lh.superiorparietal\_9)  
5893 0.83092 (lh.rostralanteriorcingulate\_1)(lh.superiorfrontal\_2)(lh.superiorfrontal\_4)  
5894 0.83092 (lh.rostralmiddlefrontal\_1)(lh.rostralmiddlefrontal\_4)(lh.rostralmiddlefrontal\_7)(lh.rostralmiddlefrontal\_9)  
5895 0.83092 (lh.rostralmiddlefrontal\_4)(lh.rostralmiddlefrontal\_5)(lh.rostralmiddlefrontal\_9)  
5896 0.83092 (lh.rostralmiddlefrontal\_9)(lh.superiorfrontal\_1)(lh.superiorfrontal\_3)(lh.superiorfrontal\_4)  
5897 0.83092 (lh.superiorfrontal\_10)(lh.superiorfrontal\_3)(lh.superiorfrontal\_4)(lh.superiorfrontal\_7)  
5898 0.83092 (lh.superiorfrontal\_10)(lh.superiorfrontal\_3)(lh.superiorfrontal\_7)  
5899 0.83092 (lh.superiorfrontal\_10)(lh.superiorfrontal\_5)(lh.superiorfrontal\_6)(lh.superiorfrontal\_7)  
5900 0.83092 (lh.superiortemporal\_2)(lh.superiortemporal\_3)

5901 0.83092 (rh.bankssts\_2)(rh.fusiform\_5)  
5902 0.83092 (rh.bankssts\_2)(rh.inferiorparietal\_10)(rh.inferiorparietal\_9)  
5903 0.83092 (rh.caudalmiddlefrontal\_4)(rh.rostralmiddlefrontal\_4)  
5904 0.83092 (rh.caudalmiddlefrontal\_4)(rh.superiorfrontal\_13)(rh.superiorfrontal\_7)(rh.superiorfrontal\_9)  
5905 0.83092 (rh.caudalmiddlefrontal\_5)(rh.rostralmiddlefrontal\_1)(rh.superiorfrontal\_7)  
5906 0.83092 (rh.fusiform\_8)(rh.superiortemporal\_7)  
5907 0.83092 (rh.inferiorparietal\_10)(rh.lateraloccipital\_8)(rh.lingual\_5)  
5908 0.83092 (rh.inferiortemporal\_2)(rh.superiortemporal\_6)(rh.superiortemporal\_7)  
5909 0.83092 (rh.inferiortemporal\_3)(rh.middletemporal\_5)  
5910 0.83092 (rh.lateraloccipital\_3)(rh.lateraloccipital\_4)(rh.lateraloccipital\_5)  
5911 0.83092 (rh.lateraloccipital\_3)(rh.lateraloccipital\_4)(rh.pericalcarine\_1)(rh.superiorparietal\_11)  
5912 0.83092 (rh.lateraloccipital\_5)(rh.lateraloccipital\_6)(rh.lateraloccipital\_7)  
5913 0.83092 (rh.lateraloccipital\_8)(rh.lingual\_2)(rh.lingual\_4)  
5914 0.83092 (rh.lateralorbitofrontal\_1)(rh.lateralorbitofrontal\_2)  
5915 0.83092 (rh.lateralorbitofrontal\_6)(rh.lateralorbitofrontal\_7)(rh.parstriangularis\_4)(rh.rostralmiddlefrontal\_12)  
5916 0.83092 (rh.lateralorbitofrontal\_6)(rh.parstriangularis\_1)(rh.rostralmiddlefrontal\_13)  
5917 0.83092 (rh.lateralorbitofrontal\_7)(rh.rostralmiddlefrontal\_11)(rh.rostralmiddlefrontal\_12)(rh.superiorfrontal\_2)  
5918 0.83092 (rh.lingual\_5)(rh.lingual\_6)(rh.lingual\_7)  
5919 0.83092 (rh.lingual\_5)(rh.pericalcarine\_1)  
5920 0.83092 (rh.medialorbitofrontal\_2)(rh.medialorbitofrontal\_3)  
5921 0.83092 (rh.parsopercularis\_1)(rh.rostralmiddlefrontal\_3)  
5922 0.83092 (rh.parstriangularis\_1)(rh.rostralmiddlefrontal\_7)  
5923 0.83092 (rh.postcentral\_1)(rh.postcentral\_3)(rh.precentral\_1)  
5924 0.83092 (rh.postcentral\_9)(rh.supramarginal\_1)  
5925 0.83092 (rh.precentral\_3)(rh.precentral\_6)  
5926 0.83092 (rh.precuneus\_10)(rh.superiorparietal\_1)(rh.superiorparietal\_7)(rh.superiorparietal\_8)  
5927 0.83092 (rh.precuneus\_5)(rh.precuneus\_8)(rh.superiorparietal\_8)  
5928 0.83092 (rh.precuneus\_6)(rh.precuneus\_7)  
5929 0.83092 (rh.precuneus\_7)(rh.superiorparietal\_1)(rh.superiorparietal\_10)(rh.superiorparietal\_7)  
5930 0.83092 (rh.rostralanterocingulate\_1)(rh.rostralmiddlefrontal\_8)  
5931 0.83092 (rh.rostralmiddlefrontal\_1)(rh.rostralmiddlefrontal\_3)(rh.rostralmiddlefrontal\_8)  
5932 0.83092 (rh.superiorfrontal\_13)(rh.superiorfrontal\_5)(rh.superiorfrontal\_8)(rh.superiorfrontal\_9)  
5933 0.83092 (Right-Amygdala)(rh.temporalpole\_1)  
5934 0.83092 (Right-Caudate)(rh.caudalmiddlefrontal\_4)(rh.superiorfrontal\_7)(rh.superiorfrontal\_9)  
5935 0.83092 (Right-Caudate)(rh.insula\_2)(rh.supramarginal\_9)  
5936 0.83092 (Right-Caudate)(rh.precentral\_13)(rh.superiorfrontal\_14)  
5937 0.83092 (Right-Caudate)(rh.rostralmiddlefrontal\_1)(rh.rostralmiddlefrontal\_5)  
5938 0.83092 (Right-Caudate)(Right-Putamen)(rh.caudalmiddlefrontal\_4)(rh.parsopercularis\_4)(rh.rostralmiddlefrontal\_3)  
5939 0.83092 (Right-Caudate)(Right-Putamen)(rh.insula\_2)(rh.supramarginal\_9)  
5940 0.83092 (Right-Caudate)(Right-Putamen)(rh.lateralorbitofrontal\_6)(rh.lateralorbitofrontal\_7)(rh.medialorbitofrontal\_2)  
5941 0.83092 (Right-Caudate)(Right-Putamen)(rh.precentral\_10)(rh.precentral\_7)  
5942 0.83092 (Right-Caudate)(Right-Putamen)(rh.precentral\_8)  
5943 0.83092 (Right-Caudate)(Right-Putamen)(rh.superiorfrontal\_5)  
5944 0.83092 (Right-Hippocampus)(rh.fusiform\_7)(rh.middletemporal\_4)  
5945 0.83092 (Right-Putamen)(rh.insula\_1)(rh.supramarginal\_1)(rh.supramarginal\_8)(rh.supramarginal\_9)  
5946 0.83092 (Right-Putamen)(rh.lateralorbitofrontal\_5)(rh.lateralorbitofrontal\_6)  
5947 0.83092 (Right-Putamen)(rh.parsopercularis\_2)(rh.precentral\_1)  
5948 0.8285 (Left-Caudate)(Left-Putamen)(Left-Thalamus-Proper)(lh.postcentral\_8)(lh.precentral\_4)  
5949 0.8285 (Left-Caudate)(Left-Putamen)(lh.caudalanterocingulate\_1)(lh.posteriorcingulate\_1)  
5950 0.8285 (Left-Caudate)(Left-Putamen)(lh.caudalmiddlefrontal\_1)(lh.rostralmiddlefrontal\_1)

5951 0.8285 (Left-Caudate)(Left-Putamen)(lh.caudalmiddlefrontal\_3)(lh.parstriangularis\_3)(lh.rostralmiddlefrontal\_1)  
5952 0.8285 (Left-Caudate)(Left-Putamen)(lh.caudalmiddlefrontal\_3)(lh.rostralmiddlefrontal\_1)(lh.rostralmiddlefrontal\_9)  
5953 0.8285 (Left-Caudate)(Left-Putamen)(lh.insula\_6)(lh.parstriangularis\_3)(lh.rostralmiddlefrontal\_4)  
5954 0.8285 (Left-Caudate)(Left-Putamen)(lh.lateralorbitofrontal\_4)(lh.lateralorbitofrontal\_6)(lh.lateralorbitofrontal\_7)  
5955 0.8285 (Left-Caudate)(Left-Putamen)(lh.lateralorbitofrontal\_4)(lh.lateralorbitofrontal\_6)(lh.parstriangularis\_3)  
5956 0.8285 (Left-Caudate)(Left-Putamen)(lh.lateralorbitofrontal\_4)(lh.rostralanteriorcingulate\_1)(lh.rostralmiddlefrontal\_9)  
5957 0.8285 (Left-Caudate)(Left-Putamen)(lh.posteriorcingulate\_1)(lh.superiorfrontal\_12)  
5958 0.8285 (Left-Caudate)(Left-Putamen)(lh.rostralmiddlefrontal\_1)(lh.rostralmiddlefrontal\_12)(lh.rostralmiddlefrontal\_9)  
5959 0.8285 (Left-Caudate)(Left-Putamen)(lh.superiorfrontal\_11)(lh.superiorfrontal\_12)(lh.superiorfrontal\_14)  
5960 0.8285 (Left-Caudate)(lh.caudalanteriorcingulate\_1)(lh.caudalanteriorcingulate\_2)(lh.superiorfrontal\_10)  
5961 0.8285 (Left-Caudate)(lh.caudalanteriorcingulate\_1)(lh.rostralanteriorcingulate\_2)(lh.rostralmiddlefrontal\_4)  
5962 0.8285 (Left-Caudate)(lh.caudalmiddlefrontal\_3)(lh.insula\_6)(lh.parsopercularis\_3)  
5963 0.8285 (Left-Caudate)(lh.isthmuscingulate\_1)(lh.posteriorcingulate\_2)  
5964 0.8285 (Left-Caudate)(lh.lateralorbitofrontal\_7)(lh.rostralmiddlefrontal\_1)  
5965 0.8285 (Left-Caudate)(lh.paracentral\_5)(lh.superiorfrontal\_8)  
5966 0.8285 (Left-Caudate)(lh.parstriangularis\_3)(lh.rostralanteriorcingulate\_1)(lh.rostralmiddlefrontal\_4)(lh.rostralmiddlefrontal\_9)  
5967 0.8285 (Left-Caudate)(lh.rostralanteriorcingulate\_1)(lh.rostralanteriorcingulate\_2)(lh.rostralmiddlefrontal\_4)(lh.superiorfrontal\_4)  
5968 0.8285 (Left-Putamen)(lh.caudalanteriorcingulate\_1)(lh.posteriorcingulate\_1)  
5969 0.8285 (Left-Putamen)(lh.caudalmiddlefrontal\_3)(lh.insula\_6)(lh.rostralmiddlefrontal\_1)(lh.rostralmiddlefrontal\_4)  
5970 0.8285 (Left-Putamen)(lh.caudalmiddlefrontal\_3)(lh.rostralmiddlefrontal\_4)(lh.superiorfrontal\_11)  
5971 0.8285 (Left-Putamen)(lh.lateralorbitofrontal\_6)(lh.rostralmiddlefrontal\_1)(lh.rostralmiddlefrontal\_12)  
5972 0.8285 (Left-Putamen)(lh.medialorbitofrontal\_2)(lh.parstriangularis\_3)(lh.rostralanteriorcingulate\_1)(lh.rostralmiddlefrontal\_9)  
5973 0.8285 (Left-Putamen)(lh.medialorbitofrontal\_2)(lh.rostralmiddlefrontal\_9)(lh.superiorfrontal\_4)  
5974 0.8285 (Left-Thalamus-Proper)(lh.paracentral\_5)(lh.postcentral\_3)  
5975 0.8285 (Left-Thalamus-Proper)(lh.precentral\_7)(lh.precentral\_9)  
5976 0.8285 (lh.caudalanteriorcingulate\_1)(lh.rostralanteriorcingulate\_2)(lh.superiorfrontal\_10)  
5977 0.8285 (lh.caudalmiddlefrontal\_3)(lh.caudalmiddlefrontal\_4)(lh.superiorfrontal\_12)  
5978 0.8285 (lh.cuneus\_1)(lh.lateraloccipital\_2)(lh.superiorparietal\_12)  
5979 0.8285 (lh.cuneus\_3)(lh.lateraloccipital\_1)(lh.pericalcarine\_1)  
5980 0.8285 (lh.fusiform\_1)(lh.fusiform\_2)(lh.fusiform\_3)(lh.lateraloccipital\_9)  
5981 0.8285 (lh.fusiform\_1)(lh.fusiform\_2)(lh.lingual\_6)  
5982 0.8285 (lh.fusiform\_2)(lh.lateraloccipital\_7)(lh.lingual\_8)(lh.pericalcarine\_3)  
5983 0.8285 (lh.inferiorparietal\_8)(lh.superiorparietal\_11)(lh.superiorparietal\_6)  
5984 0.8285 (lh.insula\_2)(lh.insula\_4)  
5985 0.8285 (lh.insula\_6)(lh.lateralorbitofrontal\_6)(lh.parstriangularis\_3)(lh.rostralmiddlefrontal\_1)  
5986 0.8285 (lh.lateraloccipital\_10)(lh.lateraloccipital\_11)(lh.lateraloccipital\_6)  
5987 0.8285 (lh.lateraloccipital\_9)(lh.middletemporal\_1)  
5988 0.8285 (lh.lateralorbitofrontal\_4)(lh.medialorbitofrontal\_2)(lh.rostralmiddlefrontal\_9)  
5989 0.8285 (lh.lateralorbitofrontal\_4)(lh.parstriangularis\_3)(lh.rostralmiddlefrontal\_6)  
5990 0.8285 (lh.lateralorbitofrontal\_6)(lh.lateralorbitofrontal\_7)(lh.rostralmiddlefrontal\_1)  
5991 0.8285 (lh.lateralorbitofrontal\_6)(lh.parsorbitalis\_1)(lh.parstriangularis\_3)(lh.rostralmiddlefrontal\_9)  
5992 0.8285 (lh.lateralorbitofrontal\_7)(lh.rostralmiddlefrontal\_1)(lh.rostralmiddlefrontal\_9)  
5993 0.8285 (lh.medialorbitofrontal\_2)(lh.rostralanteriorcingulate\_1)(lh.superiorfrontal\_1)  
5994 0.8285 (lh.paracentral\_4)(lh.superiorfrontal\_15)(lh.superiorfrontal\_16)(lh.superiorfrontal\_18)  
5995 0.8285 (lh.parsopercularis\_1)(lh.parsopercularis\_2)(lh.parsopercularis\_3)(lh.parstriangularis\_3)  
5996 0.8285 (lh.precentral\_11)(lh.precentral\_13)(lh.precentral\_9)  
5997 0.8285 (lh.precentral\_12)(lh.precentral\_13)  
5998 0.8285 (lh.precuneus\_5)(lh.superiorparietal\_9)  
5999 0.8285 (lh.rostralanteriorcingulate\_1)(lh.rostralmiddlefrontal\_4)(lh.rostralmiddlefrontal\_9)(lh.superiorfrontal\_3)  
6000 0.8285 (lh.rostralanteriorcingulate\_2)(lh.rostralmiddlefrontal\_4)(lh.rostralmiddlefrontal\_8)(lh.superiorfrontal\_4)



6001 0.8285 (lh.superiorfrontal\_10)(lh.superiorfrontal\_11)(lh.superiorfrontal\_14)(lh.superiorfrontal\_4)(lh.superiorfrontal\_8)  
6002 0.8285 (lh.superiorfrontal\_10)(lh.superiorfrontal\_11)(lh.superiorfrontal\_14)(lh.superiorfrontal\_4)  
6003 0.8285 (lh.superiorfrontal\_10)(lh.superiorfrontal\_11)(lh.superiorfrontal\_4)(lh.superiorfrontal\_9)  
6004 0.8285 (lh.superiorfrontal\_10)(lh.superiorfrontal\_12)  
6005 0.8285 (lh.superiorfrontal\_10)(lh.superiorfrontal\_4)(lh.superiorfrontal\_5)(lh.superiorfrontal\_6)(lh.superiorfrontal\_7)  
6006 0.8285 (lh.superiorfrontal\_12)(lh.superiorfrontal\_14)(lh.superiorfrontal\_4)(lh.superiorfrontal\_8)  
6007 0.8285 (lh.supramarginal\_5)(lh.supramarginal\_6)  
6008 0.8285 (rh.caudalmiddlefrontal\_5)(rh.parsopercularis\_4)  
6009 0.8285 (rh.caudalmiddlefrontal\_5)(rh.precentral\_13)  
6010 0.8285 (rh.fusiform\_1)(rh.fusiform\_2)(rh.fusiform\_3)(rh.lateraloccipital\_8)  
6011 0.8285 (rh.fusiform\_4)(rh.fusiform\_5)  
6012 0.8285 (rh.inferiorparietal\_10)(rh.lateraloccipital\_10)(rh.lingual\_5)  
6013 0.8285 (rh.inferiortemporal\_4)(rh.inferiortemporal\_5)(rh.inferiortemporal\_6)  
6014 0.8285 (rh.inferiortemporal\_4)(rh.middletemporal\_2)  
6015 0.8285 (rh.insula\_1)(rh.superiorparietal\_1)(rh.supramarginal\_1)(rh.supramarginal\_8)(rh.supramarginal\_9)  
6016 0.8285 (rh.lateraloccipital\_1)(rh.lateraloccipital\_3)(rh.pericalcarine\_2)(rh.superiorparietal\_11)  
6017 0.8285 (rh.lateraloccipital\_1)(rh.lateraloccipital\_4)(rh.pericalcarine\_2)  
6018 0.8285 (rh.lateraloccipital\_3)(rh.pericalcarine\_2)(rh.pericalcarine\_4)  
6019 0.8285 (rh.lateraloccipital\_4)(rh.lateraloccipital\_8)(rh.lingual\_2)(rh.pericalcarine\_1)  
6020 0.8285 (rh.lateralorbitofrontal\_2)(rh.lateralorbitofrontal\_6)(rh.rostralmiddlefrontal\_8)  
6021 0.8285 (rh.lateralorbitofrontal\_6)(rh.lateralorbitofrontal\_7)(rh.rostralmiddlefrontal\_12)(rh.rostralmiddlefrontal\_8)  
6022 0.8285 (rh.lateralorbitofrontal\_6)(rh.parstriangularis\_4)(rh.rostralmiddlefrontal\_3)  
6023 0.8285 (rh.middletemporal\_2)(rh.middletemporal\_4)  
6024 0.8285 (rh.paracentral\_4)(rh.superiorfrontal\_14)(rh.superiorfrontal\_17)  
6025 0.8285 (rh.parsorbitalis\_2)(rh.parstriangularis\_3)  
6026 0.8285 (rh.pericalcarine\_3)(rh.pericalcarine\_4)  
6027 0.8285 (rh.postcentral\_10)(rh.posteriorcingulate\_4)  
6028 0.8285 (rh.postcentral\_10)(rh.superiorparietal\_1)(rh.supramarginal\_1)  
6029 0.8285 (rh.precentral\_10)(rh.precentral\_11)  
6030 0.8285 (rh.precentral\_14)(rh.superiorfrontal\_16)  
6031 0.8285 (rh.precuneus\_7)(rh.superiorparietal\_1)(rh.superiorparietal\_8)  
6032 0.8285 (rh.rostralmiddlefrontal\_1)(rh.superiorfrontal\_2)  
6033 0.8285 (rh.superiorfrontal\_10)(rh.superiorfrontal\_13)(rh.superiorfrontal\_8)(rh.superiorfrontal\_9)  
6034 0.8285 (rh.superiorfrontal\_11)(rh.superiorfrontal\_14)(rh.superiorfrontal\_16)  
6035 0.8285 (rh.superiorfrontal\_12)(rh.superiorfrontal\_17)  
6036 0.8285 (rh.superiorfrontal\_13)(rh.superiorfrontal\_5)(rh.superiorfrontal\_7)  
6037 0.8285 (Right-Caudate)(rh.caudalmiddlefrontal\_4)(rh.caudalmiddlefrontal\_5)(rh.rostralmiddlefrontal\_1)  
6038 0.8285 (Right-Caudate)(rh.caudalmiddlefrontal\_4)(rh.caudalmiddlefrontal\_5)(rh.superiorfrontal\_7)  
6039 0.8285 (Right-Caudate)(rh.insula\_7)(rh.lateralorbitofrontal\_2)  
6040 0.8285 (Right-Caudate)(rh.lateralorbitofrontal\_2)(rh.rostralmiddlefrontal\_12)  
6041 0.8285 (Right-Caudate)(rh.lateralorbitofrontal\_7)(rh.rostralmiddlefrontal\_8)  
6042 0.8285 (Right-Caudate)(rh.precentral\_13)(rh.superiorfrontal\_13)  
6043 0.8285 (Right-Caudate)(rh.rostralanteriorcingulate\_2)(rh.rostralmiddlefrontal\_8)  
6044 0.8285 (Right-Caudate)(Right-Putamen)(rh.insula\_7)(rh.lateralorbitofrontal\_2)  
6045 0.8285 (Right-Caudate)(Right-Putamen)(rh.lateralorbitofrontal\_2)(rh.rostralmiddlefrontal\_12)  
6046 0.8285 (Right-Hippocampus)(rh.insula\_1)(rh.insula\_2)(rh.supramarginal\_9)  
6047 0.8285 (Right-Hippocampus)(Right-Putamen)(rh.insula\_1)(rh.insula\_2)(rh.supramarginal\_9)  
6048 0.8285 (Right-Putamen)(rh.caudalmiddlefrontal\_4)(rh.precentral\_10)  
6049 0.8285 (Right-Putamen)(rh.lateralorbitofrontal\_2)(rh.lateralorbitofrontal\_6)(rh.rostralmiddlefrontal\_8)  
6050 0.8285 (Right-Putamen)(rh.lateralorbitofrontal\_4)(rh.medialorbitofrontal\_2)

6051 0.8285 (Right-Putamen)(rh.lateralorbitofrontal\_6)(rh.lateralorbitofrontal\_7)(rh.rostralmiddlefrontal\_8)  
6052 0.8285 (Right-Putamen)(rh.rostralmiddlefrontal\_1)(rh.superiorfrontal\_7)  
6053 0.82609 (Left-Accumbens-area)(Left-Amygdala)(Left-Hippocampus)(Left-Pallidum)(Left-Thalamus-Proper)  
6054 0.82609 (Left-Accumbens-area)(Left-Amygdala)(Left-Hippocampus)(Left-Pallidum)  
6055 0.82609 (Left-Accumbens-area)(Left-Amygdala)(Left-Hippocampus)(Left-Putamen)(Left-Thalamus-Proper)  
6056 0.82609 (Left-Accumbens-area)(Left-Amygdala)(Left-Hippocampus)(Left-Putamen)  
6057 0.82609 (Left-Amygdala)(Left-Hippocampus)(lh.superiortemporal\_11)  
6058 0.82609 (Left-Amygdala)(lh.entorhinal\_1)(lh.insula\_4)  
6059 0.82609 (Left-Caudate)(Left-Putamen)(Left-Thalamus-Proper)(lh.paracentral\_5)  
6060 0.82609 (Left-Caudate)(Left-Putamen)(lh.caudalanteriorcingulate\_2)(lh.caudalmiddlefrontal\_3)(lh.caudalmiddlefrontal\_5)  
6061 0.82609 (Left-Caudate)(Left-Putamen)(lh.caudalanteriorcingulate\_2)(lh.superiorfrontal\_10)  
6062 0.82609 (Left-Caudate)(Left-Putamen)(lh.caudalmiddlefrontal\_3)(lh.insula\_6)(lh.parsopercularis\_3)  
6063 0.82609 (Left-Caudate)(Left-Putamen)(lh.caudalmiddlefrontal\_3)(lh.superiorfrontal\_11)(lh.superiorfrontal\_12)  
6064 0.82609 (Left-Caudate)(Left-Putamen)(lh.lateralorbitofrontal\_6)(lh.parstriangularis\_3)(lh.rostralmiddlefrontal\_12)  
6065 0.82609 (Left-Caudate)(Left-Putamen)(lh.parstriangularis\_3)(lh.rostralanteriorcingulate\_1)(lh.rostralmiddlefrontal\_4)  
6066 0.82609 (Left-Caudate)(Left-Putamen)(lh.posteriorcingulate\_2)  
6067 0.82609 (Left-Caudate)(Left-Putamen)(lh.rostralmiddlefrontal\_1)(lh.superiorfrontal\_4)  
6068 0.82609 (Left-Caudate)(Left-Thalamus-Proper)(lh.caudalmiddlefrontal\_4)  
6069 0.82609 (Left-Caudate)(lh.caudalmiddlefrontal\_3)(lh.caudalmiddlefrontal\_6)  
6070 0.82609 (Left-Caudate)(lh.caudalmiddlefrontal\_6)(lh.posteriorcingulate\_1)  
6071 0.82609 (Left-Caudate)(lh.insula\_6)(lh.rostralmiddlefrontal\_4)(lh.rostralmiddlefrontal\_9)  
6072 0.82609 (Left-Caudate)(lh.postcentral\_8)(lh.precentral\_11)(lh.precentral\_7)  
6073 0.82609 (Left-Caudate)(lh.rostralanteriorcingulate\_1)(lh.rostralanteriorcingulate\_2)(lh.rostralmiddlefrontal\_9)(lh.superiorfrontal\_4)  
6074 0.82609 (Left-Caudate)(lh.rostralanteriorcingulate\_1)(lh.rostralmiddlefrontal\_12)(lh.superiorfrontal\_4)  
6075 0.82609 (Left-Caudate)(lh.rostralmiddlefrontal\_4)(lh.rostralmiddlefrontal\_8)(lh.superiorfrontal\_4)  
6076 0.82609 (Left-Caudate)(lh.superiorfrontal\_11)(lh.superiorfrontal\_14)(lh.superiorfrontal\_4)(lh.superiorfrontal\_8)  
6077 0.82609 (Left-Hippocampus)(Left-Putamen)(Left-Thalamus-Proper)(lh.transversetemporal\_2)  
6078 0.82609 (Left-Hippocampus)(Left-Putamen)(lh.insula\_1)(lh.supramarginal\_1)  
6079 0.82609 (Left-Putamen)(lh.caudalanteriorcingulate\_2)(lh.posteriorcingulate\_3)(lh.superiorfrontal\_14)  
6080 0.82609 (Left-Putamen)(lh.caudalmiddlefrontal\_3)(lh.insula\_6)(lh.parstriangularis\_3)(lh.rostralmiddlefrontal\_1)  
6081 0.82609 (Left-Putamen)(lh.lateralorbitofrontal\_6)(lh.medialorbitofrontal\_2)(lh.rostralmiddlefrontal\_9)  
6082 0.82609 (Left-Putamen)(lh.posteriorcingulate\_2)  
6083 0.82609 (Left-Putamen)(lh.precentral\_11)(lh.precentral\_4)(lh.precentral\_9)  
6084 0.82609 (Left-Putamen)(lh.precentral\_4)(lh.superiorfrontal\_12)  
6085 0.82609 (Left-Putamen)(lh.precentral\_5)(lh.precentral\_7)  
6086 0.82609 (Left-Thalamus-Proper)(lh.caudalmiddlefrontal\_4)  
6087 0.82609 (lh.caudalanteriorcingulate\_2)(lh.superiorfrontal\_11)(lh.superiorfrontal\_14)(lh.superiorfrontal\_4)  
6088 0.82609 (lh.caudalmiddlefrontal\_3)(lh.caudalmiddlefrontal\_6)  
6089 0.82609 (lh.caudalmiddlefrontal\_3)(lh.parsopercularis\_1)(lh.rostralmiddlefrontal\_1)  
6090 0.82609 (lh.caudalmiddlefrontal\_3)(lh.parstriangularis\_3)(lh.rostralmiddlefrontal\_1)(lh.rostralmiddlefrontal\_4)  
6091 0.82609 (lh.caudalmiddlefrontal\_6)(lh.posteriorcingulate\_1)  
6092 0.82609 (lh.cuneus\_1)(lh.lateraloccipital\_2)(lh.pericalcarine\_1)  
6093 0.82609 (lh.fusiform\_1)(lh.fusiform\_5)(lh.inferiortemporal\_8)(lh.lateraloccipital\_9)  
6094 0.82609 (lh.inferiorparietal\_1)(lh.inferiorparietal\_4)(lh.lateraloccipital\_7)  
6095 0.82609 (lh.inferiorparietal\_10)(lh.supramarginal\_10)  
6096 0.82609 (lh.inferiortemporal\_2)(lh.middletemporal\_4)  
6097 0.82609 (lh.inferiortemporal\_5)(lh.inferiortemporal\_6)(lh.middletemporal\_3)  
6098 0.82609 (lh.lateraloccipital\_2)(lh.pericalcarine\_2)(lh.superiorparietal\_12)  
6099 0.82609 (lh.lateraloccipital\_6)(lh.lingual\_3)(lh.pericalcarine\_3)  
6100 0.82609 (lh.lateralorbitofrontal\_3)(lh.lateralorbitofrontal\_7)

6101 0.82609 (lh.lateralorbitofrontal\_4)(lh.parsorbitalis\_1)  
6102 0.82609 (lh.lateralorbitofrontal\_6)(lh.rostralmiddlefrontal\_10)(lh.rostralmiddlefrontal\_6)  
6103 0.82609 (lh.lateralorbitofrontal\_7)(lh.parstriangularis\_3)(lh.rostralmiddlefrontal\_12)(lh.rostralmiddlefrontal\_6)(lh.rostralmiddlefrontal\_9)  
6104 0.82609 (lh.lingual\_4)(lh.lingual\_6)  
6105 0.82609 (lh.paracentral\_5)(lh.superiorfrontal\_12)(lh.superiorfrontal\_8)  
6106 0.82609 (lh.parsorbitalis\_1)(lh.rostralmiddlefrontal\_12)  
6107 0.82609 (lh.rostralanteriorcingulate\_1)(lh.superiorfrontal\_2)(lh.superiorfrontal\_3)  
6108 0.82609 (lh.rostralanteriorcingulate\_2)(lh.rostralmiddlefrontal\_4)(lh.rostralmiddlefrontal\_9)(lh.superiorfrontal\_4)  
6109 0.82609 (lh.rostralanteriorcingulate\_2)(lh.rostralmiddlefrontal\_4)(lh.superiorfrontal\_10)(lh.superiorfrontal\_4)  
6110 0.82609 (lh.rostralmiddlefrontal\_12)(lh.rostralmiddlefrontal\_8)  
6111 0.82609 (lh.superiorfrontal\_10)(lh.superiorfrontal\_12)(lh.superiorfrontal\_8)  
6112 0.82609 (lh.superiorfrontal\_10)(lh.superiorfrontal\_14)(lh.superiorfrontal\_8)(lh.superiorfrontal\_9)  
6113 0.82609 (lh.superiorfrontal\_10)(lh.superiorfrontal\_4)(lh.superiorfrontal\_8)(lh.superiorfrontal\_9)  
6114 0.82609 (rh.bankssts\_1)(rh.inferiortemporal\_5)(rh.middletemporal\_4)  
6115 0.82609 (rh.bankssts\_2)(rh.inferiortemporal\_5)  
6116 0.82609 (rh.caudalanteriorcingulate\_1)(rh.rostralanteriorcingulate\_1)  
6117 0.82609 (rh.caudalanteriorcingulate\_2)(rh.parsopercularis\_4)  
6118 0.82609 (rh.caudalmiddlefrontal\_1)(rh.superiorfrontal\_13)  
6119 0.82609 (rh.cuneus\_3)(rh.cuneus\_4)  
6120 0.82609 (rh.cuneus\_3)(rh.pericalcarine\_2)(rh.superiorparietal\_11)  
6121 0.82609 (rh.fusiform\_2)(rh.fusiform\_4)(rh.lateraloccipital\_10)  
6122 0.82609 (rh.fusiform\_2)(rh.inferiorparietal\_10)(rh.lingual\_5)  
6123 0.82609 (rh.fusiform\_2)(rh.lateraloccipital\_10)(rh.lateraloccipital\_8)(rh.lingual\_5)  
6124 0.82609 (rh.fusiform\_8)(rh.superiortemporal\_3)  
6125 0.82609 (rh.insula\_1)(rh.supramarginal\_7)(rh.supramarginal\_8)  
6126 0.82609 (rh.lateraloccipital\_2)(rh.lateraloccipital\_4)  
6127 0.82609 (rh.lateralorbitofrontal\_6)(rh.parstriangularis\_1)(rh.parstriangularis\_3)(rh.rostralmiddlefrontal\_12)  
6128 0.82609 (rh.lateralorbitofrontal\_6)(rh.parstriangularis\_1)(rh.parstriangularis\_4)(rh.rostralmiddlefrontal\_8)  
6129 0.82609 (rh.lateralorbitofrontal\_6)(rh.parstriangularis\_4)(rh.rostralmiddlefrontal\_12)(rh.rostralmiddlefrontal\_8)  
6130 0.82609 (rh.lateralorbitofrontal\_7)(rh.parstriangularis\_1)(rh.parstriangularis\_4)  
6131 0.82609 (rh.medialorbitofrontal\_2)(rh.rostralmiddlefrontal\_11)(rh.rostralmiddlefrontal\_12)(rh.superiorfrontal\_2)  
6132 0.82609 (rh.parsopercularis\_1)(rh.parsopercularis\_2)(rh.parsopercularis\_4)  
6133 0.82609 (rh.parsorbitalis\_2)(rh.parstriangularis\_4)  
6134 0.82609 (rh.parsorbitalis\_2)(rh.rostralmiddlefrontal\_12)(rh.rostralmiddlefrontal\_13)  
6135 0.82609 (rh.parstriangularis\_1)(rh.rostralmiddlefrontal\_12)(rh.rostralmiddlefrontal\_5)  
6136 0.82609 (rh.parstriangularis\_2)(rh.rostralmiddlefrontal\_3)(rh.rostralmiddlefrontal\_8)  
6137 0.82609 (rh.postcentral\_1)(rh.postcentral\_2)(rh.postcentral\_4)  
6138 0.82609 (rh.postcentral\_1)(rh.postcentral\_4)(rh.precentral\_6)  
6139 0.82609 (rh.postcentral\_1)(rh.precentral\_1)(rh.precentral\_4)  
6140 0.82609 (rh.precuneus\_10)(rh.superiorparietal\_1)(rh.supramarginal\_9)  
6141 0.82609 (rh.rostralmiddlefrontal\_10)(rh.rostralmiddlefrontal\_11)(rh.rostralmiddlefrontal\_8)  
6142 0.82609 (rh.rostralmiddlefrontal\_10)(rh.rostralmiddlefrontal\_12)(rh.rostralmiddlefrontal\_8)  
6143 0.82609 (rh.superiorfrontal\_12)(rh.superiorfrontal\_14)  
6144 0.82609 (rh.superiorfrontal\_2)(rh.superiorfrontal\_6)(rh.superiorfrontal\_7)(rh.superiorfrontal\_9)  
6145 0.82609 (rh.superiorfrontal\_2)(rh.superiorfrontal\_7)(rh.superiorfrontal\_8)(rh.superiorfrontal\_9)  
6146 0.82609 (rh.superiorfrontal\_4)(rh.superiorfrontal\_6)(rh.superiorfrontal\_8)  
6147 0.82609 (Right-Caudate)(rh.caudalanteriorcingulate\_1)(rh.rostralanteriorcingulate\_1)  
6148 0.82609 (Right-Caudate)(rh.rostralmiddlefrontal\_12)(rh.superiorfrontal\_2)  
6149 0.82609 (Right-Caudate)(rh.superiorfrontal\_5)(rh.superiorfrontal\_7)(rh.superiorfrontal\_9)  
6150 0.82609 (Right-Caudate)(Right-Pallidum)(rh.precentral\_13)(rh.precentral\_7)

6151 0.82609 (Right-Caudate)(Right-Pallidum)(Right-Putamen)(rh.precentral\_13)(rh.precentral\_7)  
6152 0.82609 (Right-Caudate)(Right-Putamen)(rh.lateralorbitofrontal\_7)(rh.rostralmiddlefrontal\_8)  
6153 0.82609 (Right-Hippocampus)(rh.bankssts\_2)(rh.middletemporal\_1)  
6154 0.82609 (Right-Hippocampus)(rh.inferiorparietal\_1)(rh.inferiorparietal\_4)  
6155 0.82609 (Right-Putamen)(rh.lateralorbitofrontal\_6)(rh.lateralorbitofrontal\_7)(rh.rostralmiddlefrontal\_12)(rh.rostralmiddlefrontal\_13)  
6156 0.82609 (Right-Putamen)(rh.lateralorbitofrontal\_7)(rh.rostralmiddlefrontal\_11)(rh.superiorfrontal\_2)  
6157 0.82609 (Right-Putamen)(rh.paracentral\_4)  
6158 0.82609 (Right-Putamen)(rh.postcentral\_1)(rh.precentral\_6)(rh.precentral\_7)  
6159 0.82609 (Right-Putamen)(rh.posteriorcingulate\_2)(rh.superiorfrontal\_11)  
6160 0.82609 (Right-Putamen)(rh.rostralmiddlefrontal\_1)(rh.rostralmiddlefrontal\_3)  
6161 0.82367 (Left-Caudate)(Left-Putamen)(Left-Thalamus-Proper)(lh.caudalmiddlefrontal\_4)  
6162 0.82367 (Left-Caudate)(Left-Putamen)(lh.caudalanteriorcingulate\_1)(lh.caudalanteriorcingulate\_2)(lh.posteriorcingulate\_1)  
6163 0.82367 (Left-Caudate)(Left-Putamen)(lh.medialorbitofrontal\_2)(lh.parstriangularis\_3)(lh.rostralmiddlefrontal\_9)  
6164 0.82367 (Left-Caudate)(Left-Putamen)(lh.parstriangularis\_3)(lh.rostralanteriorcingulate\_1)(lh.rostralmiddlefrontal\_1)  
6165 0.82367 (Left-Caudate)(Left-Putamen)(lh.postcentral\_8)(lh.precentral\_11)(lh.precentral\_4)  
6166 0.82367 (Left-Caudate)(Left-Thalamus-Proper)(lh.posteriorcingulate\_3)(lh.precentral\_11)  
6167 0.82367 (Left-Caudate)(lh.caudalanteriorcingulate\_2)(lh.superiorfrontal\_14)(lh.superiorfrontal\_4)  
6168 0.82367 (Left-Caudate)(lh.insula\_6)(lh.lateralorbitofrontal\_6)  
6169 0.82367 (Left-Caudate)(lh.lateralorbitofrontal\_3)(lh.lateralorbitofrontal\_4)  
6170 0.82367 (Left-Caudate)(lh.lateralorbitofrontal\_6)(lh.lateralorbitofrontal\_7)(lh.parstriangularis\_3)(lh.rostralmiddlefrontal\_12)  
6171 0.82367 (Left-Caudate)(lh.lateralorbitofrontal\_7)(lh.medialorbitofrontal\_2)(lh.rostralanteriorcingulate\_1)(lh.rostralmiddlefrontal\_12)(lh.rostralmiddlefrontal\_9)  
6172 0.82367 (Left-Caudate)(lh.posteriorcingulate\_3)(lh.superiorfrontal\_8)  
6173 0.82367 (Left-Caudate)(lh.rostralmiddlefrontal\_12)(lh.rostralmiddlefrontal\_9)(lh.superiorfrontal\_3)  
6174 0.82367 (Left-Caudate)(lh.superiorfrontal\_12)(lh.superiorfrontal\_4)(lh.superiorfrontal\_8)  
6175 0.82367 (Left-Hippocampus)(lh.lingual\_6)(lh.parahippocampal\_3)  
6176 0.82367 (Left-Hippocampus)(lh.lingual\_8)(lh.precuneus\_11)  
6177 0.82367 (Left-Hippocampus)(lh.precuneus\_6)  
6178 0.82367 (Left-Putamen)(Left-Thalamus-Proper)(lh.caudalmiddlefrontal\_4)  
6179 0.82367 (Left-Putamen)(Left-Thalamus-Proper)(lh.precentral\_7)(lh.precentral\_9)  
6180 0.82367 (Left-Putamen)(lh.caudalanteriorcingulate\_1)(lh.caudalanteriorcingulate\_2)(lh.posteriorcingulate\_1)  
6181 0.82367 (Left-Putamen)(lh.insula\_6)(lh.lateralorbitofrontal\_6)(lh.rostralmiddlefrontal\_1)  
6182 0.82367 (Left-Putamen)(lh.lateralorbitofrontal\_2)(lh.rostralanteriorcingulate\_1)  
6183 0.82367 (Left-Putamen)(lh.lateralorbitofrontal\_6)(lh.rostralmiddlefrontal\_1)(lh.rostralmiddlefrontal\_12)(lh.rostralmiddlefrontal\_9)  
6184 0.82367 (Left-Putamen)(lh.lateralorbitofrontal\_7)(lh.superiorfrontal\_3)  
6185 0.82367 (Left-Putamen)(lh.precentral\_12)(lh.precentral\_16)  
6186 0.82367 (Left-Putamen)(lh.rostralanteriorcingulate\_2)(lh.rostralmiddlefrontal\_9)(lh.superiorfrontal\_4)  
6187 0.82367 (Left-Putamen)(lh.rostralmiddlefrontal\_8)(lh.superiorfrontal\_3)(lh.superiorfrontal\_4)  
6188 0.82367 (Left-Thalamus-Proper)(lh.posteriorcingulate\_3)(lh.precentral\_11)  
6189 0.82367 (lh.caudalanteriorcingulate\_2)(lh.caudalmiddlefrontal\_1)(lh.superiorfrontal\_11)  
6190 0.82367 (lh.caudalmiddlefrontal\_5)(lh.caudalmiddlefrontal\_6)(lh.superiorfrontal\_12)  
6191 0.82367 (lh.caudalmiddlefrontal\_6)(lh.precentral\_11)(lh.precentral\_13)  
6192 0.82367 (lh.cuneus\_1)(lh.superiorparietal\_12)(lh.superiorparietal\_14)  
6193 0.82367 (lh.cuneus\_2)(lh.pericalcarine\_3)  
6194 0.82367 (lh.fusiform\_5)(lh.fusiform\_6)(lh.inferiortemporal\_8)  
6195 0.82367 (lh.fusiform\_7)(lh.inferiortemporal\_2)(lh.inferiortemporal\_3)  
6196 0.82367 (lh.lateralorbitofrontal\_2)(lh.rostralanteriorcingulate\_1)  
6197 0.82367 (lh.lateralorbitofrontal\_4)(lh.lateralorbitofrontal\_6)(lh.parstriangularis\_3)(lh.rostralmiddlefrontal\_6)  
6198 0.82367 (lh.lateralorbitofrontal\_4)(lh.lateralorbitofrontal\_6)(lh.rostralmiddlefrontal\_6)(lh.rostralmiddlefrontal\_9)  
6199 0.82367 (lh.lateralorbitofrontal\_4)(lh.medialorbitofrontal\_2)(lh.rostralmiddlefrontal\_12)  
6200 0.82367 (lh.lateralorbitofrontal\_5)(lh.parstriangularis\_3)

6201 0.82367 (lh.lateralorbitofrontal\_7)(lh.medialorbitofrontal\_2)(lh.parstriangularis\_3)(lh.rostralanteriorcingulate\_1)  
6202 0.82367 (lh.lateralorbitofrontal\_7)(lh.parstriangularis\_3)(lh.rostralmiddlefrontal\_1)(lh.rostralmiddlefrontal\_9)  
6203 0.82367 (lh.lingual\_1)(lh.lingual\_4)(lh.lingual\_8)(lh.pericalcarine\_3)  
6204 0.82367 (lh.lingual\_5)(lh.pericalcarine\_3)  
6205 0.82367 (lh.medialorbitofrontal\_2)(lh.parstriangularis\_3)(lh.rostralanteriorcingulate\_1)(lh.rostralmiddlefrontal\_12)(lh.rostralmiddlefrontal\_9)  
6206 0.82367 (lh.paracentral\_1)(lh.paracentral\_4)(lh.paracentral\_5)(lh.precentral\_2)  
6207 0.82367 (lh.pericalcarine\_3)(lh.superiorparietal\_11)  
6208 0.82367 (lh.posteriorcingulate\_3)(lh.precentral\_11)(lh.precentral\_4)  
6209 0.82367 (lh.precuneus\_2)(lh.precuneus\_3)(lh.precuneus\_6)  
6210 0.82367 (lh.precuneus\_8)(lh.precuneus\_9)(lh.superiorparietal\_6)  
6211 0.82367 (lh.rostralanteriorcingulate\_1)(lh.rostralanteriorcingulate\_2)(lh.rostralmiddlefrontal\_4)(lh.rostralmiddlefrontal\_9)  
6212 0.82367 (lh.rostralanteriorcingulate\_1)(lh.rostralmiddlefrontal\_4)(lh.superiorfrontal\_3)(lh.superiorfrontal\_4)  
6213 0.82367 (lh.superiorfrontal\_10)(lh.superiorfrontal\_4)(lh.superiorfrontal\_7)(lh.superiorfrontal\_8)(lh.superiorfrontal\_9)  
6214 0.82367 (rh.fusiform\_1)(rh.fusiform\_2)(rh.fusiform\_3)(rh.lateraloccipital\_10)(rh.lateraloccipital\_8)  
6215 0.82367 (rh.fusiform\_1)(rh.lateraloccipital\_5)(rh.lateraloccipital\_8)  
6216 0.82367 (rh.fusiform\_1)(rh.lateraloccipital\_8)(rh.lingual\_2)(rh.pericalcarine\_1)  
6217 0.82367 (rh.fusiform\_8)(rh.inferiortemporal\_1)(rh.inferiortemporal\_2)  
6218 0.82367 (rh.inferiorparietal\_1)(rh.superiorparietal\_10)(rh.superiorparietal\_7)  
6219 0.82367 (rh.inferiortemporal\_2)(rh.inferiortemporal\_3)(rh.inferiortemporal\_4)  
6220 0.82367 (rh.insula\_3)(rh.precentral\_6)(rh.precentral\_7)  
6221 0.82367 (rh.lateraloccipital\_4)(rh.lateraloccipital\_5)(rh.pericalcarine\_4)  
6222 0.82367 (rh.lateraloccipital\_4)(rh.pericalcarine\_3)(rh.superiorparietal\_11)  
6223 0.82367 (rh.lateralorbitofrontal\_6)(rh.rostralmiddlefrontal\_12)(rh.rostralmiddlefrontal\_3)  
6224 0.82367 (rh.parstriangularis\_1)(rh.parstriangularis\_4)(rh.rostralmiddlefrontal\_12)(rh.rostralmiddlefrontal\_3)(rh.rostralmiddlefrontal\_8)  
6225 0.82367 (rh.parstriangularis\_1)(rh.rostralmiddlefrontal\_12)(rh.rostralmiddlefrontal\_5)(rh.rostralmiddlefrontal\_8)  
6226 0.82367 (rh.pericalcarine\_2)(rh.pericalcarine\_3)  
6227 0.82367 (rh.precentral\_10)(rh.precentral\_6)(rh.precentral\_8)  
6228 0.82367 (rh.precuneus\_4)(rh.precuneus\_5)(rh.precuneus\_8)  
6229 0.82367 (rh.rostralmiddlefrontal\_10)(rh.rostralmiddlefrontal\_12)(rh.superiorfrontal\_2)  
6230 0.82367 (rh.superiorfrontal\_1)(rh.superiorfrontal\_2)(rh.superiorfrontal\_3)  
6231 0.82367 (rh.superiorfrontal\_4)(rh.superiorfrontal\_5)(rh.superiorfrontal\_6)(rh.superiorfrontal\_8)  
6232 0.82367 (rh.superiorparietal\_11)(rh.superiorparietal\_7)  
6233 0.82367 (Right-Accumbens-area)(rh.lateralorbitofrontal\_4)  
6234 0.82367 (Right-Caudate)(rh.caudalmiddlefrontal\_4)(rh.superiorfrontal\_11)(rh.superiorfrontal\_9)  
6235 0.82367 (Right-Caudate)(rh.insula\_1)(rh.supramarginal\_8)(rh.supramarginal\_9)  
6236 0.82367 (Right-Caudate)(rh.rostralmiddlefrontal\_5)(rh.superiorfrontal\_2)  
6237 0.82367 (Right-Caudate)(Right-Putamen)(rh.parsopercularis\_2)  
6238 0.82367 (Right-Caudate)(Right-Putamen)(rh.rostralmiddlefrontal\_3)(rh.rostralmiddlefrontal\_8)  
6239 0.82367 (Right-Caudate)(Right-Putamen)(rh.supramarginal\_8)(rh.supramarginal\_9)  
6240 0.82367 (Right-Hippocampus)(rh.superiortemporal\_3)(rh.transversetemporal\_1)  
6241 0.82367 (Right-Putamen)(rh.caudalmiddlefrontal\_3)(rh.caudalmiddlefrontal\_4)  
6242 0.82367 (Right-Putamen)(rh.lateralorbitofrontal\_7)(rh.medialorbitofrontal\_2)(rh.rostralmiddlefrontal\_12)(rh.superiorfrontal\_2)  
6243 0.82367 (Right-Putamen)(rh.precentral\_5)(rh.precentral\_6)(rh.precentral\_7)  
6244 0.82367 (Right-Putamen)(rh.rostralmiddlefrontal\_11)(rh.rostralmiddlefrontal\_8)(rh.superiorfrontal\_2)  
6245 0.82367 (Right-Putamen)(Right-Thalamus-Proper)(rh.precentral\_7)  
6246 0.82367 (Right-Thalamus-Proper)(rh.precentral\_7)  
6247 0.82126 (Left-Caudate)(Left-Putamen)(lh.caudalanteriorcingulate\_2)(lh.posteriorcingulate\_3)(lh.superiorfrontal\_14)  
6248 0.82126 (Left-Caudate)(Left-Putamen)(lh.lateralorbitofrontal\_6)(lh.parstriangularis\_3)(lh.rostralmiddlefrontal\_1)  
6249 0.82126 (Left-Caudate)(Left-Putamen)(lh.lateralorbitofrontal\_7)(lh.medialorbitofrontal\_2)(lh.parstriangularis\_3)  
6250 0.82126 (Left-Caudate)(Left-Putamen)(lh.lateralorbitofrontal\_7)(lh.parstriangularis\_3)(lh.rostralanteriorcingulate\_1)(lh.rostralmiddlefrontal\_9)

6251 0.82126 (Left-Caudate)(Left-Putamen)(lh.rostralmiddlefrontal\_4)(lh.rostralmiddlefrontal\_8)  
6252 0.82126 (Left-Caudate)(Left-Putamen)(lh.superiorfrontal\_10)(lh.superiorfrontal\_11)(lh.superiorfrontal\_4)  
6253 0.82126 (Left-Caudate)(Left-Putamen)(lh.superiorfrontal\_14)(lh.superiorfrontal\_4)  
6254 0.82126 (Left-Caudate)(Left-Thalamus-Proper)(lh.postcentral\_8)(lh.precentral\_11)  
6255 0.82126 (Left-Caudate)(lh.caudalmiddlefrontal\_1)(lh.caudalmiddlefrontal\_6)  
6256 0.82126 (Left-Caudate)(lh.lateralorbitofrontal\_4)(lh.lateralorbitofrontal\_6)(lh.parstriangularis\_3)(lh.rostralmiddlefrontal\_9)  
6257 0.82126 (Left-Caudate)(lh.parstriangularis\_3)(lh.rostralmiddlefrontal\_1)(lh.rostralmiddlefrontal\_12)  
6258 0.82126 (Left-Caudate)(lh.rostralanteriorcingulate\_1)(lh.rostralmiddlefrontal\_4)(lh.rostralmiddlefrontal\_9)(lh.superiorfrontal\_4)  
6259 0.82126 (Left-Caudate)(lh.rostralanteriorcingulate\_2)(lh.rostralmiddlefrontal\_4)(lh.superiorfrontal\_10)  
6260 0.82126 (Left-Caudate)(lh.rostralanteriorcingulate\_2)(lh.rostralmiddlefrontal\_4)(lh.superiorfrontal\_11)  
6261 0.82126 (Left-Caudate)(lh.rostralanteriorcingulate\_2)(lh.rostralmiddlefrontal\_8)(lh.superiorfrontal\_4)  
6262 0.82126 (Left-Hippocampus)(lh.fusiform\_5)(lh.inferiorparietal\_4)  
6263 0.82126 (Left-Hippocampus)(lh.inferiorparietal\_4)(lh.lingual\_8)  
6264 0.82126 (Left-Hippocampus)(lh.temporalpole\_1)  
6265 0.82126 (Left-Pallidum)(lh.posteriorcingulate\_3)(lh.precentral\_4)  
6266 0.82126 (Left-Putamen)(lh.lateralorbitofrontal\_3)(lh.lateralorbitofrontal\_7)  
6267 0.82126 (Left-Putamen)(lh.lateralorbitofrontal\_4)(lh.medialorbitofrontal\_2)(lh.rostralmiddlefrontal\_9)  
6268 0.82126 (Left-Putamen)(lh.lateralorbitofrontal\_4)(lh.rostralmiddlefrontal\_1)  
6269 0.82126 (Left-Putamen)(lh.lateralorbitofrontal\_7)(lh.medialorbitofrontal\_2)(lh.parstriangularis\_3)(lh.rostralmiddlefrontal\_12)(lh.rostralmiddlefrontal\_9)  
6270 0.82126 (Left-Putamen)(lh.parstriangularis\_3)(lh.rostralanteriorcingulate\_2)(lh.rostralmiddlefrontal\_9)  
6271 0.82126 (Left-Putamen)(lh.rostralanteriorcingulate\_2)(lh.superiorfrontal\_10)  
6272 0.82126 (Left-Putamen)(lh.rostralmiddlefrontal\_1)(lh.rostralmiddlefrontal\_3)(lh.rostralmiddlefrontal\_4)  
6273 0.82126 (Left-Thalamus-Proper)(lh.paracentral\_5)(lh.posteriorcingulate\_3)  
6274 0.82126 (lh.bankssts\_1)(lh.superiortemporal\_2)  
6275 0.82126 (lh.bankssts\_3)(lh.fusiform\_4)(lh.fusiform\_5)  
6276 0.82126 (lh.caudalanteriorcingulate\_2)(lh.superiorfrontal\_10)(lh.superiorfrontal\_11)(lh.superiorfrontal\_14)  
6277 0.82126 (lh.caudalanteriorcingulate\_2)(lh.superiorfrontal\_11)(lh.superiorfrontal\_14)(lh.superiorfrontal\_4)(lh.superiorfrontal\_8)  
6278 0.82126 (lh.fusiform\_7)(lh.inferiortemporal\_6)(lh.inferiortemporal\_7)  
6279 0.82126 (lh.inferiorparietal\_1)(lh.inferiorparietal\_6)(lh.inferiorparietal\_8)  
6280 0.82126 (lh.inferiortemporal\_3)(lh.inferiortemporal\_4)(lh.middletemporal\_4)  
6281 0.82126 (lh.inferiortemporal\_5)(lh.middletemporal\_4)  
6282 0.82126 (lh.insula\_6)(lh.parstriangularis\_3)(lh.rostralmiddlefrontal\_4)(lh.rostralmiddlefrontal\_9)  
6283 0.82126 (lh.lateraloccipital\_1)(lh.pericalcarine\_1)(lh.superiorparietal\_14)  
6284 0.82126 (lh.lateraloccipital\_11)(lh.lateraloccipital\_3)(lh.pericalcarine\_3)  
6285 0.82126 (lh.lateraloccipital\_6)(lh.lateraloccipital\_7)(lh.lingual\_1)(lh.pericalcarine\_3)  
6286 0.82126 (lh.lateraloccipital\_6)(lh.lingual\_6)(lh.pericalcarine\_3)  
6287 0.82126 (lh.lateraloccipital\_6)(lh.precuneus\_11)  
6288 0.82126 (lh.lateraloccipital\_7)(lh.lingual\_6)(lh.lingual\_8)  
6289 0.82126 (lh.lateralorbitofrontal\_4)(lh.lateralorbitofrontal\_5)(lh.lateralorbitofrontal\_6)  
6290 0.82126 (lh.lateralorbitofrontal\_4)(lh.lateralorbitofrontal\_7)(lh.medialorbitofrontal\_2)  
6291 0.82126 (lh.lateralorbitofrontal\_4)(lh.parstriangularis\_3)(lh.rostralanteriorcingulate\_1)(lh.rostralmiddlefrontal\_12)(lh.rostralmiddlefrontal\_9)  
6292 0.82126 (lh.lateralorbitofrontal\_4)(lh.parstriangularis\_3)(lh.rostralmiddlefrontal\_1)  
6293 0.82126 (lh.lateralorbitofrontal\_4)(lh.rostralmiddlefrontal\_1)(lh.rostralmiddlefrontal\_9)  
6294 0.82126 (lh.lateralorbitofrontal\_6)(lh.lateralorbitofrontal\_7)(lh.parstriangularis\_3)(lh.rostralmiddlefrontal\_1)  
6295 0.82126 (lh.lateralorbitofrontal\_6)(lh.rostralmiddlefrontal\_11)(lh.rostralmiddlefrontal\_6)  
6296 0.82126 (lh.lateralorbitofrontal\_7)(lh.medialorbitofrontal\_2)(lh.rostralanteriorcingulate\_1)(lh.superiorfrontal\_3)  
6297 0.82126 (lh.lateralorbitofrontal\_7)(lh.medialorbitofrontal\_2)(lh.rostralmiddlefrontal\_12)(lh.rostralmiddlefrontal\_9)(lh.superiorfrontal\_3)  
6298 0.82126 (lh.paracentral\_1)(lh.paracentral\_5)(lh.precentral\_3)  
6299 0.82126 (lh.paracentral\_5)(lh.postcentral\_3)(lh.precentral\_4)  
6300 0.82126 (lh.paracentral\_5)(lh.posteriorcingulate\_3)(lh.superiorfrontal\_14)

6301 0.82126 (lh.parsopercularis\_1)(lh.parstriangularis\_3)(lh.rostralmiddlefrontal\_9)  
6302 0.82126 (lh.parsopercularis\_1)(lh.rostralmiddlefrontal\_9)  
6303 0.82126 (lh.parstriangularis\_1)(lh.rostralmiddlefrontal\_6)  
6304 0.82126 (lh.parstriangularis\_3)(lh.rostralmiddlefrontal\_1)(lh.rostralmiddlefrontal\_12)(lh.rostralmiddlefrontal\_6)  
6305 0.82126 (lh.rostralanteriocingulate\_1)(lh.rostralmiddlefrontal\_1)(lh.rostralmiddlefrontal\_4)  
6306 0.82126 (lh.rostralanteriocingulate\_1)(lh.superiorfrontal\_1)(lh.superiorfrontal\_3)  
6307 0.82126 (lh.rostralanteriocingulate\_2)(lh.superiorfrontal\_3)  
6308 0.82126 (lh.rostralmiddlefrontal\_1)(lh.rostralmiddlefrontal\_4)(lh.rostralmiddlefrontal\_5)(lh.rostralmiddlefrontal\_9)  
6309 0.82126 (lh.superiorfrontal\_10)(lh.superiorfrontal\_11)(lh.superiorfrontal\_4)(lh.superiorfrontal\_6)(lh.superiorfrontal\_7)(lh.superiorfrontal\_8)  
6310 0.82126 (lh.superiorfrontal\_10)(lh.superiorfrontal\_11)(lh.superiorfrontal\_6)(lh.superiorfrontal\_7)(lh.superiorfrontal\_8)  
6311 0.82126 (lh.superiorfrontal\_13)(lh.superiorfrontal\_7)(lh.superiorfrontal\_8)  
6312 0.82126 (lh.superiortemporal\_2)(lh.supramarginal\_6)  
6313 0.82126 (rh.bankssts\_2)(rh.bankssts\_3)(rh.superiortemporal\_1)  
6314 0.82126 (rh.bankssts\_2)(rh.inferiorparietal\_4)(rh.superiortemporal\_1)  
6315 0.82126 (rh.caudalmiddlefrontal\_3)(rh.precentral\_9)  
6316 0.82126 (rh.caudalmiddlefrontal\_4)(rh.insula\_7)(rh.parsopercularis\_4)(rh.rostralmiddlefrontal\_3)  
6317 0.82126 (rh.caudalmiddlefrontal\_4)(rh.parsopercularis\_2)(rh.parsopercularis\_4)  
6318 0.82126 (rh.fusiform\_1)(rh.lingual\_7)(rh.pericalcarine\_1)  
6319 0.82126 (rh.fusiform\_2)(rh.lateraloccipital\_10)(rh.lingual\_5)(rh.lingual\_7)  
6320 0.82126 (rh.fusiform\_3)(rh.lateraloccipital\_10)(rh.middletemporal\_1)  
6321 0.82126 (rh.inferiorparietal\_1)(rh.inferiorparietal\_4)(rh.supramarginal\_8)  
6322 0.82126 (rh.inferiorparietal\_10)(rh.inferiorparietal\_11)(rh.lateraloccipital\_10)(rh.lateraloccipital\_8)  
6323 0.82126 (rh.inferiorparietal\_4)(rh.superiorparietal\_1)(rh.supramarginal\_9)  
6324 0.82126 (rh.inferiorparietal\_8)(rh.inferiorparietal\_9)  
6325 0.82126 (rh.inferiortemporal\_3)(rh.inferiortemporal\_5)(rh.middletemporal\_6)  
6326 0.82126 (rh.inferiortemporal\_5)(rh.middletemporal\_2)(rh.middletemporal\_6)  
6327 0.82126 (rh.inferiortemporal\_6)(rh.inferiortemporal\_7)(rh.middletemporal\_1)(rh.middletemporal\_2)  
6328 0.82126 (rh.lateraloccipital\_1)(rh.lateraloccipital\_3)(rh.lateraloccipital\_4)(rh.pericalcarine\_4)  
6329 0.82126 (rh.lateraloccipital\_1)(rh.lateraloccipital\_4)(rh.superiorparietal\_11)  
6330 0.82126 (rh.lateraloccipital\_10)(rh.lateraloccipital\_4)  
6331 0.82126 (rh.lateraloccipital\_4)(rh.lateraloccipital\_5)(rh.pericalcarine\_3)  
6332 0.82126 (rh.lateraloccipital\_4)(rh.lingual\_7)  
6333 0.82126 (rh.lateralorbitofrontal\_2)(rh.parstriangularis\_1)(rh.parstriangularis\_4)  
6334 0.82126 (rh.lateralorbitofrontal\_6)(rh.parstriangularis\_2)(rh.parstriangularis\_4)  
6335 0.82126 (rh.lateralorbitofrontal\_7)(rh.rostralmiddlefrontal\_11)(rh.rostralmiddlefrontal\_8)(rh.superiorfrontal\_2)  
6336 0.82126 (rh.paracentral\_4)(rh.precentral\_14)(rh.superiorfrontal\_17)  
6337 0.82126 (rh.parsopercularis\_2)(rh.parstriangularis\_2)(rh.rostralmiddlefrontal\_3)  
6338 0.82126 (rh.parsopercularis\_4)(rh.parstriangularis\_1)(rh.parstriangularis\_2)(rh.rostralmiddlefrontal\_3)  
6339 0.82126 (rh.parsorbitalis\_2)(rh.rostralmiddlefrontal\_12)(rh.rostralmiddlefrontal\_7)  
6340 0.82126 (rh.parstriangularis\_1)(rh.rostralmiddlefrontal\_3)(rh.rostralmiddlefrontal\_6)  
6341 0.82126 (rh.pericalcarine\_1)(rh.precuneus\_1)(rh.superiorparietal\_11)  
6342 0.82126 (rh.postcentral\_3)(rh.precentral\_4)  
6343 0.82126 (rh.precentral\_10)(rh.precentral\_5)  
6344 0.82126 (rh.precuneus\_4)(rh.precuneus\_7)(rh.superiorparietal\_7)(rh.superiorparietal\_8)  
6345 0.82126 (rh.rostralmiddlefrontal\_1)(rh.rostralmiddlefrontal\_2)(rh.rostralmiddlefrontal\_5)  
6346 0.82126 (rh.rostralmiddlefrontal\_4)(rh.rostralmiddlefrontal\_6)  
6347 0.82126 (rh.rostralmiddlefrontal\_5)(rh.rostralmiddlefrontal\_9)(rh.superiorfrontal\_2)  
6348 0.82126 (rh.superiorfrontal\_10)(rh.superiorfrontal\_11)(rh.superiorfrontal\_13)(rh.superiorfrontal\_8)(rh.superiorfrontal\_9)  
6349 0.82126 (rh.superiorfrontal\_11)(rh.superiorfrontal\_13)(rh.superiorfrontal\_5)(rh.superiorfrontal\_8)  
6350 0.82126 (rh.superiorfrontal\_2)(rh.superiorfrontal\_5)(rh.superiorfrontal\_6)(rh.superiorfrontal\_7)(rh.superiorfrontal\_9)

6351 0.82126 (rh.superiortemporal\_4)(rh.superiortemporal\_6)  
6352 0.82126 (Right-Amygdala)(rh.fusiform\_8)(rh.insula\_5)  
6353 0.82126 (Right-Caudate)(rh.caudalanteriorcingulate\_2)(rh.parsopercularis\_4)  
6354 0.82126 (Right-Caudate)(rh.caudalmiddlefrontal\_4)(rh.superiorfrontal\_11)(rh.superiorfrontal\_7)  
6355 0.82126 (Right-Caudate)(rh.insula\_7)(rh.rostralmiddlefrontal\_3)  
6356 0.82126 (Right-Caudate)(Right-Putamen)(rh.parstriangularis\_1)(rh.rostralmiddlefrontal\_3)  
6357 0.82126 (Right-Hippocampus)(Right-Putamen)(rh.superiorparietal\_1)(rh.supramarginal\_9)  
6358 0.82126 (Right-Putamen)(rh.caudalmiddlefrontal\_4)(rh.caudalmiddlefrontal\_5)(rh.superiorfrontal\_7)  
6359 0.82126 (Right-Putamen)(rh.caudalmiddlefrontal\_4)(rh.superiorfrontal\_11)(rh.superiorfrontal\_13)  
6360 0.82126 (Right-Putamen)(rh.lateralorbitofrontal\_7)(rh.rostralmiddlefrontal\_12)(rh.rostralmiddlefrontal\_8)(rh.superiorfrontal\_2)  
6361 0.81884 (Left-Accumbens-area)(Left-Amygdala)(Left-Hippocampus)(Left-Pallidum)(Left-Putamen)(Left-Thalamus-Proper)  
6362 0.81884 (Left-Accumbens-area)(Left-Amygdala)(Left-Hippocampus)(Left-Pallidum)(Left-Putamen)  
6363 0.81884 (Left-Accumbens-area)(lh.lateralorbitofrontal\_7)  
6364 0.81884 (Left-Caudate)(Left-Putamen)(Left-Thalamus-Proper)(lh.postcentral\_8)(lh.precentral\_11)  
6365 0.81884 (Left-Caudate)(Left-Putamen)(lh.insula\_6)(lh.lateralorbitofrontal\_6)  
6366 0.81884 (Left-Caudate)(Left-Putamen)(lh.medialorbitofrontal\_2)(lh.parstriangularis\_3)(lh.rostralanteriorcingulate\_1)  
6367 0.81884 (Left-Caudate)(Left-Putamen)(lh.precentral\_4)(lh.superiorfrontal\_12)  
6368 0.81884 (Left-Caudate)(lh.caudalmiddlefrontal\_4)(lh.caudalmiddlefrontal\_6)(lh.precentral\_11)(lh.precentral\_9)  
6369 0.81884 (Left-Caudate)(lh.lateralorbitofrontal\_2)(lh.lateralorbitofrontal\_7)(lh.medialorbitofrontal\_5)  
6370 0.81884 (Left-Caudate)(lh.posteriorcingulate\_3)(lh.precentral\_11)(lh.precentral\_4)  
6371 0.81884 (Left-Caudate)(lh.rostralmiddlefrontal\_1)(lh.superiorfrontal\_10)  
6372 0.81884 (Left-Hippocampus)(lh.insula\_2)(lh.insula\_4)  
6373 0.81884 (Left-Hippocampus)(lh.isthmuscingulate\_3)(lh.precuneus\_6)  
6374 0.81884 (Left-Putamen)(lh.lateralorbitofrontal\_2)(lh.medialorbitofrontal\_4)  
6375 0.81884 (Left-Putamen)(lh.lateralorbitofrontal\_4)(lh.lateralorbitofrontal\_7)(lh.medialorbitofrontal\_2)  
6376 0.81884 (Left-Putamen)(lh.medialorbitofrontal\_2)(lh.parstriangularis\_3)(lh.rostralanteriorcingulate\_1)(lh.rostralmiddlefrontal\_12)  
6377 0.81884 (Left-Putamen)(lh.posteriorcingulate\_3)(lh.precentral\_11)  
6378 0.81884 (Left-Putamen)(lh.precentral\_13)(lh.precentral\_14)  
6379 0.81884 (Left-Putamen)(lh.rostralanteriorcingulate\_2)(lh.superiorfrontal\_11)(lh.superiorfrontal\_4)  
6380 0.81884 (Left-Putamen)(lh.rostralmiddlefrontal\_12)(lh.rostralmiddlefrontal\_9)(lh.superiorfrontal\_4)  
6381 0.81884 (Left-Putamen)(lh.rostralmiddlefrontal\_4)(lh.superiorfrontal\_10)(lh.superiorfrontal\_4)  
6382 0.81884 (Left-Putamen)(lh.superiorfrontal\_12)(lh.superiorfrontal\_4)  
6383 0.81884 (lh.bankssts\_2)(lh.inferiortemporal\_7)(lh.inferiortemporal\_8)  
6384 0.81884 (lh.caudalanteriorcingulate\_1)(lh.superiorfrontal\_4)  
6385 0.81884 (lh.caudalmiddlefrontal\_3)(lh.insula\_6)(lh.parsopercularis\_1)  
6386 0.81884 (lh.caudalmiddlefrontal\_3)(lh.insula\_6)(lh.parsopercularis\_3)(lh.rostralmiddlefrontal\_1)  
6387 0.81884 (lh.caudalmiddlefrontal\_5)(lh.superiorfrontal\_11)  
6388 0.81884 (lh.fusiform\_1)(lh.fusiform\_2)(lh.lingual\_6)(lh.lingual\_8)  
6389 0.81884 (lh.fusiform\_2)(lh.lateraloccipital\_6)(lh.lingual\_1)(lh.lingual\_4)(lh.pericalcarine\_3)  
6390 0.81884 (lh.fusiform\_4)(lh.inferiortemporal\_7)(lh.inferiortemporal\_8)  
6391 0.81884 (lh.fusiform\_7)(lh.middletemporal\_3)(lh.middletemporal\_4)  
6392 0.81884 (lh.inferiorparietal\_1)(lh.lingual\_6)  
6393 0.81884 (lh.inferiorparietal\_5)(lh.inferiorparietal\_9)(lh.superiortemporal\_2)  
6394 0.81884 (lh.insula\_1)(lh.precentral\_11)(lh.supramarginal\_9)  
6395 0.81884 (lh.insula\_6)(lh.lateralorbitofrontal\_6)(lh.rostralmiddlefrontal\_9)  
6396 0.81884 (lh.lingual\_1)(lh.lingual\_3)(lh.pericalcarine\_2)(lh.pericalcarine\_3)  
6397 0.81884 (lh.paracentral\_5)(lh.precentral\_7)  
6398 0.81884 (lh.paracentral\_5)(lh.superiorfrontal\_12)(lh.superiorfrontal\_14)(lh.superiorfrontal\_8)  
6399 0.81884 (lh.parsopercularis\_2)(lh.parsopercularis\_3)(lh.rostralmiddlefrontal\_1)  
6400 0.81884 (lh.parstriangularis\_3)(lh.rostralanteriorcingulate\_1)(lh.rostralanteriorcingulate\_2)(lh.rostralmiddlefrontal\_9)



6401 0.81884 (lh.parstriangularis\_3)(lh.rostralmiddlefrontal\_1)(lh.rostralmiddlefrontal\_12)(lh.rostralmiddlefrontal\_6)(lh.rostralmiddlefrontal\_9)  
6402 0.81884 (lh.parstriangularis\_3)(lh.rostralmiddlefrontal\_4)(lh.rostralmiddlefrontal\_8)  
6403 0.81884 (lh.parstriangularis\_3)(lh.rostralmiddlefrontal\_7)  
6404 0.81884 (lh.precentral\_16)(lh.supramarginal\_1)  
6405 0.81884 (lh.precuneus\_10)(lh.precuneus\_6)(lh.precuneus\_8)(lh.superiorparietal\_11)  
6406 0.81884 (lh.rostralanteriocingulate\_1)(lh.rostralmiddlefrontal\_12)(lh.rostralmiddlefrontal\_4)  
6407 0.81884 (lh.rostralanteriocingulate\_2)(lh.rostralmiddlefrontal\_1)(lh.rostralmiddlefrontal\_9)  
6408 0.81884 (lh.rostralmiddlefrontal\_4)(lh.superiorfrontal\_10)(lh.superiorfrontal\_3)  
6409 0.81884 (lh.superiorfrontal\_10)(lh.superiorfrontal\_11)(lh.superiorfrontal\_12)  
6410 0.81884 (lh.superiorfrontal\_10)(lh.superiorfrontal\_11)(lh.superiorfrontal\_14)(lh.superiorfrontal\_7)  
6411 0.81884 (lh.superiorfrontal\_10)(lh.superiorfrontal\_11)(lh.superiorfrontal\_14)(lh.superiorfrontal\_9)  
6412 0.81884 (lh.superiorfrontal\_11)(lh.superiorfrontal\_14)(lh.superiorfrontal\_4)(lh.superiorfrontal\_9)  
6413 0.81884 (lh.superiortemporal\_6)(lh.transversetemporal\_1)  
6414 0.81884 (rh.fusiform\_6)(rh.lateraloccipital\_10)  
6415 0.81884 (rh.fusiform\_8)(rh.inferiortemporal\_2)(rh.middletemporal\_9)  
6416 0.81884 (rh.inferiorparietal\_12)(rh.inferiorparietal\_4)(rh.inferiorparietal\_8)  
6417 0.81884 (rh.inferiorparietal\_12)(rh.lateraloccipital\_4)(rh.lateraloccipital\_8)(rh.pericalcarine\_1)  
6418 0.81884 (rh.insula\_1)(rh.precentral\_13)  
6419 0.81884 (rh.lateraloccipital\_10)(rh.lateraloccipital\_4)(rh.lateraloccipital\_8)  
6420 0.81884 (rh.medialorbitofrontal\_1)(rh.medialorbitofrontal\_2)  
6421 0.81884 (rh.medialorbitofrontal\_2)(rh.rostralmiddlefrontal\_8)(rh.superiorfrontal\_2)  
6422 0.81884 (rh.parsorbitalis\_1)(rh.parstriangularis\_1)(rh.rostralmiddlefrontal\_12)  
6423 0.81884 (rh.parstriangularis\_1)(rh.superiorfrontal\_2)  
6424 0.81884 (rh.precentral\_11)(rh.superiorparietal\_1)(rh.supramarginal\_1)  
6425 0.81884 (rh.rostralmiddlefrontal\_1)(rh.rostralmiddlefrontal\_3)(rh.rostralmiddlefrontal\_5)(rh.rostralmiddlefrontal\_8)  
6426 0.81884 (rh.rostralmiddlefrontal\_10)(rh.rostralmiddlefrontal\_8)(rh.rostralmiddlefrontal\_9)  
6427 0.81884 (rh.rostralmiddlefrontal\_12)(rh.rostralmiddlefrontal\_3)(rh.rostralmiddlefrontal\_6)  
6428 0.81884 (rh.superiorfrontal\_2)(rh.superiorfrontal\_5)(rh.superiorfrontal\_7)(rh.superiorfrontal\_8)(rh.superiorfrontal\_9)  
6429 0.81884 (Right-Accumbens-area)(Right-Putamen)(rh.lateralorbitofrontal\_4)  
6430 0.81884 (Right-Amygdala)(rh.insula\_2)(rh.insula\_4)  
6431 0.81884 (Right-Amygdala)(Right-Putamen)(rh.insula\_2)(rh.insula\_4)  
6432 0.81884 (Right-Caudate)(rh.lateralorbitofrontal\_2)(rh.rostralmiddlefrontal\_8)  
6433 0.81884 (Right-Caudate)(rh.lateralorbitofrontal\_4)(rh.lateralorbitofrontal\_6)(rh.lateralorbitofrontal\_7)  
6434 0.81884 (Right-Caudate)(rh.lateralorbitofrontal\_6)(rh.lateralorbitofrontal\_7)(rh.rostralmiddlefrontal\_12)  
6435 0.81884 (Right-Caudate)(rh.superiorfrontal\_13)(rh.superiorfrontal\_14)  
6436 0.81884 (Right-Caudate)(Right-Putamen)(rh.lateralorbitofrontal\_2)(rh.rostralmiddlefrontal\_8)  
6437 0.81884 (Right-Caudate)(Right-Putamen)(rh.lateralorbitofrontal\_4)(rh.lateralorbitofrontal\_6)(rh.lateralorbitofrontal\_7)  
6438 0.81884 (Right-Caudate)(Right-Putamen)(rh.lateralorbitofrontal\_6)(rh.lateralorbitofrontal\_7)(rh.rostralmiddlefrontal\_12)  
6439 0.81884 (Right-Hippocampus)(rh.superiortemporal\_1)(rh.superiortemporal\_3)(rh.superiortemporal\_9)  
6440 0.81884 (Right-Putamen)(rh.insula\_1)(rh.precentral\_13)  
6441 0.81884 (Right-Putamen)(rh.lateralorbitofrontal\_5)(rh.lateralorbitofrontal\_6)(rh.lateralorbitofrontal\_7)  
6442 0.81884 (Right-Putamen)(rh.lateralorbitofrontal\_6)(rh.lateralorbitofrontal\_7)(rh.rostralmiddlefrontal\_12)(rh.rostralmiddlefrontal\_8)  
6443 0.81884 (Right-Putamen)(rh.lateralorbitofrontal\_7)(rh.rostralmiddlefrontal\_11)(rh.rostralmiddlefrontal\_12)  
6444 0.81884 (Right-Putamen)(rh.medialorbitofrontal\_2)(rh.rostralmiddlefrontal\_12)(rh.rostralmiddlefrontal\_13)  
6445 0.81884 (Right-Putamen)(rh.rostralanteriocingulate\_1)(rh.rostralmiddlefrontal\_8)  
6446 0.81643 (Left-Amygdala)(Left-Hippocampus)(lh.entorhinal\_1)(lh.insula\_4)  
6447 0.81643 (Left-Amygdala)(Left-Hippocampus)(lh.temporalpole\_1)  
6448 0.81643 (Left-Caudate)(Left-Putamen)(lh.insula\_6)(lh.rostralanteriocingulate\_2)  
6449 0.81643 (Left-Caudate)(Left-Putamen)(lh.insula\_6)(lh.rostralmiddlefrontal\_4)(lh.rostralmiddlefrontal\_9)  
6450 0.81643 (Left-Caudate)(Left-Putamen)(lh.lateralorbitofrontal\_6)(lh.parstriangularis\_3)(lh.rostralmiddlefrontal\_12)(lh.rostralmiddlefrontal\_9)

6451 0.81643 (Left-Caudate)(Left-Putamen)(lh.posteriorcingulate\_3)(lh.precentral\_11)  
6452 0.81643 (Left-Caudate)(lh.caudalanteriorcingulate\_1)(lh.rostralmiddlefrontal\_1)  
6453 0.81643 (Left-Caudate)(lh.caudalanteriorcingulate\_1)(lh.superiorfrontal\_8)  
6454 0.81643 (Left-Caudate)(lh.lateralorbitofrontal\_6)(lh.lateralorbitofrontal\_7)(lh.rostralmiddlefrontal\_12)(lh.rostralmiddlefrontal\_9)  
6455 0.81643 (Left-Caudate)(lh.postcentral\_3)(lh.posteriorcingulate\_4)  
6456 0.81643 (Left-Hippocampus)(lh.superiortemporal\_2)(lh.superiortemporal\_3)  
6457 0.81643 (Left-Pallidum)(lh.precentral\_11)(lh.precentral\_7)  
6458 0.81643 (Left-Putamen)(lh.caudalmiddlefrontal\_1)(lh.rostralmiddlefrontal\_1)(lh.rostralmiddlefrontal\_4)  
6459 0.81643 (Left-Putamen)(lh.insula\_1)(lh.supramarginal\_4)  
6460 0.81643 (Left-Putamen)(lh.lateralorbitofrontal\_4)(lh.medialorbitofrontal\_2)(lh.rostralmiddlefrontal\_12)  
6461 0.81643 (Left-Putamen)(lh.rostralanteriorcingulate\_2)(lh.rostralmiddlefrontal\_8)(lh.superiorfrontal\_4)  
6462 0.81643 (Left-Putamen)(lh.rostralmiddlefrontal\_1)(lh.rostralmiddlefrontal\_4)(lh.superiorfrontal\_4)  
6463 0.81643 (lh.caudalanteriorcingulate\_1)(lh.rostralmiddlefrontal\_1)  
6464 0.81643 (lh.caudalanteriorcingulate\_2)(lh.superiorfrontal\_10)(lh.superiorfrontal\_11)(lh.superiorfrontal\_14)(lh.superiorfrontal\_8)  
6465 0.81643 (lh.caudalmiddlefrontal\_3)(lh.caudalmiddlefrontal\_4)(lh.caudalmiddlefrontal\_6)  
6466 0.81643 (lh.fusiform\_1)(lh.fusiform\_4)(lh.lateraloccipital\_9)  
6467 0.81643 (lh.fusiform\_2)(lh.fusiform\_5)(lh.lateraloccipital\_9)(lh.lingual\_8)  
6468 0.81643 (lh.fusiform\_2)(lh.lateraloccipital\_11)(lh.pericalcarine\_2)  
6469 0.81643 (lh.inferiorparietal\_8)(lh.superiorparietal\_11)(lh.superiorparietal\_5)  
6470 0.81643 (lh.isthmuscingulate\_2)(lh.precuneus\_3)(lh.precuneus\_6)  
6471 0.81643 (lh.lateraloccipital\_11)(lh.lateraloccipital\_7)  
6472 0.81643 (lh.lateraloccipital\_7)(lh.lateraloccipital\_8)(lh.lateraloccipital\_9)  
6473 0.81643 (lh.lateralorbitofrontal\_4)(lh.lateralorbitofrontal\_7)(lh.parstriangularis\_3)(lh.rostralanteriorcingulate\_1)  
6474 0.81643 (lh.lateralorbitofrontal\_4)(lh.parstriangularis\_3)(lh.rostralmiddlefrontal\_6)(lh.rostralmiddlefrontal\_9)  
6475 0.81643 (lh.lateralorbitofrontal\_6)(lh.lateralorbitofrontal\_7)(lh.medialorbitofrontal\_2)(lh.rostralmiddlefrontal\_9)  
6476 0.81643 (lh.lateralorbitofrontal\_6)(lh.lateralorbitofrontal\_7)(lh.parstriangularis\_3)(lh.rostralmiddlefrontal\_12)(lh.rostralmiddlefrontal\_6)(lh.rostralmiddlefrontal\_9)  
6477 0.81643 (lh.lateralorbitofrontal\_7)(lh.rostralanteriorcingulate\_1)(lh.rostralmiddlefrontal\_12)(lh.superiorfrontal\_3)  
6478 0.81643 (lh.medialorbitofrontal\_2)(lh.superiorfrontal\_2)(lh.superiorfrontal\_3)  
6479 0.81643 (lh.medialorbitofrontal\_2)(lh.superiorfrontal\_2)  
6480 0.81643 (lh.paracentral\_3)(lh.superiorparietal\_1)  
6481 0.81643 (lh.paracentral\_5)(lh.precentral\_4)(lh.superiorfrontal\_15)  
6482 0.81643 (lh.paracentral\_5)(lh.superiorfrontal\_16)  
6483 0.81643 (lh.paracentral\_5)(lh.superiorfrontal\_17)  
6484 0.81643 (lh.parstriangularis\_3)(lh.rostralanteriorcingulate\_2)(lh.rostralmiddlefrontal\_1)  
6485 0.81643 (lh.postcentral\_3)(lh.supramarginal\_4)  
6486 0.81643 (lh.precuneus\_6)(lh.precuneus\_7)(lh.precuneus\_8)  
6487 0.81643 (lh.rostralanteriorcingulate\_1)(lh.rostralmiddlefrontal\_1)(lh.rostralmiddlefrontal\_4)(lh.rostralmiddlefrontal\_9)  
6488 0.81643 (lh.rostralanteriorcingulate\_1)(lh.rostralmiddlefrontal\_12)(lh.rostralmiddlefrontal\_9)(lh.superiorfrontal\_3)(lh.superiorfrontal\_4)  
6489 0.81643 (lh.rostralanteriorcingulate\_2)(lh.rostralmiddlefrontal\_4)(lh.superiorfrontal\_11)(lh.superiorfrontal\_4)  
6490 0.81643 (lh.rostralmiddlefrontal\_1)(lh.rostralmiddlefrontal\_4)(lh.rostralmiddlefrontal\_9)(lh.superiorfrontal\_4)  
6491 0.81643 (lh.rostralmiddlefrontal\_4)(lh.rostralmiddlefrontal\_8)(lh.rostralmiddlefrontal\_9)(lh.superiorfrontal\_3)  
6492 0.81643 (lh.superiorfrontal\_10)(lh.superiorfrontal\_11)(lh.superiorfrontal\_12)(lh.superiorfrontal\_8)  
6493 0.81643 (lh.superiorfrontal\_10)(lh.superiorfrontal\_11)(lh.superiorfrontal\_14)(lh.superiorfrontal\_7)(lh.superiorfrontal\_8)  
6494 0.81643 (lh.superiorfrontal\_10)(lh.superiorfrontal\_11)(lh.superiorfrontal\_4)(lh.superiorfrontal\_7)(lh.superiorfrontal\_9)  
6495 0.81643 (lh.superiortemporal\_11)(lh.superiortemporal\_7)  
6496 0.81643 (rh.bankssts\_2)(rh.supramarginal\_8)  
6497 0.81643 (rh.caudalmiddlefrontal\_1)(rh.precentral\_13)  
6498 0.81643 (rh.caudalmiddlefrontal\_4)(rh.superiorfrontal\_11)(rh.superiorfrontal\_7)(rh.superiorfrontal\_9)  
6499 0.81643 (rh.fusiform\_4)(rh.inferiortemporal\_6)  
6500 0.81643 (rh.inferiortemporal\_3)(rh.middletemporal\_4)(rh.middletemporal\_7)

6501 0.81643 (rh.insula\_1)(rh.precentral\_11)(rh.superiorparietal\_1)  
6502 0.81643 (rh.lateraloccipital\_1)(rh.lateraloccipital\_4)(rh.pericalcarine\_3)  
6503 0.81643 (rh.lateraloccipital\_4)(rh.lateraloccipital\_6)(rh.lateraloccipital\_7)  
6504 0.81643 (rh.lateraloccipital\_5)(rh.lateraloccipital\_7)(rh.pericalcarine\_4)  
6505 0.81643 (rh.lateralorbitofrontal\_2)(rh.lateralorbitofrontal\_6)(rh.parstriangularis\_4)  
6506 0.81643 (rh.lateralorbitofrontal\_7)(rh.parstriangularis\_1)(rh.parstriangularis\_4)(rh.rostralmiddlefrontal\_12)  
6507 0.81643 (rh.lateralorbitofrontal\_7)(rh.parstriangularis\_1)(rh.rostralmiddlefrontal\_13)  
6508 0.81643 (rh.medialorbitofrontal\_2)(rh.rostralmiddlefrontal\_12)(rh.rostralmiddlefrontal\_8)  
6509 0.81643 (rh.middletemporal\_8)(rh.superiortemporal\_7)  
6510 0.81643 (rh.paracentral\_4)(rh.precentral\_14)(rh.superiorfrontal\_16)  
6511 0.81643 (rh.paracentral\_6)(rh.precuneus\_10)(rh.superiorparietal\_2)  
6512 0.81643 (rh.parsopercularis\_4)(rh.rostralmiddlefrontal\_8)  
6513 0.81643 (rh.precuneus\_1)(rh.superiorparietal\_11)(rh.superiorparietal\_13)  
6514 0.81643 (rh.precuneus\_4)(rh.superiorparietal\_1)(rh.superiorparietal\_11)  
6515 0.81643 (rh.precuneus\_5)(rh.precuneus\_7)(rh.superiorparietal\_10)  
6516 0.81643 (rh.superiorfrontal\_11)(rh.superiorfrontal\_13)(rh.superiorfrontal\_15)  
6517 0.81643 (rh.superiortemporal\_4)(rh.superiortemporal\_5)  
6518 0.81643 (Right-Caudate)(lh.posteriorcingulate\_2)  
6519 0.81643 (Right-Caudate)(rh.caudalmiddlefrontal\_4)(rh.rostralmiddlefrontal\_8)  
6520 0.81643 (Right-Caudate)(rh.caudalmiddlefrontal\_4)(rh.superiorfrontal\_13)(rh.superiorfrontal\_7)  
6521 0.81643 (Right-Caudate)(Right-Putamen)(rh.caudalmiddlefrontal\_4)(rh.rostralmiddlefrontal\_8)  
6522 0.81643 (Right-Caudate)(Right-Putamen)(rh.parsopercularis\_2)(rh.parsopercularis\_4)  
6523 0.81643 (Right-Putamen)(rh.caudalmiddlefrontal\_1)(rh.caudalmiddlefrontal\_2)  
6524 0.81643 (Right-Putamen)(rh.caudalmiddlefrontal\_4)(rh.superiorfrontal\_9)  
6525 0.81643 (Right-Putamen)(rh.lateralorbitofrontal\_6)(rh.parstriangularis\_1)(rh.rostralmiddlefrontal\_3)  
6526 0.81643 (Right-Putamen)(rh.rostralmiddlefrontal\_9)(rh.superiorfrontal\_7)  
6527 0.81643 (Right-Thalamus-Proper)(rh.transversetemporal\_1)  
6528 0.81401 (Left-Accumbens-area)(Right-Caudate)(lh.rostralanteriorcingulate\_1)  
6529 0.81401 (Left-Caudate)(Left-Putamen)(lh.caudalmiddlefrontal\_1)(lh.caudalmiddlefrontal\_3)(lh.rostralmiddlefrontal\_1)  
6530 0.81401 (Left-Caudate)(Left-Putamen)(lh.lateralorbitofrontal\_7)(lh.medialorbitofrontal\_2)(lh.rostralanteriorcingulate\_1)(lh.rostralmiddlefrontal\_12)(lh.rostralmiddlefrontal\_9)  
6531 0.81401 (Left-Caudate)(Left-Putamen)(lh.postcentral\_8)(lh.precentral\_11)(lh.precentral\_7)  
6532 0.81401 (Left-Caudate)(lh.caudalanteriorcingulate\_2)(lh.caudalmiddlefrontal\_1)(lh.superiorfrontal\_11)  
6533 0.81401 (Left-Caudate)(lh.lateralorbitofrontal\_4)(lh.lateralorbitofrontal\_6)(lh.rostralmiddlefrontal\_12)  
6534 0.81401 (Left-Caudate)(lh.parstriangularis\_3)(lh.rostralmiddlefrontal\_1)(lh.rostralmiddlefrontal\_12)(lh.rostralmiddlefrontal\_9)  
6535 0.81401 (Left-Caudate)(lh.precentral\_4)(lh.precentral\_9)  
6536 0.81401 (Left-Caudate)(lh.superiorfrontal\_11)(lh.superiorfrontal\_12)(lh.superiorfrontal\_4)(lh.superiorfrontal\_8)  
6537 0.81401 (Left-Caudate)(Right-Caudate)(lh.posteriorcingulate\_2)  
6538 0.81401 (Left-Hippocampus)(lh.fusiform\_5)(lh.fusiform\_6)(lh.fusiform\_7)  
6539 0.81401 (Left-Hippocampus)(lh.isthmuscingulate\_3)(lh.precuneus\_10)  
6540 0.81401 (Left-Hippocampus)(lh.precuneus\_10)  
6541 0.81401 (Left-Putamen)(lh.caudalanteriorcingulate\_2)(lh.caudalmiddlefrontal\_3)(lh.superiorfrontal\_11)(lh.superiorfrontal\_12)  
6542 0.81401 (Left-Putamen)(lh.insula\_1)(lh.supramarginal\_1)(lh.supramarginal\_9)  
6543 0.81401 (Left-Putamen)(lh.insula\_6)(lh.rostralmiddlefrontal\_1)(lh.rostralmiddlefrontal\_4)(lh.rostralmiddlefrontal\_9)  
6544 0.81401 (Left-Putamen)(lh.lateralorbitofrontal\_6)(lh.parstriangularis\_3)(lh.rostralmiddlefrontal\_1)(lh.rostralmiddlefrontal\_12)  
6545 0.81401 (Left-Putamen)(lh.lateralorbitofrontal\_7)(lh.medialorbitofrontal\_4)(lh.medialorbitofrontal\_5)  
6546 0.81401 (Left-Putamen)(lh.lateralorbitofrontal\_7)(lh.parstriangularis\_3)(lh.rostralmiddlefrontal\_1)  
6547 0.81401 (Left-Putamen)(lh.parstriangularis\_3)(lh.rostralanteriorcingulate\_2)(lh.rostralmiddlefrontal\_4)  
6548 0.81401 (lh.caudalmiddlefrontal\_1)(lh.rostralmiddlefrontal\_1)(lh.rostralmiddlefrontal\_3)  
6549 0.81401 (lh.caudalmiddlefrontal\_1)(lh.rostralmiddlefrontal\_4)(lh.superiorfrontal\_11)  
6550 0.81401 (lh.fusiform\_2)(lh.lateraloccipital\_6)(lh.lateraloccipital\_8)

6551 0.81401 (lh.inferiorparietal\_1)(lh.lingual\_8)  
6552 0.81401 (lh.inferiorparietal\_1)(lh.precuneus\_11)(lh.precuneus\_9)  
6553 0.81401 (lh.inferiorparietal\_4)(lh.pericalcarine\_3)  
6554 0.81401 (lh.isthmuscingulate\_3)(lh.lingual\_6)(lh.lingual\_7)  
6555 0.81401 (lh.lateraloccipital\_3)(lh.pericalcarine\_1)(lh.pericalcarine\_2)(lh.pericalcarine\_3)  
6556 0.81401 (lh.lateraloccipital\_5)(lh.lateraloccipital\_6)  
6557 0.81401 (lh.lateraloccipital\_7)(lh.lingual\_6)(lh.pericalcarine\_3)  
6558 0.81401 (lh.paracentral\_3)(lh.precentral\_2)  
6559 0.81401 (lh.postcentral\_8)(lh.precentral\_7)(lh.supramarginal\_9)  
6560 0.81401 (lh.precuneus\_2)(lh.precuneus\_3)(lh.superiorparietal\_5)  
6561 0.81401 (lh.rostralanteriorcingulate\_1)(lh.superiorfrontal\_2)(lh.superiorfrontal\_3)(lh.superiorfrontal\_4)  
6562 0.81401 (lh.rostralmiddlefrontal\_1)(lh.rostralmiddlefrontal\_4)(lh.rostralmiddlefrontal\_8)(lh.rostralmiddlefrontal\_9)  
6563 0.81401 (lh.superiorfrontal\_10)(lh.superiorfrontal\_11)(lh.superiorfrontal\_3)(lh.superiorfrontal\_4)  
6564 0.81401 (lh.superiorfrontal\_10)(lh.superiorfrontal\_11)(lh.superiorfrontal\_3)  
6565 0.81401 (rh.bankssts\_3)(rh.superiortemporal\_1)(rh.superiortemporal\_3)  
6566 0.81401 (rh.caudalmiddlefrontal\_4)(rh.superiorfrontal\_13)(rh.superiorfrontal\_14)  
6567 0.81401 (rh.cuneus\_2)(rh.cuneus\_3)(rh.pericalcarine\_2)  
6568 0.81401 (rh.cuneus\_4)(rh.lateraloccipital\_1)(rh.lateraloccipital\_3)  
6569 0.81401 (rh.cuneus\_4)(rh.pericalcarine\_4)  
6570 0.81401 (rh.fusiform\_1)(rh.inferiorparietal\_12)  
6571 0.81401 (rh.fusiform\_1)(rh.lateraloccipital\_4)(rh.pericalcarine\_3)  
6572 0.81401 (rh.fusiform\_1)(rh.lateraloccipital\_7)(rh.lingual\_2)(rh.pericalcarine\_3)  
6573 0.81401 (rh.inferiortemporal\_4)(rh.inferiortemporal\_5)(rh.middletemporal\_4)(rh.middletemporal\_6)  
6574 0.81401 (rh.insula\_3)(rh.postcentral\_1)(rh.precentral\_7)  
6575 0.81401 (rh.lateraloccipital\_5)(rh.lateraloccipital\_7)(rh.pericalcarine\_3)  
6576 0.81401 (rh.lateraloccipital\_7)(rh.lateraloccipital\_8)(rh.pericalcarine\_3)  
6577 0.81401 (rh.lateraloccipital\_8)(rh.lingual\_2)(rh.pericalcarine\_3)  
6578 0.81401 (rh.lateralorbitofrontal\_6)(rh.lateralorbitofrontal\_7)(rh.parstriangularis\_1)(rh.rostralmiddlefrontal\_13)  
6579 0.81401 (rh.paracentral\_4)(rh.precentral\_13)(rh.superiorfrontal\_14)  
6580 0.81401 (rh.parstriangularis\_1)(rh.rostralmiddlefrontal\_8)(rh.superiorfrontal\_2)  
6581 0.81401 (rh.parstriangularis\_4)(rh.rostralmiddlefrontal\_6)  
6582 0.81401 (rh.precentral\_11)(rh.supramarginal\_8)  
6583 0.81401 (rh.precuneus\_10)(rh.precuneus\_4)  
6584 0.81401 (rh.precuneus\_2)(rh.precuneus\_3)  
6585 0.81401 (rh.precuneus\_7)(rh.superiorparietal\_1)(rh.superiorparietal\_7)(rh.superiorparietal\_8)  
6586 0.81401 (rh.rostralanteriorcingulate\_2)(rh.rostralmiddlefrontal\_3)  
6587 0.81401 (rh.superiorfrontal\_11)(rh.superiorfrontal\_15)(rh.superiorfrontal\_16)  
6588 0.81401 (Right-Accumbens-area)(rh.medialorbitofrontal\_5)  
6589 0.81401 (Right-Caudate)(rh.insula\_1)(rh.precentral\_13)  
6590 0.81401 (Right-Caudate)(rh.lateralorbitofrontal\_2)(rh.lateralorbitofrontal\_6)(rh.lateralorbitofrontal\_7)  
6591 0.81401 (Right-Caudate)(rh.lateralorbitofrontal\_4)(rh.medialorbitofrontal\_2)  
6592 0.81401 (Right-Caudate)(Right-Putamen)(rh.insula\_1)(rh.precentral\_13)  
6593 0.81401 (Right-Caudate)(Right-Putamen)(rh.lateralorbitofrontal\_2)(rh.lateralorbitofrontal\_6)(rh.lateralorbitofrontal\_7)  
6594 0.81401 (Right-Hippocampus)(rh.inferiorparietal\_10)(rh.middletemporal\_1)  
6595 0.81401 (Right-Hippocampus)(rh.middletemporal\_4)(rh.superiortemporal\_6)  
6596 0.81401 (Right-Putamen)(rh.lateralorbitofrontal\_1)(rh.lateralorbitofrontal\_2)  
6597 0.81401 (Right-Putamen)(rh.medialorbitofrontal\_2)(rh.rostralmiddlefrontal\_11)(rh.rostralmiddlefrontal\_12)  
6598 0.81401 (Right-Putamen)(rh.parsopercularis\_4)(rh.rostralmiddlefrontal\_8)  
6599 0.81159 (Left-Caudate)(Left-Putamen)(lh.caudalmiddlefrontal\_3)(lh.caudalmiddlefrontal\_6)  
6600 0.81159 (Left-Caudate)(Left-Putamen)(lh.lateralorbitofrontal\_7)(lh.parstriangularis\_3)(lh.rostralanteriorcingulate\_1)(lh.rostralmiddlefrontal\_12)

6601 0.81159 (Left-Caudate)(Left-Putamen)(lh.parstriangularis\_3)(lh.rostralanteriocingulate\_1)(lh.rostralmiddlefrontal\_4)(lh.rostralmiddlefrontal\_9)  
6602 0.81159 (Left-Caudate)(Left-Putamen)(lh.posteriorcingulate\_1)(lh.posteriorcingulate\_2)  
6603 0.81159 (Left-Caudate)(lh.caudalmiddlefrontal\_3)(lh.caudalmiddlefrontal\_4)(lh.superiorfrontal\_12)  
6604 0.81159 (Left-Caudate)(lh.caudalmiddlefrontal\_3)(lh.parsopercularis\_3)(lh.rostralmiddlefrontal\_1)  
6605 0.81159 (Left-Caudate)(lh.medialorbitofrontal\_2)(lh.parstriangularis\_3)(lh.rostralanteriocingulate\_1)(lh.rostralmiddlefrontal\_9)  
6606 0.81159 (Left-Caudate)(lh.medialorbitofrontal\_2)(lh.rostralmiddlefrontal\_12)(lh.rostralmiddlefrontal\_9)(lh.superiorfrontal\_3)  
6607 0.81159 (Left-Caudate)(lh.paracentral\_5)(lh.superiorfrontal\_14)(lh.superiorfrontal\_8)  
6608 0.81159 (Left-Caudate)(lh.rostralanteriocingulate\_1)(lh.rostralmiddlefrontal\_12)(lh.superiorfrontal\_3)  
6609 0.81159 (Left-Caudate)(lh.rostralmiddlefrontal\_1)(lh.rostralmiddlefrontal\_9)(lh.superiorfrontal\_4)  
6610 0.81159 (Left-Putamen)(lh.caudalmiddlefrontal\_3)(lh.caudalmiddlefrontal\_6)  
6611 0.81159 (Left-Putamen)(lh.caudalmiddlefrontal\_3)(lh.rostralmiddlefrontal\_1)(lh.rostralmiddlefrontal\_3)  
6612 0.81159 (Left-Putamen)(lh.caudalmiddlefrontal\_4)(lh.insula\_6)  
6613 0.81159 (Left-Putamen)(lh.insula\_1)(lh.superiorparietal\_3)(lh.supramarginal\_1)  
6614 0.81159 (Left-Putamen)(lh.lateralorbitofrontal\_4)(lh.parstriangularis\_3)(lh.rostralanteriocingulate\_1)(lh.rostralmiddlefrontal\_12)  
6615 0.81159 (Left-Putamen)(lh.lateralorbitofrontal\_7)(lh.rostralmiddlefrontal\_1)(lh.rostralmiddlefrontal\_9)  
6616 0.81159 (Left-Putamen)(lh.posteriorcingulate\_1)(lh.posteriorcingulate\_2)  
6617 0.81159 (Left-Putamen)(lh.rostralanteriocingulate\_1)(lh.rostralmiddlefrontal\_8)  
6618 0.81159 (Left-Putamen)(lh.rostralanteriocingulate\_1)(lh.rostralmiddlefrontal\_9)(lh.superiorfrontal\_3)(lh.superiorfrontal\_4)  
6619 0.81159 (Left-Putamen)(lh.rostralmiddlefrontal\_8)(lh.rostralmiddlefrontal\_9)(lh.superiorfrontal\_3)  
6620 0.81159 (Left-Putamen)(lh.rostralmiddlefrontal\_8)(lh.rostralmiddlefrontal\_9)(lh.superiorfrontal\_4)  
6621 0.81159 (Left-Putamen)(lh.superiorfrontal\_8)  
6622 0.81159 (Left-Thalamus-Proper)(lh.superiortemporal\_3)  
6623 0.81159 (lh.caudalmiddlefrontal\_4)(lh.caudalmiddlefrontal\_5)(lh.precentral\_9)  
6624 0.81159 (lh.caudalmiddlefrontal\_4)(lh.insula\_6)  
6625 0.81159 (lh.fusiform\_4)(lh.inferiortemporal\_8)(lh.lateraloccipital\_9)  
6626 0.81159 (lh.inferiorparietal\_5)(lh.supramarginal\_6)  
6627 0.81159 (lh.lateraloccipital\_11)(lh.lateraloccipital\_3)(lh.lateraloccipital\_6)(lh.pericalcarine\_2)  
6628 0.81159 (lh.lateraloccipital\_11)(lh.lateraloccipital\_6)(lh.lateraloccipital\_7)  
6629 0.81159 (lh.lateraloccipital\_11)(lh.lateraloccipital\_6)(lh.pericalcarine\_2)(lh.pericalcarine\_3)  
6630 0.81159 (lh.lateraloccipital\_4)(lh.pericalcarine\_2)  
6631 0.81159 (lh.lateralorbitofrontal\_4)(lh.medialorbitofrontal\_2)(lh.rostralmiddlefrontal\_12)(lh.rostralmiddlefrontal\_9)  
6632 0.81159 (lh.medialorbitofrontal\_2)(lh.rostralanteriocingulate\_1)(lh.superiorfrontal\_1)(lh.superiorfrontal\_3)  
6633 0.81159 (lh.paracentral\_4)(lh.superiorfrontal\_14)(lh.superiorfrontal\_16)  
6634 0.81159 (lh.parstriangularis\_3)(lh.rostralmiddlefrontal\_9)(lh.superiorfrontal\_3)  
6635 0.81159 (lh.parstriangularis\_3)(lh.superiorfrontal\_3)  
6636 0.81159 (lh.postcentral\_14)(lh.supramarginal\_1)(lh.supramarginal\_2)(lh.supramarginal\_4)  
6637 0.81159 (lh.precuneus\_6)(lh.superiorparietal\_6)(lh.superiorparietal\_7)  
6638 0.81159 (lh.rostralanteriocingulate\_2)(lh.superiorfrontal\_3)(lh.superiorfrontal\_4)  
6639 0.81159 (lh.rostralmiddlefrontal\_1)(lh.rostralmiddlefrontal\_4)(lh.superiorfrontal\_10)  
6640 0.81159 (lh.rostralmiddlefrontal\_11)(lh.rostralmiddlefrontal\_9)  
6641 0.81159 (lh.rostralmiddlefrontal\_8)(lh.superiorfrontal\_10)(lh.superiorfrontal\_3)  
6642 0.81159 (lh.superiorfrontal\_10)(lh.superiorfrontal\_11)(lh.superiorfrontal\_4)(lh.superiorfrontal\_8)(lh.superiorfrontal\_9)  
6643 0.81159 (rh.bankssts\_1)(rh.bankssts\_2)(rh.superiortemporal\_3)  
6644 0.81159 (rh.bankssts\_2)(rh.middletemporal\_2)  
6645 0.81159 (rh.caudalmiddlefrontal\_4)(rh.parsopercularis\_4)(rh.rostralmiddlefrontal\_1)  
6646 0.81159 (rh.inferiorparietal\_10)(rh.inferiorparietal\_6)(rh.inferiorparietal\_8)  
6647 0.81159 (rh.inferiorparietal\_11)(rh.inferiorparietal\_8)  
6648 0.81159 (rh.inferiorparietal\_12)(rh.lateraloccipital\_10)  
6649 0.81159 (rh.insula\_7)(rh.rostralmiddlefrontal\_3)(rh.rostralmiddlefrontal\_8)  
6650 0.81159 (rh.lateraloccipital\_3)(rh.pericalcarine\_1)(rh.pericalcarine\_2)

6651 0.81159 (rh.lateraloccipital\_4)(rh.precuneus\_1)  
6652 0.81159 (rh.lateralorbitofrontal\_6)(rh.parstriangularis\_1)(rh.parstriangularis\_4)(rh.rostralmiddlefrontal\_12)(rh.rostralmiddlefrontal\_8)  
6653 0.81159 (rh.lateralorbitofrontal\_6)(rh.superiorfrontal\_2)  
6654 0.81159 (rh.middletemporal\_9)(rh.superiortemporal\_6)  
6655 0.81159 (rh.postcentral\_1)(rh.postcentral\_3)(rh.supramarginal\_7)  
6656 0.81159 (rh.precentral\_5)(rh.precentral\_9)  
6657 0.81159 (rh.rostralmiddlefrontal\_10)(rh.rostralmiddlefrontal\_11)(rh.rostralmiddlefrontal\_8)(rh.superiorfrontal\_2)  
6658 0.81159 (Right-Accumbens-area)(Right-Amygdala)(Right-Caudate)(Right-Hippocampus)(Right-Pallidum)(Right-Thalamus-Proper)  
6659 0.81159 (Right-Accumbens-area)(Right-Amygdala)(Right-Caudate)(Right-Hippocampus)(Right-Pallidum)  
6660 0.81159 (Right-Accumbens-area)(Right-Amygdala)(Right-Caudate)(Right-Hippocampus)(Right-Thalamus-Proper)  
6661 0.81159 (Right-Accumbens-area)(Right-Amygdala)(Right-Caudate)(Right-Hippocampus)  
6662 0.81159 (Right-Caudate)(rh.caudalmiddlefrontal\_4)(rh.superiorfrontal\_13)(rh.superiorfrontal\_9)  
6663 0.81159 (Right-Caudate)(rh.lateralorbitofrontal\_2)(rh.lateralorbitofrontal\_6)(rh.parstriangularis\_1)  
6664 0.81159 (Right-Caudate)(rh.rostralmiddlefrontal\_11)  
6665 0.81159 (Right-Caudate)(Right-Putamen)(rh.lateralorbitofrontal\_4)(rh.medialorbitofrontal\_2)  
6666 0.81159 (Right-Hippocampus)(rh.inferiortemporal\_7)  
6667 0.81159 (Right-Putamen)(rh.lateralorbitofrontal\_7)(rh.medialorbitofrontal\_2)(rh.rostralmiddlefrontal\_12)(rh.rostralmiddlefrontal\_13)  
6668 0.81159 (Right-Putamen)(rh.medialorbitofrontal\_2)(rh.rostralmiddlefrontal\_12)(rh.rostralmiddlefrontal\_8)  
6669 0.81159 (Right-Putamen)(rh.rostralmiddlefrontal\_5)(rh.rostralmiddlefrontal\_9)  
6670 0.81159 (Right-Putamen)(rh.rostralmiddlefrontal\_8)(rh.rostralmiddlefrontal\_9)(rh.superiorfrontal\_2)  
6671 0.81159 (Right-Putamen)(rh.rostralmiddlefrontal\_8)(rh.superiorfrontal\_2)(rh.superiorfrontal\_7)  
6672 0.80918 (Left-Accumbens-area)(Left-Caudate)(Right-Caudate)(lh.rostralanteriorcingulate\_1)  
6673 0.80918 (Left-Caudate)(Left-Pallidum)(Left-Putamen)(lh.precentral\_14)  
6674 0.80918 (Left-Caudate)(Left-Pallidum)(lh.precentral\_14)  
6675 0.80918 (Left-Caudate)(Left-Putamen)(lh.caudalanteriorcingulate\_2)(lh.caudalmiddlefrontal\_3)(lh.superiorfrontal\_11)(lh.superiorfrontal\_12)  
6676 0.80918 (Left-Caudate)(Left-Putamen)(lh.lateralorbitofrontal\_2)(lh.lateralorbitofrontal\_7)(lh.medialorbitofrontal\_5)  
6677 0.80918 (Left-Caudate)(Left-Putamen)(lh.lateralorbitofrontal\_4)(lh.lateralorbitofrontal\_6)(lh.rostralmiddlefrontal\_12)  
6678 0.80918 (Left-Caudate)(Left-Putamen)(lh.lateralorbitofrontal\_6)(lh.lateralorbitofrontal\_7)(lh.rostralmiddlefrontal\_12)(lh.rostralmiddlefrontal\_9)  
6679 0.80918 (Left-Caudate)(Left-Putamen)(lh.rostralanteriorcingulate\_2)(lh.superiorfrontal\_10)  
6680 0.80918 (Left-Caudate)(Left-Putamen)(lh.rostralmiddlefrontal\_12)(lh.superiorfrontal\_4)  
6681 0.80918 (Left-Caudate)(Left-Putamen)(lh.rostralmiddlefrontal\_3)  
6682 0.80918 (Left-Caudate)(Left-Thalamus-Proper)(lh.precentral\_7)(lh.precentral\_9)  
6683 0.80918 (Left-Caudate)(lh.lateralorbitofrontal\_6)(lh.medialorbitofrontal\_2)  
6684 0.80918 (Left-Caudate)(lh.superiorfrontal\_10)(lh.superiorfrontal\_12)  
6685 0.80918 (Left-Caudate)(lh.superiorfrontal\_12)(lh.superiorfrontal\_14)(lh.superiorfrontal\_4)  
6686 0.80918 (Left-Pallidum)(Left-Putamen)(Left-Thalamus-Proper)(lh.precentral\_11)(lh.precentral\_9)  
6687 0.80918 (Left-Pallidum)(Left-Thalamus-Proper)(lh.precentral\_11)(lh.precentral\_9)  
6688 0.80918 (Left-Putamen)(lh.lateralorbitofrontal\_6)(lh.parstriangularis\_3)(lh.rostralmiddlefrontal\_1)(lh.rostralmiddlefrontal\_12)(lh.rostralmiddlefrontal\_9)  
6689 0.80918 (Left-Putamen)(lh.parstriangularis\_3)(lh.rostralmiddlefrontal\_8)  
6690 0.80918 (Left-Putamen)(lh.rostralanteriorcingulate\_1)(lh.rostralanteriorcingulate\_2)(lh.rostralmiddlefrontal\_9)(lh.superiorfrontal\_4)  
6691 0.80918 (Left-Thalamus-Proper)(lh.isthmuscingulate\_2)(lh.posteriorcingulate\_4)  
6692 0.80918 (lh.bankssts\_3)(lh.inferiortemporal\_7)  
6693 0.80918 (lh.caudalmiddlefrontal\_1)(lh.caudalmiddlefrontal\_4)(lh.caudalmiddlefrontal\_6)  
6694 0.80918 (lh.cuneus\_1)(lh.inferiorparietal\_1)(lh.pericalcarine\_3)  
6695 0.80918 (lh.fusiform\_2)(lh.inferiorparietal\_4)  
6696 0.80918 (lh.fusiform\_2)(lh.lateraloccipital\_11)(lh.lateraloccipital\_6)(lh.lingual\_1)(lh.pericalcarine\_3)  
6697 0.80918 (lh.fusiform\_5)(lh.inferiortemporal\_7)(lh.inferiortemporal\_8)  
6698 0.80918 (lh.fusiform\_7)(lh.inferiortemporal\_8)  
6699 0.80918 (lh.inferiorparietal\_9)(lh.precuneus\_9)  
6700 0.80918 (lh.inferiortemporal\_6)(lh.middletemporal\_4)

6701 0.80918 (lh.lateralorbitofrontal\_4)(lh.lateralorbitofrontal\_7)(lh.medialorbitofrontal\_2)(lh.rostralmiddlefrontal\_12)  
6702 0.80918 (lh.lateralorbitofrontal\_4)(lh.parstriangularis\_3)(lh.rostralmiddlefrontal\_1)(lh.rostralmiddlefrontal\_9)  
6703 0.80918 (lh.lateralorbitofrontal\_4)(lh.rostralmiddlefrontal\_12)(lh.rostralmiddlefrontal\_6)  
6704 0.80918 (lh.paracentral\_1)(lh.paracentral\_4)(lh.paracentral\_5)(lh.precentral\_3)  
6705 0.80918 (lh.paracentral\_5)(lh.precentral\_4)(lh.superiorfrontal\_12)  
6706 0.80918 (lh.paracentral\_5)(lh.superiorparietal\_1)  
6707 0.80918 (lh.parsorbitalis\_1)(lh.rostralmiddlefrontal\_11)  
6708 0.80918 (lh.precuneus\_10)(lh.precuneus\_6)(lh.superiorparietal\_5)  
6709 0.80918 (lh.precuneus\_3)(lh.superiorparietal\_6)(lh.superiorparietal\_7)  
6710 0.80918 (lh.rostralanteriorcingulate\_1)(lh.rostralmiddlefrontal\_8)(lh.rostralmiddlefrontal\_9)(lh.superiorfrontal\_3)  
6711 0.80918 (lh.rostralmiddlefrontal\_12)(lh.rostralmiddlefrontal\_8)(lh.rostralmiddlefrontal\_9)  
6712 0.80918 (lh.rostralmiddlefrontal\_8)(lh.superiorfrontal\_10)(lh.superiorfrontal\_3)(lh.superiorfrontal\_4)  
6713 0.80918 (lh.superiorfrontal\_11)(lh.superiorfrontal\_12)(lh.superiorfrontal\_14)(lh.superiorfrontal\_4)  
6714 0.80918 (lh.superiorfrontal\_12)(lh.superiorfrontal\_14)(lh.superiorfrontal\_15)(lh.superiorfrontal\_17)  
6715 0.80918 (lh.superiorfrontal\_12)(lh.superiorfrontal\_15)(lh.superiorfrontal\_17)  
6716 0.80918 (rh.fusiform\_1)(rh.lingual\_5)(rh.lingual\_6)  
6717 0.80918 (rh.lateraloccipital\_8)(rh.pericalcarine\_1)(rh.superiorparietal\_11)  
6718 0.80918 (rh.parstriangularis\_1)(rh.rostralmiddlefrontal\_12)(rh.rostralmiddlefrontal\_7)  
6719 0.80918 (rh.parstriangularis\_1)(rh.rostralmiddlefrontal\_3)(rh.rostralmiddlefrontal\_6)(rh.rostralmiddlefrontal\_8)  
6720 0.80918 (rh.parstriangularis\_2)(rh.parstriangularis\_4)(rh.rostralmiddlefrontal\_8)  
6721 0.80918 (rh.precentral\_7)(rh.superiorparietal\_1)  
6722 0.80918 (rh.precuneus\_4)(rh.precuneus\_7)(rh.superiorparietal\_1)(rh.superiorparietal\_10)  
6723 0.80918 (rh.superiorparietal\_1)(rh.superiorparietal\_10)(rh.superiorparietal\_11)  
6724 0.80918 (rh.superiorparietal\_2)(rh.supramarginal\_8)  
6725 0.80918 (Right-Caudate)(rh.caudalmiddlefrontal\_4)(rh.precentral\_13)(rh.precentral\_7)  
6726 0.80918 (Right-Caudate)(rh.caudalmiddlefrontal\_5)(rh.precentral\_13)  
6727 0.80918 (Right-Caudate)(rh.isthmuscingulate\_1)(rh.posteriorcingulate\_3)  
6728 0.80918 (Right-Caudate)(rh.precentral\_10)(rh.precentral\_13)(rh.precentral\_7)  
6729 0.80918 (Right-Caudate)(Right-Putamen)(rh.rostralmiddlefrontal\_12)(rh.superiorfrontal\_2)  
6730 0.80918 (Right-Caudate)(Right-Putamen)(rh.rostralmiddlefrontal\_3)(rh.rostralmiddlefrontal\_5)  
6731 0.80918 (Right-Caudate)(Right-Putamen)(rh.superiorfrontal\_14)  
6732 0.80918 (Right-Hippocampus)(rh.inferiortemporal\_6)  
6733 0.80918 (Right-Putamen)(rh.caudalmiddlefrontal\_5)(rh.parsopercularis\_4)  
6734 0.80918 (Right-Putamen)(rh.parstriangularis\_1)(rh.superiorfrontal\_2)  
6735 0.80918 (Right-Putamen)(rh.rostralmiddlefrontal\_2)  
6736 0.80918 (Right-Putamen)(Right-Thalamus-Proper)(rh.insula\_2)(rh.precentral\_7)  
6737 0.80918 (Right-Thalamus-Proper)(rh.insula\_2)(rh.precentral\_7)  
6738 0.80676 (Left-Caudate)(Left-Pallidum)(Left-Putamen)(Left-Thalamus-Proper)(lh.precentral\_11)(lh.precentral\_9)  
6739 0.80676 (Left-Caudate)(Left-Pallidum)(Left-Thalamus-Proper)(lh.precentral\_11)(lh.precentral\_9)  
6740 0.80676 (Left-Caudate)(Left-Putamen)(lh.medialorbitofrontal\_2)(lh.medialorbitofrontal\_4)(lh.rostralanteriorcingulate\_1)  
6741 0.80676 (Left-Caudate)(Left-Putamen)(lh.precentral\_4)(lh.precentral\_9)  
6742 0.80676 (Left-Caudate)(Left-Thalamus-Proper)(lh.paracentral\_5)(lh.posteriorcingulate\_3)  
6743 0.80676 (Left-Caudate)(lh.lateralorbitofrontal\_4)(lh.parstriangularis\_3)(lh.rostralanteriorcingulate\_1)  
6744 0.80676 (Left-Caudate)(lh.rostralanteriorcingulate\_1)(lh.rostralanteriorcingulate\_2)(lh.rostralmiddlefrontal\_4)(lh.rostralmiddlefrontal\_9)  
6745 0.80676 (Left-Putamen)(lh.lateralorbitofrontal\_4)(lh.lateralorbitofrontal\_7)(lh.medialorbitofrontal\_2)(lh.rostralmiddlefrontal\_12)  
6746 0.80676 (Left-Putamen)(lh.medialorbitofrontal\_2)(lh.medialorbitofrontal\_4)(lh.rostralanteriorcingulate\_1)  
6747 0.80676 (Left-Putamen)(lh.medialorbitofrontal\_2)(lh.parstriangularis\_3)(lh.rostralanteriorcingulate\_1)(lh.rostralmiddlefrontal\_12)(lh.rostralmiddlefrontal\_9)  
6748 0.80676 (Left-Putamen)(lh.rostralanteriorcingulate\_1)(lh.rostralmiddlefrontal\_12)(lh.rostralmiddlefrontal\_9)(lh.superiorfrontal\_4)  
6749 0.80676 (Left-Putamen)(lh.rostralanteriorcingulate\_1)(lh.rostralmiddlefrontal\_4)(lh.rostralmiddlefrontal\_9)(lh.superiorfrontal\_4)  
6750 0.80676 (lh.inferiorparietal\_4)(lh.lateraloccipital\_7)(lh.lateraloccipital\_9)

6751 0.80676 (lh.rostralmiddlefrontal\_4)(lh.rostralmiddlefrontal\_5)(lh.rostralmiddlefrontal\_7)  
6752 0.80676 (lh.superiorfrontal\_12)(lh.superiorfrontal\_14)(lh.superiorfrontal\_15)(lh.superiorfrontal\_8)  
6753 0.80676 (lh.superiorfrontal\_12)(lh.superiorfrontal\_15)(lh.superiorfrontal\_8)  
6754 0.80676 (lh.superiorfrontal\_4)(lh.superiorfrontal\_6)(lh.superiorfrontal\_9)  
6755 0.80676 (lh.supramarginal\_1)(lh.supramarginal\_3)  
6756 0.80676 (rh.bankssts\_1)(rh.fusiform\_6)  
6757 0.80676 (rh.caudalmiddlefrontal\_4)(rh.precentral\_10)(rh.precentral\_7)  
6758 0.80676 (rh.inferiorparietal\_11)(rh.inferiorparietal\_12)(rh.inferiorparietal\_8)  
6759 0.80676 (rh.insula\_1)(rh.supramarginal\_7)(rh.supramarginal\_8)(rh.supramarginal\_9)  
6760 0.80676 (rh.superiorfrontal\_13)(rh.superiorfrontal\_5)(rh.superiorfrontal\_7)(rh.superiorfrontal\_9)  
6761 0.80676 (Right-Amygdala)(Right-Hippocampus)(rh.insula\_2)(rh.insula\_4)  
6762 0.80676 (Right-Amygdala)(Right-Hippocampus)(Right-Putamen)(rh.insula\_2)(rh.insula\_4)  
6763 0.80676 (Right-Caudate)(rh.parstriangularis\_1)(rh.rostralmiddlefrontal\_5)  
6764 0.80676 (Right-Caudate)(rh.precentral\_13)(rh.precentral\_8)  
6765 0.80676 (Right-Caudate)(Right-Pallidum)(rh.caudalmiddlefrontal\_4)(rh.parsopercularis\_4)  
6766 0.80676 (Right-Caudate)(Right-Pallidum)(Right-Putamen)(rh.caudalmiddlefrontal\_4)(rh.parsopercularis\_4)  
6767 0.80676 (Right-Caudate)(Right-Putamen)(rh.caudalmiddlefrontal\_4)(rh.precentral\_13)(rh.precentral\_7)  
6768 0.80676 (Right-Caudate)(Right-Putamen)(rh.caudalmiddlefrontal\_5)(rh.superiorfrontal\_7)  
6769 0.80676 (Right-Caudate)(Right-Putamen)(rh.lateralorbitofrontal\_2)(rh.lateralorbitofrontal\_6)(rh.parstriangularis\_1)  
6770 0.80676 (Right-Hippocampus)(rh.bankssts\_2)(rh.inferiortemporal\_2)  
6771 0.80676 (Right-Hippocampus)(rh.fusiform\_8)(rh.middletemporal\_9)  
6772 0.80676 (Right-Pallidum)(rh.caudalmiddlefrontal\_4)(rh.parsopercularis\_4)  
6773 0.80676 (Right-Pallidum)(Right-Putamen)(rh.caudalmiddlefrontal\_4)(rh.parsopercularis\_4)  
6774 0.80676 (Right-Putamen)(rh.rostralmiddlefrontal\_5)(rh.superiorfrontal\_7)  
6775 0.80435 (Left-Caudate)(Left-Putamen)(Left-Thalamus-Proper)(lh.precentral\_7)(lh.precentral\_9)  
6776 0.80435 (Left-Caudate)(Left-Putamen)(lh.rostralanteriorcingulate\_2)(lh.rostralmiddlefrontal\_9)(lh.superiorfrontal\_4)  
6777 0.80435 (Left-Caudate)(lh.caudalanteriorcingulate\_2)(lh.superiorfrontal\_10)(lh.superiorfrontal\_14)  
6778 0.80435 (Left-Caudate)(lh.caudalmiddlefrontal\_3)(lh.caudalmiddlefrontal\_4)(lh.caudalmiddlefrontal\_6)  
6779 0.80435 (Left-Caudate)(lh.precentral\_11)(lh.precentral\_4)(lh.precentral\_9)  
6780 0.80435 (Left-Hippocampus)(Left-Thalamus-Proper)(lh.superiortemporal\_3)  
6781 0.80435 (Left-Putamen)(lh.caudalmiddlefrontal\_3)(lh.insula\_6)(lh.parsopercularis\_3)(lh.rostralmiddlefrontal\_1)  
6782 0.80435 (Left-Putamen)(lh.insula\_1)(lh.insula\_2)(lh.insula\_3)  
6783 0.80435 (Left-Putamen)(lh.insula\_6)(lh.parsopercularis\_1)(lh.parsopercularis\_3)(lh.parstriangularis\_3)(lh.rostralmiddlefrontal\_1)  
6784 0.80435 (Left-Putamen)(lh.lateralorbitofrontal\_4)(lh.lateralorbitofrontal\_7)(lh.parstriangularis\_3)(lh.rostralanteriorcingulate\_1)  
6785 0.80435 (Left-Putamen)(lh.lateralorbitofrontal\_4)(lh.parstriangularis\_3)(lh.rostralanteriorcingulate\_1)(lh.rostralmiddlefrontal\_12)(lh.rostralmiddlefrontal\_9)  
6786 0.80435 (lh.bankssts\_2)(lh.bankssts\_3)(lh.fusiform\_5)  
6787 0.80435 (lh.cuneus\_1)(lh.cuneus\_2)(lh.pericalcarine\_1)(lh.superiorparietal\_14)  
6788 0.80435 (lh.insula\_1)(lh.insula\_2)(lh.insula\_3)  
6789 0.80435 (lh.lateralorbitofrontal\_4)(lh.lateralorbitofrontal\_6)(lh.rostralmiddlefrontal\_12)(lh.rostralmiddlefrontal\_6)  
6790 0.80435 (lh.parstriangularis\_3)(lh.rostralmiddlefrontal\_1)(lh.rostralmiddlefrontal\_7)  
6791 0.80435 (lh.precuneus\_6)(lh.precuneus\_8)(lh.precuneus\_9)(lh.superiorparietal\_6)  
6792 0.80435 (lh.superiorfrontal\_11)(lh.superiorfrontal\_12)(lh.superiorfrontal\_14)(lh.superiorfrontal\_4)(lh.superiorfrontal\_8)  
6793 0.80435 (lh.superiorfrontal\_4)(lh.superiorfrontal\_6)(lh.superiorfrontal\_7)(lh.superiorfrontal\_9)  
6794 0.80435 (rh.inferiorparietal\_10)(rh.inferiorparietal\_4)(rh.insula\_2)  
6795 0.80435 (rh.inferiortemporal\_3)(rh.middletemporal\_6)(rh.middletemporal\_7)  
6796 0.80435 (rh.insula\_1)(rh.precentral\_13)(rh.precentral\_7)  
6797 0.80435 (rh.lateralorbitofrontal\_4)(rh.lateralorbitofrontal\_7)(rh.medialorbitofrontal\_2)  
6798 0.80435 (rh.paracentral\_6)(rh.precentral\_13)(rh.superiorparietal\_2)  
6799 0.80435 (rh.rostralanteriorcingulate\_2)(rh.rostralmiddlefrontal\_5)  
6800 0.80435 (rh.rostralmiddlefrontal\_12)(rh.rostralmiddlefrontal\_3)(rh.rostralmiddlefrontal\_6)(rh.rostralmiddlefrontal\_8)



6801 0.80435 (rh.rostralmiddlefrontal\_5)(rh.superiorfrontal\_2)(rh.superiorfrontal\_7)  
6802 0.80435 (rh.superiorfrontal\_11)(rh.superiorfrontal\_13)(rh.superiorfrontal\_7)(rh.superiorfrontal\_8)  
6803 0.80435 (Right-Putamen)(rh.caudalmiddlefrontal\_5)(rh.precentral\_13)  
6804 0.80435 (Right-Putamen)(rh.insula\_1)(rh.precentral\_13)(rh.precentral\_7)  
6805 0.80193 (Left-Amygdala)(lh.fusiform\_8)(lh.insula\_4)  
6806 0.80193 (Left-Caudate)(lh.medialorbitofrontal\_2)(lh.superiorfrontal\_3)(lh.superiorfrontal\_4)  
6807 0.80193 (Left-Putamen)(lh.caudalanteriorcingulate\_2)(lh.superiorfrontal\_8)  
6808 0.80193 (lh.bankssts\_2)(lh.fusiform\_7)(lh.middletemporal\_4)  
6809 0.80193 (lh.caudalanteriorcingulate\_1)(lh.rostralanteriorcingulate\_2)(lh.superiorfrontal\_11)  
6810 0.80193 (lh.precentral\_3)(lh.precentral\_4)  
6811 0.80193 (lh.precuneus\_6)(lh.precuneus\_9)(lh.superiorparietal\_5)(lh.superiorparietal\_6)  
6812 0.80193 (rh.caudalanteriorcingulate\_2)(rh.superiorfrontal\_9)  
6813 0.80193 (rh.inferiorparietal\_10)(rh.lateraloccipital\_10)(rh.lateraloccipital\_8)(rh.lingual\_7)  
6814 0.80193 (rh.postcentral\_5)(rh.precentral\_11)  
6815 0.80193 (Right-Caudate)(rh.medialorbitofrontal\_2)(rh.rostralmiddlefrontal\_11)
