# Supplementary material for: The frequent complete subgraphs in the human connectome
Source: PubMed Central journal article supplement (PMC7444532; doi:10.1371/journal.pone.0236883), 2020-08-20
Supplement: pone.0236883.s002.pdf [file pone.0236883.s002.pdf]

| p-value  | Holm-Bonferroni | frequency_male | frequency_female |                                                                                          |
|----------|-----------------|----------------|------------------|------------------------------------------------------------------------------------------|
| 0        | 1.00E-05        | 0.65143        | 0.89958          | (Right-Caudate)(Right-Putamen)(rh.superiorparietal_1)(rh.supramarginal_9)                |
| 0        | 1.00E-05        | 0.58857        | 0.85356          | (Right-Putamen)(Right-Thalamus-Proper)(rh.precentral_6)                                  |
| 0        | 1.00E-05        | 0.62286        | 0.87448          | (Right-Caudate)(Right-Putamen)(rh.insula_1)(rh.superiorparietal_1)(rh.supramarginal_9)   |
| 0        | 1.00E-05        | 0.63429        | 0.87448          | (Right-Caudate)(rh.insula_1)(rh.superiorparietal_1)(rh.supramarginal_9)                  |
| 0        | 1.00E-05        | 0.70286        | 0.91632          | (Right-Caudate)(Right-Putamen)(rh.superiorparietal_1)                                    |
| 0        | 1.00E-05        | 0.61538        | 0.85356          | (Right-Thalamus-Proper)(rh.precentral_6)                                                 |
| 0        | 1.00E-05        | 0.68           | 0.8954           | (Right-Thalamus-Proper)(rh.insula_1)(rh.precentral_7)                                    |
| 0        | 1.00E-05        | 0.68           | 0.8954           | (Right-Putamen)(Right-Thalamus-Proper)(rh.insula_1)(rh.precentral_7)                     |
| 0        | 1.00E-05        | 0.67429        | 0.89121          | (Right-Caudate)(Right-Putamen)(rh.insula_1)(rh.superiorparietal_1)                       |
| 0        | 1.00E-05        | 0.57143        | 0.8159           | (Right-Pallidum)(Right-Thalamus-Proper)(rh.precentral_6)                                 |
| 0        | 1.00E-05        | 0.57143        | 0.8159           | (Right-Pallidum)(Right-Putamen)(Right-Thalamus-Proper)(rh.precentral_6)                  |
| 0        | 1.00E-05        | 0.58286        | 0.82427          | (Right-Caudate)(Right-Putamen)(Right-Thalamus-Proper)(rh.precentral_6)                   |
| 0        | 1.00E-05        | 0.62637        | 0.85356          | (Left-Thalamus-Proper)(lh.superiorparietal_5)                                            |
| 0        | 1.00E-05        | 0.58857        | 0.82427          | (Right-Caudate)(Right-Thalamus-Proper)(rh.precentral_6)                                  |
| 0        | 1.00E-05        | 0.73714        | 0.92469          | (Left-Caudate)(Left-Putamen)(Left-Thalamus-Proper)(lh.supramarginal_1)                   |
| 0        | 1.00E-05        | 0.68571        | 0.89121          | (Right-Caudate)(rh.insula_1)(rh.superiorparietal_1)                                      |
| 0        | 1.00E-05        | 0.66857        | 0.87866          | (Right-Caudate)(Right-Thalamus-Proper)(rh.insula_1)(rh.precentral_7)                     |
| 0        | 1.00E-05        | 0.66857        | 0.87866          | (Right-Caudate)(Right-Putamen)(Right-Thalamus-Proper)(rh.insula_1)(rh.precentral_7)      |
| 0        | 1.00E-05        | 0.68132        | 0.88703          | (lh.inferiorparietal_5)(lh.inferiorparietal_8)                                           |
| 0        | 1.00E-05        | 0.70286        | 0.89958          | (Right-Caudate)(Right-Thalamus-Proper)(rh.precentral_7)                                  |
| 0        | 1.00E-05        | 0.70286        | 0.89958          | (Right-Caudate)(Right-Putamen)(Right-Thalamus-Proper)(rh.precentral_7)                   |
| 0        | 1.00E-05        | 0.62286        | 0.841            | (Right-Caudate)(Right-Thalamus-Proper)(rh.precentral_11)(rh.precentral_7)                |
| 0        | 1.00E-05        | 0.63429        | 0.84937          | (Right-Caudate)(Right-Putamen)(rh.precentral_13)(rh.superiorparietal_1)                  |
| 0        | 1.00E-05        | 0.71429        | 0.90377          | (Right-Putamen)(Right-Thalamus-Proper)(rh.precentral_7)                                  |
| 0        | 1.00E-05        | 0.6044         | 0.82427          | (Right-Caudate)(rh.superiorparietal_1)(rh.supramarginal_8)(rh.supramarginal_9)           |
| 0        | 1.00E-05        | 0.61538        | 0.83264          | (Right-Caudate)(rh.superiorparietal_1)(rh.supramarginal_8)                               |
| 0        | 1.00E-05        | 0.69714        | 0.89121          | (Right-Thalamus-Proper)(rh.insula_2)(rh.precentral_7)                                    |
| 0        | 1.00E-05        | 0.69714        | 0.89121          | (Right-Putamen)(Right-Thalamus-Proper)(rh.insula_2)(rh.precentral_7)                     |
| 0        | 1.00E-05        | 0.81714        | 0.96234          | (Left-Caudate)(Left-Putamen)(lh.supramarginal_1)                                         |
| 0        | 1.00E-05        | 0.61538        | 0.82845          | (Left-Thalamus-Proper)(lh.superiorparietal_2)                                            |
| 0        | 1.00E-05        | 0.61538        | 0.82845          | (Left-Thalamus-Proper)(lh.postcentral_8)(lh.precentral_9)                                |
| 0        | 1.00E-05        | 0.61714        | 0.82845          | (Right-Caudate)(Right-Putamen)(Right-Thalamus-Proper)(rh.precentral_11)(rh.precentral_7) |
| 0        | 1.00E-05        | 0.65143        | 0.85356          | (Right-Thalamus-Proper)(rh.precentral_11)(rh.precentral_7)                               |
| 0        | 1.00E-05        | 0.66286        | 0.86192          | (Right-Putamen)(Right-Thalamus-Proper)(rh.insula_1)(rh.insula_2)(rh.precentral_7)        |
| 0        | 1.00E-05        | 0.76923        | 0.93305          | (Left-Caudate)(Left-Thalamus-Proper)(lh.supramarginal_1)                                 |
| 0        | 1.00E-05        | 0.73143        | 0.90795          | (Left-Caudate)(Left-Putamen)(Left-Thalamus-Proper)(lh.insula_1)(lh.supramarginal_1)      |
| 0        | 1.00E-05        | 0.72527        | 0.90377          | (Right-Thalamus-Proper)(rh.precentral_7)                                                 |
| 0        | 1.00E-05        | 0.67033        | 0.86192          | (Right-Thalamus-Proper)(rh.insula_1)(rh.insula_2)(rh.precentral_7)                       |
| 0        | 1.00E-05        | 0.73626        | 0.90795          | (Right-Caudate)(rh.superiorparietal_1)(rh.supramarginal_9)                               |
| 0        | 1.00E-05        | 0.72527        | 0.89958          | (Left-Thalamus-Proper)(lh.caudalmiddlefrontal_3)                                         |
| 0        | 1.00E-05        | 0.64571        | 0.841            | (Right-Putamen)(Right-Thalamus-Proper)(rh.precentral_11)(rh.precentral_7)                |
| 0        | 1.00E-05        | 0.7033         | 0.88285          | (rh.bankssts_2)(rh.fusiform_5)                                                           |
| 1.00E-05 | 1.00E-05        | 0.60571        | 0.80753          | (Right-Caudate)(Right-Hippocampus)(rh.superiorparietal_1)                                |
| 1.00E-05 | 1.00E-05        | 0.62857        | 0.82427          | (Right-Putamen)(Right-Thalamus-Proper)(rh.insula_1)(rh.superiorparietal_1)               |
| 1.00E-05 | 1.00E-05        | 0.63429        | 0.82845          | (Right-Thalamus-Proper)(rh.insula_1)(rh.superiorparietal_1)                              |
| 1.00E-05 | 1.00E-05        | 0.71429        | 0.88703          | (Left-Caudate)(lh.postcentral_8)(lh.precentral_9)                                        |
| 1.00E-05 | 1.00E-05        | 0.68571        | 0.86611          | (Right-Caudate)(Right-Thalamus-Proper)(rh.precentral_13)(rh.precentral_7)                |
| 1.00E-05 | 1.00E-05        | 0.68571        | 0.86611          | (Right-Caudate)(Right-Putamen)(Right-Thalamus-Proper)(rh.precentral_13)(rh.precentral_7) |
| 1.00E-05 | 1.00E-05        | 0.85143        | 0.97071          | (Left-Caudate)(lh.supramarginal_1)                                                       |

|          |          |         |         |                                                                                              |
|----------|----------|---------|---------|----------------------------------------------------------------------------------------------|
| 1.00E-05 | 1.00E-05 | 0.63429 | 0.82427 | (Right-Thalamus-Propert)(rh.precentral_11)(rh.precentral_13)(rh.precentral_7)                |
| 1.00E-05 | 1.00E-05 | 0.65143 | 0.83682 | (Right-Caudate)(Right-Pallidum)(Right-Thalamus-Propert)(rh.precentral_7)                     |
| 1.00E-05 | 1.00E-05 | 0.65143 | 0.83682 | (Right-Caudate)(Right-Pallidum)(Right-Putamen)(Right-Thalamus-Propert)(rh.precentral_7)      |
| 1.00E-05 | 1.00E-05 | 0.65714 | 0.841   | (Right-Putamen)(Right-Thalamus-Propert)(rh.superiorparietal_1)                               |
| 2.00E-05 | 1.00E-05 | 0.69714 | 0.87029 | (Right-Thalamus-Propert)(rh.precentral_13)(rh.precentral_7)                                  |
| 2.00E-05 | 1.00E-05 | 0.69714 | 0.87029 | (Left-Pallidum)(Left-Thalamus-Propert)(lh.caudalmiddlefrontal_3)                             |
| 2.00E-05 | 1.00E-05 | 0.69714 | 0.87029 | (Left-Pallidum)(Left-Putamen)(Left-Thalamus-Propert)(lh.caudalmiddlefrontal_3)               |
| 2.00E-05 | 1.00E-05 | 0.69714 | 0.87029 | (Left-Caudate)(Left-Pallidum)(Left-Thalamus-Propert)(lh.caudalmiddlefrontal_3)               |
| 2.00E-05 | 1.00E-05 | 0.69714 | 0.87029 | (Right-Putamen)(Right-Thalamus-Propert)(rh.precentral_13)(rh.precentral_7)                   |
| 2.00E-05 | 1.00E-05 | 0.69714 | 0.87029 | (Left-Caudate)(Left-Pallidum)(Left-Putamen)(Left-Thalamus-Propert)(lh.caudalmiddlefrontal_3) |
| 2.00E-05 | 1.00E-05 | 0.62637 | 0.8159  | (lh.postcentral_14)(lh.precentral_14)                                                        |
| 2.00E-05 | 1.00E-05 | 0.63736 | 0.82427 | (rh.precentral_1)(rh.supramarginal_9)                                                        |
| 2.00E-05 | 1.00E-05 | 0.81143 | 0.94561 | (Left-Caudate)(Left-Putamen)(lh.insula_1)(lh.supramarginal_1)                                |
| 2.00E-05 | 1.00E-05 | 0.65714 | 0.83682 | (Right-Pallidum)(Right-Thalamus-Propert)(rh.precentral_7)                                    |
| 2.00E-05 | 1.00E-05 | 0.65714 | 0.83682 | (Right-Pallidum)(Right-Putamen)(Right-Thalamus-Propert)(rh.precentral_7)                     |
| 2.00E-05 | 1.00E-05 | 0.78022 | 0.92469 | (Right-Caudate)(rh.superiorparietal_1)                                                       |
| 3.00E-05 | 1.00E-05 | 0.79429 | 0.93305 | (Right-Caudate)(rh.precentral_15)                                                            |
| 3.00E-05 | 1.00E-05 | 0.76923 | 0.91632 | (Left-Caudate)(Left-Thalamus-Propert)(lh.insula_1)(lh.supramarginal_1)                       |
| 3.00E-05 | 1.00E-05 | 0.65934 | 0.83682 | (lh.paracentral_3)(lh.precentral_4)                                                          |
| 4.00E-05 | 1.00E-05 | 0.74725 | 0.89958 | (lh.precuneus_10)(lh.superiorparietal_5)                                                     |
| 4.00E-05 | 1.00E-05 | 0.74857 | 0.89958 | (Left-Caudate)(Left-Thalamus-Propert)(lh.caudalmiddlefrontal_3)                              |
| 4.00E-05 | 1.00E-05 | 0.74857 | 0.89958 | (Left-Putamen)(Left-Thalamus-Propert)(lh.caudalmiddlefrontal_3)                              |
| 4.00E-05 | 1.00E-05 | 0.74857 | 0.89958 | (Left-Caudate)(Left-Putamen)(Left-Thalamus-Propert)(lh.caudalmiddlefrontal_3)                |
| 5.00E-05 | 1.00E-05 | 0.69231 | 0.85774 | (Left-Thalamus-Propert)(lh.supramarginal_9)                                                  |
| 7.00E-05 | 1.00E-05 | 0.67429 | 0.841   | (Left-Thalamus-Propert)(lh.insula_1)(lh.supramarginal_9)                                     |
| 9.00E-05 | 1.00E-05 | 0.65143 | 0.82008 | (Left-Caudate)(Left-Hippocampus)(Left-Putamen)(lh.supramarginal_1)                           |
| 0.0001   | 1.00E-05 | 0.66286 | 0.82845 | (Left-Putamen)(Left-Thalamus-Propert)(lh.postcentral_8)(lh.precentral_9)                     |
| 0.00012  | 1.00E-05 | 0.77143 | 0.90795 | (Left-Caudate)(Left-Thalamus-Propert)(lh.postcentral_3)                                      |
| 0.00013  | 1.00E-05 | 0.7033  | 0.85774 | (Right-Caudate)(rh.precentral_13)(rh.superiorparietal_1)                                     |
| 0.00014  | 1.00E-05 | 0.79121 | 0.9205  | (Right-Caudate)(rh.precentral_13)(rh.precentral_15)                                          |
| 0.00016  | 1.00E-05 | 0.84571 | 0.95397 | (Left-Caudate)(lh.insula_1)(lh.supramarginal_1)                                              |
| 0.00018  | 1.00E-05 | 0.94286 | 1       | (Left-Thalamus-Propert)(lh.precentral_11)                                                    |
| 0.00018  | 1.00E-05 | 0.94286 | 1       | (Left-Caudate)(Left-Thalamus-Propert)(lh.precentral_11)                                      |
| 0.00018  | 1.00E-05 | 0.94286 | 1       | (Left-Putamen)(Left-Thalamus-Propert)(lh.precentral_11)                                      |
| 0.00018  | 1.00E-05 | 0.94286 | 1       | (Left-Caudate)(Left-Putamen)(Left-Thalamus-Propert)(lh.precentral_11)                        |
| 0.00019  | 1.00E-05 | 0.75824 | 0.8954  | (lh.fusiform_2)(lh.fusiform_5)(lh.lingual_8)                                                 |
| 0.00019  | 1.00E-05 | 0.84    | 0.94979 | (Left-Caudate)(Left-Putamen)(Left-Thalamus-Propert)(lh.postcentral_8)                        |
| 0.0002   | 1.00E-05 | 0.64    | 0.80335 | (Left-Putamen)(lh.precentral_16)(lh.supramarginal_1)                                         |
| 0.0002   | 1.00E-05 | 0.69231 | 0.84519 | (Left-Thalamus-Propert)(lh.supramarginal_4)                                                  |
| 0.0003   | 1.00E-05 | 0.67033 | 0.82427 | (Right-Thalamus-Propert)(rh.superiorparietal_1)(rh.supramarginal_9)                          |
| 0.00033  | 1.00E-05 | 0.70857 | 0.85356 | (lh.inferiorparietal_5)(lh.inferiorparietal_8)(lh.inferiorparietal_9)                        |
| 0.00034  | 1.00E-05 | 0.71429 | 0.85774 | (lh.bankssts_2)(lh.fusiform_7)(lh.middletemporal_4)                                          |
| 0.00034  | 1.00E-05 | 0.84571 | 0.94979 | (Left-Caudate)(Left-Thalamus-Propert)(lh.postcentral_8)                                      |
| 0.00036  | 1.00E-05 | 0.65714 | 0.81172 | (Left-Caudate)(lh.postcentral_3)(lh.postcentral_8)                                           |
| 0.00039  | 1.00E-05 | 0.92571 | 0.99163 | (Left-Caudate)(Left-Putamen)(lh.postcentral_8)                                               |
| 0.00039  | 1.00E-05 | 0.94857 | 1       | (lh.paracentral_5)(lh.superiorfrontal_14)                                                    |
| 0.00042  | 1.00E-05 | 0.83429 | 0.94142 | (Left-Putamen)(Left-Thalamus-Propert)(lh.supramarginal_1)                                    |
| 0.00042  | 1.00E-05 | 0.83429 | 0.94142 | (Left-Putamen)(Left-Thalamus-Propert)(lh.insula_1)(lh.supramarginal_1)                       |
| 0.00044  | 1.00E-05 | 0.79121 | 0.91213 | (Left-Putamen)(lh.postcentral_8)(lh.precentral_9)                                            |
| 0.00044  | 1.00E-05 | 0.68571 | 0.83264 | (Left-Hippocampus)(lh.bankssts_3)(lh.insula_2)                                               |

|         |          |         |         |                                                                                                             |
|---------|----------|---------|---------|-------------------------------------------------------------------------------------------------------------|
| 0.00048 | 1.00E-05 | 0.78022 | 0.90377 | (lh.fusiform_2)(lh.fusiform_5)                                                                              |
| 0.00053 | 1.00E-05 | 0.71429 | 0.85356 | (Right-Thalamus-Propor)(rh.superiorparietal_1)                                                              |
| 0.00053 | 1.00E-05 | 0.71429 | 0.85356 | (Left-Putamen)(lh.postcentral_14)(lh.supramarginal_1)                                                       |
| 0.00054 | 1.00E-05 | 0.72527 | 0.86192 | (Left-Putamen)(lh.postcentral_14)(lh.precentral_16)                                                         |
| 0.00055 | 1.00E-05 | 0.85714 | 0.95397 | (Left-Thalamus-Propor)(lh.supramarginal_1)                                                                  |
| 0.00055 | 1.00E-05 | 0.85714 | 0.95397 | (Left-Thalamus-Propor)(lh.insula_1)(lh.supramarginal_1)                                                     |
| 0.00058 | 1.00E-05 | 0.73714 | 0.87029 | (rh.caudalmiddlefrontal_4)(rh.rostralmiddlefrontal_1)(rh.rostralmiddlefrontal_2)(rh.rostralmiddlefrontal_3) |
| 0.00059 | 1.00E-05 | 0.74286 | 0.87448 | (Left-Caudate)(Left-Putamen)(Left-Thalamus-Propor)(lh.postcentral_8)(lh.precentral_11)                      |
| 0.00061 | 1.00E-05 | 0.76    | 0.88703 | (Left-Caudate)(Left-Putamen)(lh.postcentral_8)(lh.precentral_9)                                             |
| 0.00062 | 1.00E-05 | 0.85143 | 0.94979 | (Left-Putamen)(lh.precentral_16)                                                                            |
| 0.00079 | 2.00E-05 | 0.7033  | 0.841   | (lh.postcentral_14)(lh.supramarginal_9)                                                                     |
| 0.00079 | 2.00E-05 | 0.7033  | 0.841   | (Left-Putamen)(lh.parsopercularis_1)(lh.precentral_16)                                                      |
| 0.00079 | 2.00E-05 | 0.70857 | 0.84519 | (lh.inferiorparietal_5)(lh.inferiorparietal_6)(lh.inferiorparietal_8)                                       |
| 0.0008  | 2.00E-05 | 0.78022 | 0.89958 | (lh.fusiform_1)(lh.fusiform_2)(lh.fusiform_5)                                                               |
| 0.00084 | 2.00E-05 | 0.72527 | 0.85774 | (lh.paracentral_5)(lh.superiorfrontal_14)(lh.superiorfrontal_17)                                            |
| 0.00085 | 2.00E-05 | 0.75824 | 0.88285 | (Left-Thalamus-Propor)(lh.postcentral_8)(lh.precentral_11)                                                  |
| 0.00085 | 2.00E-05 | 0.73626 | 0.86611 | (rh.postcentral_1)(rh.supramarginal_8)                                                                      |
| 0.00086 | 2.00E-05 | 0.74725 | 0.87448 | (lh.fusiform_1)(lh.fusiform_2)(lh.fusiform_5)(lh.lateraloccipital_9)                                        |
| 0.00094 | 2.00E-05 | 0.81143 | 0.9205  | (Left-Thalamus-Propor)(lh.superiorparietal_3)                                                               |
| 0.00096 | 2.00E-05 | 0.74857 | 0.87448 | (Left-Caudate)(Left-Thalamus-Propor)(lh.postcentral_8)(lh.precentral_11)                                    |
| 0.00099 | 2.00E-05 | 0.86286 | 0.95397 | (Left-Caudate)(lh.postcentral_3)                                                                            |
| 0.00101 | 2.00E-05 | 0.78857 | 0.90377 | (Right-Pallidum)(Right-Putamen)(rh.parsopercularis_4)                                                       |
| 0.00101 | 2.00E-05 | 0.77143 | 0.89121 | (Left-Putamen)(lh.postcentral_14)                                                                           |
| 0.00119 | 2.00E-05 | 0.85143 | 0.94561 | (rh.caudalanteriorcingulate_3)(rh.caudalmiddlefrontal_4)                                                    |
| 0.00119 | 2.00E-05 | 0.85143 | 0.94561 | (Right-Caudate)(rh.caudalanteriorcingulate_3)(rh.caudalmiddlefrontal_4)                                     |
| 0.00126 | 2.00E-05 | 0.79121 | 0.90377 | (Right-Pallidum)(rh.parsopercularis_4)                                                                      |
| 0.00126 | 2.00E-05 | 0.79121 | 0.90377 | (Right-Putamen)(rh.precentral_5)(rh.precentral_8)                                                           |
| 0.00128 | 2.00E-05 | 0.84571 | 0.94142 | (Left-Thalamus-Propor)(lh.precentral_11)(lh.precentral_9)                                                   |
| 0.00131 | 2.00E-05 | 0.78022 | 0.8954  | (Left-Hippocampus)(lh.parahippocampal_1)(lh.parahippocampal_2)                                              |
| 0.00134 | 2.00E-05 | 0.76923 | 0.88703 | (rh.fusiform_1)(rh.fusiform_2)(rh.inferiorparietal_10)                                                      |
| 0.00134 | 2.00E-05 | 0.74725 | 0.87029 | (lh.lateraloccipital_3)(lh.lateraloccipital_4)                                                              |
| 0.00135 | 2.00E-05 | 0.75824 | 0.87866 | (lh.fusiform_2)(lh.fusiform_5)(lh.lateraloccipital_9)                                                       |
| 0.00141 | 2.00E-05 | 0.88    | 0.96234 | (Left-Caudate)(lh.caudalanteriorcingulate_2)(lh.posteriorcingulate_1)(lh.posteriorcingulate_2)              |
| 0.00142 | 2.00E-05 | 0.68    | 0.8159  | (Left-Thalamus-Propor)(lh.insula_1)(lh.superiorparietal_5)                                                  |
| 0.00146 | 2.00E-05 | 0.67033 | 0.80753 | (lh.isthmuscingulate_2)(lh.precuneus_10)(lh.superiorparietal_5)                                             |
| 0.0016  | 2.00E-05 | 0.87429 | 0.95816 | (Left-Putamen)(Left-Thalamus-Propor)(lh.postcentral_8)                                                      |
| 0.00163 | 2.00E-05 | 0.69714 | 0.82845 | (lh.paracentral_3)(lh.paracentral_5)(lh.precentral_4)                                                       |
| 0.00164 | 2.00E-05 | 0.78857 | 0.89958 | (Right-Caudate)(Right-Pallidum)(rh.parsopercularis_4)                                                       |
| 0.00166 | 2.00E-05 | 0.69231 | 0.82427 | (Right-Putamen)(rh.postcentral_8)(rh.supramarginal_1)                                                       |
| 0.00169 | 2.00E-05 | 0.93714 | 0.99163 | (Left-Caudate)(lh.postcentral_8)                                                                            |
| 0.00169 | 2.00E-05 | 0.93714 | 0.99163 | (Left-Thalamus-Propor)(lh.insula_1)(lh.precentral_11)                                                       |
| 0.00169 | 2.00E-05 | 0.93714 | 0.99163 | (Left-Putamen)(Left-Thalamus-Propor)(lh.insula_1)(lh.precentral_11)                                         |
| 0.00182 | 2.00E-05 | 0.96    | 1       | (rh.fusiform_1)(rh.fusiform_2)                                                                              |
| 0.00185 | 2.00E-05 | 0.71429 | 0.841   | (lh.isthmuscingulate_2)(lh.superiorparietal_6)                                                              |
| 0.00185 | 2.00E-05 | 0.71429 | 0.841   | (Left-Putamen)(lh.insula_3)(lh.precentral_16)                                                               |
| 0.00191 | 2.00E-05 | 0.89714 | 0.97071 | (Left-Hippocampus)(lh.bankssts_2)                                                                           |
| 0.002   | 2.00E-05 | 0.73626 | 0.85774 | (lh.fusiform_2)(lh.fusiform_5)(lh.lateraloccipital_9)(lh.lingual_8)                                         |
| 0.00205 | 2.00E-05 | 0.79121 | 0.89958 | (lh.precuneus_9)(lh.superiorparietal_11)(lh.superiorparietal_6)                                             |
| 0.00205 | 2.00E-05 | 0.79121 | 0.89958 | (Right-Caudate)(Right-Pallidum)(Right-Putamen)(rh.parsopercularis_4)                                        |
| 0.00209 | 2.00E-05 | 0.75824 | 0.87448 | (lh.fusiform_1)(lh.fusiform_2)(lh.fusiform_5)(lh.lingual_8)                                                 |

|         |          |         |         |                                                                                                |
|---------|----------|---------|---------|------------------------------------------------------------------------------------------------|
| 0.00209 | 2.00E-05 | 0.78022 | 0.89121 | (Left-Caudate)(lh.caudalmiddlefrontal_1)(lh.rostralmiddlefrontal_1)                            |
| 0.00214 | 2.00E-05 | 0.73714 | 0.85774 | (Right-Pallidum)(rh.caudalmiddlefrontal_4)(rh.parsopercularis_4)                               |
| 0.00214 | 2.00E-05 | 0.73714 | 0.85774 | (Right-Pallidum)(Right-Putamen)(rh.caudalmiddlefrontal_4)(rh.parsopercularis_4)                |
| 0.00214 | 2.00E-05 | 0.73714 | 0.85774 | (Right-Caudate)(Right-Pallidum)(rh.caudalmiddlefrontal_4)(rh.parsopercularis_4)                |
| 0.00214 | 2.00E-05 | 0.73714 | 0.85774 | (Right-Caudate)(Right-Pallidum)(Right-Putamen)(rh.caudalmiddlefrontal_4)(rh.parsopercularis_4) |
| 0.00231 | 2.00E-05 | 0.84571 | 0.93724 | (Left-Putamen)(Left-Thalamus-Proper)(lh.precentral_11)(lh.precentral_9)                        |
| 0.00231 | 2.00E-05 | 0.84571 | 0.93724 | (Right-Caudate)(Right-Hippocampus)(Right-Putamen)(Right-Thalamus-Proper)(rh.supramarginal_9)   |
| 0.00251 | 2.00E-05 | 0.77143 | 0.88285 | (Left-Putamen)(Left-Thalamus-Proper)(lh.postcentral_8)(lh.precentral_11)                       |
| 0.00262 | 2.00E-05 | 0.78857 | 0.8954  | (lh.inferiorparietal_5)(lh.lingual_8)                                                          |
| 0.00272 | 3.00E-05 | 0.71429 | 0.83682 | (rh.bankssts_2)(rh.supramarginal_8)                                                            |
| 0.00284 | 3.00E-05 | 0.88    | 0.95816 | (Left-Thalamus-Proper)(lh.postcentral_8)                                                       |
| 0.00286 | 3.00E-05 | 0.72527 | 0.84519 | (rh.lateraloccipital_2)(rh.pericalcarine_4)                                                    |
| 0.00307 | 3.00E-05 | 0.73143 | 0.84937 | (Left-Putamen)(lh.insula_3)(lh.supramarginal_1)                                                |
| 0.00317 | 3.00E-05 | 0.75824 | 0.87029 | (Left-Caudate)(lh.parsopercularis_1)(lh.rostralmiddlefrontal_1)                                |
| 0.00323 | 3.00E-05 | 0.76923 | 0.87866 | (Left-Putamen)(lh.superiorparietal_5)                                                          |
| 0.00323 | 3.00E-05 | 0.76923 | 0.87866 | (Right-Hippocampus)(rh.superiorparietal_1)(rh.supramarginal_9)                                 |
| 0.0033  | 3.00E-05 | 0.74286 | 0.85774 | (lh.precuneus_10)(lh.precuneus_6)(lh.superiorparietal_5)                                       |
| 0.00373 | 3.00E-05 | 0.85714 | 0.94142 | (rh.caudalmiddlefrontal_4)(rh.rostralmiddlefrontal_1)(rh.rostralmiddlefrontal_2)               |
| 0.00388 | 3.00E-05 | 0.85143 | 0.93724 | (Right-Caudate)(Right-Hippocampus)(Right-Thalamus-Proper)(rh.supramarginal_9)                  |
| 0.00393 | 3.00E-05 | 0.71429 | 0.83264 | (Left-Thalamus-Proper)(lh.posteriorcingulate_1)(lh.posteriorcingulate_2)                       |
| 0.00393 | 3.00E-05 | 0.71429 | 0.83264 | (Left-Caudate)(Left-Thalamus-Proper)(lh.posteriorcingulate_1)(lh.posteriorcingulate_2)         |
| 0.00393 | 3.00E-05 | 0.96571 | 1       | (lh.posteriorcingulate_1)(lh.posteriorcingulate_3)                                             |
| 0.00393 | 3.00E-05 | 0.96571 | 1       | (Left-Caudate)(lh.posteriorcingulate_1)(lh.posteriorcingulate_3)                               |
| 0.00401 | 3.00E-05 | 0.84571 | 0.93305 | (Left-Caudate)(Left-Thalamus-Proper)(lh.precentral_11)(lh.precentral_9)                        |
| 0.00419 | 3.00E-05 | 0.8     | 0.89958 | (rh.inferiorparietal_1)(rh.supramarginal_8)                                                    |
| 0.0042  | 3.00E-05 | 0.95429 | 0.99582 | (rh.fusiform_1)(rh.fusiform_2)(rh.lateraloccipital_10)                                         |
| 0.00427 | 3.00E-05 | 0.81714 | 0.91213 | (Left-Caudate)(lh.paracentral_5)(lh.postcentral_3)                                             |
| 0.00436 | 4.00E-05 | 0.73626 | 0.84937 | (Left-Putamen)(lh.insula_1)(lh.postcentral_14)                                                 |
| 0.00436 | 4.00E-05 | 0.73626 | 0.84937 | (rh.caudalmiddlefrontal_5)(rh.rostralmiddlefrontal_1)(rh.rostralmiddlefrontal_2)               |
| 0.00453 | 4.00E-05 | 0.89143 | 0.96234 | (lh.caudalanteriorcingulate_2)(lh.posteriorcingulate_1)(lh.posteriorcingulate_2)               |
| 0.00473 | 4.00E-05 | 0.75824 | 0.86611 | (lh.caudalmiddlefrontal_3)(lh.caudalmiddlefrontal_6)                                           |
| 0.00486 | 4.00E-05 | 0.76923 | 0.87448 | (lh.rostralanteriorcingulate_2)(lh.rostralmiddlefrontal_4)(lh.superiorfrontal_10)              |
| 0.00487 | 4.00E-05 | 0.69231 | 0.81172 | (Left-Thalamus-Proper)(lh.postcentral_8)(lh.precentral_11)(lh.precentral_4)                    |
| 0.00497 | 4.00E-05 | 0.88571 | 0.95816 | (Right-Caudate)(Right-Hippocampus)(Right-Putamen)(rh.supramarginal_9)                          |
| 0.005   | 4.00E-05 | 0.79121 | 0.89121 | (rh.rostralmiddlefrontal_1)(rh.rostralmiddlefrontal_2)(rh.rostralmiddlefrontal_3)              |
| 0.005   | 4.00E-05 | 0.79121 | 0.89121 | (Left-Caudate)(lh.rostralanteriorcingulate_2)(lh.superiorfrontal_10)(lh.superiorfrontal_4)     |
| 0.00533 | 4.00E-05 | 0.70857 | 0.82427 | (lh.precuneus_10)(lh.precuneus_9)(lh.superiorparietal_5)                                       |
| 0.00538 | 5.00E-05 | 0.76    | 0.86611 | (rh.inferiorparietal_1)(rh.inferiorparietal_4)(rh.supramarginal_8)                             |
| 0.00559 | 5.00E-05 | 0.71429 | 0.82845 | (lh.precuneus_6)(lh.superiorparietal_8)                                                        |
| 0.00559 | 5.00E-05 | 0.71429 | 0.82845 | (rh.lateraloccipital_6)(rh.pericalcarine_4)                                                    |
| 0.00571 | 5.00E-05 | 0.87429 | 0.94979 | (rh.bankssts_2)(rh.insula_2)                                                                   |
| 0.00594 | 5.00E-05 | 0.72527 | 0.83682 | (lh.precentral_11)(lh.superiorparietal_3)                                                      |
| 0.00594 | 5.00E-05 | 0.72527 | 0.83682 | (lh.precentral_3)(lh.superiorfrontal_15)                                                       |
| 0.00594 | 5.00E-05 | 0.72527 | 0.83682 | (Right-Thalamus-Proper)(rh.precentral_15)                                                      |
| 0.00594 | 5.00E-05 | 0.72527 | 0.83682 | (Right-Putamen)(rh.precentral_4)                                                               |
| 0.00594 | 5.00E-05 | 0.72527 | 0.83682 | (rh.lateraloccipital_8)(rh.lingual_2)(rh.lingual_4)                                            |
| 0.00594 | 5.00E-05 | 0.72527 | 0.83682 | (rh.fusiform_1)(rh.fusiform_2)(rh.inferiorparietal_10)(rh.lateraloccipital_8)                  |
| 0.00594 | 5.00E-05 | 0.72527 | 0.83682 | (lh.fusiform_1)(lh.fusiform_2)(lh.fusiform_5)(lh.lateraloccipital_9)(lh.lingual_8)             |
| 0.00643 | 6.00E-05 | 0.85714 | 0.93724 | (Left-Pallidum)(lh.caudalmiddlefrontal_3)                                                      |
| 0.00643 | 6.00E-05 | 0.85714 | 0.93724 | (Left-Caudate)(Left-Pallidum)(lh.caudalmiddlefrontal_3)                                        |

|         |          |         |         |                                                                                                     |
|---------|----------|---------|---------|-----------------------------------------------------------------------------------------------------|
| 0.00643 | 6.00E-05 | 0.85714 | 0.93724 | (Left-Pallidum)(Left-Putamen)(lh.caudalmiddlefrontal_3)                                             |
| 0.00643 | 6.00E-05 | 0.85714 | 0.93724 | (Left-Caudate)(Left-Pallidum)(Left-Putamen)(lh.caudalmiddlefrontal_3)                               |
| 0.00665 | 7.00E-05 | 0.81143 | 0.90377 | (rh.isthmuscingulate_1)(rh.superiorparietal_1)                                                      |
| 0.00669 | 7.00E-05 | 0.84571 | 0.92887 | (Left-Caudate)(Left-Putamen)(Left-Thalamus-Proper)(lh.precentral_11)(lh.precentral_9)               |
| 0.00679 | 8.00E-05 | 0.83429 | 0.9205  | (lh.lateraloccipital_3)(lh.lateraloccipital_5)                                                      |
| 0.00687 | 8.00E-05 | 0.93143 | 0.98326 | (Left-Caudate)(lh.precentral_11)(lh.precentral_9)                                                   |
| 0.0069  | 8.00E-05 | 0.75824 | 0.86192 | (lh.paracentral_5)(lh.superiorfrontal_17)                                                           |
| 0.0071  | 9.00E-05 | 0.70286 | 0.8159  | (Left-Caudate)(Left-Putamen)(Left-Thalamus-Proper)(lh.insula_1)(lh.postcentral_8)(lh.precentral_11) |
| 0.00717 | 9.00E-05 | 0.76923 | 0.87029 | (Left-Caudate)(Left-Thalamus-Proper)(lh.postcentral_8)(lh.precentral_4)                             |
| 0.00784 | 0.00013  | 0.71429 | 0.82427 | (Right-Thalamus-Proper)(rh.supramarginal_8)                                                         |
| 0.00784 | 0.00013  | 0.71429 | 0.82427 | (Right-Caudate)(rh.superiorfrontal_11)(rh.superiorfrontal_14)                                       |
| 0.0081  | 0.00014  | 0.76571 | 0.86611 | (Left-Caudate)(Left-Thalamus-Proper)(lh.posteriorcingulate_3)(lh.precentral_11)                     |
| 0.00856 | 0.00018  | 0.97143 | 1       | (Left-Caudate)(lh.posteriorcingulate_1)(lh.posteriorcingulate_2)                                    |
| 0.00859 | 0.00018  | 0.89143 | 0.95816 | (Right-Caudate)(Right-Hippocampus)(rh.supramarginal_9)                                              |
| 0.0089  | 0.00022  | 0.73626 | 0.841   | (lh.bankssts_3)(lh.insula_2)                                                                        |
| 0.0089  | 0.00022  | 0.73626 | 0.841   | (Right-Hippocampus)(rh.fusiform_8)(rh.middletemporal_9)                                             |
| 0.0089  | 0.00023  | 0.73626 | 0.841   | (Left-Caudate)(lh.lateralorbitofrontal_6)(lh.medialorbitofrontal_2)                                 |
| 0.00892 | 0.00023  | 0.96    | 0.99582 | (rh.lateraloccipital_8)(rh.lateraloccipital_9)                                                      |
| 0.00893 | 0.00024  | 0.78286 | 0.87866 | (Left-Thalamus-Proper)(lh.insula_1)(lh.superiorparietal_3)                                          |
| 0.00944 | 0.0004   | 0.73714 | 0.841   | (Left-Putamen)(Left-Thalamus-Proper)(lh.insula_1)(lh.postcentral_8)(lh.precentral_11)               |
| 0.0099  | 0.00143  | 0.75824 | 0.85774 | (lh.inferiorparietal_1)(lh.lingual_6)                                                               |
| 0.0099  | 0.00167  | 0.75824 | 0.85774 | (Right-Putamen)(rh.parsopercularis_2)(rh.precentral_1)                                              |
| 0.0099  | 0.002    | 0.75824 | 0.85774 | (Left-Caudate)(lh.postcentral_8)(lh.precentral_11)(lh.precentral_4)                                 |
| 0.00997 | 0.0025   | 0.87429 | 0.94561 | (Right-Hippocampus)(rh.bankssts_2)(rh.insula_2)                                                     |
| 0.00997 | 0.00333  | 0.87429 | 0.94561 | (Right-Caudate)(Right-Putamen)(Right-Thalamus-Proper)(rh.supramarginal_9)                           |
