# Supplementary material for: The frequent complete subgraphs in the human connectome
Source: PubMed Central journal article supplement (PMC7444532; doi:10.1371/journal.pone.0236883), 2020-08-20
Supplement: pone.0236883.s003.pdf [file pone.0236883.s003.pdf]

| p-value | Holm-Bonferroni | frequency_male | frequency_female |                                                                                                                       |
|---------|-----------------|----------------|------------------|-----------------------------------------------------------------------------------------------------------------------|
| 0       | 1.00E-05        | 0.91429        | 0.66154          | (Left-Putamen)(lh.posteriorcingulate_4)                                                                               |
| 0       | 1.00E-05        | 0.81714        | 0.53556          | (Right-Amygdala)(Right-Caudate)(Right-Pallidum)(rh.insula_2)                                                          |
| 0       | 1.00E-05        | 0.81714        | 0.53556          | (Right-Amygdala)(Right-Caudate)(Right-Pallidum)(Right-Thalamus-Proper)(rh.insula_2)                                   |
| 0       | 1.00E-05        | 0.81714        | 0.53556          | (Right-Amygdala)(Right-Caudate)(Right-Pallidum)(Right-Putamen)(rh.insula_2)                                           |
| 0       | 1.00E-05        | 0.81714        | 0.53556          | (Right-Amygdala)(Right-Caudate)(Right-Pallidum)(Right-Putamen)(Right-Thalamus-Proper)(rh.insula_2)                    |
| 0       | 1.00E-05        | 0.81143        | 0.53138          | (Right-Amygdala)(Right-Caudate)(Right-Hippocampus)(Right-Pallidum)(rh.insula_2)                                       |
| 0       | 1.00E-05        | 0.81143        | 0.53138          | (Right-Amygdala)(Right-Caudate)(Right-Hippocampus)(Right-Pallidum)(Right-Putamen)(rh.insula_2)                        |
| 0       | 1.00E-05        | 0.81143        | 0.53138          | (Right-Amygdala)(Right-Caudate)(Right-Hippocampus)(Right-Pallidum)(Right-Thalamus-Proper)(rh.insula_2)                |
| 0       | 1.00E-05        | 0.81143        | 0.53138          | (Right-Amygdala)(Right-Caudate)(Right-Hippocampus)(Right-Pallidum)(Right-Putamen)(Right-Thalamus-Proper)(rh.insula_2) |
| 0       | 1.00E-05        | 0.86857        | 0.61506          | (Right-Amygdala)(Right-Caudate)(Right-Putamen)(rh.insula_2)                                                           |
| 0       | 1.00E-05        | 0.86857        | 0.61506          | (Right-Amygdala)(Right-Caudate)(Right-Putamen)(Right-Thalamus-Proper)(rh.insula_2)                                    |
| 0       | 1.00E-05        | 0.82857        | 0.56485          | (Right-Caudate)(Right-Pallidum)(rh.insula_2)(rh.precentral_13)                                                        |
| 0       | 1.00E-05        | 0.82857        | 0.56485          | (Right-Caudate)(Right-Pallidum)(Right-Putamen)(rh.insula_2)(rh.precentral_13)                                         |
| 0       | 1.00E-05        | 0.91429        | 0.68201          | (Left-Caudate)(Left-Putamen)(lh.posteriorcingulate_4)                                                                 |
| 0       | 1.00E-05        | 0.86286        | 0.61088          | (Right-Amygdala)(Right-Caudate)(Right-Hippocampus)(rh.insula_2)                                                       |
| 0       | 1.00E-05        | 0.86286        | 0.61088          | (Right-Amygdala)(Right-Caudate)(Right-Hippocampus)(Right-Thalamus-Proper)(rh.insula_2)                                |
| 0       | 1.00E-05        | 0.86286        | 0.61088          | (Right-Amygdala)(Right-Caudate)(Right-Hippocampus)(Right-Putamen)(rh.insula_2)                                        |
| 0       | 1.00E-05        | 0.86286        | 0.61088          | (Right-Amygdala)(Right-Caudate)(Right-Hippocampus)(Right-Putamen)(Right-Thalamus-Proper)(rh.insula_2)                 |
| 0       | 1.00E-05        | 0.94857        | 0.75385          | (Left-Putamen)(lh.paracentral_5)                                                                                      |
| 0       | 1.00E-05        | 0.89714        | 0.67782          | (Right-Caudate)(Right-Hippocampus)(Right-Pallidum)(rh.insula_2)                                                       |
| 0       | 1.00E-05        | 0.89714        | 0.67782          | (Right-Caudate)(Right-Hippocampus)(Right-Pallidum)(Right-Thalamus-Proper)(rh.insula_2)                                |
| 0       | 1.00E-05        | 0.89714        | 0.67782          | (Right-Caudate)(Right-Hippocampus)(Right-Pallidum)(Right-Putamen)(rh.insula_2)                                        |
| 0       | 1.00E-05        | 0.89714        | 0.67782          | (Right-Caudate)(Right-Hippocampus)(Right-Pallidum)(Right-Putamen)(Right-Thalamus-Proper)(rh.insula_2)                 |
| 0       | 1.00E-05        | 0.93714        | 0.73846          | (rh.bankssts_2)(rh.bankssts_3)(rh.superiortemporal_1)                                                                 |
| 0       | 1.00E-05        | 0.90857        | 0.69874          | (Right-Caudate)(Right-Pallidum)(Right-Putamen)(rh.insula_2)                                                           |
| 0       | 1.00E-05        | 0.90857        | 0.69874          | (Right-Caudate)(Right-Pallidum)(Right-Putamen)(Right-Thalamus-Proper)(rh.insula_2)                                    |
| 0       | 1.00E-05        | 0.85714        | 0.6318           | (lh.insula_6)(lh.lateralorbitofrontal_4)(lh.lateralorbitofrontal_6)                                                   |
| 0       | 1.00E-05        | 0.84571        | 0.61925          | (Left-Hippocampus)(lh.isthmuscingulate_2)(lh.precuneus_10)(lh.precuneus_11)                                           |
| 0       | 1.00E-05        | 0.84571        | 0.61925          | (Left-Hippocampus)(lh.isthmuscingulate_2)(lh.isthmuscingulate_3)(lh.precuneus_10)(lh.precuneus_11)                    |
| 0       | 1.00E-05        | 0.85143        | 0.62762          | (Left-Putamen)(lh.insula_6)(lh.lateralorbitofrontal_4)(lh.lateralorbitofrontal_6)                                     |
| 0       | 1.00E-05        | 0.96571        | 0.80335          | (Right-Caudate)(rh.insula_1)(rh.insula_2)                                                                             |
| 0       | 1.00E-05        | 0.96571        | 0.80335          | (Right-Caudate)(Right-Putamen)(rh.insula_1)(rh.insula_2)                                                              |
| 0       | 1.00E-05        | 0.81714        | 0.59231          | (lh.cuneus_3)(lh.lateraloccipital_2)                                                                                  |
| 0       | 1.00E-05        | 0.92571        | 0.73846          | (Left-Putamen)(lh.paracentral_5)(lh.precentral_4)                                                                     |
| 0       | 1.00E-05        | 0.83429        | 0.61506          | (lh.insula_6)(lh.lateralorbitofrontal_4)(lh.lateralorbitofrontal_6)(lh.parstriangularis_3)                            |
| 0       | 1.00E-05        | 0.90857        | 0.71548          | (Right-Caudate)(Right-Putamen)(rh.insula_2)(rh.precentral_13)                                                         |
| 0       | 1.00E-05        | 0.86857        | 0.66154          | (Right-Amygdala)(Right-Caudate)(rh.insula_2)                                                                          |
| 0       | 1.00E-05        | 0.86857        | 0.66154          | (Right-Amygdala)(Right-Caudate)(Right-Thalamus-Proper)(rh.insula_2)                                                   |
| 0       | 1.00E-05        | 0.87429        | 0.66946          | (Left-Caudate)(Left-Putamen)(Left-Thalamus-Proper)(lh.posteriorcingulate_4)                                           |
| 0       | 1.00E-05        | 0.82286        | 0.60669          | (lh.inferiorparietal_3)(lh.inferiorparietal_6)(lh.inferiorparietal_8)                                                 |
| 0       | 1.00E-05        | 0.97714        | 0.83264          | (Right-Caudate)(rh.insula_2)                                                                                          |
| 0       | 1.00E-05        | 0.97714        | 0.83264          | (Right-Caudate)(Right-Thalamus-Proper)(rh.insula_2)                                                                   |
| 0       | 1.00E-05        | 0.97714        | 0.83264          | (Right-Caudate)(Right-Putamen)(rh.insula_2)                                                                           |
| 0       | 1.00E-05        | 0.97714        | 0.83264          | (Right-Caudate)(Right-Putamen)(Right-Thalamus-Proper)(rh.insula_2)                                                    |
| 0       | 1.00E-05        | 0.87429        | 0.67364          | (Left-Putamen)(Left-Thalamus-Proper)(lh.posteriorcingulate_4)                                                         |
| 0       | 1.00E-05        | 0.96571        | 0.81172          | (Right-Caudate)(Right-Hippocampus)(rh.insula_2)                                                                       |
| 0       | 1.00E-05        | 0.96571        | 0.81172          | (Right-Caudate)(Right-Hippocampus)(Right-Putamen)(rh.insula_2)                                                        |
| 0       | 1.00E-05        | 0.96571        | 0.81172          | (Right-Caudate)(Right-Hippocampus)(Right-Thalamus-Proper)(rh.insula_2)                                                |
| 0       | 1.00E-05        | 0.96571        | 0.81172          | (Right-Caudate)(Right-Hippocampus)(Right-Putamen)(Right-Thalamus-Proper)(rh.insula_2)                                 |

|          |          |         |         |                                                                                                                            |
|----------|----------|---------|---------|----------------------------------------------------------------------------------------------------------------------------|
| 0        | 1.00E-05 | 0.84571 | 0.63846 | (lh.fusiform_4)(lh.lingual_8)                                                                                              |
| 0        | 1.00E-05 | 0.84    | 0.63598 | (lh.lateraloccipital_2)(lh.lateraloccipital_6)(lh.superiorparietal_12)                                                     |
| 1.00E-05 | 1.00E-05 | 0.95429 | 0.79916 | (Right-Caudate)(Right-Thalamus-Proper)(rh.insula_1)(rh.insula_2)                                                           |
| 1.00E-05 | 1.00E-05 | 0.95429 | 0.79916 | (Right-Caudate)(Right-Putamen)(Right-Thalamus-Proper)(rh.insula_1)(rh.insula_2)                                            |
| 1.00E-05 | 1.00E-05 | 0.90857 | 0.73077 | (Right-Caudate)(Right-Pallidum)(rh.insula_2)                                                                               |
| 1.00E-05 | 1.00E-05 | 0.90857 | 0.73077 | (Right-Caudate)(Right-Pallidum)(Right-Thalamus-Proper)(rh.insula_2)                                                        |
| 1.00E-05 | 1.00E-05 | 0.81714 | 0.61088 | (rh.precuneus_5)(rh.superiorparietal_10)(rh.superiorparietal_9)                                                            |
| 1.00E-05 | 1.00E-05 | 0.89714 | 0.71548 | (lh.fusiform_2)(lh.lateraloccipital_6)(lh.lateraloccipital_7)(lh.lingual_1)(lh.pericalcarine_3)                            |
| 1.00E-05 | 1.00E-05 | 0.87429 | 0.68462 | (Left-Putamen)(lh.paracentral_5)(lh.superiorfrontal_14)                                                                    |
| 1.00E-05 | 1.00E-05 | 0.88571 | 0.70293 | (Right-Caudate)(Right-Putamen)(Right-Thalamus-Proper)(rh.insula_2)(rh.precentral_13)                                       |
| 1.00E-05 | 1.00E-05 | 0.81714 | 0.61506 | (lh.fusiform_5)(lh.fusiform_7)(lh.inferiortemporal_6)                                                                      |
| 1.00E-05 | 1.00E-05 | 0.90857 | 0.73846 | (lh.precentral_11)(lh.precentral_16)                                                                                       |
| 1.00E-05 | 1.00E-05 | 0.90857 | 0.73846 | (Right-Caudate)(rh.insula_2)(rh.precentral_13)                                                                             |
| 1.00E-05 | 1.00E-05 | 0.81714 | 0.61925 | (lh.bankssts_3)(lh.inferiortemporal_7)(lh.inferiortemporal_8)                                                              |
| 1.00E-05 | 1.00E-05 | 0.85714 | 0.66946 | (lh.rostralmiddlefrontal_12)(lh.rostralmiddlefrontal_9)(lh.superiorfrontal_2)(lh.superiorfrontal_3)                        |
| 1.00E-05 | 1.00E-05 | 0.85714 | 0.66946 | (rh.bankssts_2)(rh.bankssts_3)(rh.superiortemporal_1)(rh.superiortemporal_3)                                               |
| 1.00E-05 | 1.00E-05 | 0.89714 | 0.72308 | (lh.caudalmiddlefrontal_3)(lh.caudalmiddlefrontal_4)(lh.insula_6)                                                          |
| 1.00E-05 | 1.00E-05 | 0.88    | 0.7     | (lh.lateralorbitofrontal_6)(lh.rostralmiddlefrontal_11)(lh.rostralmiddlefrontal_9)                                         |
| 2.00E-05 | 1.00E-05 | 0.90857 | 0.74059 | (Left-Putamen)(lh.caudalmiddlefrontal_4)(lh.insula_6)                                                                      |
| 2.00E-05 | 1.00E-05 | 0.86857 | 0.68619 | (rh.paracentral_6)(rh.precuneus_10)(rh.superiorparietal_7)                                                                 |
| 2.00E-05 | 1.00E-05 | 0.93714 | 0.78462 | (Left-Hippocampus)(lh.fusiform_4)                                                                                          |
| 2.00E-05 | 1.00E-05 | 0.89143 | 0.71967 | (Left-Putamen)(lh.caudalmiddlefrontal_3)(lh.caudalmiddlefrontal_4)(lh.insula_6)                                            |
| 2.00E-05 | 1.00E-05 | 0.93143 | 0.77824 | (lh.lateraloccipital_7)(lh.precuneus_11)                                                                                   |
| 3.00E-05 | 1.00E-05 | 0.87429 | 0.69874 | (lh.rostralmiddlefrontal_12)(lh.superiorfrontal_1)(lh.superiorfrontal_2)(lh.superiorfrontal_3)                             |
| 3.00E-05 | 1.00E-05 | 0.90857 | 0.74615 | (lh.superiortemporal_2)(lh.supramarginal_6)                                                                                |
| 3.00E-05 | 1.00E-05 | 0.90857 | 0.74615 | (lh.caudalmiddlefrontal_4)(lh.insula_6)                                                                                    |
| 3.00E-05 | 1.00E-05 | 0.85714 | 0.67692 | (lh.lateralorbitofrontal_6)(lh.parstriangularis_2)(lh.rostralmiddlefrontal_12)                                             |
| 3.00E-05 | 1.00E-05 | 0.89714 | 0.73077 | (Left-Pallidum)(lh.posteriorcingulate_3)(lh.precentral_4)                                                                  |
| 3.00E-05 | 1.00E-05 | 0.85714 | 0.67782 | (lh.lateralorbitofrontal_6)(lh.parstriangularis_2)(lh.parstriangularis_3)(lh.rostralmiddlefrontal_12)                      |
| 3.00E-05 | 1.00E-05 | 0.88571 | 0.71548 | (Left-Putamen)(lh.paracentral_5)(lh.postcentral_3)                                                                         |
| 3.00E-05 | 1.00E-05 | 0.88571 | 0.71548 | (Left-Hippocampus)(lh.precuneus_10)(lh.precuneus_11)                                                                       |
| 3.00E-05 | 1.00E-05 | 0.88571 | 0.71548 | (Left-Hippocampus)(lh.isthmuscingulate_3)(lh.precuneus_10)(lh.precuneus_11)                                                |
| 3.00E-05 | 1.00E-05 | 0.89143 | 0.72385 | (Left-Putamen)(lh.insula_6)(lh.lateralorbitofrontal_4)                                                                     |
| 3.00E-05 | 1.00E-05 | 0.84    | 0.6569  | (rh.paracentral_6)(rh.superiorparietal_2)(rh.superiorparietal_7)                                                           |
| 3.00E-05 | 1.00E-05 | 0.94286 | 0.79916 | (rh.rostralmiddlefrontal_11)(rh.rostralmiddlefrontal_12)(rh.rostralmiddlefrontal_8)                                        |
| 4.00E-05 | 1.00E-05 | 0.87429 | 0.70293 | (lh.rostralmiddlefrontal_12)(lh.superiorfrontal_1)(lh.superiorfrontal_2)                                                   |
| 4.00E-05 | 1.00E-05 | 0.85143 | 0.67364 | (lh.parstriangularis_2)(lh.rostralmiddlefrontal_12)(lh.rostralmiddlefrontal_9)                                             |
| 4.00E-05 | 1.00E-05 | 0.85143 | 0.67364 | (lh.parstriangularis_2)(lh.parstriangularis_3)(lh.rostralmiddlefrontal_12)(lh.rostralmiddlefrontal_9)                      |
| 4.00E-05 | 1.00E-05 | 0.88    | 0.7113  | (rh.rostralmiddlefrontal_11)(rh.rostralmiddlefrontal_8)(rh.superiorfrontal_1)(rh.superiorfrontal_2)                        |
| 4.00E-05 | 1.00E-05 | 0.81714 | 0.6318  | (Right-Caudate)(rh.lateralorbitofrontal_4)(rh.lateralorbitofrontal_5)(rh.lateralorbitofrontal_7)(rh.medialorbitofrontal_2) |
| 4.00E-05 | 1.00E-05 | 0.85714 | 0.68201 | (Left-Putamen)(lh.paracentral_5)(lh.posteriorcingulate_3)                                                                  |
| 4.00E-05 | 1.00E-05 | 0.88571 | 0.71967 | (Left-Caudate)(lh.caudalmiddlefrontal_4)(lh.insula_6)                                                                      |
| 4.00E-05 | 1.00E-05 | 0.88571 | 0.71967 | (Left-Caudate)(Left-Putamen)(lh.caudalmiddlefrontal_4)(lh.insula_6)                                                        |
| 5.00E-05 | 1.00E-05 | 0.86286 | 0.69038 | (lh.insula_6)(lh.lateralorbitofrontal_4)(lh.parstriangularis_3)                                                            |
| 5.00E-05 | 1.00E-05 | 0.84571 | 0.66923 | (rh.inferiorparietal_1)(rh.superiorparietal_1)(rh.superiorparietal_10)(rh.superiorparietal_7)                              |
| 5.00E-05 | 1.00E-05 | 0.90286 | 0.74477 | (lh.rostralmiddlefrontal_12)(lh.superiorfrontal_2)(lh.superiorfrontal_3)                                                   |
| 5.00E-05 | 1.00E-05 | 0.92    | 0.76923 | (lh.bankssts_3)(lh.inferiortemporal_8)                                                                                     |
| 5.00E-05 | 1.00E-05 | 0.97714 | 0.86192 | (rh.inferiorparietal_12)(rh.inferiorparietal_7)                                                                            |
| 5.00E-05 | 1.00E-05 | 0.86857 | 0.69874 | (Left-Caudate)(lh.caudalmiddlefrontal_3)(lh.caudalmiddlefrontal_4)(lh.insula_6)                                            |
| 5.00E-05 | 1.00E-05 | 0.86857 | 0.69874 | (rh.rostralmiddlefrontal_10)(rh.rostralmiddlefrontal_8)(rh.superiorfrontal_1)(rh.superiorfrontal_2)                        |

|          |          |         |         |                                                                                                                                 |
|----------|----------|---------|---------|---------------------------------------------------------------------------------------------------------------------------------|
| 5.00E-05 | 1.00E-05 | 0.86857 | 0.69874 | (Left-Caudate)(Left-Putamen)(lh.caudalmiddlefrontal_3)(lh.caudalmiddlefrontal_4)(lh.insula_6)                                   |
| 5.00E-05 | 1.00E-05 | 0.86286 | 0.69231 | (Left-Putamen)(lh.paracentral_5)(lh.superiorfrontal_12)                                                                         |
| 5.00E-05 | 1.00E-05 | 0.86286 | 0.69231 | (rh.inferiortemporal_5)(rh.middletemporal_2)(rh.middletemporal_4)                                                               |
| 5.00E-05 | 1.00E-05 | 0.86857 | 0.7     | (lh.parstriangularis_2)(lh.rostralmiddlefrontal_12)                                                                             |
| 6.00E-05 | 1.00E-05 | 0.89714 | 0.73846 | (rh.rostralmiddlefrontal_11)(rh.rostralmiddlefrontal_8)(rh.superiorfrontal_1)                                                   |
| 6.00E-05 | 1.00E-05 | 0.89143 | 0.73077 | (Left-Hippocampus)(lh.isthmuscingulate_2)(lh.precuneus_10)                                                                      |
| 6.00E-05 | 1.00E-05 | 0.89143 | 0.73077 | (Left-Hippocampus)(lh.isthmuscingulate_2)(lh.isthmuscingulate_3)(lh.precuneus_10)                                               |
| 6.00E-05 | 1.00E-05 | 0.88571 | 0.72308 | (Right-Caudate)(Right-Thalamus-Proper)(rh.insula_2)(rh.precentral_13)                                                           |
| 6.00E-05 | 1.00E-05 | 0.83429 | 0.6569  | (Left-Putamen)(lh.insula_1)(lh.insula_2)(lh.insula_3)(lh.precentral_11)                                                         |
| 6.00E-05 | 1.00E-05 | 0.84    | 0.66527 | (lh.lingual_6)(lh.lingual_8)(lh.pericalcarine_3)(lh.precuneus_11)                                                               |
| 7.00E-05 | 1.00E-05 | 0.93714 | 0.79916 | (lh.postcentral_8)(lh.postcentral_9)                                                                                            |
| 8.00E-05 | 1.00E-05 | 0.92    | 0.77406 | (lh.inferiorparietal_3)(lh.inferiorparietal_8)                                                                                  |
| 8.00E-05 | 1.00E-05 | 0.85143 | 0.68201 | (Right-Caudate)(rh.lateralorbitofrontal_4)(rh.lateralorbitofrontal_5)(rh.medialorbitofrontal_2)                                 |
| 8.00E-05 | 1.00E-05 | 0.82857 | 0.65385 | (lh.cuneus_1)(lh.lateraloccipital_6)                                                                                            |
| 8.00E-05 | 1.00E-05 | 0.83429 | 0.66109 | (rh.inferiorparietal_6)(rh.inferiorparietal_7)(rh.inferiorparietal_8)                                                           |
| 8.00E-05 | 1.00E-05 | 0.81714 | 0.64017 | (rh.supramarginal_5)(rh.supramarginal_8)(rh.supramarginal_9)                                                                    |
| 8.00E-05 | 1.00E-05 | 0.83429 | 0.66154 | (lh.insula_1)(lh.insula_2)(lh.insula_3)(lh.precentral_11)                                                                       |
| 8.00E-05 | 1.00E-05 | 0.83429 | 0.66154 | (Right-Pallidum)(Right-Thalamus-Proper)(rh.insula_2)(rh.precentral_13)                                                          |
| 8.00E-05 | 1.00E-05 | 0.83429 | 0.66154 | (Right-Pallidum)(Right-Putamen)(Right-Thalamus-Proper)(rh.insula_2)(rh.precentral_13)                                           |
| 9.00E-05 | 1.00E-05 | 0.85714 | 0.69038 | (lh.medialorbitofrontal_1)(lh.superiorfrontal_1)(lh.superiorfrontal_3)                                                          |
| 9.00E-05 | 1.00E-05 | 0.97143 | 0.85774 | (Left-Accumbens-area)(Left-Caudate)(lh.medialorbitofrontal_5)                                                                   |
| 9.00E-05 | 1.00E-05 | 0.92571 | 0.78462 | (lh.parstriangularis_2)(lh.rostralmiddlefrontal_6)                                                                              |
| 9.00E-05 | 1.00E-05 | 0.89143 | 0.7364  | (Left-Hippocampus)(lh.lingual_6)(lh.lingual_8)(lh.precuneus_11)                                                                 |
| 9.00E-05 | 1.00E-05 | 0.84571 | 0.67692 | (Right-Pallidum)(rh.insula_2)(rh.precentral_13)                                                                                 |
| 9.00E-05 | 1.00E-05 | 0.84571 | 0.67692 | (Right-Pallidum)(Right-Putamen)(rh.insula_2)(rh.precentral_13)                                                                  |
| 9.00E-05 | 1.00E-05 | 0.86286 | 0.69874 | (lh.lateralorbitofrontal_6)(lh.parstriangularis_2)(lh.parstriangularis_3)(lh.rostralmiddlefrontal_6)(lh.rostralmiddlefrontal_9) |
| 0.0001   | 1.00E-05 | 0.89714 | 0.74477 | (lh.precentral_11)(lh.precentral_14)(lh.precentral_16)                                                                          |
| 0.0001   | 1.00E-05 | 0.92    | 0.77692 | (lh.fusiform_2)(lh.lateraloccipital_6)(lh.lateraloccipital_7)(lh.lingual_1)                                                     |
| 0.0001   | 1.00E-05 | 0.85714 | 0.69231 | (lh.inferiorparietal_2)(lh.inferiorparietal_3)(lh.inferiorparietal_8)                                                           |
| 0.0001   | 1.00E-05 | 0.86857 | 0.70711 | (lh.parstriangularis_2)(lh.parstriangularis_3)(lh.rostralmiddlefrontal_12)                                                      |
| 0.00011  | 1.00E-05 | 0.93714 | 0.80335 | (rh.cuneus_2)(rh.cuneus_3)                                                                                                      |
| 0.00011  | 1.00E-05 | 0.96571 | 0.84937 | (Right-Caudate)(rh.lateralorbitofrontal_4)(rh.lateralorbitofrontal_5)                                                           |
| 0.00011  | 1.00E-05 | 0.90286 | 0.75385 | (Right-Accumbens-area)(rh.medialorbitofrontal_5)                                                                                |
| 0.00011  | 1.00E-05 | 0.87429 | 0.71548 | (Right-Accumbens-area)(Right-Caudate)(rh.medialorbitofrontal_5)                                                                 |
| 0.00011  | 1.00E-05 | 0.89714 | 0.74615 | (lh.lateralorbitofrontal_6)(lh.parstriangularis_2)(lh.rostralmiddlefrontal_6)                                                   |
| 0.00011  | 1.00E-05 | 0.88571 | 0.73077 | (lh.insula_1)(lh.insula_2)(lh.insula_3)                                                                                         |
| 0.00011  | 1.00E-05 | 0.88571 | 0.73077 | (rh.lateralorbitofrontal_7)(rh.rostralmiddlefrontal_11)(rh.rostralmiddlefrontal_12)(rh.rostralmiddlefrontal_8)                  |
| 0.00011  | 1.00E-05 | 0.89143 | 0.73846 | (lh.insula_6)(lh.lateralorbitofrontal_4)                                                                                        |
| 0.00011  | 1.00E-05 | 0.83429 | 0.66527 | (rh.supramarginal_3)(rh.supramarginal_5)(rh.supramarginal_8)                                                                    |
| 0.00012  | 1.00E-05 | 0.81143 | 0.63846 | (rh.bankssts_3)(rh.superiortemporal_1)(rh.superiortemporal_2)                                                                   |
| 0.00012  | 1.00E-05 | 0.88571 | 0.73222 | (lh.parstriangularis_2)(lh.parstriangularis_3)(lh.rostralmiddlefrontal_6)(lh.rostralmiddlefrontal_9)                            |
| 0.00013  | 1.00E-05 | 0.82286 | 0.65272 | (rh.insula_2)(rh.insula_3)(rh.insula_7)                                                                                         |
| 0.00013  | 1.00E-05 | 0.82286 | 0.65272 | (Right-Putamen)(rh.insula_2)(rh.insula_3)(rh.insula_7)                                                                          |
| 0.00013  | 1.00E-05 | 0.98286 | 0.88285 | (rh.inferiorparietal_1)(rh.superiorparietal_1)(rh.superiorparietal_7)                                                           |
| 0.00013  | 1.00E-05 | 0.95429 | 0.83264 | (rh.inferiorparietal_12)(rh.inferiorparietal_7)(rh.inferiorparietal_8)                                                          |
| 0.00014  | 1.00E-05 | 0.86857 | 0.7113  | (lh.cuneus_2)(lh.pericalcarine_1)(lh.pericalcarine_3)                                                                           |
| 0.00015  | 1.00E-05 | 0.94286 | 0.8159  | (Right-Putamen)(rh.precentral_12)                                                                                               |
| 0.00016  | 1.00E-05 | 0.92571 | 0.79079 | (Left-Hippocampus)(lh.fusiform_4)(lh.fusiform_5)                                                                                |
| 0.00016  | 1.00E-05 | 0.81714 | 0.64854 | (lh.medialorbitofrontal_1)(lh.rostralmiddlefrontal_12)(lh.superiorfrontal_1)(lh.superiorfrontal_3)                              |
| 0.00017  | 1.00E-05 | 0.88    | 0.72803 | (lh.lateraloccipital_7)(lh.pericalcarine_3)(lh.precuneus_11)                                                                    |

|         |          |         |         |                                                                                                                                      |
|---------|----------|---------|---------|--------------------------------------------------------------------------------------------------------------------------------------|
| 0.00017 | 1.00E-05 | 0.97714 | 0.87448 | (lh.lateraloccipital_2)(lh.superiorparietal_12)                                                                                      |
| 0.00017 | 1.00E-05 | 0.84571 | 0.68462 | (rh.precentral_1)(rh.precentral_5)                                                                                                   |
| 0.00018 | 1.00E-05 | 0.84    | 0.67782 | (Left-Caudate)(Left-Putamen)(lh.paracentral_5)(lh.posteriorcingulate_3)                                                              |
| 0.00018 | 1.00E-05 | 0.84    | 0.67782 | (Left-Putamen)(lh.insula_6)(lh.lateralorbitofrontal_4)(lh.parstriangularis_3)                                                        |
| 0.00018 | 1.00E-05 | 0.82286 | 0.6569  | (Left-Putamen)(lh.insula_6)(lh.lateralorbitofrontal_4)(lh.rostralmiddlefrontal_9)                                                    |
| 0.00018 | 1.00E-05 | 0.85143 | 0.69231 | (rh.fusiform_1)(rh.pericalcarine_1)(rh.pericalcarine_3)                                                                              |
| 0.00018 | 1.00E-05 | 0.92571 | 0.79231 | (rh.lateraloccipital_3)(rh.precuneus_1)(rh.superiorparietal_11)                                                                      |
| 0.00019 | 1.00E-05 | 0.86286 | 0.70711 | (lh.lingual_8)(lh.pericalcarine_3)(lh.precuneus_11)                                                                                  |
| 0.00019 | 1.00E-05 | 0.86286 | 0.70711 | (Right-Hippocampus)(rh.isthmuscingulate_2)(rh.precuneus_2)(rh.precuneus_3)                                                           |
| 0.00019 | 1.00E-05 | 0.86286 | 0.70711 | (rh.lateralorbitofrontal_4)(rh.lateralorbitofrontal_5)(rh.lateralorbitofrontal_7)(rh.medialorbitofrontal_2)                          |
| 0.0002  | 1.00E-05 | 0.86857 | 0.71538 | (lh.fusiform_5)(lh.inferiortemporal_6)                                                                                               |
| 0.0002  | 1.00E-05 | 0.86857 | 0.71538 | (lh.inferiorparietal_6)(lh.superiortemporal_2)                                                                                       |
| 0.00021 | 1.00E-05 | 0.90857 | 0.76923 | (lh.lateraloccipital_6)(lh.lateraloccipital_7)(lh.lingual_1)(lh.pericalcarine_3)                                                     |
| 0.00021 | 1.00E-05 | 0.87429 | 0.72308 | (rh.superiorparietal_10)(rh.superiorparietal_9)                                                                                      |
| 0.00021 | 1.00E-05 | 0.87429 | 0.72308 | (Left-Putamen)(lh.postcentral_3)(lh.precentral_4)                                                                                    |
| 0.00021 | 1.00E-05 | 0.88    | 0.73077 | (rh.rostralmiddlefrontal_10)(rh.rostralmiddlefrontal_8)(rh.superiorfrontal_1)                                                        |
| 0.00021 | 1.00E-05 | 0.88    | 0.73077 | (rh.isthmuscingulate_2)(rh.precuneus_2)(rh.precuneus_3)                                                                              |
| 0.00021 | 1.00E-05 | 0.88    | 0.73077 | (Left-Putamen)(lh.postcentral_3)(lh.superiorparietal_3)                                                                              |
| 0.00021 | 1.00E-05 | 0.89714 | 0.75385 | (rh.precuneus_1)(rh.superiorparietal_11)(rh.superiorparietal_13)                                                                     |
| 0.00022 | 1.00E-05 | 0.90857 | 0.76987 | (Left-Caudate)(Left-Putamen)(lh.paracentral_5)(lh.precentral_4)                                                                      |
| 0.00022 | 1.00E-05 | 0.91429 | 0.77824 | (Left-Putamen)(Left-Thalamus-Proper)(lh.paracentral_5)                                                                               |
| 0.00023 | 1.00E-05 | 0.83429 | 0.67364 | (lh.rostralmiddlefrontal_12)(lh.superiorfrontal_2)(lh.superiorfrontal_3)(lh.superiorfrontal_4)                                       |
| 0.00023 | 1.00E-05 | 0.92    | 0.78661 | (rh.precuneus_1)(rh.superiorparietal_13)                                                                                             |
| 0.00023 | 1.00E-05 | 0.93143 | 0.80335 | (rh.middletemporal_2)(rh.middletemporal_6)                                                                                           |
| 0.00023 | 1.00E-05 | 0.93143 | 0.80335 | (Left-Caudate)(Left-Putamen)(lh.paracentral_5)                                                                                       |
| 0.00024 | 1.00E-05 | 0.85714 | 0.70293 | (lh.fusiform_2)(lh.lateraloccipital_6)(lh.lingual_1)(lh.pericalcarine_2)(lh.pericalcarine_3)                                         |
| 0.00025 | 1.00E-05 | 0.84    | 0.68201 | (rh.lateralorbitofrontal_2)(rh.lateralorbitofrontal_6)(rh.parsorbitalis_1)(rh.parstriangularis_1)                                    |
| 0.00025 | 1.00E-05 | 0.82286 | 0.66109 | (lh.insula_6)(lh.lateralorbitofrontal_4)(lh.rostralmiddlefrontal_9)                                                                  |
| 0.00028 | 1.00E-05 | 0.82857 | 0.66946 | (Left-Caudate)(lh.lateralorbitofrontal_2)(lh.lateralorbitofrontal_7)(lh.medialorbitofrontal_2)(lh.rostralanteriorcingulate_1)        |
| 0.00028 | 1.00E-05 | 0.89714 | 0.75732 | (Left-Caudate)(Left-Pallidum)(lh.posteriorcingulate_3)(lh.precentral_4)                                                              |
| 0.00028 | 1.00E-05 | 0.86857 | 0.71967 | (rh.rostralmiddlefrontal_10)(rh.rostralmiddlefrontal_11)(rh.superiorfrontal_1)(rh.superiorfrontal_2)                                 |
| 0.00029 | 1.00E-05 | 0.95429 | 0.841   | (Left-Accumbens-area)(Left-Caudate)(Left-Putamen)(lh.medialorbitofrontal_5)                                                          |
| 0.00029 | 1.00E-05 | 0.83429 | 0.67692 | (rh.fusiform_7)(rh.inferiortemporal_5)(rh.middletemporal_4)                                                                          |
| 0.00029 | 1.00E-05 | 0.83429 | 0.67692 | (lh.lateralorbitofrontal_7)(lh.rostralmiddlefrontal_11)(lh.rostralmiddlefrontal_9)                                                   |
| 0.0003  | 1.00E-05 | 0.90286 | 0.76569 | (lh.rostralmiddlefrontal_9)(lh.superiorfrontal_1)(lh.superiorfrontal_2)                                                              |
| 0.0003  | 1.00E-05 | 0.90286 | 0.76569 | (Left-Hippocampus)(lh.lingual_8)(lh.precuneus_11)                                                                                    |
| 0.00031 | 1.00E-05 | 0.94857 | 0.83264 | (lh.fusiform_1)(lh.lingual_6)                                                                                                        |
| 0.00031 | 1.00E-05 | 0.83429 | 0.67782 | (Left-Caudate)(lh.insula_6)(lh.lateralorbitofrontal_4)                                                                               |
| 0.00031 | 1.00E-05 | 0.83429 | 0.67782 | (lh.rostralmiddlefrontal_12)(lh.superiorfrontal_2)(lh.superiorfrontal_4)                                                             |
| 0.00031 | 1.00E-05 | 0.83429 | 0.67782 | (Left-Caudate)(Left-Putamen)(lh.insula_6)(lh.lateralorbitofrontal_4)                                                                 |
| 0.00031 | 1.00E-05 | 0.83429 | 0.67782 | (Right-Caudate)(Right-Putamen)(rh.lateralorbitofrontal_4)(rh.lateralorbitofrontal_5)(rh.medialorbitofrontal_2)                       |
| 0.00032 | 1.00E-05 | 0.91429 | 0.78243 | (rh.medialorbitofrontal_1)(rh.superiorfrontal_1)                                                                                     |
| 0.00032 | 1.00E-05 | 0.91429 | 0.78243 | (Right-Putamen)(rh.precentral_12)(rh.precentral_13)                                                                                  |
| 0.00032 | 1.00E-05 | 0.94286 | 0.82427 | (rh.lateralorbitofrontal_7)(rh.rostralmiddlefrontal_11)(rh.rostralmiddlefrontal_12)                                                  |
| 0.00032 | 1.00E-05 | 0.94286 | 0.82427 | (lh.fusiform_1)(lh.lingual_6)(lh.lingual_8)                                                                                          |
| 0.00032 | 1.00E-05 | 0.84571 | 0.69231 | (Left-Putamen)(lh.superiorparietal_2)                                                                                                |
| 0.00033 | 1.00E-05 | 0.92571 | 0.79916 | (lh.parstriangularis_2)(lh.parstriangularis_3)(lh.rostralmiddlefrontal_6)                                                            |
| 0.00034 | 1.00E-05 | 0.85714 | 0.70711 | (Left-Caudate)(Left-Pallidum)(lh.posteriorcingulate_1)                                                                               |
| 0.00034 | 1.00E-05 | 0.85143 | 0.7     | (lh.fusiform_1)(lh.fusiform_4)(lh.inferiortemporal_8)                                                                                |
| 0.00035 | 1.00E-05 | 0.84    | 0.68619 | (rh.lateralorbitofrontal_7)(rh.rostralmiddlefrontal_11)(rh.rostralmiddlefrontal_12)(rh.rostralmiddlefrontal_8)(rh.superiorfrontal_2) |

|         |          |         |         |                                                                                                                            |
|---------|----------|---------|---------|----------------------------------------------------------------------------------------------------------------------------|
| 0.00035 | 1.00E-05 | 0.85714 | 0.70769 | (lh.postcentral_8)(lh.precentral_14)(lh.precentral_16)                                                                     |
| 0.00036 | 1.00E-05 | 0.88571 | 0.74477 | (Left-Putamen)(lh.insula_1)(lh.insula_2)(lh.insula_3)                                                                      |
| 0.00037 | 1.00E-05 | 0.86286 | 0.71548 | (lh.parstriangularis_2)(lh.parstriangularis_3)(lh.rostralmiddlefrontal_1)(lh.rostralmiddlefrontal_6)                       |
| 0.00037 | 1.00E-05 | 0.92    | 0.79231 | (Left-Putamen)(lh.caudalanteriorcingulate_2)(lh.superiorfrontal_12)(lh.superiorfrontal_14)                                 |
| 0.00037 | 1.00E-05 | 0.92    | 0.79231 | (rh.rostralmiddlefrontal_11)(rh.rostralmiddlefrontal_12)(rh.rostralmiddlefrontal_8)(rh.superiorfrontal_2)                  |
| 0.00037 | 1.00E-05 | 0.92    | 0.79231 | (Right-Caudate)(rh.lateralorbitofrontal_4)(rh.lateralorbitofrontal_5)(rh.lateralorbitofrontal_7)                           |
| 0.00037 | 1.00E-05 | 0.86857 | 0.72308 | (lh.rostralmiddlefrontal_12)(lh.rostralmiddlefrontal_9)(lh.superiorfrontal_2)                                              |
| 0.00038 | 1.00E-05 | 0.87429 | 0.73077 | (lh.inferiorparietal_5)(lh.superiortemporal_3)                                                                             |
| 0.00038 | 1.00E-05 | 0.87429 | 0.73077 | (lh.precuneus_10)(lh.precuneus_6)(lh.precuneus_7)                                                                          |
| 0.00039 | 1.00E-05 | 0.84571 | 0.69456 | (rh.precuneus_10)(rh.precuneus_8)(rh.superiorparietal_7)                                                                   |
| 0.00039 | 1.00E-05 | 0.84571 | 0.69456 | (Right-Putamen)(rh.lateralorbitofrontal_4)(rh.lateralorbitofrontal_5)(rh.lateralorbitofrontal_7)(rh.medialorbitofrontal_2) |
| 0.00039 | 1.00E-05 | 0.88    | 0.73846 | (rh.middletemporal_3)(rh.middletemporal_6)                                                                                 |
| 0.00039 | 1.00E-05 | 0.88    | 0.73846 | (rh.inferiorparietal_11)(rh.inferiorparietal_8)                                                                            |
| 0.00039 | 1.00E-05 | 0.88    | 0.73846 | (rh.precuneus_4)(rh.precuneus_6)(rh.precuneus_7)                                                                           |
| 0.00039 | 1.00E-05 | 0.96    | 0.85356 | (Right-Amygdala)(Right-Caudate)                                                                                            |
| 0.00039 | 1.00E-05 | 0.96    | 0.85356 | (rh.paracentral_6)(rh.precuneus_10)                                                                                        |
| 0.00039 | 1.00E-05 | 0.96    | 0.85356 | (Right-Amygdala)(Right-Caudate)(Right-Thalamus-Proper)                                                                     |
| 0.00039 | 1.00E-05 | 0.96    | 0.85356 | (Right-Amygdala)(Right-Caudate)(Right-Putamen)                                                                             |
| 0.00039 | 1.00E-05 | 0.96    | 0.85356 | (Right-Amygdala)(Right-Caudate)(Right-Pallidum)                                                                            |
| 0.00039 | 1.00E-05 | 0.96    | 0.85356 | (Right-Amygdala)(Right-Caudate)(Right-Pallidum)(Right-Putamen)                                                             |
| 0.00039 | 1.00E-05 | 0.96    | 0.85356 | (Right-Amygdala)(Right-Caudate)(Right-Pallidum)(Right-Thalamus-Proper)                                                     |
| 0.00039 | 1.00E-05 | 0.96    | 0.85356 | (Right-Amygdala)(Right-Caudate)(Right-Putamen)(Right-Thalamus-Proper)                                                      |
| 0.00039 | 1.00E-05 | 0.96    | 0.85356 | (Right-Amygdala)(Right-Caudate)(Right-Pallidum)(Right-Putamen)(Right-Thalamus-Proper)                                      |
| 0.0004  | 1.00E-05 | 0.88571 | 0.74615 | (lh.rostralmiddlefrontal_11)(lh.rostralmiddlefrontal_9)                                                                    |
| 0.0004  | 1.00E-05 | 0.86857 | 0.72385 | (Right-Hippocampus)(rh.precuneus_2)(rh.precuneus_3)                                                                        |
| 0.0004  | 1.00E-05 | 0.90286 | 0.76923 | (lh.fusiform_2)(lh.lateraloccipital_7)(lh.lingual_1)(lh.pericalcarine_3)                                                   |
| 0.0004  | 1.00E-05 | 0.89714 | 0.76151 | (lh.lateralorbitofrontal_6)(lh.parstriangularis_2)(lh.parstriangularis_3)(lh.rostralmiddlefrontal_6)                       |
| 0.0004  | 1.00E-05 | 0.89714 | 0.76154 | (rh.paracentral_6)(rh.superiorparietal_7)                                                                                  |
| 0.0004  | 1.00E-05 | 0.89714 | 0.76154 | (rh.cuneus_2)(rh.cuneus_3)(rh.pericalcarine_2)                                                                             |
| 0.00043 | 1.00E-05 | 0.85143 | 0.70293 | (Right-Caudate)(Right-Hippocampus)(Right-Putamen)(Right-Thalamus-Proper)(rh.insula_1)(rh.insula_2)                         |
| 0.00043 | 1.00E-05 | 0.95429 | 0.84519 | (Right-Caudate)(Right-Putamen)(rh.lateralorbitofrontal_4)(rh.lateralorbitofrontal_5)                                       |
| 0.00044 | 1.00E-05 | 0.90857 | 0.77824 | (lh.medialorbitofrontal_1)(lh.rostralmiddlefrontal_12)(lh.superiorfrontal_1)                                               |
| 0.00044 | 1.00E-05 | 0.81714 | 0.66154 | (lh.superiorparietal_2)(lh.superiorparietal_7)                                                                             |
| 0.00044 | 1.00E-05 | 0.81714 | 0.66154 | (rh.parsopercularis_1)(rh.parstriangularis_4)                                                                              |
| 0.00045 | 1.00E-05 | 0.94857 | 0.83682 | (rh.rostralmiddlefrontal_11)(rh.rostralmiddlefrontal_12)(rh.superiorfrontal_2)                                             |
| 0.00046 | 1.00E-05 | 0.91429 | 0.78661 | (Left-Putamen)(lh.precentral_5)                                                                                            |
| 0.00047 | 1.00E-05 | 0.80571 | 0.64854 | (rh.precuneus_10)(rh.precuneus_8)(rh.superiorparietal_7)(rh.superiorparietal_8)                                            |
| 0.00047 | 1.00E-05 | 0.85714 | 0.7113  | (rh.inferiorparietal_10)(rh.inferiorparietal_11)(rh.inferiorparietal_8)                                                    |
| 0.00047 | 1.00E-05 | 0.82286 | 0.66923 | (rh.supramarginal_5)(rh.supramarginal_9)                                                                                   |
| 0.00048 | 1.00E-05 | 0.82286 | 0.66946 | (lh.fusiform_1)(lh.fusiform_2)(lh.lingual_6)(lh.pericalcarine_3)                                                           |
| 0.00048 | 1.00E-05 | 0.82286 | 0.66946 | (lh.medialorbitofrontal_1)(lh.medialorbitofrontal_2)(lh.superiorfrontal_1)(lh.superiorfrontal_3)                           |
| 0.0005  | 1.00E-05 | 0.82857 | 0.67692 | (rh.bankssts_1)(rh.inferiortemporal_7)(rh.middletemporal_1)(rh.middletemporal_2)                                           |
| 0.00051 | 1.00E-05 | 0.86286 | 0.71967 | (lh.lateralorbitofrontal_6)(lh.parstriangularis_2)(lh.rostralmiddlefrontal_6)(lh.rostralmiddlefrontal_9)                   |
| 0.00053 | 1.00E-05 | 0.84571 | 0.69874 | (rh.bankssts_2)(rh.inferiorparietal_4)(rh.inferiorparietal_9)                                                              |
| 0.00053 | 1.00E-05 | 0.84571 | 0.69874 | (lh.medialorbitofrontal_1)(lh.rostralmiddlefrontal_12)(lh.superiorfrontal_3)                                               |
| 0.00058 | 1.00E-05 | 0.97714 | 0.88703 | (Left-Accumbens-area)(lh.medialorbitofrontal_5)                                                                            |
| 0.00058 | 1.00E-05 | 0.97714 | 0.88703 | (rh.rostralmiddlefrontal_11)(rh.rostralmiddlefrontal_8)                                                                    |
| 0.00059 | 1.00E-05 | 0.85143 | 0.70711 | (Left-Pallidum)(Left-Putamen)(lh.posteriorcingulate_1)                                                                     |
| 0.00059 | 1.00E-05 | 0.85143 | 0.70711 | (Left-Caudate)(Left-Pallidum)(Left-Putamen)(lh.posteriorcingulate_1)                                                       |
| 0.00059 | 1.00E-05 | 0.85143 | 0.70711 | (Left-Caudate)(lh.lateralorbitofrontal_2)(lh.lateralorbitofrontal_7)(lh.rostralanteriorcingulate_1)                        |

|         |          |         |         |                                                                                                                                                            |
|---------|----------|---------|---------|------------------------------------------------------------------------------------------------------------------------------------------------------------|
| 0.00059 | 1.00E-05 | 0.85143 | 0.70711 | (Right-Caudate)(Right-Hippocampus)(Right-Putamen)(rh.insula_1)(rh.insula_2)                                                                                |
| 0.00059 | 1.00E-05 | 0.90286 | 0.77406 | (lh.supramarginal_5)(lh.supramarginal_6)                                                                                                                   |
| 0.00061 | 1.00E-05 | 0.85143 | 0.70769 | (lh.supramarginal_3)(lh.supramarginal_4)                                                                                                                   |
| 0.00061 | 1.00E-05 | 0.85143 | 0.70769 | (lh.supramarginal_5)(lh.supramarginal_6)(lh.supramarginal_9)                                                                                               |
| 0.00061 | 1.00E-05 | 0.85143 | 0.70769 | (lh.fusiform_1)(lh.fusiform_3)(lh.fusiform_4)                                                                                                              |
| 0.00062 | 1.00E-05 | 0.95429 | 0.84937 | (lh.medialorbitofrontal_1)(lh.superiorfrontal_1)                                                                                                           |
| 0.00064 | 1.00E-05 | 0.80571 | 0.65272 | (lh.fusiform_1)(lh.fusiform_2)(lh.lingual_6)(lh.lingual_8)(lh.pericalcarine_3)                                                                             |
| 0.00064 | 1.00E-05 | 0.85714 | 0.71538 | (lh.medialorbitofrontal_2)(lh.rostralmiddlefrontal_11)(lh.rostralmiddlefrontal_9)                                                                          |
| 0.00064 | 1.00E-05 | 0.85714 | 0.71538 | (lh.rostralmiddlefrontal_1)(lh.rostralmiddlefrontal_4)(lh.rostralmiddlefrontal_5)(lh.rostralmiddlefrontal_7)                                               |
| 0.00065 | 1.00E-05 | 0.88    | 0.74477 | (Left-Putamen)(Left-Thalamus-Proper)(lh.paracentral_5)(lh.precentral_4)                                                                                    |
| 0.00066 | 1.00E-05 | 0.92    | 0.79916 | (Left-Hippocampus)(lh.superiortemporal_3)(lh.superiortemporal_6)(lh.superiortemporal_8)                                                                    |
| 0.00066 | 1.00E-05 | 0.86286 | 0.72308 | (rh.insula_5)(rh.superiortemporal_7)                                                                                                                       |
| 0.00066 | 2.00E-05 | 0.86286 | 0.72308 | (Right-Pallidum)(rh.precentral_11)                                                                                                                         |
| 0.00068 | 2.00E-05 | 0.92571 | 0.80753 | (lh.rostralmiddlefrontal_1)(lh.rostralmiddlefrontal_5)(lh.rostralmiddlefrontal_7)                                                                          |
| 0.00068 | 2.00E-05 | 0.92571 | 0.80753 | (lh.fusiform_2)(lh.lateraloccipital_7)(lh.lingual_1)                                                                                                       |
| 0.00068 | 2.00E-05 | 0.93714 | 0.82427 | (Left-Pallidum)(lh.posteriorcingulate_3)                                                                                                                   |
| 0.00068 | 2.00E-05 | 0.93714 | 0.82427 | (Left-Caudate)(Left-Pallidum)(lh.posteriorcingulate_3)                                                                                                     |
| 0.00068 | 2.00E-05 | 0.93714 | 0.82427 | (lh.lateralorbitofrontal_7)(lh.medialorbitofrontal_1)(lh.rostralmiddlefrontal_12)                                                                          |
| 0.00069 | 2.00E-05 | 0.86857 | 0.73077 | (rh.inferiorparietal_12)(rh.inferiorparietal_6)(rh.inferiorparietal_8)                                                                                     |
| 0.00069 | 2.00E-05 | 0.80571 | 0.65385 | (lh.lateraloccipital_7)(lh.lingual_1)(lh.lingual_8)                                                                                                        |
| 0.00069 | 2.00E-05 | 0.80571 | 0.65385 | (rh.bankssts_1)(rh.inferiortemporal_6)(rh.inferiortemporal_7)(rh.middletemporal_2)                                                                         |
| 0.00071 | 2.00E-05 | 0.86286 | 0.72385 | (rh.parstriangularis_4)(rh.rostralmiddlefrontal_3)(rh.rostralmiddlefrontal_6)                                                                              |
| 0.00071 | 2.00E-05 | 0.87429 | 0.73846 | (rh.cuneus_3)(rh.precuneus_1)                                                                                                                              |
| 0.00071 | 2.00E-05 | 0.87429 | 0.73846 | (rh.inferiorparietal_10)(rh.inferiorparietal_11)(rh.lateraloccipital_10)(rh.lateraloccipital_8)                                                            |
| 0.00072 | 2.00E-05 | 0.88    | 0.74615 | (lh.inferiorparietal_3)(lh.lateraloccipital_6)                                                                                                             |
| 0.00072 | 2.00E-05 | 0.88    | 0.74615 | (Right-Putamen)(rh.rostralmiddlefrontal_5)(rh.rostralmiddlefrontal_9)                                                                                      |
| 0.00073 | 2.00E-05 | 0.91429 | 0.79231 | (lh.cuneus_2)(lh.pericalcarine_3)                                                                                                                          |
| 0.00073 | 2.00E-05 | 0.91429 | 0.79231 | (Left-Pallidum)(Left-Putamen)(lh.posteriorcingulate_3)                                                                                                     |
| 0.00073 | 2.00E-05 | 0.91429 | 0.79231 | (Left-Caudate)(Left-Pallidum)(Left-Putamen)(lh.posteriorcingulate_3)                                                                                       |
| 0.00073 | 2.00E-05 | 0.84571 | 0.70293 | (rh.lateralorbitofrontal_2)(rh.lateralorbitofrontal_6)(rh.parsorbitalis_1)                                                                                 |
| 0.00073 | 2.00E-05 | 0.84571 | 0.70293 | (lh.lateralorbitofrontal_2)(lh.lateralorbitofrontal_7)(lh.medialorbitofrontal_2)(lh.rostralanteriorcingulate_1)                                            |
| 0.00073 | 2.00E-05 | 0.84571 | 0.70293 | (Left-Caudate)(Left-Putamen)(lh.lateralorbitofrontal_2)(lh.lateralorbitofrontal_7)(lh.rostralanteriorcingulate_1)                                          |
| 0.00074 | 2.00E-05 | 0.88571 | 0.75385 | (lh.cuneus_3)(lh.pericalcarine_2)                                                                                                                          |
| 0.00074 | 2.00E-05 | 0.88571 | 0.75385 | (rh.precuneus_2)(rh.precuneus_3)                                                                                                                           |
| 0.00074 | 2.00E-05 | 0.88571 | 0.75385 | (lh.precuneus_2)(lh.precuneus_3)(lh.superiorparietal_2)                                                                                                    |
| 0.00074 | 2.00E-05 | 0.88571 | 0.75385 | (lh.lateraloccipital_6)(lh.lingual_1)(lh.lingual_3)                                                                                                        |
| 0.00074 | 2.00E-05 | 0.82857 | 0.68201 | (lh.bankssts_2)(lh.bankssts_3)(lh.inferiortemporal_7)                                                                                                      |
| 0.00074 | 2.00E-05 | 0.90857 | 0.78462 | (lh.fusiform_1)(lh.fusiform_2)(lh.lingual_6)                                                                                                               |
| 0.00077 | 2.00E-05 | 0.86857 | 0.73222 | (lh.lateralorbitofrontal_6)(lh.parstriangularis_3)(lh.rostralmiddlefrontal_1)(lh.rostralmiddlefrontal_12)(lh.rostralmiddlefrontal_6)(lh.rostralmiddlefront |
| 0.0008  | 2.00E-05 | 0.98857 | 0.91213 | (rh.bankssts_2)(rh.superiortemporal_1)                                                                                                                     |
| 0.00081 | 2.00E-05 | 0.81714 | 0.66946 | (lh.inferiorparietal_3)(lh.lateraloccipital_6)(lh.lateraloccipital_7)                                                                                      |
| 0.00081 | 2.00E-05 | 0.85143 | 0.71113 | (rh.lateralorbitofrontal_2)(rh.parsorbitalis_1)(rh.parstriangularis_1)                                                                                     |
| 0.00081 | 2.00E-05 | 0.85143 | 0.71113 | (Left-Hippocampus)(lh.inferiorparietal_5)(lh.superiortemporal_3)                                                                                           |
| 0.00083 | 2.00E-05 | 0.90286 | 0.77824 | (Left-Caudate)(lh.lateralorbitofrontal_1)                                                                                                                  |
| 0.00083 | 2.00E-05 | 0.90286 | 0.77824 | (Left-Caudate)(Left-Putamen)(lh.lateralorbitofrontal_1)                                                                                                    |
| 0.00083 | 2.00E-05 | 0.90286 | 0.77824 | (lh.lingual_6)(lh.lingual_8)(lh.precuneus_11)                                                                                                              |
| 0.00083 | 2.00E-05 | 0.87429 | 0.74059 | (Left-Caudate)(Left-Pallidum)(Left-Putamen)(lh.posteriorcingulate_3)(lh.precentral_4)                                                                      |
| 0.00085 | 2.00E-05 | 0.96    | 0.86192 | (rh.rostralmiddlefrontal_11)(rh.rostralmiddlefrontal_12)                                                                                                   |
| 0.00087 | 2.00E-05 | 0.80571 | 0.6569  | (rh.precuneus_4)(rh.precuneus_8)(rh.superiorparietal_7)                                                                                                    |
| 0.00089 | 2.00E-05 | 0.85714 | 0.71967 | (Left-Accumbens-area)(Left-Caudate)(lh.lateralorbitofrontal_2)(lh.medialorbitofrontal_5)                                                                   |

|         |          |         |         |                                                                                                                                      |
|---------|----------|---------|---------|--------------------------------------------------------------------------------------------------------------------------------------|
| 0.00091 | 2.00E-05 | 0.91429 | 0.79498 | (lh.lateraloccipital_7)(lh.lingual_1)(lh.pericalcarine_3)                                                                            |
| 0.00094 | 2.00E-05 | 0.92    | 0.80335 | (lh.cuneus_1)(lh.inferiorparietal_1)                                                                                                 |
| 0.00094 | 2.00E-05 | 0.92    | 0.80335 | (lh.lateralorbitofrontal_7)(lh.medialorbitofrontal_1)(lh.medialorbitofrontal_2)(lh.rostralmiddlefrontal_12)                          |
| 0.00094 | 2.00E-05 | 0.94857 | 0.84519 | (rh.bankssts_3)(rh.superiortemporal_1)                                                                                               |
| 0.00094 | 2.00E-05 | 0.94857 | 0.84519 | (rh.inferiortemporal_2)(rh.inferiortemporal_3)                                                                                       |
| 0.00094 | 2.00E-05 | 0.94857 | 0.84519 | (rh.rostralmiddlefrontal_10)(rh.superiorfrontal_1)                                                                                   |
| 0.00094 | 2.00E-05 | 0.94857 | 0.84519 | (Right-Caudate)(rh.lateralorbitofrontal_5)(rh.medialorbitofrontal_2)                                                                 |
| 0.00096 | 2.00E-05 | 0.92571 | 0.81172 | (Right-Caudate)(rh.lateralorbitofrontal_5)(rh.lateralorbitofrontal_7)(rh.medialorbitofrontal_2)                                      |
| 0.00097 | 2.00E-05 | 0.88571 | 0.75732 | (lh.parstriangularis_2)(lh.rostralmiddlefrontal_6)(lh.rostralmiddlefrontal_9)                                                        |
| 0.00098 | 2.00E-05 | 0.93714 | 0.82845 | (Left-Caudate)(lh.lateralorbitofrontal_2)(lh.lateralorbitofrontal_7)(lh.medialorbitofrontal_2)                                       |
| 0.001   | 2.00E-05 | 0.82857 | 0.68619 | (lh.fusiform_1)(lh.fusiform_4)(lh.fusiform_5)(lh.inferiortemporal_8)                                                                 |
| 0.001   | 2.00E-05 | 0.82857 | 0.68619 | (lh.medialorbitofrontal_1)(lh.medialorbitofrontal_2)(lh.rostralmiddlefrontal_12)(lh.superiorfrontal_3)                               |
| 0.00101 | 2.00E-05 | 0.84571 | 0.70711 | (rh.medialorbitofrontal_1)(rh.medialorbitofrontal_2)(rh.rostralmiddlefrontal_11)                                                     |
| 0.00101 | 2.00E-05 | 0.84571 | 0.70711 | (lh.fusiform_1)(lh.lingual_6)(lh.lingual_8)(lh.pericalcarine_3)                                                                      |
| 0.00103 | 2.00E-05 | 0.89143 | 0.76569 | (lh.rostralmiddlefrontal_9)(lh.superiorfrontal_1)(lh.superiorfrontal_2)(lh.superiorfrontal_3)                                        |
| 0.00105 | 2.00E-05 | 0.84571 | 0.70769 | (rh.lateralorbitofrontal_6)(rh.parsorbitalis_1)(rh.parsorbitalis_2)                                                                  |
| 0.00105 | 2.00E-05 | 0.84571 | 0.70769 | (lh.fusiform_4)(lh.fusiform_5)(lh.inferiortemporal_7)                                                                                |
| 0.00109 | 2.00E-05 | 0.81714 | 0.67364 | (Right-Caudate)(rh.insula_2)(rh.precentral_13)(rh.precentral_7)                                                                      |
| 0.00109 | 2.00E-05 | 0.81714 | 0.67364 | (Right-Caudate)(rh.lateralorbitofrontal_7)(rh.medialorbitofrontal_2)(rh.rostralmiddlefrontal_12)(rh.superiorfrontal_2)               |
| 0.00109 | 2.00E-05 | 0.81714 | 0.67364 | (Right-Caudate)(Right-Putamen)(rh.insula_2)(rh.precentral_13)(rh.precentral_7)                                                       |
| 0.0011  | 2.00E-05 | 0.89714 | 0.77406 | (Left-Caudate)(Left-Putamen)(Left-Thalamus-Proper)(lh.paracentral_5)                                                                 |
| 0.0011  | 2.00E-05 | 0.89714 | 0.77406 | (rh.medialorbitofrontal_2)(rh.rostralmiddlefrontal_11)(rh.rostralmiddlefrontal_12)(rh.superiorfrontal_2)                             |
| 0.0011  | 2.00E-05 | 0.85143 | 0.71538 | (rh.lingual_4)(rh.pericalcarine_1)(rh.pericalcarine_3)                                                                               |
| 0.00111 | 2.00E-05 | 0.85143 | 0.71548 | (Right-Caudate)(rh.lateralorbitofrontal_7)(rh.rostralmiddlefrontal_12)(rh.superiorfrontal_2)                                         |
| 0.00114 | 2.00E-05 | 0.96571 | 0.87448 | (Left-Caudate)(lh.lateralorbitofrontal_2)(lh.lateralorbitofrontal_7)                                                                 |
| 0.00115 | 2.00E-05 | 0.85714 | 0.72308 | (Left-Pallidum)(lh.posteriorcingulate_1)                                                                                             |
| 0.00119 | 2.00E-05 | 0.86286 | 0.73077 | (lh.medialorbitofrontal_1)(lh.superiorfrontal_3)                                                                                     |
| 0.00121 | 2.00E-05 | 0.98857 | 0.91632 | (lh.isthmuscingulate_2)(lh.isthmuscingulate_3)(lh.precuneus_10)                                                                      |
| 0.00122 | 2.00E-05 | 0.90857 | 0.79079 | (rh.inferiortemporal_5)(rh.middletemporal_4)(rh.middletemporal_6)                                                                    |
| 0.00124 | 2.00E-05 | 0.84    | 0.70293 | (rh.fusiform_2)(rh.fusiform_3)(rh.lingual_5)                                                                                         |
| 0.00124 | 2.00E-05 | 0.88    | 0.75314 | (rh.inferiorparietal_11)(rh.inferiorparietal_12)(rh.inferiorparietal_8)                                                              |
| 0.00124 | 2.00E-05 | 0.88    | 0.75314 | (Left-Putamen)(lh.caudalmiddlefrontal_3)(lh.caudalmiddlefrontal_4)(lh.superiorfrontal_12)                                            |
| 0.00127 | 2.00E-05 | 0.87429 | 0.74615 | (rh.inferiorparietal_6)(rh.inferiorparietal_7)                                                                                       |
| 0.00127 | 2.00E-05 | 0.87429 | 0.74615 | (rh.precuneus_5)(rh.superiorparietal_10)(rh.superiorparietal_8)                                                                      |
| 0.00127 | 2.00E-05 | 0.87429 | 0.74615 | (lh.lateralorbitofrontal_6)(lh.parstriangularis_3)(lh.rostralmiddlefrontal_1)(lh.rostralmiddlefrontal_12)(lh.rostralmiddlefrontal_6) |
| 0.00128 | 2.00E-05 | 0.91429 | 0.79916 | (lh.superiorparietal_12)(lh.superiorparietal_14)                                                                                     |
| 0.00128 | 2.00E-05 | 0.91429 | 0.79916 | (rh.parstriangularis_1)(rh.parstriangularis_3)(rh.rostralmiddlefrontal_12)                                                           |
| 0.00128 | 2.00E-05 | 0.91429 | 0.79916 | (Right-Putamen)(rh.precentral_11)(rh.precentral_12)                                                                                  |
| 0.00128 | 2.00E-05 | 0.91429 | 0.79916 | (lh.fusiform_2)(lh.lingual_1)(lh.pericalcarine_2)                                                                                    |
| 0.00131 | 2.00E-05 | 0.88    | 0.75385 | (lh.inferiorparietal_3)(lh.inferiorparietal_6)                                                                                       |
| 0.00131 | 2.00E-05 | 0.88    | 0.75385 | (rh.inferiorparietal_1)(rh.superiorparietal_10)(rh.superiorparietal_7)                                                               |
| 0.00132 | 2.00E-05 | 0.92    | 0.80753 | (rh.supramarginal_6)(rh.supramarginal_7)(rh.supramarginal_8)(rh.supramarginal_9)                                                     |
| 0.00136 | 2.00E-05 | 0.92571 | 0.8159  | (Right-Hippocampus)(Right-Pallidum)(rh.insula_2)                                                                                     |
| 0.00136 | 2.00E-05 | 0.92571 | 0.8159  | (lh.lateralorbitofrontal_6)(lh.parstriangularis_2)(lh.parstriangularis_3)(lh.rostralmiddlefrontal_9)                                 |
| 0.00136 | 2.00E-05 | 0.92571 | 0.8159  | (Right-Hippocampus)(Right-Pallidum)(Right-Putamen)(rh.insula_2)                                                                      |
| 0.00136 | 2.00E-05 | 0.92571 | 0.8159  | (Right-Hippocampus)(Right-Pallidum)(Right-Thalamus-Proper)(rh.insula_2)                                                              |
| 0.00136 | 2.00E-05 | 0.92571 | 0.8159  | (Right-Hippocampus)(Right-Pallidum)(Right-Putamen)(Right-Thalamus-Proper)(rh.insula_2)                                               |
| 0.00136 | 2.00E-05 | 0.92571 | 0.8159  | (Left-Caudate)(Left-Putamen)(lh.lateralorbitofrontal_2)(lh.lateralorbitofrontal_7)(lh.medialorbitofrontal_2)                         |
| 0.00136 | 2.00E-05 | 0.94857 | 0.84937 | (Right-Amygdala)(Right-Caudate)(Right-Hippocampus)                                                                                   |
| 0.00136 | 2.00E-05 | 0.94857 | 0.84937 | (Right-Amygdala)(Right-Caudate)(Right-Hippocampus)(Right-Pallidum)                                                                   |

|         |          |         |         |                                                                                                                 |
|---------|----------|---------|---------|-----------------------------------------------------------------------------------------------------------------|
| 0.00136 | 2.00E-05 | 0.94857 | 0.84937 | (Right-Amygdala)(Right-Caudate)(Right-Hippocampus)(Right-Putamen)                                               |
| 0.00136 | 2.00E-05 | 0.94857 | 0.84937 | (Right-Amygdala)(Right-Caudate)(Right-Hippocampus)(Right-Thalamus-Proper)                                       |
| 0.00136 | 2.00E-05 | 0.94857 | 0.84937 | (Right-Amygdala)(Right-Caudate)(Right-Hippocampus)(Right-Putamen)(Right-Thalamus-Proper)                        |
| 0.00136 | 2.00E-05 | 0.94857 | 0.84937 | (Right-Amygdala)(Right-Caudate)(Right-Hippocampus)(Right-Pallidum)(Right-Thalamus-Proper)                       |
| 0.00136 | 2.00E-05 | 0.94857 | 0.84937 | (Right-Amygdala)(Right-Caudate)(Right-Hippocampus)(Right-Pallidum)(Right-Putamen)                               |
| 0.00136 | 2.00E-05 | 0.94857 | 0.84937 | (Right-Amygdala)(Right-Caudate)(Right-Hippocampus)(Right-Pallidum)(Right-Putamen)(Right-Thalamus-Proper)        |
| 0.00136 | 2.00E-05 | 0.89143 | 0.76923 | (lh.precentral_5)(lh.precentral_6)                                                                              |
| 0.00137 | 2.00E-05 | 0.84571 | 0.7113  | (Left-Accumbens-area)(Left-Caudate)(Left-Putamen)(lh.lateralorbitofrontal_2)(lh.medialorbitofrontal_5)          |
| 0.00137 | 2.00E-05 | 0.89714 | 0.77692 | (rh.precuneus_6)(rh.precuneus_7)                                                                                |
| 0.00137 | 2.00E-05 | 0.89714 | 0.77692 | (Right-Putamen)(rh.paracentral_4)                                                                               |
| 0.00137 | 2.00E-05 | 0.89714 | 0.77692 | (lh.fusiform_1)(lh.fusiform_2)(lh.lingual_6)(lh.lingual_8)                                                      |
| 0.00138 | 2.00E-05 | 0.90857 | 0.79231 | (lh.lingual_8)(lh.precuneus_11)                                                                                 |
| 0.00138 | 2.00E-05 | 0.90857 | 0.79231 | (Right-Caudate)(Right-Putamen)(rh.lateralorbitofrontal_4)(rh.lateralorbitofrontal_5)(rh.lateralorbitofrontal_7) |
| 0.00138 | 2.00E-05 | 0.90286 | 0.78462 | (Right-Caudate)(rh.rostralmiddlefrontal_12)(rh.superiorfrontal_2)                                               |
| 0.00138 | 2.00E-05 | 0.90286 | 0.78462 | (rh.lateralorbitofrontal_7)(rh.rostralmiddlefrontal_11)(rh.rostralmiddlefrontal_12)(rh.superiorfrontal_2)       |
| 0.00138 | 2.00E-05 | 0.93143 | 0.82427 | (rh.supramarginal_4)(rh.supramarginal_8)                                                                        |
| 0.00139 | 2.00E-05 | 0.94286 | 0.841   | (rh.rostralmiddlefrontal_10)(rh.superiorfrontal_1)(rh.superiorfrontal_2)                                        |
| 0.00145 | 2.00E-05 | 0.86857 | 0.74059 | (Right-Hippocampus)(rh.bankssts_2)(rh.inferiorparietal_4)(rh.superiortemporal_1)                                |
| 0.00147 | 2.00E-05 | 0.82286 | 0.68462 | (rh.bankssts_1)(rh.inferiortemporal_6)(rh.middletemporal_1)(rh.middletemporal_2)                                |
| 0.00149 | 2.00E-05 | 0.97143 | 0.88703 | (Right-Hippocampus)(rh.bankssts_2)(rh.superiortemporal_1)                                                       |
| 0.00151 | 2.00E-05 | 0.85143 | 0.71967 | (Right-Hippocampus)(rh.bankssts_2)(rh.superiortemporal_1)(rh.superiortemporal_9)                                |
| 0.00151 | 2.00E-05 | 0.83429 | 0.69874 | (Left-Putamen)(lh.precentral_11)(lh.precentral_5)(lh.precentral_7)                                              |
| 0.00156 | 2.00E-05 | 0.82857 | 0.69231 | (rh.insula_6)(rh.lateralorbitofrontal_4)                                                                        |
| 0.00157 | 2.00E-05 | 0.87429 | 0.74895 | (Left-Pallidum)(Left-Putamen)(lh.posteriorcingulate_3)(lh.precentral_4)                                         |
| 0.00157 | 2.00E-05 | 0.98286 | 0.90795 | (lh.fusiform_2)(lh.lateraloccipital_6)(lh.lingual_1)(lh.pericalcarine_3)                                        |
| 0.00161 | 2.00E-05 | 0.90286 | 0.78661 | (Right-Accumbens-area)(Right-Amygdala)(Right-Caudate)(Right-Putamen)                                            |
| 0.00161 | 2.00E-05 | 0.90286 | 0.78661 | (Right-Accumbens-area)(Right-Amygdala)(Right-Caudate)(Right-Putamen)(Right-Thalamus-Proper)                     |
| 0.00161 | 2.00E-05 | 0.90286 | 0.78661 | (Right-Accumbens-area)(Right-Amygdala)(Right-Caudate)(Right-Pallidum)(Right-Putamen)                            |
| 0.00161 | 2.00E-05 | 0.90286 | 0.78661 | (Right-Accumbens-area)(Right-Amygdala)(Right-Caudate)(Right-Pallidum)(Right-Putamen)(Right-Thalamus-Proper)     |
| 0.00166 | 2.00E-05 | 0.96571 | 0.87866 | (Left-Caudate)(Left-Pallidum)(lh.precentral_4)                                                                  |
| 0.00168 | 2.00E-05 | 0.84    | 0.70711 | (Right-Caudate)(rh.lateralorbitofrontal_4)(rh.lateralorbitofrontal_7)(rh.medialorbitofrontal_2)                 |
| 0.00175 | 2.00E-05 | 0.84    | 0.70769 | (rh.inferiortemporal_2)(rh.superiortemporal_10)(rh.superiortemporal_7)                                          |
| 0.00175 | 2.00E-05 | 0.84    | 0.70769 | (Left-Putamen)(lh.postcentral_3)(lh.supramarginal_9)                                                            |
| 0.00177 | 2.00E-05 | 0.81143 | 0.67364 | (rh.parstriangularis_4)(rh.rostralmiddlefrontal_3)(rh.rostralmiddlefrontal_6)(rh.rostralmiddlefrontal_8)        |
| 0.00179 | 2.00E-05 | 0.96    | 0.87029 | (lh.inferiorparietal_2)(lh.inferiorparietal_3)                                                                  |
| 0.00179 | 2.00E-05 | 0.96    | 0.87029 | (Left-Accumbens-area)(Left-Putamen)(lh.medialorbitofrontal_5)                                                   |
| 0.00179 | 2.00E-05 | 0.96    | 0.87029 | (Left-Caudate)(Left-Putamen)(lh.lateralorbitofrontal_2)(lh.lateralorbitofrontal_7)                              |
| 0.00181 | 2.00E-05 | 0.86286 | 0.7364  | (rh.fusiform_1)(rh.fusiform_3)(rh.lingual_5)                                                                    |
| 0.00181 | 2.00E-05 | 0.86286 | 0.7364  | (Left-Caudate)(Left-Putamen)(Left-Thalamus-Proper)(lh.paracentral_5)(lh.precentral_4)                           |
| 0.00183 | 2.00E-05 | 0.88571 | 0.76569 | (Right-Putamen)(rh.precentral_11)(rh.precentral_12)(rh.precentral_13)                                           |
| 0.00183 | 2.00E-05 | 0.82857 | 0.69456 | (rh.lateralorbitofrontal_4)(rh.lateralorbitofrontal_6)(rh.lateralorbitofrontal_7)(rh.medialorbitofrontal_2)     |
| 0.00184 | 2.00E-05 | 0.84571 | 0.71538 | (rh.insula_7)(rh.lateralorbitofrontal_2)(rh.rostralmiddlefrontal_8)                                             |
| 0.00184 | 2.00E-05 | 0.84571 | 0.71538 | (rh.caudalmiddlefrontal_1)(rh.caudalmiddlefrontal_3)(rh.precentral_10)                                          |
| 0.00184 | 2.00E-05 | 0.84571 | 0.71538 | (Right-Caudate)(Right-Pallidum)(Right-Putamen)(rh.precentral_11)                                                |
| 0.00185 | 2.00E-05 | 0.92    | 0.81172 | (lh.lateraloccipital_6)(lh.lateraloccipital_7)(lh.lingual_1)                                                    |
| 0.00185 | 2.00E-05 | 0.92    | 0.81172 | (Right-Caudate)(rh.lateralorbitofrontal_7)(rh.rostralmiddlefrontal_12)                                          |
| 0.00185 | 2.00E-05 | 0.92    | 0.81172 | (Right-Caudate)(Right-Putamen)(rh.lateralorbitofrontal_7)(rh.rostralmiddlefrontal_12)                           |
| 0.00185 | 2.00E-05 | 0.84571 | 0.71548 | (Right-Amygdala)(Right-Hippocampus)(Right-Pallidum)(rh.insula_2)                                                |
| 0.00185 | 2.00E-05 | 0.84571 | 0.71548 | (Right-Amygdala)(Right-Hippocampus)(Right-Pallidum)(Right-Thalamus-Proper)(rh.insula_2)                         |
| 0.00185 | 2.00E-05 | 0.84571 | 0.71548 | (Right-Amygdala)(Right-Hippocampus)(Right-Pallidum)(Right-Putamen)(rh.insula_2)                                 |



|         |          |         |         |                                                                                                                            |
|---------|----------|---------|---------|----------------------------------------------------------------------------------------------------------------------------|
| 0.00185 | 2.00E-05 | 0.84571 | 0.71548 | (Right-Amygdala)(Right-Hippocampus)(Right-Pallidum)(Right-Putamen)(Right-Thalamus-Proper)(rh.insula_2)                     |
| 0.00191 | 2.00E-05 | 0.97714 | 0.89958 | (rh.precuneus_5)(rh.superiorparietal_10)                                                                                   |
| 0.00191 | 2.00E-05 | 0.92571 | 0.82008 | (lh.lateralorbitofrontal_6)(lh.parstriangularis_2)(lh.rostralmiddlefrontal_9)                                              |
| 0.00193 | 2.00E-05 | 0.85143 | 0.72308 | (Right-Amygdala)(Right-Pallidum)(rh.insula_2)                                                                              |
| 0.00193 | 2.00E-05 | 0.85143 | 0.72308 | (lh.lateraloccipital_2)(lh.lateraloccipital_3)(lh.superiorparietal_12)                                                     |
| 0.00193 | 2.00E-05 | 0.85143 | 0.72308 | (Right-Amygdala)(Right-Pallidum)(Right-Putamen)(rh.insula_2)                                                               |
| 0.00193 | 2.00E-05 | 0.85143 | 0.72308 | (Right-Amygdala)(Right-Pallidum)(Right-Thalamus-Proper)(rh.insula_2)                                                       |
| 0.00193 | 2.00E-05 | 0.85143 | 0.72308 | (Right-Amygdala)(Right-Pallidum)(Right-Putamen)(Right-Thalamus-Proper)(rh.insula_2)                                        |
| 0.00194 | 2.00E-05 | 0.94857 | 0.85356 | (Right-Caudate)(rh.lateralorbitofrontal_5)(rh.lateralorbitofrontal_7)                                                      |
| 0.00194 | 2.00E-05 | 0.94857 | 0.85356 | (Right-Pallidum)(Right-Putamen)(rh.posteriorcingulate_2)                                                                   |
| 0.00194 | 2.00E-05 | 0.94857 | 0.85356 | (Right-Caudate)(Right-Pallidum)(Right-Putamen)(rh.posteriorcingulate_2)                                                    |
| 0.00198 | 2.00E-05 | 0.81714 | 0.68201 | (lh.lateralorbitofrontal_2)(lh.lateralorbitofrontal_7)(lh.medialorbitofrontal_2)(lh.rostralmiddlefrontal_12)               |
| 0.00202 | 2.00E-05 | 0.85714 | 0.73077 | (rh.precuneus_8)(rh.superiorparietal_10)                                                                                   |
| 0.00202 | 2.00E-05 | 0.85714 | 0.73077 | (rh.supramarginal_5)(rh.supramarginal_6)                                                                                   |
| 0.00202 | 2.00E-05 | 0.85714 | 0.73077 | (rh.precuneus_10)(rh.superiorparietal_2)(rh.superiorparietal_7)                                                            |
| 0.00204 | 2.00E-05 | 0.83429 | 0.70293 | (Right-Pallidum)(rh.precentral_10)(rh.precentral_13)                                                                       |
| 0.00204 | 2.00E-05 | 0.83429 | 0.70293 | (rh.lateraloccipital_10)(rh.lateraloccipital_8)(rh.pericalcarine_1)                                                        |
| 0.00204 | 2.00E-05 | 0.83429 | 0.70293 | (Right-Pallidum)(Right-Putamen)(rh.precentral_10)(rh.precentral_13)                                                        |
| 0.0021  | 2.00E-05 | 0.86286 | 0.73846 | (Left-Hippocampus)(lh.inferiortemporal_6)                                                                                  |
| 0.0021  | 2.00E-05 | 0.86286 | 0.73846 | (lh.lingual_4)(lh.lingual_5)(lh.lingual_8)                                                                                 |
| 0.00218 | 2.00E-05 | 0.86857 | 0.74615 | (lh.lateraloccipital_6)(lh.superiorparietal_12)                                                                            |
| 0.00218 | 2.00E-05 | 0.86857 | 0.74615 | (rh.insula_7)(rh.parstriangularis_1)(rh.rostralmiddlefrontal_8)                                                            |
| 0.00218 | 2.00E-05 | 0.86857 | 0.74615 | (rh.inferiortemporal_2)(rh.inferiortemporal_3)(rh.middletemporal_7)                                                        |
| 0.00219 | 2.00E-05 | 0.97143 | 0.89121 | (Right-Caudate)(rh.lateralorbitofrontal_5)                                                                                 |
| 0.00221 | 2.00E-05 | 0.82286 | 0.69038 | (Right-Putamen)(rh.lateralorbitofrontal_4)(rh.lateralorbitofrontal_6)(rh.lateralorbitofrontal_7)(rh.medialorbitofrontal_2) |
| 0.00222 | 2.00E-05 | 0.81143 | 0.67692 | (rh.fusiform_5)(rh.inferiortemporal_6)                                                                                     |
| 0.00223 | 2.00E-05 | 0.90286 | 0.79079 | (lh.fusiform_2)(lh.pericalcarine_2)(lh.pericalcarine_3)                                                                    |
| 0.00224 | 2.00E-05 | 0.85714 | 0.73222 | (rh.inferiorparietal_10)(rh.inferiorparietal_4)(rh.inferiorparietal_9)                                                     |
| 0.00224 | 2.00E-05 | 0.85714 | 0.73222 | (Right-Putamen)(rh.precentral_10)(rh.precentral_11)(rh.precentral_13)                                                      |
| 0.00226 | 2.00E-05 | 0.84    | 0.7113  | (rh.parstriangularis_4)(rh.rostralmiddlefrontal_6)(rh.rostralmiddlefrontal_8)                                              |
| 0.00226 | 2.00E-05 | 0.87429 | 0.75385 | (rh.rostralmiddlefrontal_10)(rh.rostralmiddlefrontal_11)(rh.superiorfrontal_1)                                             |
| 0.00226 | 2.00E-05 | 0.87429 | 0.75385 | (lh.rostralmiddlefrontal_4)(lh.rostralmiddlefrontal_5)(lh.rostralmiddlefrontal_7)                                          |
| 0.00226 | 2.00E-05 | 0.87429 | 0.75385 | (lh.fusiform_1)(lh.fusiform_5)(lh.lingual_6)                                                                               |
| 0.00226 | 2.00E-05 | 0.87429 | 0.75385 | (Right-Putamen)(rh.lateralorbitofrontal_4)(rh.lateralorbitofrontal_7)(rh.medialorbitofrontal_2)                            |
| 0.00232 | 2.00E-05 | 0.88    | 0.76151 | (rh.rostralmiddlefrontal_10)(rh.rostralmiddlefrontal_11)(rh.rostralmiddlefrontal_8)(rh.superiorfrontal_2)                  |
| 0.00233 | 2.00E-05 | 0.88    | 0.76154 | (rh.lateralorbitofrontal_4)(rh.lateralorbitofrontal_7)(rh.medialorbitofrontal_2)                                           |
| 0.00235 | 2.00E-05 | 0.90857 | 0.79916 | (rh.fusiform_1)(rh.lingual_4)(rh.pericalcarine_1)                                                                          |
| 0.00235 | 2.00E-05 | 0.98286 | 0.91213 | (rh.rostralmiddlefrontal_11)(rh.superiorfrontal_1)                                                                         |
| 0.00235 | 2.00E-05 | 0.98286 | 0.91213 | (lh.lateralorbitofrontal_7)(lh.parstriangularis_3)(lh.rostralmiddlefrontal_12)                                             |
| 0.00239 | 2.00E-05 | 0.88571 | 0.76923 | (lh.postcentral_14)(lh.postcentral_8)                                                                                      |
| 0.00239 | 2.00E-05 | 0.88571 | 0.76923 | (rh.precentral_10)(rh.precentral_11)                                                                                       |
| 0.00239 | 2.00E-05 | 0.88571 | 0.76923 | (rh.parstriangularis_4)(rh.rostralmiddlefrontal_6)                                                                         |
| 0.00239 | 2.00E-05 | 0.88571 | 0.76923 | (lh.rostralmiddlefrontal_1)(lh.rostralmiddlefrontal_6)(lh.rostralmiddlefrontal_7)                                          |
| 0.00239 | 2.00E-05 | 0.88571 | 0.76923 | (Left-Caudate)(lh.lateralorbitofrontal_2)(lh.lateralorbitofrontal_7)(lh.medialorbitofrontal_5)                             |
| 0.00242 | 2.00E-05 | 0.96571 | 0.88285 | (Left-Hippocampus)(lh.superiortemporal_3)(lh.superiortemporal_8)                                                           |
| 0.00244 | 2.00E-05 | 0.89143 | 0.77692 | (rh.inferiortemporal_5)(rh.middletemporal_2)(rh.middletemporal_6)                                                          |
| 0.00245 | 2.00E-05 | 0.86286 | 0.74059 | (lh.lateralorbitofrontal_2)(lh.lateralorbitofrontal_7)(lh.rostralanterioringulate_1)                                       |
| 0.00245 | 2.00E-05 | 0.86286 | 0.74059 | (lh.parstriangularis_2)(lh.rostralmiddlefrontal_1)(lh.rostralmiddlefrontal_6)                                              |
| 0.00246 | 2.00E-05 | 0.82857 | 0.69874 | (Right-Putamen)(rh.insula_2)(rh.insula_7)                                                                                  |
| 0.00246 | 2.00E-05 | 0.82857 | 0.69874 | (rh.fusiform_1)(rh.fusiform_3)(rh.lateraloccipital_10)(rh.lingual_5)                                                       |

|         |          |         |         |                                                                                                                                      |
|---------|----------|---------|---------|--------------------------------------------------------------------------------------------------------------------------------------|
| 0.00247 | 2.00E-05 | 0.89714 | 0.78462 | (rh.inferiorparietal_9)(rh.middletemporal_1)                                                                                         |
| 0.00247 | 2.00E-05 | 0.89714 | 0.78462 | (rh.bankssts_2)(rh.inferiorparietal_4)(rh.superiortemporal_1)                                                                        |
| 0.00249 | 2.00E-05 | 0.84571 | 0.71967 | (lh.medialorbitofrontal_1)(lh.medialorbitofrontal_2)(lh.superiorfrontal_3)                                                           |
| 0.00249 | 2.00E-05 | 0.84571 | 0.71967 | (rh.fusiform_1)(rh.lateraloccipital_4)(rh.lateraloccipital_7)(rh.pericalcarine_3)                                                    |
| 0.0025  | 2.00E-05 | 0.90286 | 0.79231 | (lh.rostralmiddlefrontal_12)(lh.superiorfrontal_2)                                                                                   |
| 0.0025  | 2.00E-05 | 0.90286 | 0.79231 | (rh.inferiorparietal_4)(rh.inferiorparietal_9)                                                                                       |
| 0.0025  | 2.00E-05 | 0.90286 | 0.79231 | (lh.insula_1)(lh.postcentral_8)(lh.precentral_7)                                                                                     |
| 0.0025  | 2.00E-05 | 0.90286 | 0.79231 | (lh.lateraloccipital_7)(lh.lingual_8)(lh.pericalcarine_3)                                                                            |
| 0.0025  | 2.00E-05 | 0.90286 | 0.79231 | (lh.fusiform_1)(lh.inferiortemporal_8)(lh.lateraloccipital_9)                                                                        |
| 0.0025  | 2.00E-05 | 0.90286 | 0.79231 | (Left-Hippocampus)(Left-Thalamus-Proper)(lh.insula_1)(lh.insula_2)                                                                   |
| 0.0025  | 2.00E-05 | 0.90286 | 0.79231 | (Left-Pallidum)(Left-Putamen)(Left-Thalamus-Proper)(lh.posteriorcingulate_3)                                                         |
| 0.0025  | 2.00E-05 | 0.90286 | 0.79231 | (Right-Pallidum)(Right-Putamen)(rh.posteriorcingulate_2)(rh.precentral_13)                                                           |
| 0.0025  | 2.00E-05 | 0.90286 | 0.79231 | (Right-Caudate)(Right-Pallidum)(Right-Putamen)(rh.posteriorcingulate_2)(rh.precentral_13)                                            |
| 0.0025  | 2.00E-05 | 0.90286 | 0.79231 | (Left-Caudate)(Left-Pallidum)(Left-Putamen)(Left-Thalamus-Proper)(lh.posteriorcingulate_3)                                           |
| 0.0025  | 2.00E-05 | 0.88571 | 0.76987 | (Right-Putamen)(rh.lateralorbitofrontal_7)(rh.rostralmiddlefrontal_11)(rh.rostralmiddlefrontal_12)                                   |
| 0.0025  | 2.00E-05 | 0.88571 | 0.76987 | (lh.parstriangularis_3)(lh.rostralmiddlefrontal_1)(lh.rostralmiddlefrontal_12)(lh.rostralmiddlefrontal_6)(lh.rostralmiddlefrontal_9) |
| 0.00253 | 2.00E-05 | 0.82286 | 0.69231 | (lh.caudalmiddlefrontal_3)(lh.parsopercularis_3)(lh.parstriangularis_3)                                                              |
| 0.00253 | 2.00E-05 | 0.82286 | 0.69231 | (rh.bankssts_1)(rh.inferiortemporal_6)(rh.inferiortemporal_7)(rh.middletemporal_1)                                                   |
| 0.00257 | 2.00E-05 | 0.92    | 0.8159  | (rh.rostralmiddlefrontal_8)(rh.superiorfrontal_1)                                                                                    |
| 0.00257 | 2.00E-05 | 0.92    | 0.8159  | (rh.paracentral_3)(rh.precentral_14)(rh.precentral_15)                                                                               |
| 0.00258 | 2.00E-05 | 0.96    | 0.87448 | (rh.precuneus_5)(rh.superiorparietal_9)                                                                                              |
| 0.00258 | 2.00E-05 | 0.96    | 0.87448 | (rh.lateralorbitofrontal_4)(rh.lateralorbitofrontal_5)(rh.lateralorbitofrontal_7)                                                    |
| 0.00263 | 2.00E-05 | 1       | 0.94979 | (lh.fusiform_2)(lh.lateraloccipital_6)(lh.lingual_1)                                                                                 |
| 0.00266 | 2.00E-05 | 0.92571 | 0.82427 | (lh.fusiform_1)(lh.inferiortemporal_8)                                                                                               |
| 0.00266 | 2.00E-05 | 0.92571 | 0.82427 | (Right-Pallidum)(rh.insula_2)                                                                                                        |
| 0.00266 | 2.00E-05 | 0.92571 | 0.82427 | (rh.caudalmiddlefrontal_1)(rh.caudalmiddlefrontal_2)(rh.caudalmiddlefrontal_3)                                                       |
| 0.00266 | 2.00E-05 | 0.92571 | 0.82427 | (Right-Pallidum)(Right-Thalamus-Proper)(rh.insula_2)                                                                                 |
| 0.00266 | 2.00E-05 | 0.92571 | 0.82427 | (Right-Pallidum)(Right-Putamen)(rh.insula_2)                                                                                         |
| 0.00266 | 2.00E-05 | 0.92571 | 0.82427 | (Left-Caudate)(lh.lateralorbitofrontal_7)(lh.medialorbitofrontal_5)                                                                  |
| 0.00266 | 3.00E-05 | 0.92571 | 0.82427 | (Right-Pallidum)(Right-Putamen)(Right-Thalamus-Proper)(rh.insula_2)                                                                  |
| 0.00267 | 3.00E-05 | 0.86857 | 0.74895 | (Left-Putamen)(lh.insula_2)(lh.insula_3)(lh.precentral_11)                                                                           |
| 0.00267 | 3.00E-05 | 0.86857 | 0.74895 | (Left-Caudate)(Left-Pallidum)(Left-Thalamus-Proper)(lh.posteriorcingulate_3)(lh.precentral_4)                                        |
| 0.0027  | 3.00E-05 | 0.95429 | 0.86611 | (lh.lateralorbitofrontal_2)(lh.lateralorbitofrontal_7)(lh.medialorbitofrontal_2)                                                     |
| 0.00273 | 3.00E-05 | 0.83429 | 0.70711 | (Left-Hippocampus)(lh.isthmuscingulate_3)(lh.lingual_8)                                                                              |
| 0.00273 | 3.00E-05 | 0.83429 | 0.70711 | (Right-Caudate)(Right-Putamen)(rh.lateralorbitofrontal_4)(rh.lateralorbitofrontal_7)(rh.medialorbitofrontal_2)                       |
| 0.00273 | 3.00E-05 | 0.93143 | 0.83264 | (lh.precuneus_10)(lh.precuneus_7)                                                                                                    |
| 0.00273 | 3.00E-05 | 0.93143 | 0.83264 | (rh.caudalmiddlefrontal_1)(rh.caudalmiddlefrontal_2)(rh.caudalmiddlefrontal_4)                                                       |
| 0.00274 | 3.00E-05 | 0.85143 | 0.72803 | (lh.bankssts_2)(lh.bankssts_3)(lh.inferiortemporal_8)                                                                                |
| 0.00277 | 3.00E-05 | 0.94857 | 0.85774 | (Right-Pallidum)(rh.posteriorcingulate_2)                                                                                            |
| 0.00277 | 3.00E-05 | 0.94857 | 0.85774 | (Right-Caudate)(Right-Pallidum)(rh.posteriorcingulate_2)                                                                             |
| 0.00277 | 3.00E-05 | 0.94857 | 0.85774 | (Right-Putamen)(rh.lateralorbitofrontal_4)(rh.lateralorbitofrontal_5)(rh.lateralorbitofrontal_7)                                     |
| 0.00279 | 3.00E-05 | 0.94286 | 0.84937 | (lh.inferiorparietal_2)(lh.inferiorparietal_8)                                                                                       |
| 0.00281 | 3.00E-05 | 0.80571 | 0.67364 | (Left-Caudate)(lh.parsopercularis_3)(lh.rostralmiddlefrontal_4)                                                                      |
| 0.00284 | 3.00E-05 | 0.83429 | 0.70769 | (Left-Hippocampus)(lh.fusiform_7)(lh.inferiortemporal_6)                                                                             |
| 0.00287 | 3.00E-05 | 0.89714 | 0.78661 | (rh.parsorbitalis_1)(rh.parstriangularis_1)(rh.parstriangularis_3)                                                                   |
| 0.00287 | 3.00E-05 | 0.89714 | 0.78661 | (lh.parstriangularis_3)(lh.rostralmiddlefrontal_12)(lh.rostralmiddlefrontal_4)(lh.rostralmiddlefrontal_9)                            |
| 0.00291 | 3.00E-05 | 0.87429 | 0.75732 | (Right-Putamen)(rh.precentral_10)(rh.precentral_11)                                                                                  |
| 0.003   | 3.00E-05 | 0.84    | 0.71538 | (rh.precentral_1)(rh.precentral_7)                                                                                                   |
| 0.003   | 3.00E-05 | 0.84    | 0.71538 | (lh.inferiorparietal_1)(lh.inferiorparietal_3)(lh.lateraloccipital_6)                                                                |
| 0.003   | 3.00E-05 | 0.84    | 0.71538 | (rh.inferiortemporal_2)(rh.inferiortemporal_3)(rh.middletemporal_5)                                                                  |

|         |          |         |         |                                                                                                                                     |
|---------|----------|---------|---------|-------------------------------------------------------------------------------------------------------------------------------------|
| 0.00301 | 3.00E-05 | 0.85714 | 0.7364  | (Left-Putamen)(lh.lateralorbitofrontal_2)(lh.lateralorbitofrontal_7)(lh.rostralanteriorcingulate_1)                                 |
| 0.00306 | 3.00E-05 | 0.90286 | 0.79498 | (lh.precuneus_2)(lh.superiorparietal_7)                                                                                             |
| 0.00306 | 3.00E-05 | 0.90286 | 0.79498 | (rh.insula_3)(rh.precentral_1)                                                                                                      |
| 0.00316 | 3.00E-05 | 0.84571 | 0.72308 | (Left-Putamen)(lh.precentral_11)(lh.precentral_5)                                                                                   |
| 0.0032  | 3.00E-05 | 0.97143 | 0.8954  | (rh.supramarginal_6)(rh.supramarginal_7)(rh.supramarginal_8)                                                                        |
| 0.00323 | 3.00E-05 | 0.90857 | 0.80335 | (lh.isthmuscingulate_2)(lh.isthmuscingulate_3)(lh.precuneus_10)(lh.precuneus_6)                                                     |
| 0.00328 | 3.00E-05 | 0.82857 | 0.70293 | (Right-Putamen)(rh.insula_6)(rh.lateralorbitofrontal_4)                                                                             |
| 0.00328 | 3.00E-05 | 0.82857 | 0.70293 | (rh.lateralorbitofrontal_7)(rh.parstriangularis_1)(rh.rostralmiddlefrontal_12)(rh.rostralmiddlefrontal_13)                          |
| 0.00332 | 3.00E-05 | 0.85143 | 0.73077 | (rh.inferiorparietal_1)(rh.superiorparietal_1)(rh.superiorparietal_10)                                                              |
| 0.00332 | 3.00E-05 | 0.85143 | 0.73077 | (rh.lateraloccipital_3)(rh.pericalcarine_2)(rh.precuneus_1)                                                                         |
| 0.00332 | 3.00E-05 | 0.85143 | 0.73077 | (rh.lateralorbitofrontal_7)(rh.medialorbitofrontal_2)(rh.rostralmiddlefrontal_11)(rh.rostralmiddlefrontal_12)(rh.superiorfrontal_2) |
| 0.00348 | 3.00E-05 | 0.85714 | 0.73846 | (lh.fusiform_1)(lh.fusiform_5)(lh.lingual_6)(lh.lingual_8)                                                                          |
| 0.0035  | 3.00E-05 | 0.96571 | 0.88703 | (Left-Pallidum)(lh.precentral_4)                                                                                                    |
| 0.0035  | 3.00E-05 | 0.96571 | 0.88703 | (lh.precuneus_6)(lh.precuneus_8)(lh.superiorparietal_11)                                                                            |
| 0.0035  | 3.00E-05 | 0.98286 | 0.91632 | (rh.middletemporal_4)(rh.middletemporal_6)                                                                                          |
| 0.00351 | 3.00E-05 | 0.81714 | 0.69038 | (rh.fusiform_7)(rh.inferiortemporal_4)(rh.middletemporal_4)                                                                         |
| 0.00356 | 3.00E-05 | 0.92    | 0.82008 | (Left-Pallidum)(Left-Thalamus-Proper)(lh.posteriorcingulate_3)                                                                      |
| 0.00356 | 3.00E-05 | 0.92    | 0.82008 | (Left-Caudate)(Left-Pallidum)(Left-Thalamus-Proper)(lh.posteriorcingulate_3)                                                        |
| 0.00356 | 3.00E-05 | 0.92    | 0.82008 | (lh.medialorbitofrontal_1)(lh.medialorbitofrontal_2)(lh.superiorfrontal_1)                                                          |
| 0.0036  | 3.00E-05 | 0.86857 | 0.75314 | (Left-Pallidum)(Left-Thalamus-Proper)(lh.posteriorcingulate_3)(lh.precentral_4)                                                     |
| 0.00364 | 3.00E-05 | 0.86286 | 0.74615 | (rh.fusiform_3)(rh.lingual_5)                                                                                                       |
| 0.00367 | 3.00E-05 | 0.85143 | 0.73222 | (Left-Caudate)(Left-Pallidum)(Left-Putamen)(Left-Thalamus-Proper)(lh.posteriorcingulate_3)(lh.precentral_4)                         |
| 0.0037  | 3.00E-05 | 0.92571 | 0.82845 | (rh.lateraloccipital_3)(rh.precuneus_1)                                                                                             |
| 0.00371 | 3.00E-05 | 0.80571 | 0.67782 | (lh.fusiform_1)(lh.fusiform_2)(lh.lateraloccipital_7)(lh.pericalcarine_3)                                                           |
| 0.00371 | 3.00E-05 | 0.96    | 0.87866 | (Right-Caudate)(Right-Putamen)(rh.lateralorbitofrontal_5)                                                                           |
| 0.00371 | 3.00E-05 | 0.96    | 0.87866 | (Left-Caudate)(Left-Pallidum)(Left-Putamen)(lh.precentral_4)                                                                        |
| 0.00378 | 3.00E-05 | 0.86857 | 0.75385 | (lh.precuneus_6)(lh.precuneus_8)(lh.superiorparietal_11)(lh.superiorparietal_6)                                                     |
| 0.00381 | 3.00E-05 | 0.93143 | 0.83682 | (lh.precuneus_6)(lh.precuneus_7)                                                                                                    |
| 0.00381 | 3.00E-05 | 0.93143 | 0.83682 | (rh.inferiorparietal_10)(rh.inferiorparietal_11)(rh.lateraloccipital_10)                                                            |
| 0.00381 | 3.00E-05 | 0.93143 | 0.83682 | (Right-Caudate)(Right-Putamen)(rh.lateralorbitofrontal_5)(rh.medialorbitofrontal_2)                                                 |
| 0.00389 | 3.00E-05 | 0.93714 | 0.84519 | (lh.insula_6)(lh.lateralorbitofrontal_6)                                                                                            |
| 0.00389 | 3.00E-05 | 0.93714 | 0.84519 | (lh.isthmuscingulate_2)(lh.isthmuscingulate_3)(lh.precuneus_10)(lh.precuneus_11)                                                    |
| 0.00391 | 3.00E-05 | 0.82286 | 0.69874 | (rh.postcentral_1)(rh.precentral_1)(rh.precentral_7)                                                                                |
| 0.00391 | 3.00E-05 | 0.82286 | 0.69874 | (lh.fusiform_2)(lh.lateraloccipital_6)(lh.lingual_6)(lh.pericalcarine_3)                                                            |
| 0.00391 | 3.00E-05 | 0.89714 | 0.79079 | (lh.parstriangularis_3)(lh.rostralmiddlefrontal_12)(lh.rostralmiddlefrontal_4)                                                      |
| 0.00391 | 3.00E-05 | 0.89714 | 0.79079 | (Left-Caudate)(lh.lateralorbitofrontal_7)(lh.medialorbitofrontal_4)(lh.medialorbitofrontal_5)                                       |
| 0.00392 | 3.00E-05 | 0.87429 | 0.76151 | (Left-Putamen)(lh.caudalanteriorcingulate_2)(lh.superiorfrontal_11)(lh.superiorfrontal_12)(lh.superiorfrontal_14)                   |
| 0.00392 | 3.00E-05 | 0.87429 | 0.76151 | (Left-Caudate)(Left-Putamen)(lh.lateralorbitofrontal_2)(lh.lateralorbitofrontal_7)(lh.medialorbitofrontal_5)                        |
| 0.00392 | 3.00E-05 | 0.94857 | 0.86192 | (lh.precuneus_6)(lh.precuneus_8)(lh.precuneus_9)(lh.superiorparietal_11)                                                            |
| 0.00393 | 3.00E-05 | 0.87429 | 0.76154 | (Right-Putamen)(rh.paracentral_4)(rh.precentral_13)                                                                                 |
| 0.00393 | 3.00E-05 | 0.87429 | 0.76154 | (lh.fusiform_2)(lh.lateraloccipital_6)(lh.lingual_1)(lh.pericalcarine_2)                                                            |
| 0.00393 | 3.00E-05 | 0.94286 | 0.85356 | (Right-Caudate)(rh.rostralmiddlefrontal_12)                                                                                         |
| 0.00393 | 3.00E-05 | 0.94286 | 0.85356 | (lh.caudalmiddlefrontal_4)(lh.superiorfrontal_12)                                                                                   |
| 0.00393 | 3.00E-05 | 0.94286 | 0.85356 | (lh.lateralorbitofrontal_7)(lh.medialorbitofrontal_3)                                                                               |
| 0.00393 | 3.00E-05 | 0.94286 | 0.85356 | (rh.inferiortemporal_5)(rh.middletemporal_4)                                                                                        |
| 0.00393 | 3.00E-05 | 0.94286 | 0.85356 | (rh.rostralmiddlefrontal_6)(rh.rostralmiddlefrontal_7)                                                                              |
| 0.00393 | 3.00E-05 | 0.94286 | 0.85356 | (Right-Caudate)(Right-Putamen)(rh.rostralmiddlefrontal_12)                                                                          |
| 0.00393 | 3.00E-05 | 0.94286 | 0.85356 | (lh.isthmuscingulate_2)(lh.precuneus_10)(lh.precuneus_11)                                                                           |
| 0.00399 | 3.00E-05 | 0.81714 | 0.69231 | (rh.precentral_10)(rh.precentral_8)(rh.precentral_9)                                                                                |
| 0.00399 | 3.00E-05 | 0.81714 | 0.69231 | (Right-Pallidum)(rh.insula_1)(rh.insula_2)                                                                                          |

|         |          |         |         |                                                                                                                                          |
|---------|----------|---------|---------|------------------------------------------------------------------------------------------------------------------------------------------|
| 0.00403 | 3.00E-05 | 0.85714 | 0.74059 | (rh.supramarginal_5)(rh.supramarginal_6)(rh.supramarginal_8)                                                                             |
| 0.00403 | 3.00E-05 | 0.85714 | 0.74059 | (Left-Caudate)(Left-Putamen)(lh.caudalmiddlefrontal_3)(lh.caudalmiddlefrontal_4)(lh.superiorfrontal_12)                                  |
| 0.00406 | 3.00E-05 | 0.88    | 0.76923 | (rh.superiorparietal_11)(rh.superiorparietal_7)                                                                                          |
| 0.00406 | 3.00E-05 | 0.88    | 0.76923 | (rh.precentral_11)(rh.supramarginal_9)                                                                                                   |
| 0.00406 | 3.00E-05 | 0.88    | 0.76923 | (lh.cuneus_1)(lh.lateraloccipital_2)(lh.superiorparietal_12)                                                                             |
| 0.00406 | 3.00E-05 | 0.88    | 0.76923 | (lh.caudalmiddlefrontal_3)(lh.parstriangularis_3)(lh.rostralmiddlefrontal_1)(lh.rostralmiddlefrontal_4)                                  |
| 0.00406 | 3.00E-05 | 0.88    | 0.76923 | (Right-Putamen)(rh.rostralmiddlefrontal_11)(rh.rostralmiddlefrontal_12)(rh.rostralmiddlefrontal_8)                                       |
| 0.00417 | 3.00E-05 | 0.90286 | 0.79916 | (Right-Caudate)(rh.lateralorbitofrontal_6)(rh.rostralmiddlefrontal_12)                                                                   |
| 0.00417 | 3.00E-05 | 0.90286 | 0.79916 | (Right-Accumbens-area)(Right-Amygdala)(Right-Caudate)                                                                                    |
| 0.00417 | 3.00E-05 | 0.90286 | 0.79916 | (Right-Accumbens-area)(Right-Amygdala)(Right-Caudate)(Right-Pallidum)                                                                    |
| 0.00417 | 3.00E-05 | 0.90286 | 0.79916 | (Right-Accumbens-area)(Right-Amygdala)(Right-Caudate)(Right-Thalamus-Proper)                                                             |
| 0.00417 | 3.00E-05 | 0.90286 | 0.79916 | (Right-Caudate)(Right-Putamen)(rh.lateralorbitofrontal_6)(rh.rostralmiddlefrontal_12)                                                    |
| 0.00417 | 3.00E-05 | 0.90286 | 0.79916 | (Right-Accumbens-area)(Right-Amygdala)(Right-Caudate)(Right-Pallidum)(Right-Thalamus-Proper)                                             |
| 0.00418 | 3.00E-05 | 0.88571 | 0.77692 | (rh.fusiform_4)(rh.fusiform_5)                                                                                                           |
| 0.00418 | 3.00E-05 | 0.88571 | 0.77692 | (lh.caudalmiddlefrontal_3)(lh.parstriangularis_3)(lh.rostralmiddlefrontal_4)                                                             |
| 0.00418 | 3.00E-05 | 0.88571 | 0.77692 | (rh.fusiform_2)(rh.lateraloccipital_8)(rh.lingual_5)(rh.lingual_7)                                                                       |
| 0.00418 | 3.00E-05 | 0.88571 | 0.77692 | (rh.inferiortemporal_6)(rh.inferiortemporal_7)(rh.middletemporal_1)(rh.middletemporal_2)                                                 |
| 0.00425 | 3.00E-05 | 0.82286 | 0.7     | (rh.insula_7)(rh.rostralmiddlefrontal_5)(rh.rostralmiddlefrontal_8)                                                                      |
| 0.00425 | 3.00E-05 | 0.82286 | 0.7     | (rh.insula_3)(rh.postcentral_1)(rh.precentral_1)                                                                                         |
| 0.00425 | 3.00E-05 | 0.88    | 0.76987 | (lh.lateralorbitofrontal_6)(lh.parsorbitalis_1)(lh.rostralmiddlefrontal_12)                                                              |
| 0.00425 | 3.00E-05 | 0.88    | 0.76987 | (lh.inferiorparietal_8)(lh.superiorparietal_11)(lh.superiorparietal_5)                                                                   |
| 0.00425 | 3.00E-05 | 0.88    | 0.76987 | (Left-Hippocampus)(lh.superiortemporal_2)(lh.superiortemporal_3)                                                                         |
| 0.00428 | 3.00E-05 | 0.89143 | 0.78462 | (rh.middletemporal_2)(rh.middletemporal_4)                                                                                               |
| 0.00428 | 3.00E-05 | 0.89143 | 0.78462 | (rh.bankssts_1)(rh.inferiortemporal_6)(rh.middletemporal_2)                                                                              |
| 0.00428 | 3.00E-05 | 0.89143 | 0.78462 | (lh.cuneus_1)(lh.superiorparietal_12)(lh.superiorparietal_14)                                                                            |
| 0.00434 | 3.00E-05 | 0.82857 | 0.70711 | (lh.lateralorbitofrontal_2)(lh.lateralorbitofrontal_7)(lh.rostralmiddlefrontal_12)                                                       |
| 0.00437 | 4.00E-05 | 0.89714 | 0.79231 | (rh.rostralmiddlefrontal_10)(rh.rostralmiddlefrontal_11)(rh.rostralmiddlefrontal_8)                                                      |
| 0.00437 | 4.00E-05 | 0.89714 | 0.79231 | (rh.paracentral_6)(rh.precuneus_10)(rh.superiorparietal_2)                                                                               |
| 0.00437 | 4.00E-05 | 0.89714 | 0.79231 | (rh.bankssts_2)(rh.inferiorparietal_10)(rh.inferiorparietal_9)                                                                           |
| 0.00437 | 4.00E-05 | 0.89714 | 0.79231 | (Left-Putamen)(lh.precentral_5)(lh.precentral_7)                                                                                         |
| 0.00437 | 4.00E-05 | 0.89714 | 0.79231 | (lh.fusiform_2)(lh.lingual_1)(lh.pericalcarine_2)(lh.pericalcarine_3)                                                                    |
| 0.00443 | 4.00E-05 | 0.90857 | 0.80753 | (rh.lateralorbitofrontal_7)(rh.rostralmiddlefrontal_11)(rh.rostralmiddlefrontal_8)                                                       |
| 0.00443 | 4.00E-05 | 0.90857 | 0.80753 | (rh.rostralmiddlefrontal_8)(rh.superiorfrontal_1)(rh.superiorfrontal_2)                                                                  |
| 0.00443 | 4.00E-05 | 0.90857 | 0.80753 | (Right-Caudate)(Right-Putamen)(rh.lateralorbitofrontal_5)(rh.lateralorbitofrontal_7)(rh.medialorbitofrontal_2)                           |
| 0.00444 | 4.00E-05 | 0.84571 | 0.72803 | (Left-Caudate)(Left-Putamen)(lh.lateralorbitofrontal_2)(lh.lateralorbitofrontal_7)(lh.medialorbitofrontal_4)                             |
| 0.00446 | 4.00E-05 | 0.99429 | 0.94142 | (lh.lateraloccipital_6)(lh.lingual_1)(lh.pericalcarine_3)                                                                                |
| 0.00451 | 4.00E-05 | 0.82857 | 0.70769 | (lh.insula_1)(lh.precentral_4)                                                                                                           |
| 0.00451 | 4.00E-05 | 0.82857 | 0.70769 | (rh.insula_2)(rh.insula_7)                                                                                                               |
| 0.00451 | 4.00E-05 | 0.82857 | 0.70769 | (rh.lingual_6)(rh.pericalcarine_1)                                                                                                       |
| 0.00451 | 4.00E-05 | 0.82857 | 0.70769 | (rh.bankssts_1)(rh.inferiortemporal_5)(rh.inferiortemporal_6)(rh.middletemporal_2)                                                       |
| 0.00466 | 4.00E-05 | 0.97143 | 0.89958 | (lh.lateralorbitofrontal_6)(lh.lateralorbitofrontal_7)(lh.parstriangularis_3)(lh.rostralmiddlefrontal_12)                                |
| 0.00467 | 4.00E-05 | 0.91429 | 0.8159  | (lh.fusiform_2)(lh.pericalcarine_2)                                                                                                      |
| 0.00467 | 4.00E-05 | 0.91429 | 0.8159  | (lh.lateralorbitofrontal_5)(lh.lateralorbitofrontal_6)                                                                                   |
| 0.00478 | 4.00E-05 | 0.83429 | 0.71538 | (rh.lateraloccipital_8)(rh.pericalcarine_1)(rh.pericalcarine_3)                                                                          |
| 0.00478 | 4.00E-05 | 0.83429 | 0.71538 | (rh.fusiform_3)(rh.fusiform_4)(rh.fusiform_5)                                                                                            |
| 0.00478 | 4.00E-05 | 0.83429 | 0.71538 | (Left-Hippocampus)(lh.isthmuscingulate_2)(lh.isthmuscingulate_3)(lh.precuneus_6)                                                         |
| 0.00478 | 4.00E-05 | 0.83429 | 0.71538 | (Right-Putamen)(rh.precentral_10)(rh.precentral_11)(rh.precentral_7)                                                                     |
| 0.00482 | 4.00E-05 | 0.86857 | 0.75732 | (rh.lateralorbitofrontal_3)(rh.lateralorbitofrontal_6)                                                                                   |
| 0.00482 | 4.00E-05 | 0.86857 | 0.75732 | (rh.precuneus_8)(rh.superiorparietal_7)(rh.superiorparietal_8)                                                                           |
| 0.00482 | 4.00E-05 | 0.86857 | 0.75732 | (lh.lateralorbitofrontal_6)(lh.rostralmiddlefrontal_1)(lh.rostralmiddlefrontal_12)(lh.rostralmiddlefrontal_6)(lh.rostralmiddlefrontal_9) |

|         |          |         |         |                                                                                                                                      |
|---------|----------|---------|---------|--------------------------------------------------------------------------------------------------------------------------------------|
| 0.00488 | 4.00E-05 | 0.80571 | 0.68201 | (rh.precentral_11)(rh.superiorparietal_1)(rh.supramarginal_9)                                                                        |
| 0.00488 | 4.00E-05 | 0.80571 | 0.68201 | (lh.lateralorbitofrontal_6)(lh.parsorbitalis_1)(lh.parstriangularis_3)(lh.rostralmiddlefrontal_12)(lh.rostralmiddlefrontal_9)        |
| 0.00489 | 4.00E-05 | 0.85143 | 0.7364  | (lh.medialorbitofrontal_2)(lh.superiorfrontal_1)(lh.superiorfrontal_2)                                                               |
| 0.00489 | 4.00E-05 | 0.85143 | 0.7364  | (Left-Caudate)(Left-Putamen)(lh.paracentral_5)(lh.superiorfrontal_14)                                                                |
| 0.00489 | 4.00E-05 | 0.85143 | 0.7364  | (lh.medialorbitofrontal_2)(lh.superiorfrontal_1)(lh.superiorfrontal_2)(lh.superiorfrontal_3)                                         |
| 0.00489 | 4.00E-05 | 0.85143 | 0.7364  | (Left-Pallidum)(Left-Putamen)(Left-Thalamus-Proper)(lh.posteriorcingulate_3)(lh.precentral_4)                                        |
| 0.0049  | 4.00E-05 | 0.92    | 0.82427 | (Left-Putamen)(lh.caudalmiddlefrontal_4)(lh.superiorfrontal_12)                                                                      |
| 0.0049  | 4.00E-05 | 0.92    | 0.82427 | (lh.fusiform_2)(lh.lingual_6)(lh.pericalcarine_3)                                                                                    |
| 0.0049  | 4.00E-05 | 0.92    | 0.82427 | (lh.insula_6)(lh.lateralorbitofrontal_6)(lh.parstriangularis_3)                                                                      |
| 0.00494 | 4.00E-05 | 0.89143 | 0.78661 | (rh.inferiortemporal_3)(rh.middletemporal_5)                                                                                         |
| 0.00494 | 4.00E-05 | 0.89143 | 0.78661 | (Right-Amygdala)(rh.temporalpole_1)                                                                                                  |
| 0.00494 | 4.00E-05 | 0.89143 | 0.78661 | (lh.rostralmiddlefrontal_1)(lh.rostralmiddlefrontal_4)(lh.rostralmiddlefrontal_7)(lh.rostralmiddlefrontal_9)                         |
| 0.00505 | 4.00E-05 | 0.96571 | 0.89121 | (lh.lateralorbitofrontal_7)(lh.medialorbitofrontal_1)                                                                                |
| 0.00505 | 4.00E-05 | 0.96571 | 0.89121 | (lh.lateralorbitofrontal_6)(lh.rostralmiddlefrontal_11)                                                                              |
| 0.00505 | 4.00E-05 | 0.96571 | 0.89121 | (Left-Caudate)(lh.lateralorbitofrontal_7)(lh.medialorbitofrontal_4)                                                                  |
| 0.00506 | 4.00E-05 | 0.84    | 0.72308 | (Left-Hippocampus)(lh.isthmuscingulate_2)(lh.precuneus_6)                                                                            |
| 0.00506 | 4.00E-05 | 0.84    | 0.72308 | (Left-Caudate)(Left-Putamen)(lh.rostralmiddlefrontal_3)(lh.rostralmiddlefrontal_4)                                                   |
| 0.00511 | 4.00E-05 | 0.92571 | 0.83264 | (lh.inferiorparietal_1)(lh.precuneus_9)                                                                                              |
| 0.00511 | 4.00E-05 | 0.92571 | 0.83264 | (lh.fusiform_1)(lh.fusiform_3)(lh.lateraloccipital_9)                                                                                |
| 0.00515 | 4.00E-05 | 0.82286 | 0.70293 | (Left-Putamen)(lh.lateralorbitofrontal_2)(lh.lateralorbitofrontal_7)(lh.rostralmiddlefrontal_12)                                     |
| 0.00525 | 4.00E-05 | 0.87429 | 0.76569 | (Right-Caudate)(Right-Putamen)(rh.lateralorbitofrontal_4)(rh.medialorbitofrontal_2)                                                  |
| 0.00529 | 4.00E-05 | 0.93143 | 0.841   | (rh.insula_2)(rh.precentral_13)                                                                                                      |
| 0.00529 | 4.00E-05 | 0.93143 | 0.841   | (Right-Putamen)(rh.insula_2)(rh.precentral_13)                                                                                       |
| 0.00529 | 4.00E-05 | 0.93143 | 0.841   | (Left-Putamen)(lh.insula_6)(lh.lateralorbitofrontal_6)                                                                               |
| 0.00531 | 4.00E-05 | 0.96    | 0.88285 | (lh.lateralorbitofrontal_7)(lh.parstriangularis_3)(lh.rostralmiddlefrontal_12)(lh.rostralmiddlefrontal_9)                            |
| 0.00533 | 4.00E-05 | 0.84571 | 0.73077 | (rh.superiortemporal_1)(rh.superiortemporal_2)                                                                                       |
| 0.00533 | 4.00E-05 | 0.84571 | 0.73077 | (rh.precentral_7)(rh.supramarginal_9)                                                                                                |
| 0.00533 | 4.00E-05 | 0.84571 | 0.73077 | (lh.precuneus_2)(lh.precuneus_3)(lh.superiorparietal_7)                                                                              |
| 0.00537 | 4.00E-05 | 0.85714 | 0.74477 | (lh.lateralorbitofrontal_2)(lh.medialorbitofrontal_2)(lh.rostralanteriorcingulate_1)                                                 |
| 0.00537 | 5.00E-05 | 0.85714 | 0.74477 | (lh.fusiform_2)(lh.lateraloccipital_11)(lh.lingual_1)(lh.pericalcarine_2)                                                            |
| 0.00542 | 5.00E-05 | 0.93714 | 0.84937 | (Right-Caudate)(Right-Putamen)(rh.lateralorbitofrontal_5)(rh.lateralorbitofrontal_7)                                                 |
| 0.00542 | 5.00E-05 | 0.93714 | 0.84937 | (rh.lateralorbitofrontal_6)(rh.parsorbitalis_1)(rh.parstriangularis_1)                                                               |
| 0.00542 | 5.00E-05 | 0.93714 | 0.84937 | (Left-Putamen)(lh.lateralorbitofrontal_2)(lh.lateralorbitofrontal_7)(lh.medialorbitofrontal_2)                                       |
| 0.00546 | 5.00E-05 | 0.95429 | 0.87448 | (rh.rostralmiddlefrontal_12)(rh.rostralmiddlefrontal_7)(rh.rostralmiddlefrontal_8)                                                   |
| 0.00546 | 5.00E-05 | 0.95429 | 0.87448 | (rh.precuneus_4)(rh.precuneus_5)(rh.superiorparietal_10)                                                                             |
| 0.00546 | 5.00E-05 | 0.95429 | 0.87448 | (Left-Hippocampus)(lh.superiortemporal_3)(lh.superiortemporal_6)                                                                     |
| 0.00546 | 5.00E-05 | 0.95429 | 0.87448 | (Left-Putamen)(lh.insula_1)(lh.precentral_11)(lh.precentral_7)                                                                       |
| 0.0055  | 5.00E-05 | 0.94286 | 0.85774 | (lh.rostralmiddlefrontal_9)(lh.superiorfrontal_2)                                                                                    |
| 0.0055  | 5.00E-05 | 0.94286 | 0.85774 | (Right-Putamen)(rh.lateralorbitofrontal_4)(rh.lateralorbitofrontal_6)(rh.lateralorbitofrontal_7)                                     |
| 0.00552 | 5.00E-05 | 0.94857 | 0.86611 | (lh.middletemporal_7)(lh.superiortemporal_11)                                                                                        |
| 0.00552 | 5.00E-05 | 0.94857 | 0.86611 | (lh.lateralorbitofrontal_7)(lh.medialorbitofrontal_1)(lh.medialorbitofrontal_2)                                                      |
| 0.00552 | 5.00E-05 | 0.94857 | 0.86611 | (lh.lateralorbitofrontal_6)(lh.lateralorbitofrontal_7)(lh.parstriangularis_3)(lh.rostralmiddlefrontal_12)(lh.rostralmiddlefrontal_9) |
| 0.00561 | 5.00E-05 | 0.85143 | 0.73846 | (rh.precuneus_10)(rh.superiorparietal_1)(rh.superiorparietal_6)                                                                      |
| 0.00561 | 5.00E-05 | 0.85143 | 0.73846 | (Right-Caudate)(Right-Hippocampus)(rh.insula_1)(rh.insula_2)                                                                         |
| 0.00561 | 5.00E-05 | 0.85143 | 0.73846 | (Right-Caudate)(Right-Putamen)(rh.lateralorbitofrontal_7)(rh.rostralmiddlefrontal_12)(rh.rostralmiddlefrontal_8)                     |
| 0.00561 | 5.00E-05 | 0.85143 | 0.73846 | (Right-Caudate)(Right-Hippocampus)(Right-Thalamus-Proper)(rh.insula_1)(rh.insula_2)                                                  |
| 0.00566 | 5.00E-05 | 0.90286 | 0.80335 | (Right-Putamen)(rh.lateralorbitofrontal_2)(rh.lateralorbitofrontal_4)(rh.lateralorbitofrontal_6)(rh.lateralorbitofrontal_7)          |
| 0.0057  | 5.00E-05 | 0.88    | 0.77406 | (rh.lateraloccipital_1)(rh.superiorparietal_11)(rh.superiorparietal_13)                                                              |
| 0.0057  | 5.00E-05 | 0.88    | 0.77406 | (Right-Caudate)(rh.lateralorbitofrontal_6)(rh.lateralorbitofrontal_7)(rh.rostralmiddlefrontal_12)                                    |
| 0.0057  | 5.00E-05 | 0.88    | 0.77406 | (Right-Caudate)(Right-Putamen)(rh.lateralorbitofrontal_6)(rh.lateralorbitofrontal_7)(rh.rostralmiddlefrontal_12)                     |

|         |          |         |         |                                                                                                                                      |
|---------|----------|---------|---------|--------------------------------------------------------------------------------------------------------------------------------------|
| 0.00572 | 5.00E-05 | 0.82857 | 0.7113  | (lh.parstriangularis_1)(lh.parstriangularis_2)(lh.parstriangularis_3)                                                                |
| 0.00577 | 5.00E-05 | 0.80571 | 0.68462 | (lh.lateralorbitofrontal_4)(lh.parsorbitalis_1)(lh.parstriangularis_1)                                                               |
| 0.00577 | 5.00E-05 | 0.80571 | 0.68462 | (lh.parsopercularis_3)(lh.parstriangularis_3)(lh.rostralmiddlefrontal_4)                                                             |
| 0.00588 | 5.00E-05 | 0.86286 | 0.75314 | (rh.medialorbitofrontal_2)(rh.rostralmiddlefrontal_11)(rh.rostralmiddlefrontal_8)                                                    |
| 0.00588 | 5.00E-05 | 0.86286 | 0.75314 | (Left-Caudate)(Left-Putamen)(lh.caudalanteriorcingulate_2)(lh.superiorfrontal_11)(lh.superiorfrontal_12)(lh.superiorfrontal_14)      |
| 0.00589 | 5.00E-05 | 0.85714 | 0.74615 | (rh.insula_7)(rh.rostralmiddlefrontal_3)(rh.rostralmiddlefrontal_8)                                                                  |
| 0.00589 | 5.00E-05 | 0.85714 | 0.74615 | (rh.bankssts_2)(rh.superiortemporal_1)(rh.superiortemporal_9)                                                                        |
| 0.00589 | 5.00E-05 | 0.85714 | 0.74615 | (lh.inferiorparietal_8)(lh.inferiorparietal_9)(lh.superiorparietal_5)                                                                |
| 0.00602 | 5.00E-05 | 0.90857 | 0.81172 | (Left-Caudate)(Left-Putamen)(lh.lateralorbitofrontal_7)(lh.medialorbitofrontal_5)                                                    |
| 0.00607 | 6.00E-05 | 0.81714 | 0.69874 | (Right-Pallidum)(Right-Putamen)(rh.insula_1)(rh.insula_2)                                                                            |
| 0.00607 | 6.00E-05 | 0.81714 | 0.69874 | (Right-Putamen)(rh.precentral_10)(rh.precentral_12)(rh.precentral_13)                                                                |
| 0.00609 | 6.00E-05 | 0.97714 | 0.91213 | (Left-Caudate)(lh.caudalanteriorcingulate_2)(lh.caudalmiddlefrontal_3)(lh.superiorfrontal_11)                                        |
| 0.00616 | 6.00E-05 | 0.88571 | 0.78243 | (lh.parsorbitalis_1)(lh.rostralmiddlefrontal_12)                                                                                     |
| 0.00616 | 6.00E-05 | 0.88571 | 0.78243 | (rh.lateralorbitofrontal_6)(rh.parstriangularis_1)(rh.parstriangularis_3)(rh.rostralmiddlefrontal_12)                                |
| 0.00616 | 6.00E-05 | 0.88571 | 0.78243 | (lh.lateralorbitofrontal_7)(lh.parstriangularis_3)(lh.rostralmiddlefrontal_12)(lh.rostralmiddlefrontal_6)(lh.rostralmiddlefrontal_9) |
| 0.00617 | 6.00E-05 | 0.86286 | 0.75385 | (lh.fusiform_1)(lh.lingual_6)(lh.pericalcarine_3)                                                                                    |
| 0.00617 | 6.00E-05 | 0.86286 | 0.75385 | (Left-Putamen)(lh.caudalmiddlefrontal_4)(lh.caudalmiddlefrontal_6)(lh.superiorfrontal_12)                                            |
| 0.00621 | 6.00E-05 | 0.98857 | 0.93305 | (lh.inferiortemporal_8)(lh.lateraloccipital_9)                                                                                       |
| 0.00621 | 6.00E-05 | 0.98857 | 0.93305 | (lh.isthmuscingulate_2)(lh.precuneus_10)                                                                                             |
| 0.00621 | 6.00E-05 | 0.98857 | 0.93305 | (rh.isthmuscingulate_2)(rh.precuneus_4)(rh.precuneus_7)                                                                              |
| 0.00621 | 6.00E-05 | 0.98857 | 0.93305 | (Right-Accumbens-area)(Right-Caudate)(Right-Putamen)                                                                                 |
| 0.00621 | 6.00E-05 | 0.98857 | 0.93305 | (Right-Accumbens-area)(Right-Caudate)(Right-Pallidum)(Right-Putamen)                                                                 |
| 0.00634 | 6.00E-05 | 0.83429 | 0.71967 | (rh.inferiorparietal_10)(rh.inferiorparietal_9)(rh.middletemporal_1)                                                                 |
| 0.00637 | 6.00E-05 | 0.91429 | 0.82008 | (Left-Putamen)(lh.posteriorcingulate_3)(lh.superiorfrontal_14)                                                                       |
| 0.00637 | 6.00E-05 | 0.91429 | 0.82008 | (lh.fusiform_1)(lh.lingual_8)(lh.pericalcarine_3)                                                                                    |
| 0.00643 | 6.00E-05 | 0.86857 | 0.76154 | (lh.middletemporal_4)(lh.superiortemporal_6)                                                                                         |
| 0.00643 | 6.00E-05 | 0.86857 | 0.76154 | (lh.parsorbitalis_1)(lh.parsorbitalis_2)                                                                                             |
| 0.00643 | 6.00E-05 | 0.86857 | 0.76154 | (rh.precentral_11)(rh.superiorparietal_1)(rh.supramarginal_1)                                                                        |
| 0.00643 | 6.00E-05 | 0.86857 | 0.76154 | (rh.caudalmiddlefrontal_1)(rh.caudalmiddlefrontal_2)(rh.caudalmiddlefrontal_3)(rh.caudalmiddlefrontal_4)                             |
| 0.00643 | 6.00E-05 | 0.86857 | 0.76154 | (Right-Caudate)(rh.medialorbitofrontal_2)(rh.rostralmiddlefrontal_12)(rh.superiorfrontal_2)                                          |
| 0.00647 | 6.00E-05 | 0.85143 | 0.74059 | (Left-Accumbens-area)(Left-Putamen)(lh.lateralorbitofrontal_2)(lh.medialorbitofrontal_5)                                             |
| 0.00658 | 6.00E-05 | 0.81714 | 0.7     | (lh.parsopercularis_3)(lh.rostralmiddlefrontal_4)                                                                                    |
| 0.00658 | 6.00E-05 | 0.81714 | 0.7     | (Left-Pallidum)(lh.insula_1)(lh.precentral_7)                                                                                        |
| 0.00658 | 7.00E-05 | 0.81714 | 0.7     | (Right-Putamen)(rh.insula_7)(rh.rostralmiddlefrontal_5)(rh.rostralmiddlefrontal_8)                                                   |
| 0.00665 | 7.00E-05 | 0.89143 | 0.79079 | (rh.lateralorbitofrontal_4)(rh.medialorbitofrontal_2)                                                                                |
| 0.00665 | 7.00E-05 | 0.89143 | 0.79079 | (lh.lateralorbitofrontal_7)(lh.medialorbitofrontal_1)(lh.medialorbitofrontal_3)                                                      |
| 0.00669 | 7.00E-05 | 0.87429 | 0.76923 | (rh.posteriorcingulate_4)(rh.precentral_11)                                                                                          |
| 0.00669 | 7.00E-05 | 0.87429 | 0.76923 | (rh.parsopercularis_4)(rh.rostralmiddlefrontal_8)                                                                                    |
| 0.00669 | 7.00E-05 | 0.87429 | 0.76923 | (rh.medialorbitofrontal_1)(rh.rostralmiddlefrontal_11)(rh.superiorfrontal_1)                                                         |
| 0.00669 | 7.00E-05 | 0.87429 | 0.76923 | (rh.insula_3)(rh.precentral_1)(rh.precentral_6)                                                                                      |
| 0.00669 | 7.00E-05 | 0.87429 | 0.76923 | (lh.bankssts_2)(lh.inferiortemporal_7)(lh.inferiortemporal_8)                                                                        |
| 0.00669 | 7.00E-05 | 0.87429 | 0.76923 | (Right-Caudate)(Right-Putamen)(rh.rostralmiddlefrontal_12)(rh.superiorfrontal_2)                                                     |
| 0.00669 | 7.00E-05 | 0.87429 | 0.76923 | (Left-Putamen)(lh.caudalanteriorcingulate_2)(lh.caudalmiddlefrontal_3)(lh.superiorfrontal_11)(lh.superiorfrontal_12)                 |
| 0.00675 | 7.00E-05 | 0.82286 | 0.70711 | (lh.lateraloccipital_6)(lh.lingual_1)(lh.lingual_3)(lh.lingual_4)                                                                    |
| 0.00675 | 7.00E-05 | 0.82286 | 0.70711 | (Right-Caudate)(Right-Putamen)(rh.lateralorbitofrontal_7)(rh.rostralmiddlefrontal_12)(rh.superiorfrontal_2)                          |
| 0.00676 | 7.00E-05 | 0.97143 | 0.90377 | (lh.precentral_15)(lh.precentral_16)                                                                                                 |
| 0.00676 | 7.00E-05 | 0.97143 | 0.90377 | (lh.isthmuscingulate_3)(lh.precuneus_10)(lh.precuneus_6)                                                                             |
| 0.00679 | 7.00E-05 | 0.99429 | 0.94561 | (lh.inferiortemporal_7)(lh.inferiortemporal_8)                                                                                       |
| 0.00679 | 7.00E-05 | 0.99429 | 0.94561 | (rh.insula_3)(rh.insula_7)                                                                                                           |
| 0.00679 | 7.00E-05 | 0.99429 | 0.94561 | (rh.fusiform_2)(rh.lingual_7)                                                                                                        |

|         |          |         |         |                                                                                                                                  |
|---------|----------|---------|---------|----------------------------------------------------------------------------------------------------------------------------------|
| 0.00679 | 7.00E-05 | 0.99429 | 0.94561 | (rh.precentral_10)(rh.precentral_8)                                                                                              |
| 0.00679 | 8.00E-05 | 0.99429 | 0.94561 | (rh.caudalmiddlefrontal_1)(rh.caudalmiddlefrontal_3)                                                                             |
| 0.00679 | 8.00E-05 | 0.99429 | 0.94561 | (Right-Putamen)(rh.insula_3)(rh.insula_7)                                                                                        |
| 0.00694 | 8.00E-05 | 0.88    | 0.77692 | (lh.fusiform_8)(lh.insula_4)                                                                                                     |
| 0.00694 | 8.00E-05 | 0.88    | 0.77692 | (lh.insula_1)(lh.postcentral_3)                                                                                                  |
| 0.00694 | 8.00E-05 | 0.88    | 0.77692 | (rh.precentral_3)(rh.precentral_6)                                                                                               |
| 0.00699 | 8.00E-05 | 0.87429 | 0.76987 | (Right-Caudate)(Right-Putamen)(rh.insula_1)(rh.insula_2)(rh.supramarginal_9)                                                     |
| 0.00701 | 8.00E-05 | 0.84    | 0.72803 | (lh.lateraloccipital_6)(lh.pericalcarine_3)(lh.superiorparietal_12)                                                              |
| 0.00701 | 8.00E-05 | 0.84    | 0.72803 | (Left-Caudate)(Left-Putamen)(lh.paracentral_5)(lh.superiorfrontal_12)                                                            |
| 0.00701 | 8.00E-05 | 0.84    | 0.72803 | (Left-Caudate)(lh.lateralorbitofrontal_2)(lh.medialorbitofrontal_2)(lh.rostralanteriorcingulate_1)                               |
| 0.00701 | 8.00E-05 | 0.82286 | 0.70769 | (rh.parsorbitalis_2)(rh.parstriangularis_3)(rh.rostralmiddlefrontal_12)                                                          |
| 0.00701 | 8.00E-05 | 0.82286 | 0.70769 | (rh.fusiform_2)(rh.fusiform_3)(rh.fusiform_5)                                                                                    |
| 0.00702 | 8.00E-05 | 0.92571 | 0.83682 | (lh.superiortemporal_11)(lh.superiortemporal_9)                                                                                  |
| 0.00702 | 8.00E-05 | 0.92571 | 0.83682 | (rh.parsorbitalis_1)(rh.parstriangularis_3)                                                                                      |
| 0.0071  | 9.00E-05 | 0.85714 | 0.74895 | (Right-Pallidum)(rh.precentral_11)(rh.precentral_13)                                                                             |
| 0.0071  | 9.00E-05 | 0.85714 | 0.74895 | (Right-Pallidum)(Right-Putamen)(rh.precentral_11)(rh.precentral_13)                                                              |
| 0.0071  | 9.00E-05 | 0.85714 | 0.74895 | (Left-Putamen)(lh.insula_6)(lh.lateralorbitofrontal_6)(lh.parstriangularis_3)(lh.rostralmiddlefrontal_1)                         |
| 0.00711 | 9.00E-05 | 0.81143 | 0.69456 | (lh.parsorbitalis_1)(lh.parstriangularis_3)(lh.rostralmiddlefrontal_12)(lh.rostralmiddlefrontal_9)                               |
| 0.00711 | 9.00E-05 | 0.81143 | 0.69456 | (rh.fusiform_1)(rh.fusiform_2)(rh.fusiform_3)(rh.lingual_5)                                                                      |
| 0.00714 | 9.00E-05 | 0.89714 | 0.79916 | (rh.parsorbitalis_1)(rh.parsorbitalis_2)                                                                                         |
| 0.00717 | 9.00E-05 | 0.88571 | 0.78462 | (lh.parstriangularis_3)(lh.rostralmiddlefrontal_1)(lh.rostralmiddlefrontal_12)(lh.rostralmiddlefrontal_6)                        |
| 0.00717 | 9.00E-05 | 0.88571 | 0.78462 | (lh.fusiform_1)(lh.fusiform_3)(lh.fusiform_5)(lh.lateraloccipital_9)                                                             |
| 0.00717 | 9.00E-05 | 0.88571 | 0.78462 | (rh.lateralorbitofrontal_6)(rh.lateralorbitofrontal_7)(rh.parstriangularis_4)(rh.rostralmiddlefrontal_12)                        |
| 0.00725 | 9.00E-05 | 0.96571 | 0.8954  | (rh.lateralorbitofrontal_6)(rh.parsorbitalis_2)                                                                                  |
| 0.00729 | 0.0001   | 0.93143 | 0.84519 | (rh.lateralorbitofrontal_2)(rh.lateralorbitofrontal_7)(rh.parstriangularis_1)(rh.rostralmiddlefrontal_12)                        |
| 0.00739 | 0.0001   | 0.89143 | 0.79231 | (Left-Hippocampus)(lh.precuneus_10)                                                                                              |
| 0.00739 | 0.0001   | 0.89143 | 0.79231 | (rh.precuneus_8)(rh.superiorparietal_7)                                                                                          |
| 0.00739 | 0.0001   | 0.89143 | 0.79231 | (lh.caudalmiddlefrontal_3)(lh.caudalmiddlefrontal_4)(lh.superiorfrontal_12)                                                      |
| 0.00739 | 0.0001   | 0.89143 | 0.79231 | (Left-Hippocampus)(lh.isthmuscingulate_3)(lh.precuneus_10)                                                                       |
| 0.00739 | 0.0001   | 0.89143 | 0.79231 | (Left-Putamen)(lh.superiorfrontal_11)(lh.superiorfrontal_12)(lh.superiorfrontal_14)                                              |
| 0.00745 | 0.0001   | 0.82857 | 0.71538 | (rh.fusiform_3)(rh.lateraloccipital_10)(rh.lingual_5)                                                                            |
| 0.00745 | 0.0001   | 0.82857 | 0.71538 | (Left-Hippocampus)(lh.fusiform_5)(lh.inferiortemporal_8)                                                                         |
| 0.00751 | 0.0001   | 0.93714 | 0.85356 | (lh.inferiorparietal_4)(lh.lateraloccipital_7)                                                                                   |
| 0.00751 | 0.0001   | 0.93714 | 0.85356 | (lh.medialorbitofrontal_2)(lh.rostralmiddlefrontal_11)                                                                           |
| 0.00751 | 0.00011  | 0.93714 | 0.85356 | (lh.medialorbitofrontal_1)(lh.medialorbitofrontal_2)(lh.rostralmiddlefrontal_12)                                                 |
| 0.00755 | 0.00011  | 0.96    | 0.88703 | (rh.postcentral_10)(rh.postcentral_8)                                                                                            |
| 0.00755 | 0.00011  | 0.96    | 0.88703 | (Left-Pallidum)(Left-Putamen)(lh.precentral_4)                                                                                   |
| 0.0076  | 0.00011  | 0.88    | 0.77824 | (lh.lateralorbitofrontal_4)(lh.lateralorbitofrontal_5)(lh.lateralorbitofrontal_6)                                                |
| 0.00764 | 0.00011  | 0.90286 | 0.80753 | (Right-Caudate)(Right-Putamen)(rh.rostralmiddlefrontal_12)(rh.rostralmiddlefrontal_8)                                            |
| 0.00764 | 0.00011  | 0.90286 | 0.80753 | (rh.lateralorbitofrontal_2)(rh.lateralorbitofrontal_4)(rh.lateralorbitofrontal_6)(rh.lateralorbitofrontal_7)                     |
| 0.00767 | 0.00011  | 0.94286 | 0.86192 | (rh.medialorbitofrontal_1)(rh.rostralmiddlefrontal_11)                                                                           |
| 0.00767 | 0.00011  | 0.94286 | 0.86192 | (rh.lateralorbitofrontal_4)(rh.lateralorbitofrontal_6)(rh.lateralorbitofrontal_7)                                                |
| 0.00771 | 0.00011  | 0.98286 | 0.92469 | (rh.lateralorbitofrontal_4)(rh.lateralorbitofrontal_5)                                                                           |
| 0.00771 | 0.00012  | 0.95429 | 0.87866 | (lh.medialorbitofrontal_1)(lh.rostralmiddlefrontal_12)                                                                           |
| 0.00771 | 0.00012  | 0.95429 | 0.87866 | (rh.rostralmiddlefrontal_11)(rh.rostralmiddlefrontal_8)(rh.superiorfrontal_2)                                                    |
| 0.00771 | 0.00012  | 0.95429 | 0.87866 | (lh.insula_1)(lh.precentral_11)(lh.precentral_7)                                                                                 |
| 0.00774 | 0.00012  | 0.94857 | 0.87029 | (rh.inferiortemporal_7)(rh.middletemporal_1)(rh.middletemporal_2)                                                                |
| 0.00774 | 0.00012  | 0.94857 | 0.87029 | (rh.isthmuscingulate_2)(rh.precuneus_3)(rh.precuneus_4)(rh.precuneus_7)                                                          |
| 0.00774 | 0.00012  | 0.94857 | 0.87029 | (Left-Caudate)(Left-Putamen)(lh.caudalanteriorcingulate_2)(lh.caudalmiddlefrontal_3)(lh.superiorfrontal_11)                      |
| 0.00778 | 0.00013  | 0.86286 | 0.75732 | (rh.lateralorbitofrontal_6)(rh.lateralorbitofrontal_7)(rh.parstriangularis_1)(rh.parstriangularis_4)(rh.rostralmiddlefrontal_12) |

|         |         |         |         |                                                                                                                                       |
|---------|---------|---------|---------|---------------------------------------------------------------------------------------------------------------------------------------|
| 0.0079  | 0.00013 | 0.83429 | 0.72308 | (rh.precuneus_10)(rh.superiorparietal_1)(rh.superiorparietal_2)(rh.superiorparietal_7)                                                |
| 0.00792 | 0.00013 | 0.81714 | 0.70293 | (rh.lateralorbitofrontal_6)(rh.lateralorbitofrontal_7)(rh.parstriangularis_1)(rh.rostralmiddlefrontal_12)(rh.rostralmiddlefrontal_13) |
| 0.00792 | 0.00013 | 0.81714 | 0.70293 | (Right-Putamen)(rh.insula_7)(rh.lateralorbitofrontal_2)(rh.lateralorbitofrontal_6)(rh.parstriangularis_1)                             |
| 0.00815 | 0.00014 | 0.90857 | 0.8159  | (Left-Caudate)(Left-Putamen)(lh.posteriorcingulate_3)(lh.superiorfrontal_14)                                                          |
| 0.00815 | 0.00014 | 0.90857 | 0.8159  | (lh.rostralmiddlefrontal_1)(lh.rostralmiddlefrontal_4)(lh.rostralmiddlefrontal_7)                                                     |
| 0.00815 | 0.00014 | 0.90857 | 0.8159  | (lh.rostralmiddlefrontal_8)(lh.superiorfrontal_3)(lh.superiorfrontal_5)                                                               |
| 0.00815 | 0.00014 | 0.90857 | 0.8159  | (lh.rostralmiddlefrontal_8)(lh.superiorfrontal_3)(lh.superiorfrontal_4)(lh.superiorfrontal_5)                                         |
| 0.00815 | 0.00014 | 0.90857 | 0.8159  | (Left-Caudate)(Left-Putamen)(lh.caudalanteriorcingulate_2)(lh.superiorfrontal_12)(lh.superiorfrontal_14)                              |
| 0.00823 | 0.00015 | 0.88571 | 0.78661 | (Right-Putamen)(rh.lateralorbitofrontal_4)(rh.medialorbitofrontal_2)                                                                  |
| 0.00823 | 0.00015 | 0.88571 | 0.78661 | (lh.insula_6)(lh.lateralorbitofrontal_6)(lh.parstriangularis_3)(lh.rostralmiddlefrontal_1)                                            |
| 0.0083  | 0.00015 | 0.83429 | 0.72385 | (lh.parstriangularis_3)(lh.rostralmiddlefrontal_1)(lh.rostralmiddlefrontal_12)(lh.rostralmiddlefrontal_4)(lh.rostralmiddlefrontal_9)  |
| 0.00836 | 0.00015 | 0.84    | 0.73077 | (lh.bankssts_2)(lh.middletemporal_2)                                                                                                  |
| 0.00836 | 0.00016 | 0.84    | 0.73077 | (rh.inferiorparietal_12)(rh.lateraloccipital_8)(rh.precuneus_2)                                                                       |
| 0.00836 | 0.00016 | 0.84    | 0.73077 | (lh.fusiform_2)(lh.lateraloccipital_6)(lh.lingual_6)                                                                                  |
| 0.0085  | 0.00016 | 0.86857 | 0.76569 | (rh.precentral_10)(rh.precentral_11)(rh.precentral_13)                                                                                |
| 0.0085  | 0.00016 | 0.86857 | 0.76569 | (lh.rostralmiddlefrontal_12)(lh.rostralmiddlefrontal_8)(lh.superiorfrontal_3)                                                         |
| 0.0085  | 0.00017 | 0.86857 | 0.76569 | (Left-Caudate)(Left-Putamen)(lh.caudalanteriorcingulate_2)(lh.caudalmiddlefrontal_3)(lh.superiorfrontal_11)(lh.superiorfrontal_12)    |
| 0.0085  | 0.00017 | 0.85143 | 0.74477 | (lh.caudalmiddlefrontal_2)(lh.caudalmiddlefrontal_3)(lh.rostralmiddlefrontal_3)                                                       |
| 0.0085  | 0.00017 | 0.85143 | 0.74477 | (Left-Putamen)(lh.lateralorbitofrontal_2)(lh.lateralorbitofrontal_4)(lh.lateralorbitofrontal_7)                                       |
| 0.00864 | 0.00018 | 0.91429 | 0.82427 | (lh.inferiorparietal_4)(lh.inferiorparietal_5)                                                                                        |
| 0.00864 | 0.00019 | 0.91429 | 0.82427 | (rh.lateralorbitofrontal_6)(rh.parsorbitalis_2)(rh.rostralmiddlefrontal_13)                                                           |
| 0.00864 | 0.00019 | 0.91429 | 0.82427 | (Left-Caudate)(lh.caudalanteriorcingulate_2)(lh.caudalmiddlefrontal_3)(lh.superiorfrontal_11)(lh.superiorfrontal_12)                  |
| 0.00883 | 0.00019 | 0.84571 | 0.73846 | (lh.superiortemporal_11)(lh.temporalpole_1)                                                                                           |
| 0.00883 | 0.0002  | 0.84571 | 0.73846 | (lh.lateralorbitofrontal_5)(lh.lateralorbitofrontal_6)(lh.parstriangularis_1)                                                         |
| 0.00883 | 0.0002  | 0.84571 | 0.73846 | (Left-Pallidum)(lh.precentral_4)(lh.precentral_7)                                                                                     |
| 0.00888 | 0.0002  | 0.89143 | 0.79498 | (lh.lateralorbitofrontal_7)(lh.medialorbitofrontal_2)(lh.rostralmiddlefrontal_11)                                                     |
| 0.00889 | 0.00021 | 0.97714 | 0.91632 | (lh.lateralorbitofrontal_2)(lh.lateralorbitofrontal_7)                                                                                |
| 0.00889 | 0.00021 | 0.97714 | 0.91632 | (Left-Caudate)(lh.lateralorbitofrontal_7)(lh.medialorbitofrontal_2)                                                                   |
| 0.00912 | 0.00024 | 0.92    | 0.83264 | (lh.rostralmiddlefrontal_8)(lh.superiorfrontal_5)                                                                                     |
| 0.00912 | 0.00025 | 0.92    | 0.83264 | (lh.insula_2)(lh.insula_3)                                                                                                            |
| 0.00912 | 0.00026 | 0.92    | 0.83264 | (rh.lateraloccipital_1)(rh.pericalcarine_3)                                                                                           |
| 0.00912 | 0.00026 | 0.92    | 0.83264 | (Left-Putamen)(lh.insula_2)(lh.insula_3)                                                                                              |
| 0.00912 | 0.00027 | 0.92    | 0.83264 | (lh.caudalanteriorcingulate_2)(lh.caudalmiddlefrontal_3)(lh.superiorfrontal_11)(lh.superiorfrontal_12)                                |
| 0.00912 | 0.00028 | 0.92    | 0.83264 | (Left-Putamen)(lh.insula_6)(lh.parsopercularis_1)(lh.parstriangularis_3)(lh.rostralmiddlefrontal_1)                                   |
| 0.00912 | 0.00029 | 0.92    | 0.83264 | (rh.parstriangularis_3)(rh.rostralmiddlefrontal_12)                                                                                   |
| 0.00926 | 0.00029 | 0.87429 | 0.77406 | (lh.fusiform_2)(lh.lateraloccipital_6)(lh.pericalcarine_2)                                                                            |
| 0.00926 | 0.0003  | 0.87429 | 0.77406 | (Left-Caudate)(Left-Putamen)(lh.caudalmiddlefrontal_3)(lh.rostralmiddlefrontal_4)(lh.superiorfrontal_11)                              |
| 0.0093  | 0.00031 | 0.85143 | 0.74615 | (Right-Putamen)(rh.caudalanteriorcingulate_1)(rh.caudalanteriorcingulate_2)                                                           |
| 0.0093  | 0.00032 | 0.85143 | 0.74615 | (lh.rostralanteriorcingulate_2)(lh.superiorfrontal_4)(lh.superiorfrontal_5)                                                           |
| 0.0093  | 0.00033 | 0.85143 | 0.74615 | (Right-Caudate)(Right-Putamen)(rh.caudalanteriorcingulate_1)(rh.caudalanteriorcingulate_2)                                            |
| 0.0093  | 0.00034 | 0.85143 | 0.74615 | (Right-Caudate)(rh.lateralorbitofrontal_7)(rh.rostralmiddlefrontal_12)(rh.rostralmiddlefrontal_8)                                     |
| 0.00932 | 0.00036 | 0.98857 | 0.93724 | (lh.precuneus_6)(lh.superiorparietal_11)                                                                                              |
| 0.00932 | 0.00037 | 0.98857 | 0.93724 | (rh.lateralorbitofrontal_2)(rh.lateralorbitofrontal_6)(rh.parstriangularis_1)                                                         |
| 0.00932 | 0.00038 | 0.98857 | 0.93724 | (lh.lingual_1)(lh.pericalcarine_2)(lh.pericalcarine_3)                                                                                |
| 0.00956 | 0.00042 | 0.89714 | 0.80335 | (rh.lateralorbitofrontal_6)(rh.lateralorbitofrontal_7)(rh.parstriangularis_4)                                                         |
| 0.00956 | 0.00043 | 0.89714 | 0.80335 | (rh.lateraloccipital_1)(rh.lateraloccipital_3)(rh.pericalcarine_3)                                                                    |
| 0.00956 | 0.00045 | 0.89714 | 0.80335 | (Right-Putamen)(rh.rostralmiddlefrontal_11)(rh.rostralmiddlefrontal_12)                                                               |
| 0.00956 | 0.00048 | 0.89714 | 0.80335 | (rh.lateralorbitofrontal_7)(rh.medialorbitofrontal_2)(rh.rostralmiddlefrontal_11)(rh.rostralmiddlefrontal_12)                         |
| 0.00958 | 0.0005  | 0.92571 | 0.841   | (lh.lateraloccipital_7)(lh.lingual_1)                                                                                                 |
| 0.00958 | 0.00053 | 0.92571 | 0.841   | (rh.precuneus_5)(rh.superiorparietal_8)                                                                                               |



|         |         |         |         |                                                                                                                                 |
|---------|---------|---------|---------|---------------------------------------------------------------------------------------------------------------------------------|
| 0.00958 | 0.00056 | 0.92571 | 0.841   | (rh.supramarginal_6)(rh.supramarginal_7)(rh.supramarginal_9)                                                                    |
| 0.00976 | 0.00059 | 0.82857 | 0.71967 | (lh.fusiform_1)(lh.fusiform_3)(lh.lingual_8)                                                                                    |
| 0.00976 | 0.00063 | 0.82857 | 0.71967 | (Left-Putamen)(lh.lateralorbitofrontal_2)(lh.lateralorbitofrontal_6)(lh.lateralorbitofrontal_7)                                 |
| 0.00976 | 0.00067 | 0.97143 | 0.90795 | (rh.lateralorbitofrontal_7)(rh.medialorbitofrontal_2)(rh.rostralmiddlefrontal_13)                                               |
| 0.00976 | 0.00071 | 0.97143 | 0.90795 | (rh.rostralmiddlefrontal_11)(rh.superiorfrontal_1)(rh.superiorfrontal_2)                                                        |
| 0.00976 | 0.00077 | 0.97143 | 0.90795 | (lh.parstriangularis_3)(lh.rostralmiddlefrontal_1)(lh.rostralmiddlefrontal_6)                                                   |
| 0.00978 | 0.00083 | 0.85714 | 0.75385 | (lh.insula_2)(lh.postcentral_8)                                                                                                 |
| 0.00978 | 0.00091 | 0.85714 | 0.75385 | (rh.cuneus_2)(rh.lateraloccipital_1)                                                                                            |
| 0.00978 | 0.001   | 0.85714 | 0.75385 | (rh.fusiform_1)(rh.lateraloccipital_8)(rh.pericalcarine_3)                                                                      |
| 0.00978 | 0.00111 | 0.85714 | 0.75385 | (Left-Caudate)(Left-Putamen)(lh.rostralmiddlefrontal_3)                                                                         |
| 0.00978 | 0.00125 | 0.85714 | 0.75385 | (lh.lateralorbitofrontal_6)(lh.parstriangularis_2)(lh.parstriangularis_3)(lh.rostralmiddlefrontal_1)(lh.rostralmiddlefrontal_9) |
| 0.00999 | 0.005   | 0.93143 | 0.84937 | (lh.lateralorbitofrontal_7)(lh.parstriangularis_3)(lh.rostralanteriorcingulate_1)(lh.rostralmiddlefrontal_12)                   |
| 0.00999 | 0.01    | 0.93143 | 0.84937 | (lh.rostralmiddlefrontal_9)(lh.superiorfrontal_2)(lh.superiorfrontal_3)                                                         |











:al\_9)
