# Supplementary material for: The frequent complete subgraphs in the human connectome
Source: PubMed Central journal article supplement (PMC7444532; doi:10.1371/journal.pone.0236883), 2020-08-20
Supplement: pone.0236883.s004.pdf [file pone.0236883.s004.pdf]

|                  |      |      |      |     |     |    |   |   |   |
|------------------|------|------|------|-----|-----|----|---|---|---|
| run #9           |      |      |      |     |     |    |   |   |   |
| male:            | 2513 | 3885 | 2599 | 989 | 199 | 21 | 0 | 0 | 0 |
| female:          | 2419 | 3484 | 2217 | 745 | 129 | 2  | 0 | 0 | 0 |
| male plus: 706   |      |      |      |     |     |    |   |   |   |
| female plus: 126 |      |      |      |     |     |    |   |   |   |
| run #10          |      |      |      |     |     |    |   |   |   |
| male:            | 2535 | 3820 | 2464 | 873 | 142 | 5  | 0 | 0 | 0 |
| female:          | 2357 | 3345 | 2111 | 761 | 146 | 13 | 0 | 0 | 0 |
| male plus: 743   |      |      |      |     |     |    |   |   |   |
| female plus: 224 |      |      |      |     |     |    |   |   |   |
| run #11          |      |      |      |     |     |    |   |   |   |
| male:            | 2563 | 3863 | 2547 | 908 | 168 | 15 | 0 | 0 | 0 |
| female:          | 2383 | 3409 | 2262 | 808 | 182 | 25 | 1 | 0 | 0 |
| male plus: 695   |      |      |      |     |     |    |   |   |   |
| female plus: 178 |      |      |      |     |     |    |   |   |   |
| run #12          |      |      |      |     |     |    |   |   |   |
| male:            | 2470 | 3703 | 2380 | 744 | 100 | 4  | 0 | 0 | 0 |
| female:          | 2369 | 3353 | 2115 | 729 | 141 | 14 | 0 | 0 | 0 |
| male plus: 552   |      |      |      |     |     |    |   |   |   |
| female plus: 159 |      |      |      |     |     |    |   |   |   |
| run #13          |      |      |      |     |     |    |   |   |   |
| male:            | 2556 | 4030 | 2666 | 917 | 139 | 5  | 0 | 0 | 0 |
| female:          | 2414 | 3505 | 2232 | 752 | 116 | 10 | 0 | 0 | 0 |
| male plus: 750   |      |      |      |     |     |    |   |   |   |
| female plus: 166 |      |      |      |     |     |    |   |   |   |
| run #14          |      |      |      |     |     |    |   |   |   |
| male:            | 2537 | 3796 | 2394 | 794 | 118 | 6  | 0 | 0 | 0 |
| female:          | 2394 | 3402 | 2143 | 715 | 132 | 9  | 0 | 0 | 0 |
| male plus: 644   |      |      |      |     |     |    |   |   |   |
| female plus: 187 |      |      |      |     |     |    |   |   |   |
| run #15          |      |      |      |     |     |    |   |   |   |
| male:            | 2529 | 3880 | 2419 | 739 | 94  | 4  | 0 | 0 | 0 |
| female:          | 2430 | 3426 | 2050 | 704 | 150 | 23 | 1 | 0 | 0 |
| male plus: 568   |      |      |      |     |     |    |   |   |   |
| female plus: 203 |      |      |      |     |     |    |   |   |   |
| run #16          |      |      |      |     |     |    |   |   |   |
| male:            | 2475 | 3605 | 2193 | 684 | 104 | 4  | 0 | 0 | 0 |
| female:          | 2369 | 3325 | 2098 | 663 | 116 | 13 | 0 | 0 | 0 |
| male plus: 483   |      |      |      |     |     |    |   |   |   |
| female plus: 181 |      |      |      |     |     |    |   |   |   |
| run #17          |      |      |      |     |     |    |   |   |   |
| male:            | 2538 | 3891 | 2517 | 907 | 168 | 16 | 0 | 0 | 0 |

female: 2455 3516 2266 742 107 2 0 0 0  
male plus: 884  
female plus: 153

run #18

male: 2496 3774 2417 808 118 5 0 0 0  
female: 2409 3404 2152 756 179 29 1 0 0  
male plus: 781  
female plus: 116

run #19

male: 2428 3531 2093 648 108 2 0 0 0  
female: 2391 3342 2134 730 130 15 0 0 0  
male plus: 408  
female plus: 207

run #20

male: 2537 3985 2643 929 153 5 0 0 0  
female: 2372 3313 2129 791 183 26 1 0 0  
male plus: 694  
female plus: 198
